# Supplementary material
Source: PubMed Central journal article supplement (PMC7512012)
Supplement: NIHMS1626449-supplement-Table_2.pdf [file NIHMS1626449-supplement-Table_2.pdf]

**Table S2. CNVs in BGC823 and AGS cells.**

| Sample | Chr. | start    | end      | log2_ratio | Type         |
|--------|------|----------|----------|------------|--------------|
| BGC823 | chr1 | 10000    | 177418   | 1.0466     | Copy gain    |
| BGC823 | chr1 | 227417   | 267720   | 1.0466     | Copy gain    |
| BGC823 | chr1 | 317719   | 350700   | 1.0466     | Copy gain    |
| BGC823 | chr1 | 350701   | 471369   | 4.5034     | Copy gain    |
| BGC823 | chr1 | 521368   | 569800   | 4.5034     | Copy gain    |
| BGC823 | chr1 | 569801   | 814100   | 0.852997   | Copy gain    |
| BGC823 | chr1 | 814101   | 828800   | 1.6834     | Copy gain    |
| BGC823 | chr1 | 828801   | 2583000  | 0.254897   | Copy neutral |
| BGC823 | chr1 | 2583001  | 2630600  | 2.5026     | Copy gain    |
| BGC823 | chr1 | 2630601  | 2634221  | 0.367997   | Copy neutral |
| BGC823 | chr1 | 2684220  | 3838100  | 0.367997   | Copy neutral |
| BGC823 | chr1 | 3838101  | 3845269  | 0.576997   | Copy gain    |
| BGC823 | chr1 | 3995268  | 7945000  | 0.576997   | Copy gain    |
| BGC823 | chr1 | 7945001  | 9595600  | 0.425097   | Copy neutral |
| BGC823 | chr1 | 9595601  | 9597700  | -8.1169    | Copy loss    |
| BGC823 | chr1 | 9597701  | 10753400 | 0.344597   | Copy neutral |
| BGC823 | chr1 | 10753401 | 10754800 | -4.9701    | Copy loss    |
| BGC823 | chr1 | 10754801 | 12308800 | 0.410097   | Copy neutral |
| BGC823 | chr1 | 12308801 | 12383000 | 0.586997   | Copy gain    |
| BGC823 | chr1 | 12383001 | 12392100 | 0.189197   | Copy neutral |
| BGC823 | chr1 | 12392101 | 12553100 | 0.660397   | Copy gain    |
| BGC823 | chr1 | 12553101 | 12677000 | 0.465497   | Copy gain    |
| BGC823 | chr1 | 12677001 | 12678400 | -1.0579    | Copy loss    |
| BGC823 | chr1 | 12678401 | 12698000 | 0.363297   | Copy neutral |
| BGC823 | chr1 | 12698001 | 12772200 | 0.621297   | Copy gain    |
| BGC823 | chr1 | 12772201 | 12785500 | 0.394397   | Copy neutral |
| BGC823 | chr1 | 12785501 | 12796000 | 0.884097   | Copy gain    |
| BGC823 | chr1 | 12796001 | 12835900 | 0.617497   | Copy gain    |
| BGC823 | chr1 | 12835901 | 12887000 | 0.857197   | Copy gain    |
| BGC823 | chr1 | 12887001 | 12894700 | 1.2979     | Copy gain    |
| BGC823 | chr1 | 12894701 | 12919900 | 0.720797   | Copy gain    |
| BGC823 | chr1 | 12919901 | 13052999 | 1.299      | Copy gain    |
| BGC823 | chr1 | 13102998 | 13136900 | -6.1396    | Copy loss    |
| BGC823 | chr1 | 13136901 | 13219913 | 0.280797   | Copy neutral |
| BGC823 | chr1 | 13319912 | 13557163 | 0.280797   | Copy neutral |
| BGC823 | chr1 | 13607162 | 14028000 | 0.280797   | Copy neutral |
| BGC823 | chr1 | 14028001 | 16062900 | 0.474197   | Copy gain    |
| BGC823 | chr1 | 16062901 | 16130800 | 0.357597   | Copy neutral |
| BGC823 | chr1 | 16130801 | 16199400 | 0.0677974  | Copy neutral |
| BGC823 | chr1 | 16199401 | 16832900 | 0.455897   | Copy gain    |
| BGC823 | chr1 | 16832901 | 16843050 | 1.7744     | Copy gain    |
| BGC823 | chr1 | 16843051 | 16855300 | 0.539297   | Copy gain    |
| BGC823 | chr1 | 16855301 | 16882600 | 1.4294     | Copy gain    |
| BGC823 | chr1 | 16882601 | 16890300 | 2.8883     | Copy gain    |
| BGC823 | chr1 | 16890301 | 16895550 | 3.8711     | Copy gain    |
| BGC823 | chr1 | 16895551 | 16950500 | 2.5196     | Copy gain    |
| BGC823 | chr1 | 16950501 | 16974300 | 1.8235     | Copy gain    |
| BGC823 | chr1 | 16974301 | 17029600 | 1.0307     | Copy gain    |
| BGC823 | chr1 | 17029601 | 17052000 | 1.5214     | Copy gain    |
| BGC823 | chr1 | 17052001 | 17084900 | 2.4871     | Copy gain    |

|        |      |          |          |            |              |
|--------|------|----------|----------|------------|--------------|
| BGC823 | chr1 | 17084901 | 17125659 | 1.576      | Copy gain    |
| BGC823 | chr1 | 17175658 | 17236100 | 1.576      | Copy gain    |
| BGC823 | chr1 | 17236101 | 17273200 | 1.2813     | Copy gain    |
| BGC823 | chr1 | 17273201 | 26421500 | 0.501797   | Copy gain    |
| BGC823 | chr1 | 26421501 | 28616000 | 0.403897   | Copy neutral |
| BGC823 | chr1 | 28616001 | 29066100 | 0.227397   | Copy neutral |
| BGC823 | chr1 | 29066101 | 29516900 | 0.407197   | Copy neutral |
| BGC823 | chr1 | 29516901 | 29521800 | 0.568397   | Copy gain    |
| BGC823 | chr1 | 29521801 | 29619100 | 0.973597   | Copy gain    |
| BGC823 | chr1 | 29619101 | 29878083 | 0.619597   | Copy gain    |
| BGC823 | chr1 | 30028082 | 30062900 | 0.619597   | Copy gain    |
| BGC823 | chr1 | 30062901 | 30852500 | 0.553097   | Copy gain    |
| BGC823 | chr1 | 30852501 | 31189900 | 0.650997   | Copy gain    |
| BGC823 | chr1 | 31189901 | 41446300 | 0.499397   | Copy gain    |
| BGC823 | chr1 | 41446301 | 41643700 | 0.672497   | Copy gain    |
| BGC823 | chr1 | 41643701 | 41647900 | 1.4204     | Copy gain    |
| BGC823 | chr1 | 41647901 | 42743050 | 0.667497   | Copy gain    |
| BGC823 | chr1 | 42743051 | 44093000 | 0.570797   | Copy gain    |
| BGC823 | chr1 | 44093001 | 44128000 | 0.213397   | Copy neutral |
| BGC823 | chr1 | 44128001 | 44635500 | 0.580797   | Copy gain    |
| BGC823 | chr1 | 44635501 | 44673300 | 0.313497   | Copy neutral |
| BGC823 | chr1 | 44673301 | 44869300 | 0.670097   | Copy gain    |
| BGC823 | chr1 | 44869301 | 44874900 | -0.0579026 | Copy neutral |
| BGC823 | chr1 | 44874901 | 44952600 | 0.556297   | Copy gain    |
| BGC823 | chr1 | 44952601 | 44954700 | -0.506703  | Copy loss    |
| BGC823 | chr1 | 44954701 | 45164000 | 0.580197   | Copy gain    |
| BGC823 | chr1 | 45164001 | 45260600 | 0.387397   | Copy neutral |
| BGC823 | chr1 | 45260601 | 45262000 | -8.3671    | Copy loss    |
| BGC823 | chr1 | 45262001 | 45937500 | 0.492197   | Copy gain    |
| BGC823 | chr1 | 45937501 | 45948700 | 0.210597   | Copy neutral |
| BGC823 | chr1 | 45948701 | 45951500 | -0.849703  | Copy loss    |
| BGC823 | chr1 | 45951501 | 46263000 | 0.383097   | Copy neutral |
| BGC823 | chr1 | 46263001 | 46767000 | 0.559597   | Copy gain    |
| BGC823 | chr1 | 46767001 | 46826500 | 0.205297   | Copy neutral |
| BGC823 | chr1 | 46826501 | 47093900 | 0.554397   | Copy gain    |
| BGC823 | chr1 | 47093901 | 47690300 | 0.738297   | Copy gain    |
| BGC823 | chr1 | 47690301 | 47846400 | 0.351697   | Copy neutral |
| BGC823 | chr1 | 47846401 | 47898900 | 0.598597   | Copy gain    |
| BGC823 | chr1 | 47898901 | 47912200 | 0.168197   | Copy neutral |
| BGC823 | chr1 | 47912201 | 48874700 | 0.628497   | Copy gain    |
| BGC823 | chr1 | 48874701 | 49910000 | 0.527197   | Copy gain    |
| BGC823 | chr1 | 49910001 | 50880900 | 0.595897   | Copy gain    |
| BGC823 | chr1 | 50880901 | 50893500 | -0.0471026 | Copy neutral |
| BGC823 | chr1 | 50893501 | 51102100 | 0.557697   | Copy gain    |
| BGC823 | chr1 | 51102101 | 51212700 | 0.340597   | Copy neutral |
| BGC823 | chr1 | 51212701 | 51417800 | 0.651997   | Copy gain    |
| BGC823 | chr1 | 51417801 | 51459100 | 0.346797   | Copy neutral |
| BGC823 | chr1 | 51459101 | 51644600 | 0.572597   | Copy gain    |
| BGC823 | chr1 | 51644601 | 51723700 | 0.358497   | Copy neutral |
| BGC823 | chr1 | 51723701 | 52444700 | 0.561197   | Copy gain    |
| BGC823 | chr1 | 52444701 | 53055100 | 0.472397   | Copy gain    |
| BGC823 | chr1 | 53055101 | 53206300 | 0.865097   | Copy gain    |

|        |      |          |          |            |              |
|--------|------|----------|----------|------------|--------------|
| BGC823 | chr1 | 53206301 | 53433100 | 0.361097   | Copy neutral |
| BGC823 | chr1 | 53433101 | 53472300 | 0.555997   | Copy gain    |
| BGC823 | chr1 | 53472301 | 53476500 | 1.2281     | Copy gain    |
| BGC823 | chr1 | 53476501 | 53560500 | 0.531297   | Copy gain    |
| BGC823 | chr1 | 53560501 | 53567500 | 1.3897     | Copy gain    |
| BGC823 | chr1 | 53567501 | 53601100 | 0.567497   | Copy gain    |
| BGC823 | chr1 | 53601101 | 53602500 | -1.2056    | Copy loss    |
| BGC823 | chr1 | 53602501 | 54840800 | 0.571797   | Copy gain    |
| BGC823 | chr1 | 54840801 | 55092100 | 0.372797   | Copy neutral |
| BGC823 | chr1 | 55092101 | 55095600 | -8.217     | Copy loss    |
| BGC823 | chr1 | 55095601 | 58895200 | 0.604797   | Copy gain    |
| BGC823 | chr1 | 58895201 | 59130400 | 1.0863     | Copy gain    |
| BGC823 | chr1 | 59130401 | 59214400 | 0.899597   | Copy gain    |
| BGC823 | chr1 | 59214401 | 59246600 | 1.1244     | Copy gain    |
| BGC823 | chr1 | 59246601 | 59251500 | 0.294297   | Copy neutral |
| BGC823 | chr1 | 59251501 | 59992100 | 1.0786     | Copy gain    |
| BGC823 | chr1 | 59992101 | 61148500 | 0.581997   | Copy gain    |
| BGC823 | chr1 | 61148501 | 61308800 | 0.782897   | Copy gain    |
| BGC823 | chr1 | 61308801 | 61513200 | 0.619797   | Copy gain    |
| BGC823 | chr1 | 61513201 | 61862500 | 0.00509737 | Copy neutral |
| BGC823 | chr1 | 61862501 | 62150200 | 0.625097   | Copy gain    |
| BGC823 | chr1 | 62150201 | 62167700 | 0.495497   | Copy gain    |
| BGC823 | chr1 | 62167701 | 62221600 | 0.191897   | Copy neutral |
| BGC823 | chr1 | 62221601 | 62584200 | 0.502797   | Copy gain    |
| BGC823 | chr1 | 62584201 | 62692000 | 0.300297   | Copy neutral |
| BGC823 | chr1 | 62692001 | 62930700 | 0.488597   | Copy gain    |
| BGC823 | chr1 | 62930701 | 63635600 | 0.557797   | Copy gain    |
| BGC823 | chr1 | 63635601 | 63749000 | 0.469697   | Copy gain    |
| BGC823 | chr1 | 63749001 | 63849100 | 0.278397   | Copy neutral |
| BGC823 | chr1 | 63849101 | 64066100 | 0.509497   | Copy gain    |
| BGC823 | chr1 | 64066101 | 65453500 | 0.589797   | Copy gain    |
| BGC823 | chr1 | 65453501 | 65640400 | 0.448797   | Copy neutral |
| BGC823 | chr1 | 65640401 | 66321500 | 0.581397   | Copy gain    |
| BGC823 | chr1 | 66321501 | 67080300 | 0.696897   | Copy gain    |
| BGC823 | chr1 | 67080301 | 67277700 | 0.591797   | Copy gain    |
| BGC823 | chr1 | 67277701 | 68015150 | 0.484897   | Copy gain    |
| BGC823 | chr1 | 68015151 | 68507600 | 0.627497   | Copy gain    |
| BGC823 | chr1 | 68507601 | 68518800 | 0.199097   | Copy neutral |
| BGC823 | chr1 | 68518801 | 68641300 | 0.671297   | Copy gain    |
| BGC823 | chr1 | 68641301 | 68787600 | 0.438097   | Copy neutral |
| BGC823 | chr1 | 68787601 | 70032200 | 0.560797   | Copy gain    |
| BGC823 | chr1 | 70032201 | 70036400 | -0.339403  | Copy neutral |
| BGC823 | chr1 | 70036401 | 70720300 | 0.600297   | Copy gain    |
| BGC823 | chr1 | 70720301 | 70930300 | 0.451897   | Copy gain    |
| BGC823 | chr1 | 70930301 | 71237600 | 0.641897   | Copy gain    |
| BGC823 | chr1 | 71237601 | 71240400 | -1.0101    | Copy loss    |
| BGC823 | chr1 | 71240401 | 72107700 | 0.543797   | Copy gain    |
| BGC823 | chr1 | 72107701 | 72335900 | -0.0767026 | Copy neutral |
| BGC823 | chr1 | 72335901 | 72814000 | 0.466497   | Copy gain    |
| BGC823 | chr1 | 72814001 | 73680600 | 0.905797   | Copy gain    |
| BGC823 | chr1 | 73680601 | 73712100 | 1.2062     | Copy gain    |
| BGC823 | chr1 | 73712101 | 73910200 | 0.834497   | Copy gain    |

|        |      |           |           |            |              |
|--------|------|-----------|-----------|------------|--------------|
| BGC823 | chr1 | 73910201  | 75590200  | 0.526397   | Copy gain    |
| BGC823 | chr1 | 75590201  | 75603500  | -0.0690026 | Copy neutral |
| BGC823 | chr1 | 75603501  | 75778500  | 0.450297   | Copy gain    |
| BGC823 | chr1 | 75778501  | 78122800  | 0.553897   | Copy gain    |
| BGC823 | chr1 | 78122801  | 78387400  | 0.443597   | Copy neutral |
| BGC823 | chr1 | 78387401  | 78388800  | -1.2201    | Copy loss    |
| BGC823 | chr1 | 78388801  | 78547000  | 0.484997   | Copy gain    |
| BGC823 | chr1 | 78547001  | 79169300  | 0.631097   | Copy gain    |
| BGC823 | chr1 | 79169301  | 80150000  | 0.479397   | Copy gain    |
| BGC823 | chr1 | 80150001  | 80381000  | 0.894597   | Copy gain    |
| BGC823 | chr1 | 80381001  | 80537100  | 0.468897   | Copy gain    |
| BGC823 | chr1 | 80537101  | 81881100  | 0.530397   | Copy gain    |
| BGC823 | chr1 | 81881101  | 82233900  | 0.420097   | Copy neutral |
| BGC823 | chr1 | 82233901  | 82238800  | -0.297103  | Copy neutral |
| BGC823 | chr1 | 82238801  | 83469400  | 0.459697   | Copy gain    |
| BGC823 | chr1 | 83469401  | 83478500  | -1.191     | Copy loss    |
| BGC823 | chr1 | 83478501  | 83597500  | 0.482797   | Copy gain    |
| BGC823 | chr1 | 83597501  | 83955900  | 0.692597   | Copy gain    |
| BGC823 | chr1 | 83955901  | 85778000  | 0.538197   | Copy gain    |
| BGC823 | chr1 | 85778001  | 85976100  | 1.0983     | Copy gain    |
| BGC823 | chr1 | 85976101  | 85985900  | 1.7495     | Copy gain    |
| BGC823 | chr1 | 85985901  | 86004800  | 2.1041     | Copy gain    |
| BGC823 | chr1 | 86004801  | 86041900  | 1.1294     | Copy gain    |
| BGC823 | chr1 | 86041901  | 86047500  | 0.416197   | Copy neutral |
| BGC823 | chr1 | 86047501  | 86114000  | 1.0997     | Copy gain    |
| BGC823 | chr1 | 86114001  | 93445800  | 0.562397   | Copy gain    |
| BGC823 | chr1 | 93445801  | 93923900  | 0.948297   | Copy gain    |
| BGC823 | chr1 | 93923901  | 95391100  | 1.0815     | Copy gain    |
| BGC823 | chr1 | 95391101  | 95699100  | 0.962797   | Copy gain    |
| BGC823 | chr1 | 95699101  | 95701200  | -0.162603  | Copy neutral |
| BGC823 | chr1 | 95701201  | 95957400  | 1.0643     | Copy gain    |
| BGC823 | chr1 | 95957401  | 96396300  | 0.980897   | Copy gain    |
| BGC823 | chr1 | 96396301  | 97293000  | 0.917197   | Copy gain    |
| BGC823 | chr1 | 97293001  | 99799000  | 0.990597   | Copy gain    |
| BGC823 | chr1 | 99799001  | 100167900 | 1.0784     | Copy gain    |
| BGC823 | chr1 | 100167901 | 100313500 | 0.977097   | Copy gain    |
| BGC823 | chr1 | 100313501 | 100958900 | 0.910897   | Copy gain    |
| BGC823 | chr1 | 100958901 | 101353000 | 1.0254     | Copy gain    |
| BGC823 | chr1 | 101353001 | 102344200 | 0.916597   | Copy gain    |
| BGC823 | chr1 | 102344201 | 102440800 | 1.1504     | Copy gain    |
| BGC823 | chr1 | 102440801 | 103863907 | 0.895597   | Copy gain    |
| BGC823 | chr1 | 103913906 | 106015700 | 0.895597   | Copy gain    |
| BGC823 | chr1 | 106015701 | 106023400 | -0.207603  | Copy neutral |
| BGC823 | chr1 | 106023401 | 106979600 | 0.937097   | Copy gain    |
| BGC823 | chr1 | 106979601 | 106981700 | -0.358603  | Copy neutral |
| BGC823 | chr1 | 106981701 | 107220400 | 0.929797   | Copy gain    |
| BGC823 | chr1 | 107220401 | 107224600 | 0.115697   | Copy neutral |
| BGC823 | chr1 | 107224601 | 107611000 | 0.916497   | Copy gain    |
| BGC823 | chr1 | 107611001 | 107612400 | -0.800403  | Copy loss    |
| BGC823 | chr1 | 107612401 | 107681700 | 0.901197   | Copy gain    |
| BGC823 | chr1 | 107681701 | 107685200 | 0.132597   | Copy neutral |
| BGC823 | chr1 | 107685201 | 107725100 | 0.922697   | Copy gain    |

|        |      |           |           |            |              |
|--------|------|-----------|-----------|------------|--------------|
| BGC823 | chr1 | 107725101 | 108276700 | 1.0202     | Copy gain    |
| BGC823 | chr1 | 108276701 | 108280900 | 1.6041     | Copy gain    |
| BGC823 | chr1 | 108280901 | 108732400 | 1.0093     | Copy gain    |
| BGC823 | chr1 | 108732401 | 108737300 | -0.0995026 | Copy neutral |
| BGC823 | chr1 | 108737301 | 109158000 | 1.1268     | Copy gain    |
| BGC823 | chr1 | 109158001 | 109446400 | 0.955897   | Copy gain    |
| BGC823 | chr1 | 109446401 | 109539500 | 0.863797   | Copy gain    |
| BGC823 | chr1 | 109539501 | 109646600 | 0.659297   | Copy gain    |
| BGC823 | chr1 | 109646601 | 109832800 | 0.859797   | Copy gain    |
| BGC823 | chr1 | 109832801 | 110187000 | 1.0063     | Copy gain    |
| BGC823 | chr1 | 110187001 | 110191200 | -0.0398026 | Copy neutral |
| BGC823 | chr1 | 110191201 | 111670300 | 1.0343     | Copy gain    |
| BGC823 | chr1 | 111670301 | 111708800 | 0.791197   | Copy gain    |
| BGC823 | chr1 | 111708801 | 112928200 | 1.0412     | Copy gain    |
| BGC823 | chr1 | 112928201 | 113054200 | 0.882297   | Copy gain    |
| BGC823 | chr1 | 113054201 | 113085000 | 1.0803     | Copy gain    |
| BGC823 | chr1 | 113085001 | 113676500 | 0.778297   | Copy gain    |
| BGC823 | chr1 | 113676501 | 114061500 | 0.994497   | Copy gain    |
| BGC823 | chr1 | 114061501 | 114509500 | 0.915097   | Copy gain    |
| BGC823 | chr1 | 114509501 | 115040100 | 1.0341     | Copy gain    |
| BGC823 | chr1 | 115040101 | 115214400 | 0.885097   | Copy gain    |
| BGC823 | chr1 | 115214401 | 116229400 | 1.0196     | Copy gain    |
| BGC823 | chr1 | 116229401 | 116232900 | -0.251503  | Copy neutral |
| BGC823 | chr1 | 116232901 | 116379900 | 0.970697   | Copy gain    |
| BGC823 | chr1 | 116379901 | 116382700 | -0.0512026 | Copy neutral |
| BGC823 | chr1 | 116382701 | 117133100 | 1.0078     | Copy gain    |
| BGC823 | chr1 | 117133101 | 117196800 | 1.2732     | Copy gain    |
| BGC823 | chr1 | 117196801 | 118982500 | 1.0215     | Copy gain    |
| BGC823 | chr1 | 118982501 | 119521500 | 1.2864     | Copy gain    |
| BGC823 | chr1 | 119521501 | 119551600 | 0.825997   | Copy gain    |
| BGC823 | chr1 | 119551601 | 119571200 | 1.3717     | Copy gain    |
| BGC823 | chr1 | 119571201 | 119891100 | 1.1962     | Copy gain    |
| BGC823 | chr1 | 119891101 | 120531600 | 1.3277     | Copy gain    |
| BGC823 | chr1 | 120531601 | 120638000 | 2.0562     | Copy gain    |
| BGC823 | chr1 | 120638001 | 120697157 | 1.7746     | Copy gain    |
| BGC823 | chr1 | 120747156 | 120832600 | 1.7746     | Copy gain    |
| BGC823 | chr1 | 120832601 | 120907850 | 1.0307     | Copy gain    |
| BGC823 | chr1 | 120907851 | 120936696 | 1.6209     | Copy gain    |
| BGC823 | chr1 | 121086695 | 121137800 | 2.4834     | Copy gain    |
| BGC823 | chr1 | 121137801 | 121146200 | 1.7547     | Copy gain    |
| BGC823 | chr1 | 121146201 | 121351300 | 1.3506     | Copy gain    |
| BGC823 | chr1 | 121351301 | 121360400 | 5.162      | Copy gain    |
| BGC823 | chr1 | 121360401 | 121477300 | 2.1517     | Copy gain    |
| BGC823 | chr1 | 121477301 | 121484650 | 6.8822     | Copy gain    |
| BGC823 | chr1 | 142535750 | 142541000 | 3.9548     | Copy gain    |
| BGC823 | chr1 | 142541001 | 142640400 | 2.2501     | Copy gain    |
| BGC823 | chr1 | 142640401 | 142669100 | 1.7456     | Copy gain    |
| BGC823 | chr1 | 142669101 | 142697450 | 1.1317     | Copy gain    |
| BGC823 | chr1 | 142697451 | 142727200 | 1.6594     | Copy gain    |
| BGC823 | chr1 | 142727201 | 142731023 | 2.9899     | Copy gain    |
| BGC823 | chr1 | 142781022 | 142967762 | 2.9899     | Copy gain    |
| BGC823 | chr1 | 143117761 | 143278100 | 1.9375     | Copy gain    |

|        |      |           |           |          |           |
|--------|------|-----------|-----------|----------|-----------|
| BGC823 | chr1 | 143278101 | 143284050 | 4.8137   | Copy gain |
| BGC823 | chr1 | 143284051 | 143292817 | 1.7651   | Copy gain |
| BGC823 | chr1 | 143342816 | 143429300 | 1.7651   | Copy gain |
| BGC823 | chr1 | 143429301 | 143533600 | 2.5032   | Copy gain |
| BGC823 | chr1 | 143533601 | 143542000 | 3.4349   | Copy gain |
| BGC823 | chr1 | 143542001 | 143544526 | 1.7135   | Copy gain |
| BGC823 | chr1 | 143644525 | 143771003 | 1.7135   | Copy gain |
| BGC823 | chr1 | 143871002 | 144004700 | 1.7135   | Copy gain |
| BGC823 | chr1 | 144004701 | 144023950 | 2.6934   | Copy gain |
| BGC823 | chr1 | 144023951 | 144076800 | 1.9939   | Copy gain |
| BGC823 | chr1 | 144076801 | 144095784 | 1.0289   | Copy gain |
| BGC823 | chr1 | 144145783 | 144224482 | 1.0289   | Copy gain |
| BGC823 | chr1 | 144274481 | 144401745 | 1.0289   | Copy gain |
| BGC823 | chr1 | 144451744 | 144525850 | 1.0289   | Copy gain |
| BGC823 | chr1 | 144525851 | 144556300 | 2.9048   | Copy gain |
| BGC823 | chr1 | 144556301 | 144608800 | 2.0991   | Copy gain |
| BGC823 | chr1 | 144608801 | 144622414 | 1.62     | Copy gain |
| BGC823 | chr1 | 144672413 | 144710725 | 1.62     | Copy gain |
| BGC823 | chr1 | 144810724 | 144826500 | 1.62     | Copy gain |
| BGC823 | chr1 | 144826501 | 144896500 | 2.3333   | Copy gain |
| BGC823 | chr1 | 144896501 | 144906300 | 1.0672   | Copy gain |
| BGC823 | chr1 | 144906301 | 144986100 | 2.0857   | Copy gain |
| BGC823 | chr1 | 144986101 | 145092500 | 2.6231   | Copy gain |
| BGC823 | chr1 | 145092501 | 145096700 | 1.119    | Copy gain |
| BGC823 | chr1 | 145096701 | 145125750 | 2.7587   | Copy gain |
| BGC823 | chr1 | 145125751 | 145187000 | 2.2109   | Copy gain |
| BGC823 | chr1 | 145187001 | 145381600 | 2.6065   | Copy gain |
| BGC823 | chr1 | 145381601 | 145507600 | 0.751297 | Copy gain |
| BGC823 | chr1 | 145507601 | 145751200 | 0.954497 | Copy gain |
| BGC823 | chr1 | 145751201 | 145833119 | 1.2702   | Copy gain |
| BGC823 | chr1 | 145883118 | 146164651 | 1.2702   | Copy gain |
| BGC823 | chr1 | 146214650 | 146253300 | 1.2702   | Copy gain |
| BGC823 | chr1 | 146303299 | 146330100 | 1.2702   | Copy gain |
| BGC823 | chr1 | 146330101 | 146395200 | 0.695397 | Copy gain |
| BGC823 | chr1 | 146395201 | 146494600 | 1.923    | Copy gain |
| BGC823 | chr1 | 146494601 | 147621600 | 0.985597 | Copy gain |
| BGC823 | chr1 | 147621601 | 147731500 | 1.9183   | Copy gain |
| BGC823 | chr1 | 147731501 | 148026039 | 0.983997 | Copy gain |
| BGC823 | chr1 | 148176038 | 148354150 | 0.983997 | Copy gain |
| BGC823 | chr1 | 148354151 | 148361359 | 2.0061   | Copy gain |
| BGC823 | chr1 | 148511358 | 148684148 | 2.0061   | Copy gain |
| BGC823 | chr1 | 148734147 | 148845200 | 2.0061   | Copy gain |
| BGC823 | chr1 | 148845201 | 148954461 | 2.7007   | Copy gain |
| BGC823 | chr1 | 149004460 | 149035600 | 2.7007   | Copy gain |
| BGC823 | chr1 | 149035601 | 149131500 | 1.0094   | Copy gain |
| BGC823 | chr1 | 149131501 | 149149700 | 0.483597 | Copy gain |
| BGC823 | chr1 | 149149701 | 149203600 | 0.849997 | Copy gain |
| BGC823 | chr1 | 149203601 | 149206400 | 2.1029   | Copy gain |
| BGC823 | chr1 | 149206401 | 149221100 | 0.815697 | Copy gain |
| BGC823 | chr1 | 149221101 | 149270100 | 1.5113   | Copy gain |
| BGC823 | chr1 | 149270101 | 149282000 | 2.4914   | Copy gain |
| BGC823 | chr1 | 149282001 | 149287600 | 1.7956   | Copy gain |

|        |      |           |           |            |              |
|--------|------|-----------|-----------|------------|--------------|
| BGC823 | chr1 | 149287601 | 149321900 | 2.6132     | Copy gain    |
| BGC823 | chr1 | 149321901 | 149394000 | 1.6253     | Copy gain    |
| BGC823 | chr1 | 149394001 | 149459646 | 0.216197   | Copy neutral |
| BGC823 | chr1 | 149509645 | 149647050 | 0.216197   | Copy neutral |
| BGC823 | chr1 | 149647051 | 149753800 | 1.8995     | Copy gain    |
| BGC823 | chr1 | 149753801 | 150146500 | 0.910197   | Copy gain    |
| BGC823 | chr1 | 150146501 | 151256700 | 0.781997   | Copy gain    |
| BGC823 | chr1 | 151256701 | 151937100 | 0.925497   | Copy gain    |
| BGC823 | chr1 | 151937101 | 153449100 | 1.0811     | Copy gain    |
| BGC823 | chr1 | 153449101 | 153606600 | 0.907597   | Copy gain    |
| BGC823 | chr1 | 153606601 | 153608700 | -0.269603  | Copy neutral |
| BGC823 | chr1 | 153608701 | 153666800 | 0.832697   | Copy gain    |
| BGC823 | chr1 | 153666801 | 153687100 | 0.444197   | Copy neutral |
| BGC823 | chr1 | 153687101 | 153958700 | 0.830997   | Copy gain    |
| BGC823 | chr1 | 153958701 | 153962200 | -0.385903  | Copy neutral |
| BGC823 | chr1 | 153962201 | 154017500 | 0.683597   | Copy gain    |
| BGC823 | chr1 | 154017501 | 154043400 | 1.1358     | Copy gain    |
| BGC823 | chr1 | 154043401 | 154081900 | 0.786397   | Copy gain    |
| BGC823 | chr1 | 154081901 | 154084700 | -0.653103  | Copy loss    |
| BGC823 | chr1 | 154084701 | 154511000 | 0.788597   | Copy gain    |
| BGC823 | chr1 | 154511001 | 154933800 | 0.962797   | Copy gain    |
| BGC823 | chr1 | 154933801 | 154970900 | 0.776497   | Copy gain    |
| BGC823 | chr1 | 154970901 | 154976500 | 0.112097   | Copy neutral |
| BGC823 | chr1 | 154976501 | 155180200 | 0.834497   | Copy gain    |
| BGC823 | chr1 | 155180201 | 155205400 | 2.2041     | Copy gain    |
| BGC823 | chr1 | 155205401 | 155213100 | 1.1832     | Copy gain    |
| BGC823 | chr1 | 155213101 | 156443000 | 0.812197   | Copy gain    |
| BGC823 | chr1 | 156443001 | 156569700 | 1.0164     | Copy gain    |
| BGC823 | chr1 | 156569701 | 156751000 | 0.799597   | Copy gain    |
| BGC823 | chr1 | 156751001 | 156900100 | 0.941297   | Copy gain    |
| BGC823 | chr1 | 156900101 | 157894800 | 1.0485     | Copy gain    |
| BGC823 | chr1 | 157894801 | 158867800 | 0.959397   | Copy gain    |
| BGC823 | chr1 | 158867801 | 158869900 | -8.3671    | Copy loss    |
| BGC823 | chr1 | 158869901 | 165908400 | 0.991697   | Copy gain    |
| BGC823 | chr1 | 165908401 | 166761700 | 0.570397   | Copy gain    |
| BGC823 | chr1 | 166761701 | 167528200 | 0.477297   | Copy gain    |
| BGC823 | chr1 | 167528201 | 167866300 | 0.549997   | Copy gain    |
| BGC823 | chr1 | 167866301 | 167867700 | -1.0179    | Copy loss    |
| BGC823 | chr1 | 167867701 | 168151900 | 0.578597   | Copy gain    |
| BGC823 | chr1 | 168151901 | 174363700 | 1.0098     | Copy gain    |
| BGC823 | chr1 | 174363701 | 174679400 | 0.594897   | Copy gain    |
| BGC823 | chr1 | 174679401 | 174915300 | 0.402997   | Copy neutral |
| BGC823 | chr1 | 174915301 | 174969900 | -0.111103  | Copy neutral |
| BGC823 | chr1 | 174969901 | 175005600 | 0.545897   | Copy gain    |
| BGC823 | chr1 | 175005601 | 175772100 | 1.0038     | Copy gain    |
| BGC823 | chr1 | 175772101 | 176249500 | 0.865397   | Copy gain    |
| BGC823 | chr1 | 176249501 | 177663500 | 0.972897   | Copy gain    |
| BGC823 | chr1 | 177663501 | 178026100 | 1.0769     | Copy gain    |
| BGC823 | chr1 | 178026101 | 179036200 | 0.989097   | Copy gain    |
| BGC823 | chr1 | 179036201 | 179329500 | 0.838197   | Copy gain    |
| BGC823 | chr1 | 179329501 | 179337200 | -0.0514026 | Copy neutral |
| BGC823 | chr1 | 179337201 | 182361900 | 1.0007     | Copy gain    |

|        |      |           |           |            |              |
|--------|------|-----------|-----------|------------|--------------|
| BGC823 | chr1 | 182361901 | 183200500 | 1.3061     | Copy gain    |
| BGC823 | chr1 | 183200501 | 184289700 | 0.986897   | Copy gain    |
| BGC823 | chr1 | 184289701 | 185159100 | 0.904297   | Copy gain    |
| BGC823 | chr1 | 185159101 | 187168800 | 1.0218     | Copy gain    |
| BGC823 | chr1 | 187168801 | 187464900 | 0.920897   | Copy gain    |
| BGC823 | chr1 | 187464901 | 187466300 | -8.3671    | Copy loss    |
| BGC823 | chr1 | 187466301 | 205353400 | 0.901097   | Copy gain    |
| BGC823 | chr1 | 205353401 | 205758700 | 1.1733     | Copy gain    |
| BGC823 | chr1 | 205758701 | 205922708 | 1.3398     | Copy gain    |
| BGC823 | chr1 | 206072707 | 206093300 | 1.3398     | Copy gain    |
| BGC823 | chr1 | 206093301 | 206199000 | 1.0322     | Copy gain    |
| BGC823 | chr1 | 206199001 | 206206000 | -0.0378026 | Copy neutral |
| BGC823 | chr1 | 206206001 | 206253600 | 0.841697   | Copy gain    |
| BGC823 | chr1 | 206253601 | 206331300 | 1.2325     | Copy gain    |
| BGC823 | chr1 | 206331301 | 206332222 | 1.6674     | Copy gain    |
| BGC823 | chr1 | 206482221 | 206563350 | 1.6674     | Copy gain    |
| BGC823 | chr1 | 206563351 | 206583300 | 2.2766     | Copy gain    |
| BGC823 | chr1 | 206583301 | 206785600 | 0.893297   | Copy gain    |
| BGC823 | chr1 | 206785601 | 206787000 | -0.297103  | Copy neutral |
| BGC823 | chr1 | 206787001 | 206957100 | 0.900297   | Copy gain    |
| BGC823 | chr1 | 206957101 | 207542300 | 1.062      | Copy gain    |
| BGC823 | chr1 | 207542301 | 207545800 | -0.100403  | Copy neutral |
| BGC823 | chr1 | 207545801 | 207718700 | 0.998297   | Copy gain    |
| BGC823 | chr1 | 207718701 | 207743900 | 0.195197   | Copy neutral |
| BGC823 | chr1 | 207743901 | 207898600 | 1.0467     | Copy gain    |
| BGC823 | chr1 | 207898601 | 210078400 | 0.920397   | Copy gain    |
| BGC823 | chr1 | 210078401 | 210085400 | -8.3671    | Copy loss    |
| BGC823 | chr1 | 210085401 | 223747847 | 0.884197   | Copy gain    |
| BGC823 | chr1 | 223797846 | 230132700 | 0.884197   | Copy gain    |
| BGC823 | chr1 | 230132701 | 230134100 | -4.5216    | Copy loss    |
| BGC823 | chr1 | 230134101 | 230202000 | 0.966297   | Copy gain    |
| BGC823 | chr1 | 230202001 | 230204100 | 0.146797   | Copy neutral |
| BGC823 | chr1 | 230204101 | 230279700 | 0.921197   | Copy gain    |
| BGC823 | chr1 | 230279701 | 230363700 | 0.431697   | Copy neutral |
| BGC823 | chr1 | 230363701 | 230964300 | 0.899997   | Copy gain    |
| BGC823 | chr1 | 230964301 | 231740600 | 0.837597   | Copy gain    |
| BGC823 | chr1 | 231740601 | 233962400 | 0.932397   | Copy gain    |
| BGC823 | chr1 | 233962401 | 233963800 | -4.1788    | Copy loss    |
| BGC823 | chr1 | 233963801 | 233973600 | 0.765997   | Copy gain    |
| BGC823 | chr1 | 233973601 | 234039400 | 1.0363     | Copy gain    |
| BGC823 | chr1 | 234039401 | 234045000 | 0.523397   | Copy gain    |
| BGC823 | chr1 | 234045001 | 234193400 | 1.0405     | Copy gain    |
| BGC823 | chr1 | 234193401 | 234217900 | 0.490497   | Copy gain    |
| BGC823 | chr1 | 234217901 | 234485300 | 0.979597   | Copy gain    |
| BGC823 | chr1 | 234485301 | 235006100 | 1.573      | Copy gain    |
| BGC823 | chr1 | 235006101 | 235192212 | 0.824097   | Copy gain    |
| BGC823 | chr1 | 235242211 | 247639000 | 0.824097   | Copy gain    |
| BGC823 | chr1 | 247639001 | 247905700 | 1.2635     | Copy gain    |
| BGC823 | chr1 | 247905701 | 247977100 | 0.890497   | Copy gain    |
| BGC823 | chr1 | 247977101 | 248071600 | 0.709297   | Copy gain    |
| BGC823 | chr1 | 248071601 | 248595900 | 0.890497   | Copy gain    |
| BGC823 | chr1 | 248595901 | 248599400 | 0.0976974  | Copy neutral |



|        |      |           |           |            |              |
|--------|------|-----------|-----------|------------|--------------|
| BGC823 | chr1 | 248599401 | 248623200 | 1.4598     | Copy gain    |
| BGC823 | chr1 | 248623201 | 248753400 | 1.0538     | Copy gain    |
| BGC823 | chr1 | 248753401 | 248908211 | 0.833797   | Copy gain    |
| BGC823 | chr1 | 249058210 | 249240622 | 0.833797   | Copy gain    |
| BGC823 | chr1 | 249250621 | 249250621 | 0.833797   | Copy gain    |
| BGC823 | chr2 | 10000     | 3529313   | -0.0855026 | Copy neutral |
| BGC823 | chr2 | 3579312   | 5018789   | -0.0855026 | Copy neutral |
| BGC823 | chr2 | 5118788   | 16271500  | -0.0855026 | Copy neutral |
| BGC823 | chr2 | 16271501  | 16273600  | -8.1169    | Copy loss    |
| BGC823 | chr2 | 16273601  | 16279725  | -0.0896026 | Copy neutral |
| BGC823 | chr2 | 16329724  | 18166050  | -0.0896026 | Copy neutral |
| BGC823 | chr2 | 18166051  | 18195800  | -1.1203    | Copy loss    |
| BGC823 | chr2 | 18195801  | 19564300  | -0.0567026 | Copy neutral |
| BGC823 | chr2 | 19564301  | 20717900  | 0.0210974  | Copy neutral |
| BGC823 | chr2 | 20717901  | 21153114  | 0.0880974  | Copy neutral |
| BGC823 | chr2 | 21178113  | 22194200  | 0.0880974  | Copy neutral |
| BGC823 | chr2 | 22194201  | 23652300  | 0.0284974  | Copy neutral |
| BGC823 | chr2 | 23652301  | 31725940  | -0.0810026 | Copy neutral |
| BGC823 | chr2 | 31726790  | 33092198  | -0.0810026 | Copy neutral |
| BGC823 | chr2 | 33093197  | 33141693  | -0.0810026 | Copy neutral |
| BGC823 | chr2 | 33142692  | 34524000  | -0.0810026 | Copy neutral |
| BGC823 | chr2 | 34524001  | 34525400  | -6.7021    | Copy loss    |
| BGC823 | chr2 | 34525401  | 38562300  | -0.0145026 | Copy neutral |
| BGC823 | chr2 | 38562301  | 39718700  | 0.889597   | Copy gain    |
| BGC823 | chr2 | 39718701  | 40763800  | 1.0448     | Copy gain    |
| BGC823 | chr2 | 40763801  | 40765200  | 0.102797   | Copy neutral |
| BGC823 | chr2 | 40765201  | 40771500  | -8.3671    | Copy loss    |
| BGC823 | chr2 | 40771501  | 41774600  | 0.976597   | Copy gain    |
| BGC823 | chr2 | 41774601  | 42198100  | 1.1025     | Copy gain    |
| BGC823 | chr2 | 42198101  | 42578200  | 0.979797   | Copy gain    |
| BGC823 | chr2 | 42578201  | 42623700  | 1.4923     | Copy gain    |
| BGC823 | chr2 | 42623701  | 42693700  | 1.0357     | Copy gain    |
| BGC823 | chr2 | 42693701  | 42877800  | 0.672797   | Copy gain    |
| BGC823 | chr2 | 42877801  | 43105300  | 0.920997   | Copy gain    |
| BGC823 | chr2 | 43105301  | 43144500  | 1.1452     | Copy gain    |
| BGC823 | chr2 | 43144501  | 43223600  | 1.5124     | Copy gain    |
| BGC823 | chr2 | 43223601  | 43335600  | 0.992997   | Copy gain    |
| BGC823 | chr2 | 43335601  | 43356600  | 1.8875     | Copy gain    |
| BGC823 | chr2 | 43356601  | 43369900  | 1.3934     | Copy gain    |
| BGC823 | chr2 | 43369901  | 43451100  | 1.7562     | Copy gain    |
| BGC823 | chr2 | 43451101  | 43454600  | 0.411697   | Copy neutral |
| BGC823 | chr2 | 43454601  | 43485400  | 1.9195     | Copy gain    |
| BGC823 | chr2 | 43485401  | 43754200  | 1.3808     | Copy gain    |
| BGC823 | chr2 | 43754201  | 44972200  | 0.923697   | Copy gain    |
| BGC823 | chr2 | 44972201  | 45153500  | 1.2876     | Copy gain    |
| BGC823 | chr2 | 45153501  | 45173100  | 0.623497   | Copy gain    |
| BGC823 | chr2 | 45173101  | 45242400  | 1.0742     | Copy gain    |
| BGC823 | chr2 | 45242401  | 45395700  | 1.3287     | Copy gain    |
| BGC823 | chr2 | 45395701  | 45397800  | 0.232897   | Copy neutral |
| BGC823 | chr2 | 45397801  | 45877300  | 1.3273     | Copy gain    |
| BGC823 | chr2 | 45877301  | 45879400  | 0.00159737 | Copy neutral |
| BGC823 | chr2 | 45879401  | 46083100  | 1.3719     | Copy gain    |

|        |      |          |           |            |              |
|--------|------|----------|-----------|------------|--------------|
| BGC823 | chr2 | 46083101 | 47114900  | 1.0878     | Copy gain    |
| BGC823 | chr2 | 47114901 | 56676200  | 0.938797   | Copy gain    |
| BGC823 | chr2 | 56676201 | 56886200  | 0.622197   | Copy gain    |
| BGC823 | chr2 | 56886201 | 57022000  | 0.00509737 | Copy neutral |
| BGC823 | chr2 | 57022001 | 68677000  | 0.535997   | Copy gain    |
| BGC823 | chr2 | 68677001 | 68679100  | -5.4042    | Copy loss    |
| BGC823 | chr2 | 68679101 | 76773900  | 0.573497   | Copy gain    |
| BGC823 | chr2 | 76773901 | 76775300  | -8.3671    | Copy loss    |
| BGC823 | chr2 | 76775301 | 87311000  | 0.514897   | Copy gain    |
| BGC823 | chr2 | 87311001 | 87564750  | 0.822797   | Copy gain    |
| BGC823 | chr2 | 87564751 | 87627400  | 1.6437     | Copy gain    |
| BGC823 | chr2 | 87627401 | 87632300  | -0.687703  | Copy loss    |
| BGC823 | chr2 | 87632301 | 87668207  | 0.883797   | Copy gain    |
| BGC823 | chr2 | 87718206 | 88259150  | 0.883797   | Copy gain    |
| BGC823 | chr2 | 88259151 | 89455800  | 0.531497   | Copy gain    |
| BGC823 | chr2 | 89455801 | 89512500  | 0.778297   | Copy gain    |
| BGC823 | chr2 | 89512501 | 89563600  | 1.444      | Copy gain    |
| BGC823 | chr2 | 89563601 | 89630437  | 0.457997   | Copy gain    |
| BGC823 | chr2 | 89830436 | 89854100  | 2.142      | Copy gain    |
| BGC823 | chr2 | 89854101 | 89859000  | 1.6851     | Copy gain    |
| BGC823 | chr2 | 89859001 | 89864600  | 0.716297   | Copy gain    |
| BGC823 | chr2 | 89864601 | 89880000  | 3.9448     | Copy gain    |
| BGC823 | chr2 | 89880001 | 89958750  | 1.1055     | Copy gain    |
| BGC823 | chr2 | 89958751 | 90008100  | -0.694503  | Copy loss    |
| BGC823 | chr2 | 90008101 | 90136200  | 0.774697   | Copy gain    |
| BGC823 | chr2 | 90136201 | 90208300  | 1.1012     | Copy gain    |
| BGC823 | chr2 | 90208301 | 90281100  | 0.778197   | Copy gain    |
| BGC823 | chr2 | 90281101 | 90321526  | 2.4559     | Copy gain    |
| BGC823 | chr2 | 90371525 | 90443500  | 2.4559     | Copy gain    |
| BGC823 | chr2 | 90443501 | 90449100  | -8.3671    | Copy loss    |
| BGC823 | chr2 | 90449101 | 90545104  | 1.7726     | Copy gain    |
| BGC823 | chr2 | 91595103 | 91695100  | 1.7726     | Copy gain    |
| BGC823 | chr2 | 91695101 | 91717850  | 0.144497   | Copy neutral |
| BGC823 | chr2 | 91717851 | 91758800  | 1.6796     | Copy gain    |
| BGC823 | chr2 | 91758801 | 91824950  | 3.1489     | Copy gain    |
| BGC823 | chr2 | 91824951 | 91924700  | 2.1714     | Copy gain    |
| BGC823 | chr2 | 91924701 | 91970900  | 1.0737     | Copy gain    |
| BGC823 | chr2 | 91970901 | 92004150  | 2.1533     | Copy gain    |
| BGC823 | chr2 | 92004151 | 92260700  | 1.1291     | Copy gain    |
| BGC823 | chr2 | 92260701 | 92263500  | -0.882603  | Copy loss    |
| BGC823 | chr2 | 92263501 | 92268400  | 1.612      | Copy gain    |
| BGC823 | chr2 | 92268401 | 92269800  | 4.6513     | Copy gain    |
| BGC823 | chr2 | 92269801 | 92281000  | 1.3039     | Copy gain    |
| BGC823 | chr2 | 92281001 | 92289400  | 2.7848     | Copy gain    |
| BGC823 | chr2 | 92289401 | 92305500  | 3.585      | Copy gain    |
| BGC823 | chr2 | 92305501 | 92326172  | 7.1929     | Copy gain    |
| BGC823 | chr2 | 95326171 | 97803300  | 0.991697   | Copy gain    |
| BGC823 | chr2 | 97803301 | 97860000  | 1.508      | Copy gain    |
| BGC823 | chr2 | 97860001 | 97916700  | 2.1268     | Copy gain    |
| BGC823 | chr2 | 97916701 | 98126000  | 1.0131     | Copy gain    |
| BGC823 | chr2 | 98126001 | 98162400  | -4.3024    | Copy loss    |
| BGC823 | chr2 | 98162401 | 101234700 | 0.944097   | Copy gain    |

|        |      |           |           |            |              |
|--------|------|-----------|-----------|------------|--------------|
| BGC823 | chr2 | 101234701 | 101434900 | 1.4582     | Copy gain    |
| BGC823 | chr2 | 101434901 | 101437700 | 0.407097   | Copy neutral |
| BGC823 | chr2 | 101437701 | 101668700 | 1.3728     | Copy gain    |
| BGC823 | chr2 | 101668701 | 110109338 | 0.923097   | Copy gain    |
| BGC823 | chr2 | 110251337 | 110477500 | 0.923097   | Copy gain    |
| BGC823 | chr2 | 110477501 | 111874000 | 1.0683     | Copy gain    |
| BGC823 | chr2 | 111874001 | 111881700 | 0.293697   | Copy neutral |
| BGC823 | chr2 | 111881701 | 112004900 | 1.0472     | Copy gain    |
| BGC823 | chr2 | 112004901 | 112373800 | 1.3029     | Copy gain    |
| BGC823 | chr2 | 112373801 | 112503300 | 1.0524     | Copy gain    |
| BGC823 | chr2 | 112503301 | 112557900 | 1.4025     | Copy gain    |
| BGC823 | chr2 | 112557901 | 113031100 | 0.968897   | Copy gain    |
| BGC823 | chr2 | 113031101 | 113033900 | 0.0530974  | Copy neutral |
| BGC823 | chr2 | 113033901 | 113622600 | 1.0075     | Copy gain    |
| BGC823 | chr2 | 113622601 | 114359000 | 1.1108     | Copy gain    |
| BGC823 | chr2 | 114359001 | 114361100 | -1.0725    | Copy loss    |
| BGC823 | chr2 | 114361101 | 114441600 | 1.0714     | Copy gain    |
| BGC823 | chr2 | 114441601 | 114669800 | 0.926697   | Copy gain    |
| BGC823 | chr2 | 114669801 | 115143700 | 1.0578     | Copy gain    |
| BGC823 | chr2 | 115143701 | 126443800 | 0.931697   | Copy gain    |
| BGC823 | chr2 | 126443801 | 126451500 | -8.3671    | Copy loss    |
| BGC823 | chr2 | 126451501 | 126795900 | 0.912097   | Copy gain    |
| BGC823 | chr2 | 126795901 | 127802500 | 1.0082     | Copy gain    |
| BGC823 | chr2 | 127802501 | 127865500 | 0.754797   | Copy gain    |
| BGC823 | chr2 | 127865501 | 128319800 | 0.991197   | Copy gain    |
| BGC823 | chr2 | 128319801 | 129143000 | 0.864197   | Copy gain    |
| BGC823 | chr2 | 129143001 | 130438000 | -0.0591026 | Copy neutral |
| BGC823 | chr2 | 130438001 | 130439400 | -8.3671    | Copy loss    |
| BGC823 | chr2 | 130439401 | 130956000 | -0.100603  | Copy neutral |
| BGC823 | chr2 | 130956001 | 130957400 | -4.9287    | Copy loss    |
| BGC823 | chr2 | 130957401 | 131941600 | -0.0467026 | Copy neutral |
| BGC823 | chr2 | 131941601 | 132168400 | 0.205497   | Copy neutral |
| BGC823 | chr2 | 132168401 | 132213900 | -0.193603  | Copy neutral |
| BGC823 | chr2 | 132213901 | 132220200 | -1.4511    | Copy loss    |
| BGC823 | chr2 | 132220201 | 132287400 | -0.192903  | Copy neutral |
| BGC823 | chr2 | 132287401 | 132566000 | 0.0735974  | Copy neutral |
| BGC823 | chr2 | 132566001 | 132568800 | 1.3023     | Copy gain    |
| BGC823 | chr2 | 132568801 | 132762700 | 0.0516974  | Copy neutral |
| BGC823 | chr2 | 132762701 | 132768300 | 0.629597   | Copy gain    |
| BGC823 | chr2 | 132768301 | 132776000 | 2.0831     | Copy gain    |
| BGC823 | chr2 | 132776001 | 132834100 | 0.772697   | Copy gain    |
| BGC823 | chr2 | 132834101 | 132966400 | 0.152197   | Copy neutral |
| BGC823 | chr2 | 132966401 | 132984600 | 0.909697   | Copy gain    |
| BGC823 | chr2 | 132984601 | 132997200 | 0.337597   | Copy neutral |
| BGC823 | chr2 | 132997201 | 133032900 | 2.3952     | Copy gain    |
| BGC823 | chr2 | 133032901 | 133038500 | 1.1957     | Copy gain    |
| BGC823 | chr2 | 133038501 | 133043400 | 1.5659     | Copy gain    |
| BGC823 | chr2 | 133043401 | 133045500 | 2.6146     | Copy gain    |
| BGC823 | chr2 | 133045501 | 133121800 | 1.4028     | Copy gain    |
| BGC823 | chr2 | 133121801 | 134584800 | 0.0361974  | Copy neutral |
| BGC823 | chr2 | 134584801 | 136937500 | -0.0933026 | Copy neutral |
| BGC823 | chr2 | 136937501 | 137103400 | -0.0113026 | Copy neutral |

|        |      |           |           |             |              |
|--------|------|-----------|-----------|-------------|--------------|
| BGC823 | chr2 | 137103401 | 137104800 | -8.3671     | Copy loss    |
| BGC823 | chr2 | 137104801 | 139994400 | -0.00430263 | Copy neutral |
| BGC823 | chr2 | 139994401 | 141742300 | -0.0870026  | Copy neutral |
| BGC823 | chr2 | 141742301 | 141830500 | -0.936803   | Copy loss    |
| BGC823 | chr2 | 141830501 | 142982700 | -0.0728026  | Copy neutral |
| BGC823 | chr2 | 142982701 | 144379900 | 0.0789974   | Copy neutral |
| BGC823 | chr2 | 144379901 | 145273100 | -0.0184026  | Copy neutral |
| BGC823 | chr2 | 145273101 | 145282200 | -0.788503   | Copy loss    |
| BGC823 | chr2 | 145282201 | 149150400 | 0.00199737  | Copy neutral |
| BGC823 | chr2 | 149150401 | 149683800 | 0.567297    | Copy gain    |
| BGC823 | chr2 | 149683801 | 149690583 | -0.0387026  | Copy neutral |
| BGC823 | chr2 | 149790582 | 153215300 | -0.0387026  | Copy neutral |
| BGC823 | chr2 | 153215301 | 153426700 | -1.0708     | Copy loss    |
| BGC823 | chr2 | 153426701 | 157821300 | -0.0319026  | Copy neutral |
| BGC823 | chr2 | 157821301 | 158134200 | 0.592697    | Copy gain    |
| BGC823 | chr2 | 158134201 | 158651500 | -0.0268026  | Copy neutral |
| BGC823 | chr2 | 158651501 | 158915400 | -0.150603   | Copy neutral |
| BGC823 | chr2 | 158915401 | 160098400 | 0.0128974   | Copy neutral |
| BGC823 | chr2 | 160098401 | 160099800 | -7.9917     | Copy loss    |
| BGC823 | chr2 | 160099801 | 160709500 | -0.0185026  | Copy neutral |
| BGC823 | chr2 | 160709501 | 162091300 | 0.0873974   | Copy neutral |
| BGC823 | chr2 | 162091301 | 162134700 | -0.108903   | Copy neutral |
| BGC823 | chr2 | 162134701 | 162138900 | 3.8851      | Copy gain    |
| BGC823 | chr2 | 162138901 | 162332800 | -0.0159026  | Copy neutral |
| BGC823 | chr2 | 162332801 | 162334200 | -6.4387     | Copy loss    |
| BGC823 | chr2 | 162334201 | 163324000 | 0.0528974   | Copy neutral |
| BGC823 | chr2 | 163324001 | 165001900 | -0.0277026  | Copy neutral |
| BGC823 | chr2 | 165001901 | 166014800 | 0.0502974   | Copy neutral |
| BGC823 | chr2 | 166014801 | 166016200 | -8.3671     | Copy loss    |
| BGC823 | chr2 | 166016201 | 170321900 | -0.0610026  | Copy neutral |
| BGC823 | chr2 | 170321901 | 170324700 | -8.3671     | Copy loss    |
| BGC823 | chr2 | 170324701 | 177265900 | -0.0750026  | Copy neutral |
| BGC823 | chr2 | 177265901 | 177272200 | -8.2837     | Copy loss    |
| BGC823 | chr2 | 177272201 | 184849000 | 0.0219974   | Copy neutral |
| BGC823 | chr2 | 184849001 | 184850400 | -8.3671     | Copy loss    |
| BGC823 | chr2 | 184850401 | 187429900 | 0.0467974   | Copy neutral |
| BGC823 | chr2 | 187429901 | 187455800 | 0.493197    | Copy gain    |
| BGC823 | chr2 | 187455801 | 187700800 | 0.976397    | Copy gain    |
| BGC823 | chr2 | 187700801 | 188608000 | 0.564697    | Copy gain    |
| BGC823 | chr2 | 188608001 | 194689600 | 0.0346974   | Copy neutral |
| BGC823 | chr2 | 194689601 | 194698700 | -8.0224     | Copy loss    |
| BGC823 | chr2 | 194698701 | 199763900 | -0.0124026  | Copy neutral |
| BGC823 | chr2 | 199763901 | 200086600 | 0.524597    | Copy gain    |
| BGC823 | chr2 | 200086601 | 200108300 | 0.757097    | Copy gain    |
| BGC823 | chr2 | 200108301 | 200319700 | 0.463397    | Copy gain    |
| BGC823 | chr2 | 200319701 | 200364500 | 0.150597    | Copy neutral |
| BGC823 | chr2 | 200364501 | 200521300 | 0.464197    | Copy gain    |
| BGC823 | chr2 | 200521301 | 200822300 | -0.103603   | Copy neutral |
| BGC823 | chr2 | 200822301 | 201688900 | 0.0511974   | Copy neutral |
| BGC823 | chr2 | 201688901 | 201932500 | -0.108503   | Copy neutral |
| BGC823 | chr2 | 201932501 | 201985000 | -0.431703   | Copy neutral |
| BGC823 | chr2 | 201985001 | 202570200 | 0.00599737  | Copy neutral |

|        |      |           |           |              |              |
|--------|------|-----------|-----------|--------------|--------------|
| BGC823 | chr2 | 202570201 | 203076300 | -0.134503    | Copy neutral |
| BGC823 | chr2 | 203076301 | 203354200 | -0.339203    | Copy neutral |
| BGC823 | chr2 | 203354201 | 204099700 | -0.141203    | Copy neutral |
| BGC823 | chr2 | 204099701 | 204194900 | -0.399603    | Copy neutral |
| BGC823 | chr2 | 204194901 | 204532300 | -0.120003    | Copy neutral |
| BGC823 | chr2 | 204532301 | 204968400 | 0.0392974    | Copy neutral |
| BGC823 | chr2 | 204968401 | 205207100 | -0.0850026   | Copy neutral |
| BGC823 | chr2 | 205207101 | 205672600 | 0.0753974    | Copy neutral |
| BGC823 | chr2 | 205672601 | 206796100 | 0.514997     | Copy gain    |
| BGC823 | chr2 | 206796101 | 207140500 | 0.339397     | Copy neutral |
| BGC823 | chr2 | 207140501 | 207270000 | 0.561597     | Copy gain    |
| BGC823 | chr2 | 207270001 | 207271400 | -0.982403    | Copy loss    |
| BGC823 | chr2 | 207271401 | 208392800 | 0.567897     | Copy gain    |
| BGC823 | chr2 | 208392801 | 209139000 | 0.425497     | Copy neutral |
| BGC823 | chr2 | 209139001 | 209475700 | 0.539097     | Copy gain    |
| BGC823 | chr2 | 209475701 | 211245300 | -0.0377026   | Copy neutral |
| BGC823 | chr2 | 211245301 | 211710100 | -0.823103    | Copy loss    |
| BGC823 | chr2 | 211710101 | 220053400 | -0.0624026   | Copy neutral |
| BGC823 | chr2 | 220053401 | 220056200 | -8.1794      | Copy loss    |
| BGC823 | chr2 | 220056201 | 221229400 | -0.0384026   | Copy neutral |
| BGC823 | chr2 | 221229401 | 221235000 | -0.829103    | Copy loss    |
| BGC823 | chr2 | 221235001 | 221664100 | 0.00209737   | Copy neutral |
| BGC823 | chr2 | 221664101 | 222294100 | -0.103403    | Copy neutral |
| BGC823 | chr2 | 222294101 | 222541200 | -0.219703    | Copy neutral |
| BGC823 | chr2 | 222541201 | 223155100 | -0.0730026   | Copy neutral |
| BGC823 | chr2 | 223155101 | 223174000 | -0.599503    | Copy loss    |
| BGC823 | chr2 | 223174001 | 223192900 | -0.185503    | Copy neutral |
| BGC823 | chr2 | 223192901 | 224531300 | 0.0244974    | Copy neutral |
| BGC823 | chr2 | 224531301 | 224688800 | -0.136303    | Copy neutral |
| BGC823 | chr2 | 224688801 | 224693000 | -0.939503    | Copy loss    |
| BGC823 | chr2 | 224693001 | 224799400 | -0.162103    | Copy neutral |
| BGC823 | chr2 | 224799401 | 224914200 | -0.0171026   | Copy neutral |
| BGC823 | chr2 | 224914201 | 225114400 | 0.136497     | Copy neutral |
| BGC823 | chr2 | 225114401 | 225991500 | -0.0388026   | Copy neutral |
| BGC823 | chr2 | 225991501 | 227165400 | 0.101497     | Copy neutral |
| BGC823 | chr2 | 227165401 | 227171000 | -8.3671      | Copy loss    |
| BGC823 | chr2 | 227171001 | 228232200 | 0.0543974    | Copy neutral |
| BGC823 | chr2 | 228232201 | 228372900 | -0.135803    | Copy neutral |
| BGC823 | chr2 | 228372901 | 228458300 | 0.115697     | Copy neutral |
| BGC823 | chr2 | 228458301 | 228485600 | -0.215103    | Copy neutral |
| BGC823 | chr2 | 228485601 | 228499600 | 0.161597     | Copy neutral |
| BGC823 | chr2 | 228499601 | 228652200 | -0.247003    | Copy neutral |
| BGC823 | chr2 | 228652201 | 228772600 | -0.0640026   | Copy neutral |
| BGC823 | chr2 | 228772601 | 228781700 | 0.828397     | Copy gain    |
| BGC823 | chr2 | 228781701 | 229264700 | -0.000102632 | Copy neutral |
| BGC823 | chr2 | 229264701 | 229268200 | -8.3671      | Copy loss    |
| BGC823 | chr2 | 229268201 | 230764800 | -0.0543026   | Copy neutral |
| BGC823 | chr2 | 230764801 | 230935600 | -0.370403    | Copy neutral |
| BGC823 | chr2 | 230935601 | 231105000 | -0.0388026   | Copy neutral |
| BGC823 | chr2 | 231105001 | 231357000 | 0.0918974    | Copy neutral |
| BGC823 | chr2 | 231357001 | 232299200 | -0.0753026   | Copy neutral |
| BGC823 | chr2 | 232299201 | 232316000 | -0.623103    | Copy loss    |

|        |      |           |           |            |              |
|--------|------|-----------|-----------|------------|--------------|
| BGC823 | chr2 | 232316001 | 232397200 | -0.145103  | Copy neutral |
| BGC823 | chr2 | 232397201 | 232400000 | -8.3671    | Copy loss    |
| BGC823 | chr2 | 232400001 | 232486100 | -0.217303  | Copy neutral |
| BGC823 | chr2 | 232486101 | 232524600 | -0.577903  | Copy loss    |
| BGC823 | chr2 | 232524601 | 232598800 | -0.142503  | Copy neutral |
| BGC823 | chr2 | 232598801 | 232600900 | -1.3466    | Copy loss    |
| BGC823 | chr2 | 232600901 | 232692950 | -0.0595026 | Copy neutral |
| BGC823 | chr2 | 232692951 | 232698200 | -7.7236    | Copy loss    |
| BGC823 | chr2 | 232698201 | 234003742 | -0.0482026 | Copy neutral |
| BGC823 | chr2 | 234053741 | 236578300 | -0.0482026 | Copy neutral |
| BGC823 | chr2 | 236578301 | 236579700 | -8.3671    | Copy loss    |
| BGC823 | chr2 | 236579701 | 239801979 | -0.0526026 | Copy neutral |
| BGC823 | chr2 | 239831978 | 240784133 | -0.0526026 | Copy neutral |
| BGC823 | chr2 | 240809132 | 242745300 | -0.0526026 | Copy neutral |
| BGC823 | chr2 | 242745301 | 242748450 | -8.3671    | Copy loss    |
| BGC823 | chr2 | 242748451 | 243017600 | -0.112403  | Copy neutral |
| BGC823 | chr2 | 243017601 | 243050850 | 0.265197   | Copy neutral |
| BGC823 | chr2 | 243050851 | 243102477 | 0.565797   | Copy gain    |
| BGC823 | chr2 | 243152476 | 243189374 | 0.565797   | Copy gain    |
| BGC823 | chr2 | 243199373 | 243199373 | 0.565797   | Copy gain    |
| BGC823 | chr3 | 60000     | 3522400   | 0.529297   | Copy gain    |
| BGC823 | chr3 | 3522401   | 3840200   | 0.939697   | Copy gain    |
| BGC823 | chr3 | 3840201   | 4652200   | 0.632997   | Copy gain    |
| BGC823 | chr3 | 4652201   | 4654300   | -0.654703  | Copy loss    |
| BGC823 | chr3 | 4654301   | 5044900   | 0.645097   | Copy gain    |
| BGC823 | chr3 | 5044901   | 5177900   | 0.394297   | Copy neutral |
| BGC823 | chr3 | 5177901   | 5748400   | 0.607097   | Copy gain    |
| BGC823 | chr3 | 5748401   | 7400400   | 0.502097   | Copy gain    |
| BGC823 | chr3 | 7400401   | 7401800   | -1.8462    | Copy loss    |
| BGC823 | chr3 | 7401801   | 8094100   | 0.486697   | Copy gain    |
| BGC823 | chr3 | 8094101   | 8542100   | 0.592097   | Copy gain    |
| BGC823 | chr3 | 8542101   | 8544200   | -0.530303  | Copy loss    |
| BGC823 | chr3 | 8544201   | 8613500   | 0.596197   | Copy gain    |
| BGC823 | chr3 | 8613501   | 8717100   | 1.0496     | Copy gain    |
| BGC823 | chr3 | 8717101   | 8723400   | 0.498897   | Copy gain    |
| BGC823 | chr3 | 8723401   | 8808800   | 1.022      | Copy gain    |
| BGC823 | chr3 | 8808801   | 8811600   | 0.158097   | Copy neutral |
| BGC823 | chr3 | 8811601   | 8819300   | 1.0211     | Copy gain    |
| BGC823 | chr3 | 8819301   | 8841000   | 0.0166974  | Copy neutral |
| BGC823 | chr3 | 8841001   | 9403100   | 1.0573     | Copy gain    |
| BGC823 | chr3 | 9403101   | 9410800   | 0.589297   | Copy gain    |
| BGC823 | chr3 | 9410801   | 9438100   | 1.0182     | Copy gain    |
| BGC823 | chr3 | 9438101   | 9440200   | 0.0914974  | Copy neutral |
| BGC823 | chr3 | 9440201   | 9459100   | 0.971697   | Copy gain    |
| BGC823 | chr3 | 9459101   | 9625700   | 0.479897   | Copy gain    |
| BGC823 | chr3 | 9625701   | 9699900   | 0.236197   | Copy neutral |
| BGC823 | chr3 | 9699901   | 10013500  | 0.904097   | Copy gain    |
| BGC823 | chr3 | 10013501  | 10325000  | 0.370197   | Copy neutral |
| BGC823 | chr3 | 10325001  | 11258800  | 0.626397   | Copy gain    |
| BGC823 | chr3 | 11258801  | 11828600  | 0.487097   | Copy gain    |
| BGC823 | chr3 | 11828601  | 12583900  | 0.622797   | Copy gain    |
| BGC823 | chr3 | 12583901  | 13638800  | 0.495297   | Copy gain    |

|        |      |          |          |             |              |
|--------|------|----------|----------|-------------|--------------|
| BGC823 | chr3 | 13638801 | 14420700 | 0.657897    | Copy gain    |
| BGC823 | chr3 | 14420701 | 15700300 | 0.572997    | Copy gain    |
| BGC823 | chr3 | 15700301 | 16193800 | 0.634797    | Copy gain    |
| BGC823 | chr3 | 16193801 | 25186700 | 0.957097    | Copy gain    |
| BGC823 | chr3 | 25186701 | 41628300 | 0.556797    | Copy gain    |
| BGC823 | chr3 | 41628301 | 41890800 | 0.0118974   | Copy neutral |
| BGC823 | chr3 | 41890801 | 46795700 | 0.570297    | Copy gain    |
| BGC823 | chr3 | 46795701 | 46851000 | -0.928703   | Copy loss    |
| BGC823 | chr3 | 46851001 | 47014100 | 0.583997    | Copy gain    |
| BGC823 | chr3 | 47014101 | 47021800 | -0.104903   | Copy neutral |
| BGC823 | chr3 | 47021801 | 47077800 | 0.611997    | Copy gain    |
| BGC823 | chr3 | 47077801 | 47787600 | 0.433797    | Copy neutral |
| BGC823 | chr3 | 47787601 | 47856200 | 0.100897    | Copy neutral |
| BGC823 | chr3 | 47856201 | 48079500 | 0.503197    | Copy gain    |
| BGC823 | chr3 | 48079501 | 48297200 | 0.351797    | Copy neutral |
| BGC823 | chr3 | 48297201 | 48521200 | 0.563697    | Copy gain    |
| BGC823 | chr3 | 48521201 | 48537300 | -0.0870026  | Copy neutral |
| BGC823 | chr3 | 48537301 | 48812400 | 0.484597    | Copy gain    |
| BGC823 | chr3 | 48812401 | 48980400 | 0.225497    | Copy neutral |
| BGC823 | chr3 | 48980401 | 49070700 | 0.465597    | Copy gain    |
| BGC823 | chr3 | 49070701 | 49135100 | 0.174497    | Copy neutral |
| BGC823 | chr3 | 49135101 | 49183400 | 0.612897    | Copy gain    |
| BGC823 | chr3 | 49183401 | 49186900 | -0.601403   | Copy loss    |
| BGC823 | chr3 | 49186901 | 49231000 | 0.526797    | Copy gain    |
| BGC823 | chr3 | 49231001 | 49249900 | -0.00960263 | Copy neutral |
| BGC823 | chr3 | 49249901 | 49258300 | 0.487897    | Copy gain    |
| BGC823 | chr3 | 49258301 | 49270900 | 0.874997    | Copy gain    |
| BGC823 | chr3 | 49270901 | 49386400 | 0.329097    | Copy neutral |
| BGC823 | chr3 | 49386401 | 49417900 | 0.775997    | Copy gain    |
| BGC823 | chr3 | 49417901 | 49450100 | 0.223997    | Copy neutral |
| BGC823 | chr3 | 49450101 | 49464100 | 0.798497    | Copy gain    |
| BGC823 | chr3 | 49464101 | 49491400 | 0.219697    | Copy neutral |
| BGC823 | chr3 | 49491401 | 49501200 | 0.912397    | Copy gain    |
| BGC823 | chr3 | 49501201 | 49518700 | 0.365597    | Copy neutral |
| BGC823 | chr3 | 49518701 | 49574700 | 0.889797    | Copy gain    |
| BGC823 | chr3 | 49574701 | 49975100 | 0.481997    | Copy gain    |
| BGC823 | chr3 | 49975101 | 50001000 | -0.0468026  | Copy neutral |
| BGC823 | chr3 | 50001001 | 50341200 | 0.458997    | Copy gain    |
| BGC823 | chr3 | 50341201 | 50351000 | -0.538803   | Copy loss    |
| BGC823 | chr3 | 50351001 | 50423800 | 0.444397    | Copy neutral |
| BGC823 | chr3 | 50423801 | 60122300 | 0.552797    | Copy gain    |
| BGC823 | chr3 | 60122301 | 60244100 | -0.192703   | Copy neutral |
| BGC823 | chr3 | 60244101 | 60273500 | -1.1562     | Copy loss    |
| BGC823 | chr3 | 60273501 | 60277700 | -8.1169     | Copy loss    |
| BGC823 | chr3 | 60277701 | 60281900 | -1.1074     | Copy loss    |
| BGC823 | chr3 | 60281901 | 60321100 | -0.223603   | Copy neutral |
| BGC823 | chr3 | 60321101 | 60372200 | -1.0694     | Copy loss    |
| BGC823 | chr3 | 60372201 | 60522700 | -0.0784026  | Copy neutral |
| BGC823 | chr3 | 60522701 | 60659900 | -1.1668     | Copy loss    |
| BGC823 | chr3 | 60659901 | 60670400 | -0.0163026  | Copy neutral |
| BGC823 | chr3 | 60670401 | 60734100 | 0.461597    | Copy gain    |
| BGC823 | chr3 | 60734101 | 61042800 | -1.188      | Copy loss    |

|        |      |           |           |             |              |
|--------|------|-----------|-----------|-------------|--------------|
| BGC823 | chr3 | 61042801  | 61069400  | -0.129903   | Copy neutral |
| BGC823 | chr3 | 61069401  | 61126100  | -0.0427026  | Copy neutral |
| BGC823 | chr3 | 61126101  | 61198550  | 0.498497    | Copy gain    |
| BGC823 | chr3 | 61198551  | 61202400  | 1.0469      | Copy gain    |
| BGC823 | chr3 | 61202401  | 61222000  | 0.611097    | Copy gain    |
| BGC823 | chr3 | 61222001  | 61492900  | 0.874197    | Copy gain    |
| BGC823 | chr3 | 61492901  | 61545400  | 0.255797    | Copy neutral |
| BGC823 | chr3 | 61545401  | 61549600  | -0.404903   | Copy neutral |
| BGC823 | chr3 | 61549601  | 61870200  | 0.367897    | Copy neutral |
| BGC823 | chr3 | 61870201  | 61958400  | -0.188903   | Copy neutral |
| BGC823 | chr3 | 61958401  | 62353200  | 0.422597    | Copy neutral |
| BGC823 | chr3 | 62353201  | 62364400  | -0.158403   | Copy neutral |
| BGC823 | chr3 | 62364401  | 62844600  | 0.433897    | Copy neutral |
| BGC823 | chr3 | 62844601  | 62850200  | -1.0374     | Copy loss    |
| BGC823 | chr3 | 62850201  | 65941400  | 0.503997    | Copy gain    |
| BGC823 | chr3 | 65941401  | 66170271  | 0.978597    | Copy gain    |
| BGC823 | chr3 | 66270270  | 66461500  | 0.978597    | Copy gain    |
| BGC823 | chr3 | 66461501  | 75679100  | 0.507197    | Copy gain    |
| BGC823 | chr3 | 75679101  | 75692400  | 2.2011      | Copy gain    |
| BGC823 | chr3 | 75692401  | 75700100  | 3.3072      | Copy gain    |
| BGC823 | chr3 | 75700101  | 75728100  | 2.1381      | Copy gain    |
| BGC823 | chr3 | 75728101  | 75756100  | 2.9351      | Copy gain    |
| BGC823 | chr3 | 75756101  | 75793900  | 2.0482      | Copy gain    |
| BGC823 | chr3 | 75793901  | 90122200  | 0.533597    | Copy gain    |
| BGC823 | chr3 | 90122201  | 90418300  | 0.910497    | Copy gain    |
| BGC823 | chr3 | 90418301  | 90504855  | 1.0663      | Copy gain    |
| BGC823 | chr3 | 93504854  | 93559900  | 1.0663      | Copy gain    |
| BGC823 | chr3 | 93559901  | 95007500  | 0.907297    | Copy gain    |
| BGC823 | chr3 | 95007501  | 96338200  | 0.491297    | Copy gain    |
| BGC823 | chr3 | 96338201  | 96339600  | -4.783      | Copy loss    |
| BGC823 | chr3 | 96339601  | 97547100  | 0.553197    | Copy gain    |
| BGC823 | chr3 | 97547101  | 98408100  | 0.0133974   | Copy neutral |
| BGC823 | chr3 | 98408101  | 98452900  | -0.316803   | Copy neutral |
| BGC823 | chr3 | 98452901  | 98899500  | 0.0294974   | Copy neutral |
| BGC823 | chr3 | 98899501  | 98902300  | -8.3671     | Copy loss    |
| BGC823 | chr3 | 98902301  | 98944300  | 0.0142974   | Copy neutral |
| BGC823 | chr3 | 98944301  | 98949200  | -8.3671     | Copy loss    |
| BGC823 | chr3 | 98949201  | 99231300  | 0.0119974   | Copy neutral |
| BGC823 | chr3 | 99231301  | 99606500  | 0.605297    | Copy gain    |
| BGC823 | chr3 | 99606501  | 100074100 | -0.00640263 | Copy neutral |
| BGC823 | chr3 | 100074101 | 107038400 | 0.584097    | Copy gain    |
| BGC823 | chr3 | 107038401 | 107039800 | -8.3671     | Copy loss    |
| BGC823 | chr3 | 107039801 | 107044000 | 0.187297    | Copy neutral |
| BGC823 | chr3 | 107044001 | 108465000 | 0.557397    | Copy gain    |
| BGC823 | chr3 | 108465001 | 108990000 | 0.448797    | Copy neutral |
| BGC823 | chr3 | 108990001 | 109103400 | 0.107197    | Copy neutral |
| BGC823 | chr3 | 109103401 | 109104800 | -7.9917     | Copy loss    |
| BGC823 | chr3 | 109104801 | 109144000 | 0.167497    | Copy neutral |
| BGC823 | chr3 | 109144001 | 110935300 | 0.564297    | Copy gain    |
| BGC823 | chr3 | 110935301 | 110993400 | 0.0779974   | Copy neutral |
| BGC823 | chr3 | 110993401 | 112050400 | 0.658397    | Copy gain    |
| BGC823 | chr3 | 112050401 | 112052500 | -0.682503   | Copy loss    |



|        |      |           |           |           |              |
|--------|------|-----------|-----------|-----------|--------------|
| BGC823 | chr3 | 112052501 | 112345800 | 0.575297  | Copy gain    |
| BGC823 | chr3 | 112345801 | 112704200 | 0.705897  | Copy gain    |
| BGC823 | chr3 | 112704201 | 113230600 | 0.598697  | Copy gain    |
| BGC823 | chr3 | 113230601 | 113891400 | 0.514797  | Copy gain    |
| BGC823 | chr3 | 113891401 | 114865100 | 0.625197  | Copy gain    |
| BGC823 | chr3 | 114865101 | 114867200 | -0.571403 | Copy loss    |
| BGC823 | chr3 | 114867201 | 115247650 | 0.627397  | Copy gain    |
| BGC823 | chr3 | 115247651 | 115249400 | -8.3671   | Copy loss    |
| BGC823 | chr3 | 115249401 | 115761100 | 0.585897  | Copy gain    |
| BGC823 | chr3 | 115761101 | 118573000 | 0.494897  | Copy gain    |
| BGC823 | chr3 | 118573001 | 119010500 | 0.605297  | Copy gain    |
| BGC823 | chr3 | 119010501 | 119445200 | 0.513897  | Copy gain    |
| BGC823 | chr3 | 119445201 | 120162000 | 0.637797  | Copy gain    |
| BGC823 | chr3 | 120162001 | 120164800 | -8.3671   | Copy loss    |
| BGC823 | chr3 | 120164801 | 121209200 | 0.634897  | Copy gain    |
| BGC823 | chr3 | 121209201 | 121308600 | 0.258297  | Copy neutral |
| BGC823 | chr3 | 121308601 | 123356800 | 0.578297  | Copy gain    |
| BGC823 | chr3 | 123356801 | 124251400 | 0.684497  | Copy gain    |
| BGC823 | chr3 | 124251401 | 125132000 | 0.566497  | Copy gain    |
| BGC823 | chr3 | 125132001 | 125324500 | 0.378397  | Copy neutral |
| BGC823 | chr3 | 125324501 | 128198000 | 0.589497  | Copy gain    |
| BGC823 | chr3 | 128198001 | 128212000 | 0.0214974 | Copy neutral |
| BGC823 | chr3 | 128212001 | 128262400 | 0.639897  | Copy gain    |
| BGC823 | chr3 | 128262401 | 128328900 | 0.412797  | Copy neutral |
| BGC823 | chr3 | 128328901 | 128346400 | 0.687997  | Copy gain    |
| BGC823 | chr3 | 128346401 | 128418500 | 0.178797  | Copy neutral |
| BGC823 | chr3 | 128418501 | 128853900 | 0.493097  | Copy gain    |
| BGC823 | chr3 | 128853901 | 128944900 | 0.231197  | Copy neutral |
| BGC823 | chr3 | 128944901 | 129075800 | 0.492997  | Copy gain    |
| BGC823 | chr3 | 129075801 | 129081400 | -8.2599   | Copy loss    |
| BGC823 | chr3 | 129081401 | 133396900 | 0.558397  | Copy gain    |
| BGC823 | chr3 | 133396901 | 135850400 | 0.622197  | Copy gain    |
| BGC823 | chr3 | 135850401 | 135872100 | 0.535397  | Copy gain    |
| BGC823 | chr3 | 135872101 | 135923900 | 0.219297  | Copy neutral |
| BGC823 | chr3 | 135923901 | 135968000 | 0.549797  | Copy gain    |
| BGC823 | chr3 | 135968001 | 135989000 | 0.230997  | Copy neutral |
| BGC823 | chr3 | 135989001 | 136021200 | 0.703497  | Copy gain    |
| BGC823 | chr3 | 136021201 | 136026100 | -8.1526   | Copy loss    |
| BGC823 | chr3 | 136026101 | 136594500 | 0.482697  | Copy gain    |
| BGC823 | chr3 | 136594501 | 137026400 | 0.628197  | Copy gain    |
| BGC823 | chr3 | 137026401 | 137030600 | -0.225003 | Copy neutral |
| BGC823 | chr3 | 137030601 | 137043900 | -8.1012   | Copy loss    |
| BGC823 | chr3 | 137043901 | 137478250 | 0.636297  | Copy gain    |
| BGC823 | chr3 | 137478251 | 137491200 | 0.0389974 | Copy neutral |
| BGC823 | chr3 | 137491201 | 137860800 | 0.639697  | Copy gain    |
| BGC823 | chr3 | 137860801 | 137921000 | 0.365897  | Copy neutral |
| BGC823 | chr3 | 137921001 | 138311600 | 0.601797  | Copy gain    |
| BGC823 | chr3 | 138311601 | 138497800 | 0.477797  | Copy gain    |
| BGC823 | chr3 | 138497801 | 138666500 | 0.172697  | Copy neutral |
| BGC823 | chr3 | 138666501 | 138833800 | 0.599697  | Copy gain    |
| BGC823 | chr3 | 138833801 | 138835200 | -8.3671   | Copy loss    |
| BGC823 | chr3 | 138835201 | 141402800 | 0.611697  | Copy gain    |

|        |      |           |           |            |              |
|--------|------|-----------|-----------|------------|--------------|
| BGC823 | chr3 | 141402801 | 141404200 | -5.5005    | Copy loss    |
| BGC823 | chr3 | 141404201 | 146385400 | 0.504197   | Copy gain    |
| BGC823 | chr3 | 146385401 | 146390300 | -8.3671    | Copy loss    |
| BGC823 | chr3 | 146390301 | 147086800 | 0.474797   | Copy gain    |
| BGC823 | chr3 | 147086801 | 147142800 | 0.0125974  | Copy neutral |
| BGC823 | chr3 | 147142801 | 148411200 | 0.495597   | Copy gain    |
| BGC823 | chr3 | 148411201 | 148412600 | -8.3671    | Copy loss    |
| BGC823 | chr3 | 148412601 | 148774500 | 0.568597   | Copy gain    |
| BGC823 | chr3 | 148774501 | 148827700 | 0.358097   | Copy neutral |
| BGC823 | chr3 | 148827701 | 149226000 | 0.639697   | Copy gain    |
| BGC823 | chr3 | 149226001 | 149397500 | 0.504297   | Copy gain    |
| BGC823 | chr3 | 149397501 | 150229800 | 0.639997   | Copy gain    |
| BGC823 | chr3 | 150229801 | 150933300 | 0.520097   | Copy gain    |
| BGC823 | chr3 | 150933301 | 152605600 | 0.603897   | Copy gain    |
| BGC823 | chr3 | 152605601 | 152912900 | 0.390997   | Copy neutral |
| BGC823 | chr3 | 152912901 | 155444100 | 0.524897   | Copy gain    |
| BGC823 | chr3 | 155444101 | 155681400 | 0.376997   | Copy neutral |
| BGC823 | chr3 | 155681401 | 156092300 | 0.578897   | Copy gain    |
| BGC823 | chr3 | 156092301 | 156093700 | -7.9917    | Copy loss    |
| BGC823 | chr3 | 156093701 | 157811500 | 0.600097   | Copy gain    |
| BGC823 | chr3 | 157811501 | 157828300 | 0.155797   | Copy neutral |
| BGC823 | chr3 | 157828301 | 158287500 | 0.606597   | Copy gain    |
| BGC823 | chr3 | 158287501 | 158292400 | -0.0655026 | Copy neutral |
| BGC823 | chr3 | 158292401 | 158350500 | 0.510197   | Copy gain    |
| BGC823 | chr3 | 158350501 | 158351900 | -4.9691    | Copy loss    |
| BGC823 | chr3 | 158351901 | 158451300 | 0.436997   | Copy neutral |
| BGC823 | chr3 | 158451301 | 159103700 | 0.604997   | Copy gain    |
| BGC823 | chr3 | 159103701 | 159437600 | 0.697197   | Copy gain    |
| BGC823 | chr3 | 159437601 | 159679800 | 0.578997   | Copy gain    |
| BGC823 | chr3 | 159679801 | 159791100 | 0.416097   | Copy neutral |
| BGC823 | chr3 | 159791101 | 160843200 | 0.551097   | Copy gain    |
| BGC823 | chr3 | 160843201 | 162512000 | 0.461997   | Copy gain    |
| BGC823 | chr3 | 162512001 | 162626100 | -8.2872    | Copy loss    |
| BGC823 | chr3 | 162626101 | 162712900 | 0.451897   | Copy gain    |
| BGC823 | chr3 | 162712901 | 162738100 | -0.0565026 | Copy neutral |
| BGC823 | chr3 | 162738101 | 162765400 | 0.387497   | Copy neutral |
| BGC823 | chr3 | 162765401 | 162768900 | -8.3671    | Copy loss    |
| BGC823 | chr3 | 162768901 | 163659300 | 0.474797   | Copy gain    |
| BGC823 | chr3 | 163659301 | 163664900 | -7.6847    | Copy loss    |
| BGC823 | chr3 | 163664901 | 167471500 | 0.498897   | Copy gain    |
| BGC823 | chr3 | 167471501 | 167535200 | 1.6762     | Copy gain    |
| BGC823 | chr3 | 167535201 | 168863800 | 1.4404     | Copy gain    |
| BGC823 | chr3 | 168863801 | 168868000 | 0.616597   | Copy gain    |
| BGC823 | chr3 | 168868001 | 169376200 | 1.4805     | Copy gain    |
| BGC823 | chr3 | 169376201 | 169387400 | 0.781297   | Copy gain    |
| BGC823 | chr3 | 169387401 | 169834000 | 1.4229     | Copy gain    |
| BGC823 | chr3 | 169834001 | 170172100 | 1.3027     | Copy gain    |
| BGC823 | chr3 | 170172101 | 170198000 | 1.4744     | Copy gain    |
| BGC823 | chr3 | 170198001 | 170386300 | 1.5851     | Copy gain    |
| BGC823 | chr3 | 170386301 | 170388400 | 0.490397   | Copy gain    |
| BGC823 | chr3 | 170388401 | 171219300 | -0.0217026 | Copy neutral |
| BGC823 | chr3 | 171219301 | 173245100 | 0.0336974  | Copy neutral |

|        |      |           |           |             |              |
|--------|------|-----------|-----------|-------------|--------------|
| BGC823 | chr3 | 173245101 | 176469300 | -0.0310026  | Copy neutral |
| BGC823 | chr3 | 176469301 | 176470700 | -2.2021     | Copy loss    |
| BGC823 | chr3 | 176470701 | 176852200 | -0.00630263 | Copy neutral |
| BGC823 | chr3 | 176852201 | 177087400 | -0.258403   | Copy neutral |
| BGC823 | chr3 | 177087401 | 177294600 | -0.0232026  | Copy neutral |
| BGC823 | chr3 | 177294601 | 177297400 | -8.3671     | Copy loss    |
| BGC823 | chr3 | 177297401 | 177380700 | 0.0458974   | Copy neutral |
| BGC823 | chr3 | 177380701 | 177384900 | -6.6812     | Copy loss    |
| BGC823 | chr3 | 177384901 | 178705100 | 0.0189974   | Copy neutral |
| BGC823 | chr3 | 178705101 | 178959900 | -0.0667026  | Copy neutral |
| BGC823 | chr3 | 178959901 | 179549300 | -0.162003   | Copy neutral |
| BGC823 | chr3 | 179549301 | 180590200 | -0.0425026  | Copy neutral |
| BGC823 | chr3 | 180590201 | 180662300 | -0.402603   | Copy neutral |
| BGC823 | chr3 | 180662301 | 181413400 | -0.0715026  | Copy neutral |
| BGC823 | chr3 | 181413401 | 181442100 | -0.502403   | Copy loss    |
| BGC823 | chr3 | 181442101 | 181444900 | -1.3048     | Copy loss    |
| BGC823 | chr3 | 181444901 | 181505100 | -0.321303   | Copy neutral |
| BGC823 | chr3 | 181505101 | 181524000 | -1.3408     | Copy loss    |
| BGC823 | chr3 | 181524001 | 181627600 | -1.7478     | Copy loss    |
| BGC823 | chr3 | 181627601 | 181880300 | -1.1518     | Copy loss    |
| BGC823 | chr3 | 181880301 | 181941200 | -0.0640026  | Copy neutral |
| BGC823 | chr3 | 181941201 | 181948200 | -0.802003   | Copy loss    |
| BGC823 | chr3 | 181948201 | 182682500 | -0.0252026  | Copy neutral |
| BGC823 | chr3 | 182682501 | 184471000 | -0.143403   | Copy neutral |
| BGC823 | chr3 | 184471001 | 184472400 | -2.6016     | Copy loss    |
| BGC823 | chr3 | 184472401 | 185241000 | -0.0583026  | Copy neutral |
| BGC823 | chr3 | 185241001 | 185355100 | -0.384203   | Copy neutral |
| BGC823 | chr3 | 185355101 | 185757600 | -0.131603   | Copy neutral |
| BGC823 | chr3 | 185757601 | 186433100 | -0.0200026  | Copy neutral |
| BGC823 | chr3 | 186433101 | 186752300 | -0.151003   | Copy neutral |
| BGC823 | chr3 | 186752301 | 187454400 | 0.0490974   | Copy neutral |
| BGC823 | chr3 | 187454401 | 187464900 | -0.812303   | Copy loss    |
| BGC823 | chr3 | 187464901 | 187733000 | 0.100997    | Copy neutral |
| BGC823 | chr3 | 187733001 | 187734400 | -8.3671     | Copy loss    |
| BGC823 | chr3 | 187734401 | 188670300 | 0.0332974   | Copy neutral |
| BGC823 | chr3 | 188670301 | 189432600 | 0.134697    | Copy neutral |
| BGC823 | chr3 | 189432601 | 189632800 | 0.0433974   | Copy neutral |
| BGC823 | chr3 | 189632801 | 189662200 | 1.0636      | Copy gain    |
| BGC823 | chr3 | 189662201 | 190839600 | 0.0554974   | Copy neutral |
| BGC823 | chr3 | 190839601 | 191135700 | -0.108403   | Copy neutral |
| BGC823 | chr3 | 191135701 | 192536400 | 0.00459737  | Copy neutral |
| BGC823 | chr3 | 192536401 | 192668000 | -0.200903   | Copy neutral |
| BGC823 | chr3 | 192668001 | 192875900 | 0.0182974   | Copy neutral |
| BGC823 | chr3 | 192875901 | 192885000 | -8.3671     | Copy loss    |
| BGC823 | chr3 | 192885001 | 194041962 | -0.0966026  | Copy neutral |
| BGC823 | chr3 | 194047251 | 197843100 | -0.0966026  | Copy neutral |
| BGC823 | chr3 | 197843101 | 197962431 | 0.902197    | Copy gain    |
| BGC823 | chr3 | 198022430 | 198022430 | 0.902197    | Copy gain    |
| BGC823 | chr4 | 10000     | 14000     | -4.1996     | Copy loss    |
| BGC823 | chr4 | 14001     | 68600     | 2.5854      | Copy gain    |
| BGC823 | chr4 | 68601     | 1423147   | -0.126303   | Copy neutral |
| BGC823 | chr4 | 1478646   | 1924300   | -0.126303   | Copy neutral |

|        |      |          |          |             |              |
|--------|------|----------|----------|-------------|--------------|
| BGC823 | chr4 | 1924301  | 1941100  | -1.4107     | Copy loss    |
| BGC823 | chr4 | 1941101  | 3568600  | -0.105703   | Copy neutral |
| BGC823 | chr4 | 3568601  | 3615150  | 0.773397    | Copy gain    |
| BGC823 | chr4 | 3615151  | 3619700  | -0.268303   | Copy neutral |
| BGC823 | chr4 | 3619701  | 3635800  | 0.722197    | Copy gain    |
| BGC823 | chr4 | 3635801  | 8799204  | -0.0481026  | Copy neutral |
| BGC823 | chr4 | 8818203  | 9158800  | -0.0481026  | Copy neutral |
| BGC823 | chr4 | 9158801  | 9173500  | -5.6251     | Copy loss    |
| BGC823 | chr4 | 9173501  | 9200100  | -2.8965     | Copy loss    |
| BGC823 | chr4 | 9200101  | 9274643  | -6.0831     | Copy loss    |
| BGC823 | chr4 | 9324642  | 9457700  | -0.116303   | Copy neutral |
| BGC823 | chr4 | 9457701  | 9481500  | -8.058      | Copy loss    |
| BGC823 | chr4 | 9481501  | 14924000 | -0.0441026  | Copy neutral |
| BGC823 | chr4 | 14924001 | 14925400 | -8.3671     | Copy loss    |
| BGC823 | chr4 | 14925401 | 16727200 | 0.0407974   | Copy neutral |
| BGC823 | chr4 | 16727201 | 16919000 | -0.157203   | Copy neutral |
| BGC823 | chr4 | 16919001 | 16923900 | -0.991803   | Copy loss    |
| BGC823 | chr4 | 16923901 | 17518900 | -0.124603   | Copy neutral |
| BGC823 | chr4 | 17518901 | 17663100 | -0.324503   | Copy neutral |
| BGC823 | chr4 | 17663101 | 17824100 | -0.120503   | Copy neutral |
| BGC823 | chr4 | 17824101 | 17988600 | 0.0429974   | Copy neutral |
| BGC823 | chr4 | 17988601 | 20416200 | -0.00620263 | Copy neutral |
| BGC823 | chr4 | 20416201 | 21513800 | -0.0766026  | Copy neutral |
| BGC823 | chr4 | 21513801 | 22695400 | 0.00449737  | Copy neutral |
| BGC823 | chr4 | 22695401 | 23709700 | 0.0989974   | Copy neutral |
| BGC823 | chr4 | 23709701 | 23724400 | -0.400303   | Copy neutral |
| BGC823 | chr4 | 23724401 | 24129700 | 0.0772974   | Copy neutral |
| BGC823 | chr4 | 24129701 | 24471300 | 0.671997    | Copy gain    |
| BGC823 | chr4 | 24471301 | 24475500 | -0.190803   | Copy neutral |
| BGC823 | chr4 | 24475501 | 24532200 | 0.594597    | Copy gain    |
| BGC823 | chr4 | 24532201 | 25429600 | -0.0566026  | Copy neutral |
| BGC823 | chr4 | 25429601 | 25512900 | -0.214803   | Copy neutral |
| BGC823 | chr4 | 25512901 | 25760700 | -0.398703   | Copy neutral |
| BGC823 | chr4 | 25760701 | 26215700 | -0.146803   | Copy neutral |
| BGC823 | chr4 | 26215701 | 26217100 | -4.9839     | Copy loss    |
| BGC823 | chr4 | 26217101 | 26369000 | -0.313503   | Copy neutral |
| BGC823 | chr4 | 26369001 | 31820918 | -0.0495026  | Copy neutral |
| BGC823 | chr4 | 31837417 | 32834639 | -0.0495026  | Copy neutral |
| BGC823 | chr4 | 32840638 | 32841900 | -8.3671     | Copy loss    |
| BGC823 | chr4 | 32841901 | 35495600 | -0.00260263 | Copy neutral |
| BGC823 | chr4 | 35495601 | 35497000 | -5.2855     | Copy loss    |
| BGC823 | chr4 | 35497001 | 35703500 | -0.00600263 | Copy neutral |
| BGC823 | chr4 | 35703501 | 36442000 | 0.0687974   | Copy neutral |
| BGC823 | chr4 | 36442001 | 38264100 | -0.0358026  | Copy neutral |
| BGC823 | chr4 | 38264101 | 38265500 | -6.7496     | Copy loss    |
| BGC823 | chr4 | 38265501 | 39345600 | -0.0280026  | Copy neutral |
| BGC823 | chr4 | 39345601 | 40095300 | -0.285803   | Copy neutral |
| BGC823 | chr4 | 40095301 | 40296397 | -0.129003   | Copy neutral |
| BGC823 | chr4 | 40297096 | 40495700 | -0.129003   | Copy neutral |
| BGC823 | chr4 | 40495701 | 40763100 | -0.283703   | Copy neutral |
| BGC823 | chr4 | 40763101 | 42763000 | -0.00190263 | Copy neutral |
| BGC823 | chr4 | 42763001 | 42769300 | -8.2837     | Copy loss    |

|        |      |          |           |             |              |
|--------|------|----------|-----------|-------------|--------------|
| BGC823 | chr4 | 42769301 | 43269800  | 0.0158974   | Copy neutral |
| BGC823 | chr4 | 43269801 | 43272600  | -1.4188     | Copy loss    |
| BGC823 | chr4 | 43272601 | 43453200  | -0.0510026  | Copy neutral |
| BGC823 | chr4 | 43453201 | 43454600  | -8.3671     | Copy loss    |
| BGC823 | chr4 | 43454601 | 45013500  | -0.0495026  | Copy neutral |
| BGC823 | chr4 | 45013501 | 46202800  | 0.0215974   | Copy neutral |
| BGC823 | chr4 | 46202801 | 46204900  | -8.3671     | Copy loss    |
| BGC823 | chr4 | 46204901 | 49093100  | -0.0187026  | Copy neutral |
| BGC823 | chr4 | 49093101 | 49158900  | 5.15        | Copy gain    |
| BGC823 | chr4 | 49158901 | 49170100  | 2.4462      | Copy gain    |
| BGC823 | chr4 | 49170101 | 49185500  | 1.9355      | Copy gain    |
| BGC823 | chr4 | 49185501 | 49193200  | 0.625397    | Copy gain    |
| BGC823 | chr4 | 49193201 | 49226800  | 1.8819      | Copy gain    |
| BGC823 | chr4 | 49226801 | 49259000  | 1.4858      | Copy gain    |
| BGC823 | chr4 | 49259001 | 49265650  | 2.3096      | Copy gain    |
| BGC823 | chr4 | 49265651 | 49338942  | 3.2618      | Copy gain    |
| BGC823 | chr4 | 49488941 | 49511350  | 0.776497    | Copy gain    |
| BGC823 | chr4 | 49511351 | 49518000  | 4.8579      | Copy gain    |
| BGC823 | chr4 | 49518001 | 49523950  | 0.349697    | Copy neutral |
| BGC823 | chr4 | 49523951 | 49538300  | 1.9042      | Copy gain    |
| BGC823 | chr4 | 49538301 | 49634200  | 0.819497    | Copy gain    |
| BGC823 | chr4 | 49634201 | 49660118  | 3.351       | Copy gain    |
| BGC823 | chr4 | 52660117 | 52671850  | 3.351       | Copy gain    |
| BGC823 | chr4 | 52671851 | 55192200  | -0.0697026  | Copy neutral |
| BGC823 | chr4 | 55192201 | 55225800  | -1.1655     | Copy loss    |
| BGC823 | chr4 | 55225801 | 55591900  | -0.121803   | Copy neutral |
| BGC823 | chr4 | 55591901 | 57149400  | -0.0258026  | Copy neutral |
| BGC823 | chr4 | 57149401 | 57593900  | -0.157903   | Copy neutral |
| BGC823 | chr4 | 57593901 | 57883000  | -0.371103   | Copy neutral |
| BGC823 | chr4 | 57883001 | 57982400  | -0.0743026  | Copy neutral |
| BGC823 | chr4 | 57982401 | 58802800  | 0.0293974   | Copy neutral |
| BGC823 | chr4 | 58802801 | 59739334  | -0.0597026  | Copy neutral |
| BGC823 | chr4 | 59789333 | 61330500  | -0.0597026  | Copy neutral |
| BGC823 | chr4 | 61330501 | 61331900  | -8.3671     | Copy loss    |
| BGC823 | chr4 | 61331901 | 61333300  | -1.9285     | Copy loss    |
| BGC823 | chr4 | 61333301 | 63669900  | -0.101603   | Copy neutral |
| BGC823 | chr4 | 63669901 | 63675500  | -8.3671     | Copy loss    |
| BGC823 | chr4 | 63675501 | 64714300  | -0.0523026  | Copy neutral |
| BGC823 | chr4 | 64714301 | 64715700  | -8.3671     | Copy loss    |
| BGC823 | chr4 | 64715701 | 64918700  | -0.0192026  | Copy neutral |
| BGC823 | chr4 | 64918701 | 64920100  | -2.4828     | Copy loss    |
| BGC823 | chr4 | 64920101 | 68264000  | 0.0273974   | Copy neutral |
| BGC823 | chr4 | 68264001 | 68266100  | 5.5844      | Copy gain    |
| BGC823 | chr4 | 68266101 | 71486800  | -0.00590263 | Copy neutral |
| BGC823 | chr4 | 71486801 | 71488200  | -8.3671     | Copy loss    |
| BGC823 | chr4 | 71488201 | 74200000  | -0.0761026  | Copy neutral |
| BGC823 | chr4 | 74200001 | 75426400  | 0.100797    | Copy neutral |
| BGC823 | chr4 | 75426401 | 75427380  | -5.0616     | Copy loss    |
| BGC823 | chr4 | 75452279 | 75492550  | -5.0616     | Copy loss    |
| BGC823 | chr4 | 75492551 | 86571100  | -0.0150026  | Copy neutral |
| BGC823 | chr4 | 86571101 | 86572500  | -5.0194     | Copy loss    |
| BGC823 | chr4 | 86572501 | 108777900 | 0.00299737  | Copy neutral |

|        |      |           |           |              |              |
|--------|------|-----------|-----------|--------------|--------------|
| BGC823 | chr4 | 108777901 | 115175200 | -0.0701026   | Copy neutral |
| BGC823 | chr4 | 115175201 | 115183600 | -8.0958      | Copy loss    |
| BGC823 | chr4 | 115183601 | 115929100 | -0.0677026   | Copy neutral |
| BGC823 | chr4 | 115929101 | 115931900 | -7.8262      | Copy loss    |
| BGC823 | chr4 | 115931901 | 119126000 | -0.0505026   | Copy neutral |
| BGC823 | chr4 | 119126001 | 119129500 | -8.217       | Copy loss    |
| BGC823 | chr4 | 119129501 | 119337400 | -0.124903    | Copy neutral |
| BGC823 | chr4 | 119337401 | 119481600 | 0.168897     | Copy neutral |
| BGC823 | chr4 | 119481601 | 120963500 | -0.0322026   | Copy neutral |
| BGC823 | chr4 | 120963501 | 120964900 | -8.3671      | Copy loss    |
| BGC823 | chr4 | 120964901 | 128854600 | 0.0209974    | Copy neutral |
| BGC823 | chr4 | 128854601 | 129042200 | -0.324003    | Copy neutral |
| BGC823 | chr4 | 129042201 | 129243100 | -0.000602632 | Copy neutral |
| BGC823 | chr4 | 129243101 | 129465700 | 0.145997     | Copy neutral |
| BGC823 | chr4 | 129465701 | 129542000 | -0.0620026   | Copy neutral |
| BGC823 | chr4 | 129542001 | 129546200 | -0.783003    | Copy loss    |
| BGC823 | chr4 | 129546201 | 129593100 | -0.0138026   | Copy neutral |
| BGC823 | chr4 | 129593101 | 129758300 | -0.279103    | Copy neutral |
| BGC823 | chr4 | 129758301 | 130066300 | 0.0581974    | Copy neutral |
| BGC823 | chr4 | 130066301 | 130068400 | -8.3671      | Copy loss    |
| BGC823 | chr4 | 130068401 | 132577200 | -0.0425026   | Copy neutral |
| BGC823 | chr4 | 132577201 | 132636700 | 0.439597     | Copy neutral |
| BGC823 | chr4 | 132636701 | 133181300 | 0.0105974    | Copy neutral |
| BGC823 | chr4 | 133181301 | 133182700 | -8.3671      | Copy loss    |
| BGC823 | chr4 | 133182701 | 134066800 | -0.0345026   | Copy neutral |
| BGC823 | chr4 | 134066801 | 134071700 | -0.838203    | Copy loss    |
| BGC823 | chr4 | 134071701 | 135433200 | -0.00360263  | Copy neutral |
| BGC823 | chr4 | 135433201 | 135435300 | -8.3671      | Copy loss    |
| BGC823 | chr4 | 135435301 | 139830600 | 0.00159737   | Copy neutral |
| BGC823 | chr4 | 139830601 | 140242900 | -0.278603    | Copy neutral |
| BGC823 | chr4 | 140242901 | 141807400 | -0.0167026   | Copy neutral |
| BGC823 | chr4 | 141807401 | 144096400 | 0.0714974    | Copy neutral |
| BGC823 | chr4 | 144096401 | 144149600 | -0.00800263  | Copy neutral |
| BGC823 | chr4 | 144149601 | 144290300 | -0.212703    | Copy neutral |
| BGC823 | chr4 | 144290301 | 145316500 | -0.0183026   | Copy neutral |
| BGC823 | chr4 | 145316501 | 145319300 | -7.9917      | Copy loss    |
| BGC823 | chr4 | 145319301 | 146640200 | -0.0489026   | Copy neutral |
| BGC823 | chr4 | 146640201 | 146862100 | -0.171203    | Copy neutral |
| BGC823 | chr4 | 146862101 | 148572900 | -0.0242026   | Copy neutral |
| BGC823 | chr4 | 148572901 | 148688400 | -0.260103    | Copy neutral |
| BGC823 | chr4 | 148688401 | 149413600 | -0.0470026   | Copy neutral |
| BGC823 | chr4 | 149413601 | 149415350 | -8.3671      | Copy loss    |
| BGC823 | chr4 | 149415351 | 156959600 | -0.0457026   | Copy neutral |
| BGC823 | chr4 | 156959601 | 156973600 | -8.3671      | Copy loss    |
| BGC823 | chr4 | 156973601 | 158144700 | -0.0174026   | Copy neutral |
| BGC823 | chr4 | 158144701 | 158853100 | 0.527997     | Copy gain    |
| BGC823 | chr4 | 158853101 | 163394000 | -0.00920263  | Copy neutral |
| BGC823 | chr4 | 163394001 | 163396100 | -8.3671      | Copy loss    |
| BGC823 | chr4 | 163396101 | 163417800 | -0.246603    | Copy neutral |
| BGC823 | chr4 | 163417801 | 165666200 | -0.0493026   | Copy neutral |
| BGC823 | chr4 | 165666201 | 166002900 | -0.309303    | Copy neutral |
| BGC823 | chr4 | 166002901 | 166005000 | -8.3671      | Copy loss    |

|        |      |           |           |            |              |
|--------|------|-----------|-----------|------------|--------------|
| BGC823 | chr4 | 166005001 | 166045600 | -0.423903  | Copy neutral |
| BGC823 | chr4 | 166045601 | 166130300 | -0.0837026 | Copy neutral |
| BGC823 | chr4 | 166130301 | 167759200 | 0.0634974  | Copy neutral |
| BGC823 | chr4 | 167759201 | 168561400 | -0.0244026 | Copy neutral |
| BGC823 | chr4 | 168561401 | 168949900 | 0.567997   | Copy gain    |
| BGC823 | chr4 | 168949901 | 172375000 | 0.00769737 | Copy neutral |
| BGC823 | chr4 | 172375001 | 172379200 | -8.242     | Copy loss    |
| BGC823 | chr4 | 172379201 | 172988900 | -0.0683026 | Copy neutral |
| BGC823 | chr4 | 172988901 | 172992400 | -8.3671    | Copy loss    |
| BGC823 | chr4 | 172992401 | 174533100 | -0.0211026 | Copy neutral |
| BGC823 | chr4 | 174533101 | 174535900 | -6.4777    | Copy loss    |
| BGC823 | chr4 | 174535901 | 184674000 | -0.0710026 | Copy neutral |
| BGC823 | chr4 | 184674001 | 184675400 | -5.8473    | Copy loss    |
| BGC823 | chr4 | 184675401 | 186441500 | -0.124203  | Copy neutral |
| BGC823 | chr4 | 186441501 | 186443600 | -8.1169    | Copy loss    |
| BGC823 | chr4 | 186443601 | 188346200 | -0.0902026 | Copy neutral |
| BGC823 | chr4 | 188346201 | 188348300 | -8.3671    | Copy loss    |
| BGC823 | chr4 | 188348301 | 188909700 | -0.0442026 | Copy neutral |
| BGC823 | chr4 | 188909701 | 189164500 | -0.338003  | Copy neutral |
| BGC823 | chr4 | 189164501 | 189423500 | -0.103403  | Copy neutral |
| BGC823 | chr4 | 189423501 | 189431200 | 0.655897   | Copy gain    |
| BGC823 | chr4 | 189431201 | 189972300 | -0.0675026 | Copy neutral |
| BGC823 | chr4 | 189972301 | 189973700 | -2.6869    | Copy loss    |
| BGC823 | chr4 | 189973701 | 190153600 | -0.0905026 | Copy neutral |
| BGC823 | chr4 | 190153601 | 190157100 | 3.1942     | Copy gain    |
| BGC823 | chr4 | 190157101 | 190197700 | -0.0147026 | Copy neutral |
| BGC823 | chr4 | 190197701 | 190203300 | 1.4816     | Copy gain    |
| BGC823 | chr4 | 190203301 | 190470000 | -0.120803  | Copy neutral |
| BGC823 | chr4 | 190470001 | 190535100 | 1.5936     | Copy gain    |
| BGC823 | chr4 | 190535101 | 190538600 | -0.118103  | Copy neutral |
| BGC823 | chr4 | 190538601 | 190684900 | 1.524      | Copy gain    |
| BGC823 | chr4 | 190684901 | 190796200 | -0.137903  | Copy neutral |
| BGC823 | chr4 | 190796201 | 190823500 | 1.6239     | Copy gain    |
| BGC823 | chr4 | 190823501 | 190983100 | 0.908697   | Copy gain    |
| BGC823 | chr4 | 190983101 | 191002350 | -2.0086    | Copy loss    |
| BGC823 | chr4 | 191002351 | 191040500 | 2.523      | Copy gain    |
| BGC823 | chr4 | 191040501 | 191044277 | -0.0809026 | Copy neutral |
| BGC823 | chr4 | 191154276 | 191154276 | -0.0809026 | Copy neutral |
| BGC823 | chr5 | 10000     | 1953700   | 1.0838     | Copy gain    |
| BGC823 | chr5 | 1953701   | 1961400   | 1.4684     | Copy gain    |
| BGC823 | chr5 | 1961401   | 3431400   | 1.1252     | Copy gain    |
| BGC823 | chr5 | 3431401   | 3590300   | 1.4835     | Copy gain    |
| BGC823 | chr5 | 3590301   | 3607800   | 0.650197   | Copy gain    |
| BGC823 | chr5 | 3607801   | 4704700   | 1.4535     | Copy gain    |
| BGC823 | chr5 | 4704701   | 6337100   | 1.5735     | Copy gain    |
| BGC823 | chr5 | 6337101   | 6632500   | 1.4723     | Copy gain    |
| BGC823 | chr5 | 6632501   | 6634600   | 0.373797   | Copy neutral |
| BGC823 | chr5 | 6634601   | 6711600   | 1.5106     | Copy gain    |
| BGC823 | chr5 | 6711601   | 6713700   | 0.316997   | Copy neutral |
| BGC823 | chr5 | 6713701   | 6715100   | -4.2231    | Copy loss    |
| BGC823 | chr5 | 6715101   | 6727000   | 0.946397   | Copy gain    |
| BGC823 | chr5 | 6727001   | 6773200   | 1.4797     | Copy gain    |

|        |      |          |          |           |              |
|--------|------|----------|----------|-----------|--------------|
| BGC823 | chr5 | 6773201  | 6775300  | 0.622797  | Copy gain    |
| BGC823 | chr5 | 6775301  | 6784400  | 1.4354    | Copy gain    |
| BGC823 | chr5 | 6784401  | 7187600  | 1.5733    | Copy gain    |
| BGC823 | chr5 | 7187601  | 8597400  | 1.4767    | Copy gain    |
| BGC823 | chr5 | 8597401  | 9544500  | 1.5872    | Copy gain    |
| BGC823 | chr5 | 9544501  | 9548000  | 0.565397  | Copy gain    |
| BGC823 | chr5 | 9548001  | 10279500 | 1.6184    | Copy gain    |
| BGC823 | chr5 | 10279501 | 10666600 | 1.4817    | Copy gain    |
| BGC823 | chr5 | 10666601 | 11314800 | 1.5945    | Copy gain    |
| BGC823 | chr5 | 11314801 | 11816700 | 1.4758    | Copy gain    |
| BGC823 | chr5 | 11816701 | 11818100 | -1.1605   | Copy loss    |
| BGC823 | chr5 | 11818101 | 13140400 | 1.4553    | Copy gain    |
| BGC823 | chr5 | 13140401 | 14142800 | 1.6049    | Copy gain    |
| BGC823 | chr5 | 14142801 | 14145600 | 0.482197  | Copy gain    |
| BGC823 | chr5 | 14145601 | 14346500 | 1.6074    | Copy gain    |
| BGC823 | chr5 | 14346501 | 14349300 | 2.5867    | Copy gain    |
| BGC823 | chr5 | 14349301 | 14581000 | 1.4943    | Copy gain    |
| BGC823 | chr5 | 14581001 | 14583100 | 0.307797  | Copy neutral |
| BGC823 | chr5 | 14583101 | 15023400 | 1.5556    | Copy gain    |
| BGC823 | chr5 | 15023401 | 15154300 | 1.6968    | Copy gain    |
| BGC823 | chr5 | 15154301 | 16658600 | 1.543     | Copy gain    |
| BGC823 | chr5 | 16658601 | 17216500 | 1.3803    | Copy gain    |
| BGC823 | chr5 | 17216501 | 17219300 | 0.320997  | Copy neutral |
| BGC823 | chr5 | 17219301 | 17389400 | 1.5425    | Copy gain    |
| BGC823 | chr5 | 17389401 | 17390800 | -0.628003 | Copy loss    |
| BGC823 | chr5 | 17390801 | 17530658 | 1.5541    | Copy gain    |
| BGC823 | chr5 | 17580657 | 17965500 | 1.5541    | Copy gain    |
| BGC823 | chr5 | 17965501 | 18873400 | 1.4215    | Copy gain    |
| BGC823 | chr5 | 18873401 | 18874800 | -8.3671   | Copy loss    |
| BGC823 | chr5 | 18874801 | 20699000 | 1.3943    | Copy gain    |
| BGC823 | chr5 | 20699001 | 20949600 | 1.5945    | Copy gain    |
| BGC823 | chr5 | 20949601 | 21272300 | 1.3701    | Copy gain    |
| BGC823 | chr5 | 21272301 | 21392700 | 1.5842    | Copy gain    |
| BGC823 | chr5 | 21392701 | 21478450 | 1.339     | Copy gain    |
| BGC823 | chr5 | 21478451 | 21494900 | 4.3493    | Copy gain    |
| BGC823 | chr5 | 21494901 | 21507500 | 1.6465    | Copy gain    |
| BGC823 | chr5 | 21507501 | 21573300 | 1.9773    | Copy gain    |
| BGC823 | chr5 | 21573301 | 21611800 | 1.4148    | Copy gain    |
| BGC823 | chr5 | 21611801 | 21614600 | -8.3671   | Copy loss    |
| BGC823 | chr5 | 21614601 | 27209000 | 1.396     | Copy gain    |
| BGC823 | chr5 | 27209001 | 27314000 | 2.0743    | Copy gain    |
| BGC823 | chr5 | 27314001 | 28186200 | 1.9642    | Copy gain    |
| BGC823 | chr5 | 28186201 | 32546500 | 1.8333    | Copy gain    |
| BGC823 | chr5 | 32546501 | 33838000 | 1.8989    | Copy gain    |
| BGC823 | chr5 | 33838001 | 34178900 | 2.0701    | Copy gain    |
| BGC823 | chr5 | 34178901 | 34204450 | 3.0043    | Copy gain    |
| BGC823 | chr5 | 34204451 | 35325500 | 2.0105    | Copy gain    |
| BGC823 | chr5 | 35325501 | 35710500 | 2.1048    | Copy gain    |
| BGC823 | chr5 | 35710501 | 35716100 | 1.4521    | Copy gain    |
| BGC823 | chr5 | 35716101 | 36241100 | 2.13      | Copy gain    |
| BGC823 | chr5 | 36241101 | 36242500 | 0.457297  | Copy gain    |
| BGC823 | chr5 | 36242501 | 36853600 | 2.1489    | Copy gain    |



|        |      |          |          |           |              |
|--------|------|----------|----------|-----------|--------------|
| BGC823 | chr5 | 36853601 | 36876000 | 1.9818    | Copy gain    |
| BGC823 | chr5 | 36876001 | 36877400 | 0.0784974 | Copy neutral |
| BGC823 | chr5 | 36877401 | 37012500 | 2.0569    | Copy gain    |
| BGC823 | chr5 | 37012501 | 37016000 | 1.247     | Copy gain    |
| BGC823 | chr5 | 37016001 | 37069900 | 1.9046    | Copy gain    |
| BGC823 | chr5 | 37069901 | 37110500 | 2.2123    | Copy gain    |
| BGC823 | chr5 | 37110501 | 37223900 | 2.0142    | Copy gain    |
| BGC823 | chr5 | 37223901 | 37258900 | 1.7946    | Copy gain    |
| BGC823 | chr5 | 37258901 | 37272900 | 2.2755    | Copy gain    |
| BGC823 | chr5 | 37272901 | 37424800 | 1.8255    | Copy gain    |
| BGC823 | chr5 | 37424801 | 37834300 | 2.1062    | Copy gain    |
| BGC823 | chr5 | 37834301 | 37840600 | 1.1608    | Copy gain    |
| BGC823 | chr5 | 37840601 | 39074000 | 2.1616    | Copy gain    |
| BGC823 | chr5 | 39074001 | 39075400 | 0.463997  | Copy gain    |
| BGC823 | chr5 | 39075401 | 40334700 | 2.1225    | Copy gain    |
| BGC823 | chr5 | 40334701 | 40351500 | -7.9743   | Copy loss    |
| BGC823 | chr5 | 40351501 | 40676300 | 2.1681    | Copy gain    |
| BGC823 | chr5 | 40676301 | 40870200 | 1.8029    | Copy gain    |
| BGC823 | chr5 | 40870201 | 42854700 | 1.9086    | Copy gain    |
| BGC823 | chr5 | 42854701 | 42886900 | 2.18      | Copy gain    |
| BGC823 | chr5 | 42886901 | 42942200 | 1.9674    | Copy gain    |
| BGC823 | chr5 | 42942201 | 43243200 | 1.7238    | Copy gain    |
| BGC823 | chr5 | 43243201 | 44235800 | 1.9575    | Copy gain    |
| BGC823 | chr5 | 44235801 | 45371900 | 1.8058    | Copy gain    |
| BGC823 | chr5 | 45371901 | 45376800 | 0.796297  | Copy gain    |
| BGC823 | chr5 | 45376801 | 45939950 | 1.7836    | Copy gain    |
| BGC823 | chr5 | 45939951 | 46000500 | 1.6366    | Copy gain    |
| BGC823 | chr5 | 46000501 | 46010300 | 1.9367    | Copy gain    |
| BGC823 | chr5 | 46010301 | 46106200 | 1.5685    | Copy gain    |
| BGC823 | chr5 | 46106201 | 46195100 | 1.7578    | Copy gain    |
| BGC823 | chr5 | 46195101 | 46198950 | 2.3292    | Copy gain    |
| BGC823 | chr5 | 46198951 | 46206300 | 1.7407    | Copy gain    |
| BGC823 | chr5 | 46206301 | 46270700 | 1.5285    | Copy gain    |
| BGC823 | chr5 | 46270701 | 46275600 | -8.3671   | Copy loss    |
| BGC823 | chr5 | 46275601 | 46313400 | 1.5278    | Copy gain    |
| BGC823 | chr5 | 46313401 | 46405642 | 1.8771    | Copy gain    |
| BGC823 | chr5 | 49405641 | 49441700 | 4.7764    | Copy gain    |
| BGC823 | chr5 | 49441701 | 49468300 | 0.777297  | Copy gain    |
| BGC823 | chr5 | 49468301 | 57323700 | 0.586697  | Copy gain    |
| BGC823 | chr5 | 57323701 | 57333500 | -8.3135   | Copy loss    |
| BGC823 | chr5 | 57333501 | 58330300 | 0.653797  | Copy gain    |
| BGC823 | chr5 | 58330301 | 58365300 | 0.0995974 | Copy neutral |
| BGC823 | chr5 | 58365301 | 58428300 | -1.0458   | Copy loss    |
| BGC823 | chr5 | 58428301 | 58442300 | -8.1779   | Copy loss    |
| BGC823 | chr5 | 58442301 | 58503900 | -1.0334   | Copy loss    |
| BGC823 | chr5 | 58503901 | 58853900 | 0.0972974 | Copy neutral |
| BGC823 | chr5 | 58853901 | 68330500 | 0.570197  | Copy gain    |
| BGC823 | chr5 | 68330501 | 70383600 | 0.292297  | Copy neutral |
| BGC823 | chr5 | 70383601 | 70746200 | 0.796097  | Copy gain    |
| BGC823 | chr5 | 70746201 | 70777000 | 0.120897  | Copy neutral |
| BGC823 | chr5 | 70777001 | 70968100 | 0.436397  | Copy neutral |
| BGC823 | chr5 | 70968101 | 72143400 | 0.644397  | Copy gain    |

|        |      |           |           |            |              |
|--------|------|-----------|-----------|------------|--------------|
| BGC823 | chr5 | 72143401  | 73640700  | 0.557897   | Copy gain    |
| BGC823 | chr5 | 73640701  | 73644900  | 1.1491     | Copy gain    |
| BGC823 | chr5 | 73644901  | 73676400  | 0.619997   | Copy gain    |
| BGC823 | chr5 | 73676401  | 75044900  | 0.503597   | Copy gain    |
| BGC823 | chr5 | 75044901  | 76050800  | 0.606697   | Copy gain    |
| BGC823 | chr5 | 76050801  | 76173300  | 0.371597   | Copy neutral |
| BGC823 | chr5 | 76173301  | 76298600  | 0.542797   | Copy gain    |
| BGC823 | chr5 | 76298601  | 76846700  | 0.678997   | Copy gain    |
| BGC823 | chr5 | 76846701  | 76923700  | 0.594597   | Copy gain    |
| BGC823 | chr5 | 76923701  | 76941900  | 0.0388974  | Copy neutral |
| BGC823 | chr5 | 76941901  | 78378300  | 0.553997   | Copy gain    |
| BGC823 | chr5 | 78378301  | 78586900  | 0.285297   | Copy neutral |
| BGC823 | chr5 | 78586901  | 78861300  | 0.437497   | Copy neutral |
| BGC823 | chr5 | 78861301  | 78932000  | 0.229097   | Copy neutral |
| BGC823 | chr5 | 78932001  | 79515800  | 0.507297   | Copy gain    |
| BGC823 | chr5 | 79515801  | 79646700  | 0.231897   | Copy neutral |
| BGC823 | chr5 | 79646701  | 83876800  | 0.505597   | Copy gain    |
| BGC823 | chr5 | 83876801  | 83948200  | 0.375597   | Copy neutral |
| BGC823 | chr5 | 83948201  | 83954500  | -7.965     | Copy loss    |
| BGC823 | chr5 | 83954501  | 84158900  | 0.436997   | Copy neutral |
| BGC823 | chr5 | 84158901  | 84160300  | -1.6008    | Copy loss    |
| BGC823 | chr5 | 84160301  | 84648200  | 0.456397   | Copy gain    |
| BGC823 | chr5 | 84648201  | 84704900  | -0.0484026 | Copy neutral |
| BGC823 | chr5 | 84704901  | 85553300  | 0.476297   | Copy gain    |
| BGC823 | chr5 | 85553301  | 85600200  | 0.760597   | Copy gain    |
| BGC823 | chr5 | 85600201  | 85708700  | 0.484397   | Copy gain    |
| BGC823 | chr5 | 85708701  | 87967600  | -0.0301026 | Copy neutral |
| BGC823 | chr5 | 87967601  | 87992100  | -0.688103  | Copy loss    |
| BGC823 | chr5 | 87992101  | 90020700  | -0.0647026 | Copy neutral |
| BGC823 | chr5 | 90020701  | 90498800  | 0.0391974  | Copy neutral |
| BGC823 | chr5 | 90498801  | 90721400  | -0.129003  | Copy neutral |
| BGC823 | chr5 | 90721401  | 91636129  | 0.0638974  | Copy neutral |
| BGC823 | chr5 | 91686128  | 96689600  | 0.0638974  | Copy neutral |
| BGC823 | chr5 | 96689601  | 98269500  | -0.0214026 | Copy neutral |
| BGC823 | chr5 | 98269501  | 98393400  | -1.0932    | Copy loss    |
| BGC823 | chr5 | 98393401  | 100744000 | 0.0127974  | Copy neutral |
| BGC823 | chr5 | 100744001 | 106325100 | 0.500997   | Copy gain    |
| BGC823 | chr5 | 106325101 | 106326500 | -6.2842    | Copy loss    |
| BGC823 | chr5 | 106326501 | 136854900 | 0.555197   | Copy gain    |
| BGC823 | chr5 | 136854901 | 136856300 | -8.3671    | Copy loss    |
| BGC823 | chr5 | 136856301 | 137205600 | 0.642697   | Copy gain    |
| BGC823 | chr5 | 137205601 | 138135900 | 0.406697   | Copy neutral |
| BGC823 | chr5 | 138135901 | 138552400 | 0.571997   | Copy gain    |
| BGC823 | chr5 | 138552401 | 138787074 | 0.420197   | Copy neutral |
| BGC823 | chr5 | 138837073 | 138910100 | 0.420197   | Copy neutral |
| BGC823 | chr5 | 138910101 | 139005300 | 0.205197   | Copy neutral |
| BGC823 | chr5 | 139005301 | 139117300 | 0.442097   | Copy neutral |
| BGC823 | chr5 | 139117301 | 139752900 | 0.581197   | Copy gain    |
| BGC823 | chr5 | 139752901 | 139799800 | 0.268097   | Copy neutral |
| BGC823 | chr5 | 139799801 | 140225400 | 0.513697   | Copy gain    |
| BGC823 | chr5 | 140225401 | 140238000 | -0.0909026 | Copy neutral |
| BGC823 | chr5 | 140238001 | 140898100 | 0.486397   | Copy gain    |

|        |      |           |           |             |              |
|--------|------|-----------|-----------|-------------|--------------|
| BGC823 | chr5 | 140898101 | 141265600 | 0.580797    | Copy gain    |
| BGC823 | chr5 | 141265601 | 141274700 | -0.0972026  | Copy neutral |
| BGC823 | chr5 | 141274701 | 141388100 | 0.593497    | Copy gain    |
| BGC823 | chr5 | 141388101 | 141962100 | 0.435997    | Copy neutral |
| BGC823 | chr5 | 141962101 | 147553000 | 0.610797    | Copy gain    |
| BGC823 | chr5 | 147553001 | 147554400 | -4.8024     | Copy loss    |
| BGC823 | chr5 | 147554401 | 147682500 | 0.712997    | Copy gain    |
| BGC823 | chr5 | 147682501 | 147692300 | 0.274697    | Copy neutral |
| BGC823 | chr5 | 147692301 | 148749300 | 0.108497    | Copy neutral |
| BGC823 | chr5 | 148749301 | 149029300 | -0.120603   | Copy neutral |
| BGC823 | chr5 | 149029301 | 149030700 | -8.3671     | Copy loss    |
| BGC823 | chr5 | 149030701 | 149786700 | -0.0113026  | Copy neutral |
| BGC823 | chr5 | 149786701 | 149865100 | -0.298703   | Copy neutral |
| BGC823 | chr5 | 149865101 | 150206000 | -0.00830263 | Copy neutral |
| BGC823 | chr5 | 150206001 | 150223500 | -1.0238     | Copy loss    |
| BGC823 | chr5 | 150223501 | 150458700 | 0.108697    | Copy neutral |
| BGC823 | chr5 | 150458701 | 151126500 | -0.0431026  | Copy neutral |
| BGC823 | chr5 | 151126501 | 151151700 | -0.366303   | Copy neutral |
| BGC823 | chr5 | 151151701 | 152809300 | -0.0144026  | Copy neutral |
| BGC823 | chr5 | 152809301 | 153804000 | 0.603697    | Copy gain    |
| BGC823 | chr5 | 153804001 | 153806800 | -1.0296     | Copy loss    |
| BGC823 | chr5 | 153806801 | 154147700 | 0.429097    | Copy neutral |
| BGC823 | chr5 | 154147701 | 154172200 | -0.183903   | Copy neutral |
| BGC823 | chr5 | 154172201 | 154249900 | 0.397497    | Copy neutral |
| BGC823 | chr5 | 154249901 | 154413000 | 0.541497    | Copy gain    |
| BGC823 | chr5 | 154413001 | 155138728 | 0.972297    | Copy gain    |
| BGC823 | chr5 | 155188727 | 155475950 | 0.972297    | Copy gain    |
| BGC823 | chr5 | 155475951 | 155495200 | -1.1668     | Copy loss    |
| BGC823 | chr5 | 155495201 | 155704500 | 0.877297    | Copy gain    |
| BGC823 | chr5 | 155704501 | 156168600 | 0.955397    | Copy gain    |
| BGC823 | chr5 | 156168601 | 156480100 | 0.852797    | Copy gain    |
| BGC823 | chr5 | 156480101 | 156581600 | 0.633197    | Copy gain    |
| BGC823 | chr5 | 156581601 | 157255700 | 0.880097    | Copy gain    |
| BGC823 | chr5 | 157255701 | 157420200 | 0.693797    | Copy gain    |
| BGC823 | chr5 | 157420201 | 157517500 | 0.875497    | Copy gain    |
| BGC823 | chr5 | 157517501 | 158526200 | 0.963897    | Copy gain    |
| BGC823 | chr5 | 158526201 | 158527600 | -1.1095     | Copy loss    |
| BGC823 | chr5 | 158527601 | 158636800 | 0.977797    | Copy gain    |
| BGC823 | chr5 | 158636801 | 159353600 | 1.0768      | Copy gain    |
| BGC823 | chr5 | 159353601 | 159511800 | 0.932997    | Copy gain    |
| BGC823 | chr5 | 159511801 | 159677000 | 0.704097    | Copy gain    |
| BGC823 | chr5 | 159677001 | 162862000 | 0.962697    | Copy gain    |
| BGC823 | chr5 | 162862001 | 162863400 | -0.887503   | Copy loss    |
| BGC823 | chr5 | 162863401 | 163369500 | 0.951197    | Copy gain    |
| BGC823 | chr5 | 163369501 | 163923900 | 0.905297    | Copy gain    |
| BGC823 | chr5 | 163923901 | 166462100 | 0.840097    | Copy gain    |
| BGC823 | chr5 | 166462101 | 166940200 | 0.947397    | Copy gain    |
| BGC823 | chr5 | 166940201 | 166945800 | 0.0698974   | Copy neutral |
| BGC823 | chr5 | 166945801 | 166960500 | 0.945997    | Copy gain    |
| BGC823 | chr5 | 166960501 | 175718200 | 1.0184      | Copy gain    |
| BGC823 | chr5 | 175718201 | 177335200 | 0.831597    | Copy gain    |
| BGC823 | chr5 | 177335201 | 177347100 | -1.9999     | Copy loss    |

|        |      |           |           |           |              |
|--------|------|-----------|-----------|-----------|--------------|
| BGC823 | chr5 | 177347101 | 180905261 | 0.813197  | Copy gain    |
| BGC823 | chr5 | 180915260 | 180915260 | 0.813197  | Copy gain    |
| BGC823 | chr6 | 60000     | 695100    | 0.482197  | Copy gain    |
| BGC823 | chr6 | 695101    | 14674100  | 0.577497  | Copy gain    |
| BGC823 | chr6 | 14674101  | 14926800  | 0.446997  | Copy neutral |
| BGC823 | chr6 | 14926801  | 15246700  | 0.196197  | Copy neutral |
| BGC823 | chr6 | 15246701  | 17696000  | 0.443697  | Copy neutral |
| BGC823 | chr6 | 17696001  | 17758300  | 0.162797  | Copy neutral |
| BGC823 | chr6 | 17758301  | 18343500  | 0.462997  | Copy gain    |
| BGC823 | chr6 | 18343501  | 21381500  | 0.537197  | Copy gain    |
| BGC823 | chr6 | 21381501  | 21574000  | 0.465397  | Copy gain    |
| BGC823 | chr6 | 21574001  | 21812000  | 0.243897  | Copy neutral |
| BGC823 | chr6 | 21812001  | 22167250  | 0.439797  | Copy neutral |
| BGC823 | chr6 | 22167251  | 22174600  | -6.3733   | Copy loss    |
| BGC823 | chr6 | 22174601  | 24857000  | 0.507197  | Copy gain    |
| BGC823 | chr6 | 24857001  | 25886000  | 0.616197  | Copy gain    |
| BGC823 | chr6 | 25886001  | 26360600  | 0.389897  | Copy neutral |
| BGC823 | chr6 | 26360601  | 26480300  | 0.655597  | Copy gain    |
| BGC823 | chr6 | 26480301  | 26669650  | 0.424297  | Copy neutral |
| BGC823 | chr6 | 26669651  | 26744200  | 1.7242    | Copy gain    |
| BGC823 | chr6 | 26744201  | 27012300  | 0.709997  | Copy gain    |
| BGC823 | chr6 | 27012301  | 27177500  | 0.357997  | Copy neutral |
| BGC823 | chr6 | 27177501  | 27196400  | -0.177603 | Copy neutral |
| BGC823 | chr6 | 27196401  | 27274100  | 0.284097  | Copy neutral |
| BGC823 | chr6 | 27274101  | 27449100  | 0.530797  | Copy gain    |
| BGC823 | chr6 | 27449101  | 27886600  | 0.267697  | Copy neutral |
| BGC823 | chr6 | 27886601  | 28548100  | 0.550697  | Copy gain    |
| BGC823 | chr6 | 28548101  | 28961100  | 0.326597  | Copy neutral |
| BGC823 | chr6 | 28961101  | 29594600  | 0.638597  | Copy gain    |
| BGC823 | chr6 | 29594601  | 29673000  | 0.256997  | Copy neutral |
| BGC823 | chr6 | 29673001  | 29843800  | 0.587197  | Copy gain    |
| BGC823 | chr6 | 29843801  | 29848700  | -7.6773   | Copy loss    |
| BGC823 | chr6 | 29848701  | 31279500  | 0.532197  | Copy gain    |
| BGC823 | chr6 | 31279501  | 31288600  | -8.3671   | Copy loss    |
| BGC823 | chr6 | 31288601  | 31294200  | -2.1184   | Copy loss    |
| BGC823 | chr6 | 31294201  | 32454800  | 0.462497  | Copy gain    |
| BGC823 | chr6 | 32454801  | 32496800  | -6.5933   | Copy loss    |
| BGC823 | chr6 | 32496801  | 33572700  | 0.417097  | Copy neutral |
| BGC823 | chr6 | 33572701  | 33574100  | -8.3671   | Copy loss    |
| BGC823 | chr6 | 33574101  | 33938100  | 0.516997  | Copy gain    |
| BGC823 | chr6 | 33938101  | 33942300  | -8.3671   | Copy loss    |
| BGC823 | chr6 | 33942301  | 33943700  | -0.935803 | Copy loss    |
| BGC823 | chr6 | 33943701  | 34038900  | 0.545997  | Copy gain    |
| BGC823 | chr6 | 34038901  | 34041000  | 1.4659    | Copy gain    |
| BGC823 | chr6 | 34041001  | 34101900  | 0.510497  | Copy gain    |
| BGC823 | chr6 | 34101901  | 34241200  | 0.267597  | Copy neutral |
| BGC823 | chr6 | 34241201  | 34316100  | 0.565297  | Copy gain    |
| BGC823 | chr6 | 34316101  | 34317500  | -1.2068   | Copy loss    |
| BGC823 | chr6 | 34317501  | 34319600  | -7.8666   | Copy loss    |
| BGC823 | chr6 | 34319601  | 54472600  | 0.535897  | Copy gain    |
| BGC823 | chr6 | 54472601  | 54662300  | 0.0402974 | Copy neutral |
| BGC823 | chr6 | 54662301  | 54665800  | -7.5631   | Copy loss    |

|        |      |          |          |             |              |
|--------|------|----------|----------|-------------|--------------|
| BGC823 | chr6 | 54665801 | 55967100 | 0.0800974   | Copy neutral |
| BGC823 | chr6 | 55967101 | 56051100 | 0.608797    | Copy gain    |
| BGC823 | chr6 | 56051101 | 56517300 | 0.746097    | Copy gain    |
| BGC823 | chr6 | 56517301 | 57202600 | 0.647597    | Copy gain    |
| BGC823 | chr6 | 57202601 | 57284500 | 1.2857      | Copy gain    |
| BGC823 | chr6 | 57284501 | 57289400 | 0.679197    | Copy gain    |
| BGC823 | chr6 | 57289401 | 57297100 | 1.2197      | Copy gain    |
| BGC823 | chr6 | 57297101 | 57300600 | 0.390197    | Copy neutral |
| BGC823 | chr6 | 57300601 | 57317050 | 1.1892      | Copy gain    |
| BGC823 | chr6 | 57317051 | 57321600 | 0.405197    | Copy neutral |
| BGC823 | chr6 | 57321601 | 57369200 | 1.2322      | Copy gain    |
| BGC823 | chr6 | 57369201 | 57426950 | 1.9327      | Copy gain    |
| BGC823 | chr6 | 57426951 | 57429400 | 0.645597    | Copy gain    |
| BGC823 | chr6 | 57429401 | 57533000 | 1.9406      | Copy gain    |
| BGC823 | chr6 | 57533001 | 57535100 | 0.859897    | Copy gain    |
| BGC823 | chr6 | 57535101 | 57567300 | 1.8367      | Copy gain    |
| BGC823 | chr6 | 57567301 | 57573600 | 0.524797    | Copy gain    |
| BGC823 | chr6 | 57573601 | 57583400 | 1.4661      | Copy gain    |
| BGC823 | chr6 | 57583401 | 57608600 | 0.866097    | Copy gain    |
| BGC823 | chr6 | 57608601 | 57964900 | -0.00100263 | Copy neutral |
| BGC823 | chr6 | 57964901 | 57994300 | -0.260303   | Copy neutral |
| BGC823 | chr6 | 57994301 | 57996400 | 0.537597    | Copy gain    |
| BGC823 | chr6 | 57996401 | 58013200 | -0.380403   | Copy neutral |
| BGC823 | chr6 | 58013201 | 58087660 | 0.0353974   | Copy neutral |
| BGC823 | chr6 | 58137659 | 58277100 | 0.828197    | Copy gain    |
| BGC823 | chr6 | 58277101 | 58288300 | 0.183297    | Copy neutral |
| BGC823 | chr6 | 58288301 | 58301600 | 0.715997    | Copy gain    |
| BGC823 | chr6 | 58301601 | 58304400 | -1.8127     | Copy loss    |
| BGC823 | chr6 | 58304401 | 58314200 | -6.7906     | Copy loss    |
| BGC823 | chr6 | 58314201 | 58773400 | 0.640397    | Copy gain    |
| BGC823 | chr6 | 58773401 | 58776200 | 2.0776      | Copy gain    |
| BGC823 | chr6 | 58776201 | 58780167 | 10.2383     | Copy gain    |
| BGC823 | chr6 | 61880166 | 61910800 | -0.115203   | Copy neutral |
| BGC823 | chr6 | 61910801 | 61915000 | 1.3269      | Copy gain    |
| BGC823 | chr6 | 61915001 | 61963300 | -0.185203   | Copy neutral |
| BGC823 | chr6 | 61963301 | 62128590 | -0.0423026  | Copy neutral |
| BGC823 | chr6 | 62178589 | 63544600 | -0.0423026  | Copy neutral |
| BGC823 | chr6 | 63544601 | 63599200 | -0.236703   | Copy neutral |
| BGC823 | chr6 | 63599201 | 64124200 | 0.0688974   | Copy neutral |
| BGC823 | chr6 | 64124201 | 64251600 | -0.205403   | Copy neutral |
| BGC823 | chr6 | 64251601 | 65346750 | 0.0594974   | Copy neutral |
| BGC823 | chr6 | 65346751 | 65349900 | -8.3671     | Copy loss    |
| BGC823 | chr6 | 65349901 | 65396800 | -0.0900026  | Copy neutral |
| BGC823 | chr6 | 65396801 | 66174500 | 0.0124974   | Copy neutral |
| BGC823 | chr6 | 66174501 | 70014700 | -0.0594026  | Copy neutral |
| BGC823 | chr6 | 70014701 | 70018200 | -8.3671     | Copy loss    |
| BGC823 | chr6 | 70018201 | 71610700 | -0.0393026  | Copy neutral |
| BGC823 | chr6 | 71610701 | 73051300 | 0.0535974   | Copy neutral |
| BGC823 | chr6 | 73051301 | 73910900 | -0.0100026  | Copy neutral |
| BGC823 | chr6 | 73910901 | 74340700 | -0.319003   | Copy neutral |
| BGC823 | chr6 | 74340701 | 74342800 | -8.0472     | Copy loss    |
| BGC823 | chr6 | 74342801 | 74592000 | 0.000997368 | Copy neutral |

|        |      |           |           |             |              |
|--------|------|-----------|-----------|-------------|--------------|
| BGC823 | chr6 | 74592001  | 74602500  | -8.267      | Copy loss    |
| BGC823 | chr6 | 74602501  | 75909400  | 0.0844974   | Copy neutral |
| BGC823 | chr6 | 75909401  | 76097000  | -0.0687026  | Copy neutral |
| BGC823 | chr6 | 76097001  | 76243300  | 0.0359974   | Copy neutral |
| BGC823 | chr6 | 76243301  | 76602400  | -0.127403   | Copy neutral |
| BGC823 | chr6 | 76602401  | 78967700  | 0.00979737  | Copy neutral |
| BGC823 | chr6 | 78967701  | 79036300  | -8.3671     | Copy loss    |
| BGC823 | chr6 | 79036301  | 82137300  | 0.0308974   | Copy neutral |
| BGC823 | chr6 | 82137301  | 82872300  | 0.128297    | Copy neutral |
| BGC823 | chr6 | 82872301  | 82874400  | -1.2622     | Copy loss    |
| BGC823 | chr6 | 82874401  | 82936000  | -0.0670026  | Copy neutral |
| BGC823 | chr6 | 82936001  | 82968200  | -0.339603   | Copy neutral |
| BGC823 | chr6 | 82968201  | 83271300  | 0.00479737  | Copy neutral |
| BGC823 | chr6 | 83271301  | 83275500  | 2.6468      | Copy gain    |
| BGC823 | chr6 | 83275501  | 87766000  | 0.00529737  | Copy neutral |
| BGC823 | chr6 | 87766001  | 88577300  | -0.126803   | Copy neutral |
| BGC823 | chr6 | 88577301  | 89671400  | -0.0192026  | Copy neutral |
| BGC823 | chr6 | 89671401  | 90481300  | -0.166603   | Copy neutral |
| BGC823 | chr6 | 90481301  | 90622000  | -0.433203   | Copy neutral |
| BGC823 | chr6 | 90622001  | 91884100  | -0.0659026  | Copy neutral |
| BGC823 | chr6 | 91884101  | 92022700  | -0.0175026  | Copy neutral |
| BGC823 | chr6 | 92022701  | 93471700  | 0.0562974   | Copy neutral |
| BGC823 | chr6 | 93471701  | 94539900  | -0.0321026  | Copy neutral |
| BGC823 | chr6 | 94539901  | 94544800  | -5.2496     | Copy loss    |
| BGC823 | chr6 | 94544801  | 95680544  | -0.0553026  | Copy neutral |
| BGC823 | chr6 | 95830543  | 98227500  | -0.0553026  | Copy neutral |
| BGC823 | chr6 | 98227501  | 98232050  | 1.7603      | Copy gain    |
| BGC823 | chr6 | 98232051  | 99270500  | -0.0328026  | Copy neutral |
| BGC823 | chr6 | 99270501  | 99294300  | -0.530203   | Copy loss    |
| BGC823 | chr6 | 99294301  | 99793400  | -0.00300263 | Copy neutral |
| BGC823 | chr6 | 99793401  | 100058000 | -0.181103   | Copy neutral |
| BGC823 | chr6 | 100058001 | 100893800 | 0.0258974   | Copy neutral |
| BGC823 | chr6 | 100893801 | 100917600 | -0.372103   | Copy neutral |
| BGC823 | chr6 | 100917601 | 101101000 | 0.102997    | Copy neutral |
| BGC823 | chr6 | 101101001 | 101255700 | -0.755703   | Copy loss    |
| BGC823 | chr6 | 101255701 | 106946700 | 0.00629737  | Copy neutral |
| BGC823 | chr6 | 106946701 | 111646500 | -0.110203   | Copy neutral |
| BGC823 | chr6 | 111646501 | 115526600 | 0.00669737  | Copy neutral |
| BGC823 | chr6 | 115526601 | 115770900 | 0.536397    | Copy gain    |
| BGC823 | chr6 | 115770901 | 115772300 | -0.523203   | Copy loss    |
| BGC823 | chr6 | 115772301 | 115976700 | 0.572197    | Copy gain    |
| BGC823 | chr6 | 115976701 | 116681600 | 0.636297    | Copy gain    |
| BGC823 | chr6 | 116681601 | 117104400 | 0.550497    | Copy gain    |
| BGC823 | chr6 | 117104401 | 118352500 | 0.640397    | Copy gain    |
| BGC823 | chr6 | 118352501 | 118743100 | 0.547497    | Copy gain    |
| BGC823 | chr6 | 118743101 | 118759900 | 0.892997    | Copy gain    |
| BGC823 | chr6 | 118759901 | 118775300 | 0.573897    | Copy gain    |
| BGC823 | chr6 | 118775301 | 119165200 | -0.0807026  | Copy neutral |
| BGC823 | chr6 | 119165201 | 119172900 | -7.8969     | Copy loss    |
| BGC823 | chr6 | 119172901 | 119192500 | 0.122297    | Copy neutral |
| BGC823 | chr6 | 119192501 | 121714600 | -0.0337026  | Copy neutral |
| BGC823 | chr6 | 121714601 | 121881200 | -0.347403   | Copy neutral |

|        |      |           |           |             |              |
|--------|------|-----------|-----------|-------------|--------------|
| BGC823 | chr6 | 121881201 | 124722500 | -0.0644026  | Copy neutral |
| BGC823 | chr6 | 124722501 | 125904100 | 0.0675974   | Copy neutral |
| BGC823 | chr6 | 125904101 | 125906200 | -1.2168     | Copy loss    |
| BGC823 | chr6 | 125906201 | 126183400 | 0.0567974   | Copy neutral |
| BGC823 | chr6 | 126183401 | 126186900 | -8.3671     | Copy loss    |
| BGC823 | chr6 | 126186901 | 127649900 | 0.0711974   | Copy neutral |
| BGC823 | chr6 | 127649901 | 127871100 | -0.114103   | Copy neutral |
| BGC823 | chr6 | 127871101 | 130280500 | 0.0686974   | Copy neutral |
| BGC823 | chr6 | 130280501 | 131870200 | -0.0284026  | Copy neutral |
| BGC823 | chr6 | 131870201 | 132265000 | -0.131003   | Copy neutral |
| BGC823 | chr6 | 132265001 | 133073500 | -0.00370263 | Copy neutral |
| BGC823 | chr6 | 133073501 | 133150500 | -0.301703   | Copy neutral |
| BGC823 | chr6 | 133150501 | 133272300 | -0.127403   | Copy neutral |
| BGC823 | chr6 | 133272301 | 133746200 | 0.0428974   | Copy neutral |
| BGC823 | chr6 | 133746201 | 133747600 | -5.0835     | Copy loss    |
| BGC823 | chr6 | 133747601 | 135782500 | -0.0433026  | Copy neutral |
| BGC823 | chr6 | 135782501 | 135783900 | -5.0996     | Copy loss    |
| BGC823 | chr6 | 135783901 | 139916000 | -0.0225026  | Copy neutral |
| BGC823 | chr6 | 139916001 | 149681700 | 0.594497    | Copy gain    |
| BGC823 | chr6 | 149681701 | 153958700 | -0.0795026  | Copy neutral |
| BGC823 | chr6 | 153958701 | 153961500 | -8.3671     | Copy loss    |
| BGC823 | chr6 | 153961501 | 157559468 | -0.0594026  | Copy neutral |
| BGC823 | chr6 | 157609467 | 157641301 | -0.0594026  | Copy neutral |
| BGC823 | chr6 | 157691300 | 160982500 | -0.0594026  | Copy neutral |
| BGC823 | chr6 | 160982501 | 161098700 | 0.744497    | Copy gain    |
| BGC823 | chr6 | 161098701 | 164543400 | -0.140403   | Copy neutral |
| BGC823 | chr6 | 164543401 | 164546900 | -8.3671     | Copy loss    |
| BGC823 | chr6 | 164546901 | 165039700 | -0.105103   | Copy neutral |
| BGC823 | chr6 | 165039701 | 165705400 | -0.00320263 | Copy neutral |
| BGC823 | chr6 | 165705401 | 165725000 | -0.366403   | Copy neutral |
| BGC823 | chr6 | 165725001 | 165732000 | -8.3671     | Copy loss    |
| BGC823 | chr6 | 165732001 | 166169500 | 0.0366974   | Copy neutral |
| BGC823 | chr6 | 166169501 | 166269600 | 0.543497    | Copy gain    |
| BGC823 | chr6 | 166269601 | 166563600 | 0.673497    | Copy gain    |
| BGC823 | chr6 | 166563601 | 167488300 | 0.491697    | Copy gain    |
| BGC823 | chr6 | 167488301 | 167489700 | -7.9917     | Copy loss    |
| BGC823 | chr6 | 167489701 | 167622000 | 0.599797    | Copy gain    |
| BGC823 | chr6 | 167622001 | 167695500 | -0.129403   | Copy neutral |
| BGC823 | chr6 | 167695501 | 167787200 | 1.2234      | Copy gain    |
| BGC823 | chr6 | 167787201 | 167793150 | 0.449497    | Copy neutral |
| BGC823 | chr6 | 167793151 | 167942074 | -0.115103   | Copy neutral |
| BGC823 | chr6 | 168042073 | 170279973 | -0.115103   | Copy neutral |
| BGC823 | chr6 | 170329972 | 171055068 | -0.115103   | Copy neutral |
| BGC823 | chr6 | 171115067 | 171115067 | -0.115103   | Copy neutral |
| BGC823 | chr7 | 10000     | 232485    | 0.682197    | Copy gain    |
| BGC823 | chr7 | 282484    | 2765700   | 0.682197    | Copy gain    |
| BGC823 | chr7 | 2765701   | 2891000   | 0.997797    | Copy gain    |
| BGC823 | chr7 | 2891001   | 3135300   | 0.820297    | Copy gain    |
| BGC823 | chr7 | 3135301   | 3138100   | -0.268603   | Copy neutral |
| BGC823 | chr7 | 3138101   | 3152100   | 0.831597    | Copy gain    |
| BGC823 | chr7 | 3152101   | 3171700   | 1.1839      | Copy gain    |
| BGC823 | chr7 | 3171701   | 3334800   | 0.833897    | Copy gain    |

|        |      |          |          |           |              |
|--------|------|----------|----------|-----------|--------------|
| BGC823 | chr7 | 3334801  | 3342500  | 0.311797  | Copy neutral |
| BGC823 | chr7 | 3342501  | 4078900  | 0.916697  | Copy gain    |
| BGC823 | chr7 | 4078901  | 6851600  | 0.699197  | Copy gain    |
| BGC823 | chr7 | 6851601  | 6862800  | -2.4285   | Copy loss    |
| BGC823 | chr7 | 6862801  | 6867000  | 0.0144974 | Copy neutral |
| BGC823 | chr7 | 6867001  | 6889400  | 0.972397  | Copy gain    |
| BGC823 | chr7 | 6889401  | 6897100  | 0.236597  | Copy neutral |
| BGC823 | chr7 | 6897101  | 8929200  | 0.992097  | Copy gain    |
| BGC823 | chr7 | 8929201  | 11516400 | 0.902697  | Copy gain    |
| BGC823 | chr7 | 11516401 | 12040700 | 0.965397  | Copy gain    |
| BGC823 | chr7 | 12040701 | 12716900 | 1.0226    | Copy gain    |
| BGC823 | chr7 | 12716901 | 14791000 | 0.917997  | Copy gain    |
| BGC823 | chr7 | 14791001 | 15327200 | 0.996797  | Copy gain    |
| BGC823 | chr7 | 15327201 | 15943200 | 0.903797  | Copy gain    |
| BGC823 | chr7 | 15943201 | 16436000 | 1.038     | Copy gain    |
| BGC823 | chr7 | 16436001 | 16440200 | 1.8158    | Copy gain    |
| BGC823 | chr7 | 16440201 | 16929500 | 0.959497  | Copy gain    |
| BGC823 | chr7 | 16929501 | 17966200 | 1.0848    | Copy gain    |
| BGC823 | chr7 | 17966201 | 18927300 | 1.0033    | Copy gain    |
| BGC823 | chr7 | 18927301 | 19145000 | 0.976997  | Copy gain    |
| BGC823 | chr7 | 19145001 | 19159700 | 0.463297  | Copy gain    |
| BGC823 | chr7 | 19159701 | 19890500 | 0.924697  | Copy gain    |
| BGC823 | chr7 | 19890501 | 20668900 | 1.0127    | Copy gain    |
| BGC823 | chr7 | 20668901 | 20795600 | 0.900697  | Copy gain    |
| BGC823 | chr7 | 20795601 | 20860700 | 0.506097  | Copy gain    |
| BGC823 | chr7 | 20860701 | 22420300 | 0.906897  | Copy gain    |
| BGC823 | chr7 | 22420301 | 22807400 | 1.0263    | Copy gain    |
| BGC823 | chr7 | 22807401 | 23431800 | 0.937997  | Copy gain    |
| BGC823 | chr7 | 23431801 | 23514400 | 0.491297  | Copy gain    |
| BGC823 | chr7 | 23514401 | 23629900 | 0.716197  | Copy gain    |
| BGC823 | chr7 | 23629901 | 24038000 | 0.976197  | Copy gain    |
| BGC823 | chr7 | 24038001 | 24040100 | -4.2561   | Copy loss    |
| BGC823 | chr7 | 24040101 | 31315900 | 0.961097  | Copy gain    |
| BGC823 | chr7 | 31315901 | 31318700 | -8.3671   | Copy loss    |
| BGC823 | chr7 | 31318701 | 32432400 | 0.985997  | Copy gain    |
| BGC823 | chr7 | 32432401 | 32657800 | 0.861297  | Copy gain    |
| BGC823 | chr7 | 32657801 | 32970000 | 1.0182    | Copy gain    |
| BGC823 | chr7 | 32970001 | 33000100 | 0.632897  | Copy gain    |
| BGC823 | chr7 | 33000101 | 33062400 | 1.0366    | Copy gain    |
| BGC823 | chr7 | 33062401 | 33103700 | 0.730597  | Copy gain    |
| BGC823 | chr7 | 33103701 | 35275800 | 0.977397  | Copy gain    |
| BGC823 | chr7 | 35275801 | 35306600 | 0.591597  | Copy gain    |
| BGC823 | chr7 | 35306601 | 35350000 | 0.925697  | Copy gain    |
| BGC823 | chr7 | 35350001 | 35351400 | -4.711    | Copy loss    |
| BGC823 | chr7 | 35351401 | 36056300 | 0.946097  | Copy gain    |
| BGC823 | chr7 | 36056301 | 37331000 | 0.995997  | Copy gain    |
| BGC823 | chr7 | 37331001 | 37334500 | 0.127097  | Copy neutral |
| BGC823 | chr7 | 37334501 | 37886800 | 1.0272    | Copy gain    |
| BGC823 | chr7 | 37886801 | 37888200 | -0.515903 | Copy loss    |
| BGC823 | chr7 | 37888201 | 38311700 | 1.0107    | Copy gain    |
| BGC823 | chr7 | 38311701 | 39964400 | 0.935297  | Copy gain    |
| BGC823 | chr7 | 39964401 | 40000800 | 0.673397  | Copy gain    |



|        |      |          |          |            |              |
|--------|------|----------|----------|------------|--------------|
| BGC823 | chr7 | 40000801 | 40006400 | 1.4457     | Copy gain    |
| BGC823 | chr7 | 40006401 | 40317200 | 0.768697   | Copy gain    |
| BGC823 | chr7 | 40317201 | 40784100 | 0.978097   | Copy gain    |
| BGC823 | chr7 | 40784101 | 41209700 | 1.0686     | Copy gain    |
| BGC823 | chr7 | 41209701 | 44256100 | 0.957697   | Copy gain    |
| BGC823 | chr7 | 44256101 | 44282000 | 0.566297   | Copy gain    |
| BGC823 | chr7 | 44282001 | 44375800 | 0.902497   | Copy gain    |
| BGC823 | chr7 | 44375801 | 44529100 | 1.089      | Copy gain    |
| BGC823 | chr7 | 44529101 | 44726500 | 0.918497   | Copy gain    |
| BGC823 | chr7 | 44726501 | 45004400 | 0.771197   | Copy gain    |
| BGC823 | chr7 | 45004401 | 45213700 | 0.924197   | Copy gain    |
| BGC823 | chr7 | 45213701 | 45597300 | 1.0734     | Copy gain    |
| BGC823 | chr7 | 45597301 | 45894100 | 0.967797   | Copy gain    |
| BGC823 | chr7 | 45894101 | 47603500 | 1.0658     | Copy gain    |
| BGC823 | chr7 | 47603501 | 47756800 | 0.886897   | Copy gain    |
| BGC823 | chr7 | 47756801 | 49098700 | 1.0354     | Copy gain    |
| BGC823 | chr7 | 49098701 | 49811300 | 0.967497   | Copy gain    |
| BGC823 | chr7 | 49811301 | 49815500 | -0.0356026 | Copy neutral |
| BGC823 | chr7 | 49815501 | 49898100 | 0.984097   | Copy gain    |
| BGC823 | chr7 | 49898101 | 50077300 | 0.864697   | Copy gain    |
| BGC823 | chr7 | 50077301 | 50104600 | 1.0637     | Copy gain    |
| BGC823 | chr7 | 50104601 | 50106000 | -5.5784    | Copy loss    |
| BGC823 | chr7 | 50106001 | 50370632 | 0.922397   | Copy gain    |
| BGC823 | chr7 | 50410631 | 50859900 | 0.922397   | Copy gain    |
| BGC823 | chr7 | 50859901 | 50861300 | -4.1922    | Copy loss    |
| BGC823 | chr7 | 50861301 | 51594900 | 1.0248     | Copy gain    |
| BGC823 | chr7 | 51594901 | 51598400 | -8.3671    | Copy loss    |
| BGC823 | chr7 | 51598401 | 57064000 | 0.909997   | Copy gain    |
| BGC823 | chr7 | 57064001 | 57079400 | -2.5911    | Copy loss    |
| BGC823 | chr7 | 57079401 | 57119300 | 0.200797   | Copy neutral |
| BGC823 | chr7 | 57119301 | 57545600 | 0.766597   | Copy gain    |
| BGC823 | chr7 | 57545601 | 57556800 | 1.7841     | Copy gain    |
| BGC823 | chr7 | 57556801 | 57606500 | 0.878997   | Copy gain    |
| BGC823 | chr7 | 57606501 | 57636600 | 1.1763     | Copy gain    |
| BGC823 | chr7 | 57636601 | 57669500 | 0.953997   | Copy gain    |
| BGC823 | chr7 | 57669501 | 57699600 | 1.9493     | Copy gain    |
| BGC823 | chr7 | 57699601 | 57726900 | 1.2348     | Copy gain    |
| BGC823 | chr7 | 57726901 | 57738100 | 2.0595     | Copy gain    |
| BGC823 | chr7 | 57738101 | 57802500 | 1.3013     | Copy gain    |
| BGC823 | chr7 | 57802501 | 57882300 | 0.890897   | Copy gain    |
| BGC823 | chr7 | 57882301 | 57965600 | 1.2395     | Copy gain    |
| BGC823 | chr7 | 57965601 | 57975400 | 0.213497   | Copy neutral |
| BGC823 | chr7 | 57975401 | 57992200 | 0.895597   | Copy gain    |
| BGC823 | chr7 | 57992201 | 57997800 | 2.2453     | Copy gain    |
| BGC823 | chr7 | 57997801 | 58054332 | 0.895497   | Copy gain    |
| BGC823 | chr7 | 61054331 | 61310514 | 1.5756     | Copy gain    |
| BGC823 | chr7 | 61360513 | 61460466 | 1.5756     | Copy gain    |
| BGC823 | chr7 | 61510465 | 61674900 | 1.5756     | Copy gain    |
| BGC823 | chr7 | 61674901 | 61677021 | 2.4943     | Copy gain    |
| BGC823 | chr7 | 61727020 | 61758200 | 2.4943     | Copy gain    |
| BGC823 | chr7 | 61758201 | 61779200 | 1.5508     | Copy gain    |
| BGC823 | chr7 | 61779201 | 61834500 | 2.576      | Copy gain    |

|        |      |          |          |           |              |
|--------|------|----------|----------|-----------|--------------|
| BGC823 | chr7 | 61834501 | 61849200 | 1.5637    | Copy gain    |
| BGC823 | chr7 | 61849201 | 61857600 | 0.767497  | Copy gain    |
| BGC823 | chr7 | 61857601 | 61897500 | 1.5482    | Copy gain    |
| BGC823 | chr7 | 61897501 | 61903100 | 1.8978    | Copy gain    |
| BGC823 | chr7 | 61903101 | 61908000 | 1.5685    | Copy gain    |
| BGC823 | chr7 | 61908001 | 61917158 | 1.7855    | Copy gain    |
| BGC823 | chr7 | 61967157 | 61971000 | 9.4726    | Copy gain    |
| BGC823 | chr7 | 61971001 | 61980800 | 2.5085    | Copy gain    |
| BGC823 | chr7 | 61980801 | 62035400 | 0.979697  | Copy gain    |
| BGC823 | chr7 | 62035401 | 62036800 | 0.334697  | Copy neutral |
| BGC823 | chr7 | 62036801 | 62059550 | 0.825297  | Copy gain    |
| BGC823 | chr7 | 62059551 | 62062700 | 0.330197  | Copy neutral |
| BGC823 | chr7 | 62062701 | 62066900 | 1.2692    | Copy gain    |
| BGC823 | chr7 | 62066901 | 62099100 | 0.724297  | Copy gain    |
| BGC823 | chr7 | 62099101 | 62103300 | 1.0898    | Copy gain    |
| BGC823 | chr7 | 62103301 | 62129200 | 0.754897  | Copy gain    |
| BGC823 | chr7 | 62129201 | 62133400 | 1.1303    | Copy gain    |
| BGC823 | chr7 | 62133401 | 62196400 | 0.743297  | Copy gain    |
| BGC823 | chr7 | 62196401 | 62201300 | 1.2513    | Copy gain    |
| BGC823 | chr7 | 62201301 | 62319600 | 0.718197  | Copy gain    |
| BGC823 | chr7 | 62319601 | 62324150 | 1.2318    | Copy gain    |
| BGC823 | chr7 | 62324151 | 62360200 | 0.739397  | Copy gain    |
| BGC823 | chr7 | 62360201 | 62365800 | 1.2643    | Copy gain    |
| BGC823 | chr7 | 62365801 | 62369300 | -0.174103 | Copy neutral |
| BGC823 | chr7 | 62369301 | 62541500 | 0.840997  | Copy gain    |
| BGC823 | chr7 | 62541501 | 62973750 | 0.359597  | Copy neutral |
| BGC823 | chr7 | 62973751 | 63041300 | 1.1367    | Copy gain    |
| BGC823 | chr7 | 63041301 | 63245700 | 0.558697  | Copy gain    |
| BGC823 | chr7 | 63245701 | 65249100 | 0.409597  | Copy neutral |
| BGC823 | chr7 | 65249101 | 65257500 | 1.4835    | Copy gain    |
| BGC823 | chr7 | 65257501 | 65259600 | 0.516297  | Copy gain    |
| BGC823 | chr7 | 65259601 | 65288300 | 1.5712    | Copy gain    |
| BGC823 | chr7 | 65288301 | 73549700 | 0.371697  | Copy neutral |
| BGC823 | chr7 | 73549701 | 73551100 | -6.3467   | Copy loss    |
| BGC823 | chr7 | 73551101 | 73589600 | 0.204797  | Copy neutral |
| BGC823 | chr7 | 73589601 | 73614100 | 0.581797  | Copy gain    |
| BGC823 | chr7 | 73614101 | 73828300 | 0.215997  | Copy neutral |
| BGC823 | chr7 | 73828301 | 73831100 | -1.6669   | Copy loss    |
| BGC823 | chr7 | 73831101 | 74004000 | 0.315297  | Copy neutral |
| BGC823 | chr7 | 74004001 | 74095000 | 0.143497  | Copy neutral |
| BGC823 | chr7 | 74095001 | 74328100 | 0.409097  | Copy neutral |
| BGC823 | chr7 | 74328101 | 74349100 | 1.2546    | Copy gain    |
| BGC823 | chr7 | 74349101 | 74715725 | 0.342397  | Copy neutral |
| BGC823 | chr7 | 74765724 | 76173650 | 0.342397  | Copy neutral |
| BGC823 | chr7 | 76173651 | 76231400 | 0.931197  | Copy gain    |
| BGC823 | chr7 | 76231401 | 76263950 | 0.422597  | Copy neutral |
| BGC823 | chr7 | 76263951 | 76575100 | 0.807997  | Copy gain    |
| BGC823 | chr7 | 76575101 | 77106400 | 0.563697  | Copy gain    |
| BGC823 | chr7 | 77106401 | 77161000 | 0.375097  | Copy neutral |
| BGC823 | chr7 | 77161001 | 77170100 | -0.115803 | Copy neutral |
| BGC823 | chr7 | 77170101 | 77261800 | 0.432997  | Copy neutral |
| BGC823 | chr7 | 77261801 | 77357000 | 0.176697  | Copy neutral |

|        |      |           |           |            |              |
|--------|------|-----------|-----------|------------|--------------|
| BGC823 | chr7 | 77357001  | 77616700  | 0.406297   | Copy neutral |
| BGC823 | chr7 | 77616701  | 79504600  | 0.512397   | Copy gain    |
| BGC823 | chr7 | 79504601  | 80547600  | 0.640497   | Copy gain    |
| BGC823 | chr7 | 80547601  | 81561900  | 0.561197   | Copy gain    |
| BGC823 | chr7 | 81561901  | 82705700  | 0.450197   | Copy gain    |
| BGC823 | chr7 | 82705701  | 82709200  | -1.1652    | Copy loss    |
| BGC823 | chr7 | 82709201  | 83164900  | 0.475497   | Copy gain    |
| BGC823 | chr7 | 83164901  | 84901600  | 0.593897   | Copy gain    |
| BGC823 | chr7 | 84901601  | 86340800  | 0.507197   | Copy gain    |
| BGC823 | chr7 | 86340801  | 87772300  | 0.560497   | Copy gain    |
| BGC823 | chr7 | 87772301  | 88351200  | 0.643797   | Copy gain    |
| BGC823 | chr7 | 88351201  | 89984300  | 0.528697   | Copy gain    |
| BGC823 | chr7 | 89984301  | 91215950  | 0.596597   | Copy gain    |
| BGC823 | chr7 | 91215951  | 91220850  | -6.2478    | Copy loss    |
| BGC823 | chr7 | 91220851  | 91424900  | 0.639897   | Copy gain    |
| BGC823 | chr7 | 91424901  | 91762300  | 0.520097   | Copy gain    |
| BGC823 | chr7 | 91762301  | 91784000  | 0.132097   | Copy neutral |
| BGC823 | chr7 | 91784001  | 92239000  | 0.557097   | Copy gain    |
| BGC823 | chr7 | 92239001  | 95687900  | 0.631997   | Copy gain    |
| BGC823 | chr7 | 95687901  | 96618200  | 0.538497   | Copy gain    |
| BGC823 | chr7 | 96618201  | 96658100  | 0.0447974  | Copy neutral |
| BGC823 | chr7 | 96658101  | 97288100  | 0.506397   | Copy gain    |
| BGC823 | chr7 | 97288101  | 97599600  | 0.665097   | Copy gain    |
| BGC823 | chr7 | 97599601  | 97722100  | 0.280997   | Copy neutral |
| BGC823 | chr7 | 97722101  | 97832700  | 0.528397   | Copy gain    |
| BGC823 | chr7 | 97832701  | 98081900  | 0.281997   | Copy neutral |
| BGC823 | chr7 | 98081901  | 98920500  | 0.436597   | Copy neutral |
| BGC823 | chr7 | 98920501  | 99166200  | 0.292097   | Copy neutral |
| BGC823 | chr7 | 99166201  | 99239700  | 0.592497   | Copy gain    |
| BGC823 | chr7 | 99239701  | 99404200  | 0.766597   | Copy gain    |
| BGC823 | chr7 | 99404201  | 99585500  | 0.588597   | Copy gain    |
| BGC823 | chr7 | 99585501  | 100556044 | 0.341897   | Copy neutral |
| BGC823 | chr7 | 100606043 | 102132100 | 0.341897   | Copy neutral |
| BGC823 | chr7 | 102132101 | 102445700 | 0.796697   | Copy gain    |
| BGC823 | chr7 | 102445701 | 102796400 | 0.579697   | Copy gain    |
| BGC823 | chr7 | 102796401 | 102928700 | 0.726897   | Copy gain    |
| BGC823 | chr7 | 102928701 | 104895700 | 0.525497   | Copy gain    |
| BGC823 | chr7 | 104895701 | 104913200 | 0.722797   | Copy gain    |
| BGC823 | chr7 | 104913201 | 105312900 | 0.307797   | Copy neutral |
| BGC823 | chr7 | 105312901 | 106565200 | 0.587397   | Copy gain    |
| BGC823 | chr7 | 106546801 | 107042400 | -0.0311295 | Copy neutral |
| BGC823 | chr7 | 106565201 | 109325300 | 0.525697   | Copy gain    |
| BGC823 | chr7 | 109325301 | 111660500 | 0.586197   | Copy gain    |
| BGC823 | chr7 | 111660501 | 111834100 | -0.0419026 | Copy neutral |
| BGC823 | chr7 | 111834101 | 112436800 | 0.546297   | Copy gain    |
| BGC823 | chr7 | 112436801 | 112438200 | -8.3671    | Copy loss    |
| BGC823 | chr7 | 112438201 | 114350600 | 0.516397   | Copy gain    |
| BGC823 | chr7 | 114350601 | 114407300 | 0.921397   | Copy gain    |
| BGC823 | chr7 | 114407301 | 115491600 | 0.523497   | Copy gain    |
| BGC823 | chr7 | 115491601 | 117796000 | 0.652797   | Copy gain    |
| BGC823 | chr7 | 117796001 | 126046200 | 0.515197   | Copy gain    |
| BGC823 | chr7 | 126046201 | 126051100 | -7.1837    | Copy loss    |

|        |      |           |           |            |              |
|--------|------|-----------|-----------|------------|--------------|
| BGC823 | chr7 | 126051101 | 130154524 | 0.526597   | Copy gain    |
| BGC823 | chr7 | 130254523 | 133924700 | 0.526597   | Copy gain    |
| BGC823 | chr7 | 133924701 | 139379378 | 0.900297   | Copy gain    |
| BGC823 | chr7 | 139404377 | 140497000 | 0.900297   | Copy gain    |
| BGC823 | chr7 | 140497001 | 142048196 | 0.490797   | Copy gain    |
| BGC823 | chr7 | 142098195 | 142276198 | 0.490797   | Copy gain    |
| BGC823 | chr7 | 142326197 | 143347898 | 0.490797   | Copy gain    |
| BGC823 | chr7 | 143397897 | 149551500 | 0.490797   | Copy gain    |
| BGC823 | chr7 | 149551501 | 149647750 | 0.840697   | Copy gain    |
| BGC823 | chr7 | 149647751 | 149715300 | 1.2742     | Copy gain    |
| BGC823 | chr7 | 149715301 | 149730700 | 0.998597   | Copy gain    |
| BGC823 | chr7 | 149730701 | 149739100 | -0.273603  | Copy neutral |
| BGC823 | chr7 | 149739101 | 149746800 | 0.676797   | Copy gain    |
| BGC823 | chr7 | 149746801 | 149764300 | 1.3399     | Copy gain    |
| BGC823 | chr7 | 149764301 | 149770600 | 0.722297   | Copy gain    |
| BGC823 | chr7 | 149770601 | 149807000 | 1.2316     | Copy gain    |
| BGC823 | chr7 | 149807001 | 149809100 | 0.170097   | Copy neutral |
| BGC823 | chr7 | 149809101 | 149863700 | 1.1564     | Copy gain    |
| BGC823 | chr7 | 149863701 | 150009300 | 0.812697   | Copy gain    |
| BGC823 | chr7 | 150009301 | 154270635 | 0.503197   | Copy gain    |
| BGC823 | chr7 | 154370634 | 159128664 | 0.503197   | Copy gain    |
| BGC823 | chr7 | 159138663 | 159138663 | 0.503197   | Copy gain    |
| BGC823 | chr8 | 10000     | 594300    | -0.178803  | Copy neutral |
| BGC823 | chr8 | 594301    | 599200    | -8.2599    | Copy loss    |
| BGC823 | chr8 | 599201    | 2193800   | -0.151703  | Copy neutral |
| BGC823 | chr8 | 2193801   | 2250500   | 0.826097   | Copy gain    |
| BGC823 | chr8 | 2250501   | 2265200   | -0.0916026 | Copy neutral |
| BGC823 | chr8 | 2265201   | 2287250   | 0.818297   | Copy gain    |
| BGC823 | chr8 | 2287251   | 7029050   | -0.125203  | Copy neutral |
| BGC823 | chr8 | 7029051   | 7054600   | -3.7906    | Copy loss    |
| BGC823 | chr8 | 7054601   | 7474650   | -0.391403  | Copy neutral |
| BGC823 | chr8 | 7524649   | 7935200   | -0.391403  | Copy neutral |
| BGC823 | chr8 | 7935201   | 7957250   | -5.6187    | Copy loss    |
| BGC823 | chr8 | 7957251   | 7988050   | -2.0946    | Copy loss    |
| BGC823 | chr8 | 7988051   | 8088150   | 0.879697   | Copy gain    |
| BGC823 | chr8 | 8088151   | 8850100   | -0.0315026 | Copy neutral |
| BGC823 | chr8 | 8850101   | 8852900   | -1.3595    | Copy loss    |
| BGC823 | chr8 | 8852901   | 11492600  | -0.0688026 | Copy neutral |
| BGC823 | chr8 | 11492601  | 11494700  | -8.3671    | Copy loss    |
| BGC823 | chr8 | 11494701  | 11529700  | 0.0504974  | Copy neutral |
| BGC823 | chr8 | 11529701  | 11827900  | -0.0980026 | Copy neutral |
| BGC823 | chr8 | 11827901  | 11923100  | 0.111597   | Copy neutral |
| BGC823 | chr8 | 11923101  | 11956700  | -3.0368    | Copy loss    |
| BGC823 | chr8 | 11956701  | 12074300  | -0.0533026 | Copy neutral |
| BGC823 | chr8 | 12074301  | 12091855  | -2.3977    | Copy loss    |
| BGC823 | chr8 | 12141854  | 12160400  | -2.3977    | Copy loss    |
| BGC823 | chr8 | 12160401  | 12176850  | -0.935903  | Copy loss    |
| BGC823 | chr8 | 12176851  | 12236000  | 0.278997   | Copy neutral |
| BGC823 | chr8 | 12236001  | 12262250  | 0.819797   | Copy gain    |
| BGC823 | chr8 | 12262251  | 12374600  | -0.817603  | Copy loss    |
| BGC823 | chr8 | 12374601  | 12391400  | 0.907397   | Copy gain    |
| BGC823 | chr8 | 12391401  | 12448100  | 1.8633     | Copy gain    |

|        |      |          |          |             |              |
|--------|------|----------|----------|-------------|--------------|
| BGC823 | chr8 | 12448101 | 12456500 | 1.1886      | Copy gain    |
| BGC823 | chr8 | 12456501 | 12463150 | 0.163197    | Copy neutral |
| BGC823 | chr8 | 12463151 | 12504800 | -0.937703   | Copy loss    |
| BGC823 | chr8 | 12504801 | 25067000 | -0.00590263 | Copy neutral |
| BGC823 | chr8 | 25067001 | 25070500 | -8.217      | Copy loss    |
| BGC823 | chr8 | 25070501 | 25578700 | -0.0661026  | Copy neutral |
| BGC823 | chr8 | 25578701 | 25590600 | 0.711097    | Copy gain    |
| BGC823 | chr8 | 25590601 | 25892300 | -0.0255026  | Copy neutral |
| BGC823 | chr8 | 25892301 | 25912600 | -0.426703   | Copy neutral |
| BGC823 | chr8 | 25912601 | 26065900 | 9.73677E-05 | Copy neutral |
| BGC823 | chr8 | 26065901 | 26128900 | -0.260503   | Copy neutral |
| BGC823 | chr8 | 26128901 | 26231100 | 0.0390974   | Copy neutral |
| BGC823 | chr8 | 26231101 | 26268900 | -1.1838     | Copy loss    |
| BGC823 | chr8 | 26268901 | 32680200 | -0.0241026  | Copy neutral |
| BGC823 | chr8 | 32680201 | 32690700 | -8.3671     | Copy loss    |
| BGC823 | chr8 | 32690701 | 37529800 | -0.0198026  | Copy neutral |
| BGC823 | chr8 | 37529801 | 38439800 | -0.206003   | Copy neutral |
| BGC823 | chr8 | 38439801 | 38861900 | -0.0504026  | Copy neutral |
| BGC823 | chr8 | 38861901 | 39743200 | 0.122397    | Copy neutral |
| BGC823 | chr8 | 39743201 | 39909800 | -0.142803   | Copy neutral |
| BGC823 | chr8 | 39909801 | 40550300 | 0.0452974   | Copy neutral |
| BGC823 | chr8 | 40550301 | 40774300 | -0.0793026  | Copy neutral |
| BGC823 | chr8 | 40774301 | 40779900 | -1.0187     | Copy loss    |
| BGC823 | chr8 | 40779901 | 41054300 | -0.0614026  | Copy neutral |
| BGC823 | chr8 | 41054301 | 41097000 | 0.189697    | Copy neutral |
| BGC823 | chr8 | 41097001 | 41277600 | -0.106403   | Copy neutral |
| BGC823 | chr8 | 41277601 | 41288800 | -0.566403   | Copy loss    |
| BGC823 | chr8 | 41288801 | 41372800 | -0.00950263 | Copy neutral |
| BGC823 | chr8 | 41372801 | 41440700 | -0.277903   | Copy neutral |
| BGC823 | chr8 | 41440701 | 41897100 | -0.0426026  | Copy neutral |
| BGC823 | chr8 | 41897101 | 43749300 | -0.182503   | Copy neutral |
| BGC823 | chr8 | 43749301 | 43821050 | 0.174097    | Copy neutral |
| BGC823 | chr8 | 43821051 | 43838888 | 5.2779      | Copy gain    |
| BGC823 | chr8 | 46838887 | 46856600 | 5.2779      | Copy gain    |
| BGC823 | chr8 | 46856601 | 48130500 | -0.0256026  | Copy neutral |
| BGC823 | chr8 | 48135599 | 67758600 | -0.0256026  | Copy neutral |
| BGC823 | chr8 | 67758601 | 67930100 | 0.416997    | Copy neutral |
| BGC823 | chr8 | 67930101 | 70828800 | -0.106203   | Copy neutral |
| BGC823 | chr8 | 70828801 | 71019200 | -0.498003   | Copy loss    |
| BGC823 | chr8 | 71019201 | 86576452 | -0.0190026  | Copy neutral |
| BGC823 | chr8 | 86726451 | 95981200 | -0.0190026  | Copy neutral |
| BGC823 | chr8 | 95981201 | 96033700 | -1.2798     | Copy loss    |
| BGC823 | chr8 | 96033701 | 96875100 | 0.0302974   | Copy neutral |
| BGC823 | chr8 | 96875101 | 96880000 | -1.3675     | Copy loss    |
| BGC823 | chr8 | 96880001 | 97119400 | 0.0290974   | Copy neutral |
| BGC823 | chr8 | 97119401 | 97519800 | -0.107403   | Copy neutral |
| BGC823 | chr8 | 97519801 | 97521900 | -1.4695     | Copy loss    |
| BGC823 | chr8 | 97521901 | 97673100 | -0.148603   | Copy neutral |
| BGC823 | chr8 | 97673101 | 98573300 | 0.0307974   | Copy neutral |
| BGC823 | chr8 | 98573301 | 98744100 | -0.157003   | Copy neutral |
| BGC823 | chr8 | 98744101 | 98764400 | -0.641903   | Copy loss    |
| BGC823 | chr8 | 98764401 | 99178100 | -0.166503   | Copy neutral |

|        |      |           |           |            |              |
|--------|------|-----------|-----------|------------|--------------|
| BGC823 | chr8 | 99178101  | 100048900 | 0.0540974  | Copy neutral |
| BGC823 | chr8 | 100048901 | 100518600 | -0.853303  | Copy loss    |
| BGC823 | chr8 | 100518601 | 101593100 | 0.0180974  | Copy neutral |
| BGC823 | chr8 | 101593101 | 102006100 | -0.0974026 | Copy neutral |
| BGC823 | chr8 | 102006101 | 103416600 | 0.0244974  | Copy neutral |
| BGC823 | chr8 | 103416601 | 103489400 | -0.337303  | Copy neutral |
| BGC823 | chr8 | 103489401 | 104129900 | -0.0259026 | Copy neutral |
| BGC823 | chr8 | 104129901 | 104319600 | -1.0539    | Copy loss    |
| BGC823 | chr8 | 104319601 | 111805400 | -0.0207026 | Copy neutral |
| BGC823 | chr8 | 111805401 | 113079050 | 0.565397   | Copy gain    |
| BGC823 | chr8 | 113079051 | 113089200 | -0.982203  | Copy loss    |
| BGC823 | chr8 | 113089201 | 115362800 | 0.565697   | Copy gain    |
| BGC823 | chr8 | 115362801 | 116680200 | 0.639897   | Copy gain    |
| BGC823 | chr8 | 116680201 | 116681600 | -1.3562    | Copy loss    |
| BGC823 | chr8 | 116681601 | 118801900 | 0.677797   | Copy gain    |
| BGC823 | chr8 | 118801901 | 119224700 | 0.0306974  | Copy neutral |
| BGC823 | chr8 | 119224701 | 120154300 | 0.156997   | Copy neutral |
| BGC823 | chr8 | 120154301 | 120161300 | -0.550803  | Copy loss    |
| BGC823 | chr8 | 120161301 | 120370600 | 0.173997   | Copy neutral |
| BGC823 | chr8 | 120370601 | 120554000 | 0.0670974  | Copy neutral |
| BGC823 | chr8 | 120554001 | 120835400 | -0.0776026 | Copy neutral |
| BGC823 | chr8 | 120835401 | 120994300 | -0.244003  | Copy neutral |
| BGC823 | chr8 | 120994301 | 121109100 | -0.0220026 | Copy neutral |
| BGC823 | chr8 | 121109101 | 124258400 | 0.174697   | Copy neutral |
| BGC823 | chr8 | 124258401 | 124563600 | 0.498397   | Copy gain    |
| BGC823 | chr8 | 124563601 | 125174000 | 0.637997   | Copy gain    |
| BGC823 | chr8 | 125174001 | 126019600 | 0.540897   | Copy gain    |
| BGC823 | chr8 | 126019601 | 126363300 | 1.0594     | Copy gain    |
| BGC823 | chr8 | 126363301 | 126439600 | 0.868797   | Copy gain    |
| BGC823 | chr8 | 126439601 | 126445200 | 0.316797   | Copy neutral |
| BGC823 | chr8 | 126445201 | 126513100 | 1.0626     | Copy gain    |
| BGC823 | chr8 | 126513101 | 126973000 | 0.732897   | Copy gain    |
| BGC823 | chr8 | 126973001 | 128036300 | 0.605197   | Copy gain    |
| BGC823 | chr8 | 128036301 | 128228100 | 0.701897   | Copy gain    |
| BGC823 | chr8 | 128228101 | 128230200 | 0.855897   | Copy gain    |
| BGC823 | chr8 | 128230201 | 128233700 | 3.6341     | Copy gain    |
| BGC823 | chr8 | 128233701 | 128241400 | 2.7327     | Copy gain    |
| BGC823 | chr8 | 128241401 | 128325750 | 1.1075     | Copy gain    |
| BGC823 | chr8 | 128325751 | 128329950 | 0.162497   | Copy neutral |
| BGC823 | chr8 | 128329951 | 128746800 | 1.1235     | Copy gain    |
| BGC823 | chr8 | 128746801 | 128752400 | 0.160897   | Copy neutral |
| BGC823 | chr8 | 128752401 | 129042200 | 0.979297   | Copy gain    |
| BGC823 | chr8 | 129042201 | 129620400 | 1.109      | Copy gain    |
| BGC823 | chr8 | 129620401 | 130141200 | 1.0063     | Copy gain    |
| BGC823 | chr8 | 130141201 | 130144700 | -1.0171    | Copy loss    |
| BGC823 | chr8 | 130144701 | 130516400 | 1.0173     | Copy gain    |
| BGC823 | chr8 | 130516401 | 130829300 | 1.1289     | Copy gain    |
| BGC823 | chr8 | 130829301 | 130934300 | 1.016      | Copy gain    |
| BGC823 | chr8 | 130934301 | 131065200 | 0.862297   | Copy gain    |
| BGC823 | chr8 | 131065201 | 131201700 | 1.0445     | Copy gain    |
| BGC823 | chr8 | 131201701 | 131210100 | -1.3205    | Copy loss    |
| BGC823 | chr8 | 131210101 | 132135500 | 1.0619     | Copy gain    |

|        |      |           |           |            |              |
|--------|------|-----------|-----------|------------|--------------|
| BGC823 | chr8 | 132135501 | 132180300 | 1.3623     | Copy gain    |
| BGC823 | chr8 | 132180301 | 132277600 | 0.973397   | Copy gain    |
| BGC823 | chr8 | 132277601 | 132280400 | -0.650803  | Copy loss    |
| BGC823 | chr8 | 132280401 | 133840000 | 0.982297   | Copy gain    |
| BGC823 | chr8 | 133840001 | 135069200 | 1.0871     | Copy gain    |
| BGC823 | chr8 | 135069201 | 135707600 | 1.0096     | Copy gain    |
| BGC823 | chr8 | 135707601 | 135710400 | 0.0746974  | Copy neutral |
| BGC823 | chr8 | 135710401 | 137160100 | 0.951797   | Copy gain    |
| BGC823 | chr8 | 137160101 | 137163600 | -8.217     | Copy loss    |
| BGC823 | chr8 | 137163601 | 142766516 | 0.924797   | Copy gain    |
| BGC823 | chr8 | 142816515 | 144089400 | 0.924797   | Copy gain    |
| BGC823 | chr8 | 144089401 | 144286100 | 0.813997   | Copy gain    |
| BGC823 | chr8 | 144286101 | 144403700 | 0.642397   | Copy gain    |
| BGC823 | chr8 | 144403701 | 144405100 | -0.574203  | Copy loss    |
| BGC823 | chr8 | 144405101 | 144528300 | 0.668397   | Copy gain    |
| BGC823 | chr8 | 144528301 | 144545100 | 1.0106     | Copy gain    |
| BGC823 | chr8 | 144545101 | 144721500 | 0.646697   | Copy gain    |
| BGC823 | chr8 | 144721501 | 144759300 | 0.979397   | Copy gain    |
| BGC823 | chr8 | 144759301 | 144861500 | 0.654097   | Copy gain    |
| BGC823 | chr8 | 144861501 | 144867100 | 1.401      | Copy gain    |
| BGC823 | chr8 | 144867101 | 144872000 | 0.843397   | Copy gain    |
| BGC823 | chr8 | 144872001 | 144877600 | 0.281597   | Copy neutral |
| BGC823 | chr8 | 144877601 | 144941300 | 0.774697   | Copy gain    |
| BGC823 | chr8 | 144941301 | 145028800 | 0.344497   | Copy neutral |
| BGC823 | chr8 | 145028801 | 145066600 | 0.616397   | Copy gain    |
| BGC823 | chr8 | 145066601 | 145089000 | 1.0078     | Copy gain    |
| BGC823 | chr8 | 145089001 | 145332589 | 0.662497   | Copy gain    |
| BGC823 | chr8 | 145432588 | 145759600 | 0.662497   | Copy gain    |
| BGC823 | chr8 | 145759601 | 145907300 | 0.921597   | Copy gain    |
| BGC823 | chr8 | 145907301 | 145915700 | 0.216497   | Copy neutral |
| BGC823 | chr8 | 145915701 | 146144600 | 0.838397   | Copy gain    |
| BGC823 | chr8 | 146144601 | 146246800 | 1.0769     | Copy gain    |
| BGC823 | chr8 | 146246801 | 146253800 | 1.837      | Copy gain    |
| BGC823 | chr8 | 146253801 | 146300700 | 1.0244     | Copy gain    |
| BGC823 | chr8 | 146300701 | 146304023 | -4.2421    | Copy loss    |
| BGC823 | chr8 | 146364022 | 146364022 | -4.2421    | Copy loss    |
| BGC823 | chr9 | 10000     | 48300     | -0.0339026 | Copy neutral |
| BGC823 | chr9 | 48301     | 203000    | -0.595503  | Copy loss    |
| BGC823 | chr9 | 203001    | 415800    | -1.109     | Copy loss    |
| BGC823 | chr9 | 415801    | 807800    | 0.592197   | Copy gain    |
| BGC823 | chr9 | 807801    | 875000    | 0.245197   | Copy neutral |
| BGC823 | chr9 | 875001    | 3533600   | 0.545697   | Copy gain    |
| BGC823 | chr9 | 3533601   | 4472300   | 0.665297   | Copy gain    |
| BGC823 | chr9 | 4472301   | 5016900   | 0.548797   | Copy gain    |
| BGC823 | chr9 | 5016901   | 6393800   | 0.657597   | Copy gain    |
| BGC823 | chr9 | 6393801   | 6597500   | 0.483697   | Copy gain    |
| BGC823 | chr9 | 6597501   | 6808550   | 0.252097   | Copy neutral |
| BGC823 | chr9 | 6808551   | 8668100   | 0.572697   | Copy gain    |
| BGC823 | chr9 | 8668101   | 8798300   | 1.2024     | Copy gain    |
| BGC823 | chr9 | 8798301   | 9097200   | 1.7292     | Copy gain    |
| BGC823 | chr9 | 9097201   | 9098600   | 0.760597   | Copy gain    |
| BGC823 | chr9 | 9098601   | 9120300   | 1.2845     | Copy gain    |

|        |      |          |          |            |              |
|--------|------|----------|----------|------------|--------------|
| BGC823 | chr9 | 9120301  | 9128700  | 1.7775     | Copy gain    |
| BGC823 | chr9 | 9128701  | 10165400 | 1.2983     | Copy gain    |
| BGC823 | chr9 | 10165401 | 10225600 | 1.1279     | Copy gain    |
| BGC823 | chr9 | 10225601 | 10297000 | 1.3466     | Copy gain    |
| BGC823 | chr9 | 10297001 | 10322900 | 0.991997   | Copy gain    |
| BGC823 | chr9 | 10322901 | 10631600 | 0.885297   | Copy gain    |
| BGC823 | chr9 | 10631601 | 11941300 | 0.506897   | Copy gain    |
| BGC823 | chr9 | 11941301 | 14736400 | 0.560297   | Copy gain    |
| BGC823 | chr9 | 14736401 | 15084300 | 0.488397   | Copy gain    |
| BGC823 | chr9 | 15084301 | 15554000 | 0.402797   | Copy neutral |
| BGC823 | chr9 | 15554001 | 15815100 | 0.588797   | Copy gain    |
| BGC823 | chr9 | 15815101 | 15821750 | -0.537303  | Copy loss    |
| BGC823 | chr9 | 15821751 | 16725800 | 0.581697   | Copy gain    |
| BGC823 | chr9 | 16725801 | 16986200 | 0.369597   | Copy neutral |
| BGC823 | chr9 | 16986201 | 17142300 | 0.535797   | Copy gain    |
| BGC823 | chr9 | 17142301 | 17905300 | 0.672897   | Copy gain    |
| BGC823 | chr9 | 17905301 | 17913700 | -0.157903  | Copy neutral |
| BGC823 | chr9 | 17913701 | 18279100 | 0.710797   | Copy gain    |
| BGC823 | chr9 | 18279101 | 18937100 | 0.605797   | Copy gain    |
| BGC823 | chr9 | 18937101 | 19007100 | 0.683997   | Copy gain    |
| BGC823 | chr9 | 19007101 | 19065200 | 0.511997   | Copy gain    |
| BGC823 | chr9 | 19065201 | 19284300 | 0.304997   | Copy neutral |
| BGC823 | chr9 | 19284301 | 19478900 | 0.469897   | Copy gain    |
| BGC823 | chr9 | 19478901 | 20367200 | 0.591897   | Copy gain    |
| BGC823 | chr9 | 20367201 | 22087100 | 0.0529974  | Copy neutral |
| BGC823 | chr9 | 22087101 | 22495900 | 0.177697   | Copy neutral |
| BGC823 | chr9 | 22495901 | 22503250 | -0.816103  | Copy loss    |
| BGC823 | chr9 | 22503251 | 22810900 | 0.0782974  | Copy neutral |
| BGC823 | chr9 | 22810901 | 25888100 | -0.0499026 | Copy neutral |
| BGC823 | chr9 | 25888101 | 26818400 | 0.0342974  | Copy neutral |
| BGC823 | chr9 | 26818401 | 27139700 | -0.123003  | Copy neutral |
| BGC823 | chr9 | 27139701 | 29476300 | 0.0246974  | Copy neutral |
| BGC823 | chr9 | 29476301 | 31556000 | -0.0267026 | Copy neutral |
| BGC823 | chr9 | 31556001 | 33383000 | 0.0299974  | Copy neutral |
| BGC823 | chr9 | 33383001 | 33403300 | 0.488697   | Copy gain    |
| BGC823 | chr9 | 33403301 | 33474000 | -0.0466026 | Copy neutral |
| BGC823 | chr9 | 33474001 | 33484500 | -0.711203  | Copy loss    |
| BGC823 | chr9 | 33484501 | 33512500 | -0.0764026 | Copy neutral |
| BGC823 | chr9 | 33512501 | 33821200 | 0.147797   | Copy neutral |
| BGC823 | chr9 | 33821201 | 34354600 | -0.275903  | Copy neutral |
| BGC823 | chr9 | 34354601 | 35033600 | 0.0208974  | Copy neutral |
| BGC823 | chr9 | 35033601 | 35191100 | -0.176003  | Copy neutral |
| BGC823 | chr9 | 35191101 | 35250600 | 0.0444974  | Copy neutral |
| BGC823 | chr9 | 35250601 | 35253400 | -0.800003  | Copy loss    |
| BGC823 | chr9 | 35253401 | 35476000 | 0.0666974  | Copy neutral |
| BGC823 | chr9 | 35476001 | 35630000 | -0.0711026 | Copy neutral |
| BGC823 | chr9 | 35630001 | 35633500 | -0.945603  | Copy loss    |
| BGC823 | chr9 | 35633501 | 35792400 | -0.0622026 | Copy neutral |
| BGC823 | chr9 | 35792401 | 35913500 | 0.0801974  | Copy neutral |
| BGC823 | chr9 | 35913501 | 35914900 | 1.9709     | Copy gain    |
| BGC823 | chr9 | 35914901 | 36152200 | -0.0112026 | Copy neutral |
| BGC823 | chr9 | 36152201 | 36336300 | -0.194603  | Copy neutral |



|        |      |          |          |            |              |
|--------|------|----------|----------|------------|--------------|
| BGC823 | chr9 | 36336301 | 36416100 | -0.0364026 | Copy neutral |
| BGC823 | chr9 | 36416101 | 36663200 | -0.318603  | Copy neutral |
| BGC823 | chr9 | 36663201 | 39216100 | -0.0723026 | Copy neutral |
| BGC823 | chr9 | 39216101 | 39663687 | -0.828403  | Copy loss    |
| BGC823 | chr9 | 39713686 | 39974797 | -0.828403  | Copy loss    |
| BGC823 | chr9 | 40024796 | 40233030 | -0.828403  | Copy loss    |
| BGC823 | chr9 | 40283029 | 40425835 | -0.828403  | Copy loss    |
| BGC823 | chr9 | 40475834 | 40940342 | 0.373497   | Copy neutral |
| BGC823 | chr9 | 40990341 | 41143215 | 0.373497   | Copy neutral |
| BGC823 | chr9 | 41193214 | 41350400 | 0.373497   | Copy neutral |
| BGC823 | chr9 | 41350401 | 41365794 | -7.6164    | Copy loss    |
| BGC823 | chr9 | 41415793 | 41798050 | -7.6164    | Copy loss    |
| BGC823 | chr9 | 41798051 | 41968150 | 1.5816     | Copy gain    |
| BGC823 | chr9 | 41968151 | 42200550 | 0.451297   | Copy gain    |
| BGC823 | chr9 | 42200551 | 42613956 | -0.455903  | Copy loss    |
| BGC823 | chr9 | 42663955 | 43213699 | -0.455903  | Copy loss    |
| BGC823 | chr9 | 43313698 | 43415050 | -0.455903  | Copy loss    |
| BGC823 | chr9 | 43415051 | 43466850 | -5.4869    | Copy loss    |
| BGC823 | chr9 | 43466851 | 43571850 | -1.6789    | Copy loss    |
| BGC823 | chr9 | 43571851 | 43625750 | -5.5365    | Copy loss    |
| BGC823 | chr9 | 43625751 | 43771700 | -0.0544026 | Copy neutral |
| BGC823 | chr9 | 43771701 | 43843800 | 0.492597   | Copy gain    |
| BGC823 | chr9 | 43843801 | 43856400 | 1.1506     | Copy gain    |
| BGC823 | chr9 | 43856401 | 43946570 | 0.467697   | Copy gain    |
| BGC823 | chr9 | 43996569 | 44069900 | 0.467697   | Copy gain    |
| BGC823 | chr9 | 44069901 | 44071300 | 4.2099     | Copy gain    |
| BGC823 | chr9 | 44071301 | 44242450 | 0.146797   | Copy neutral |
| BGC823 | chr9 | 44242451 | 44284450 | -0.996103  | Copy loss    |
| BGC823 | chr9 | 44284451 | 44676647 | -0.430703  | Copy neutral |
| BGC823 | chr9 | 44726646 | 44777600 | -0.430703  | Copy neutral |
| BGC823 | chr9 | 44777601 | 44793350 | -1.1204    | Copy loss    |
| BGC823 | chr9 | 44793351 | 44805600 | 0.355597   | Copy neutral |
| BGC823 | chr9 | 44805601 | 44874900 | -0.419703  | Copy neutral |
| BGC823 | chr9 | 44874901 | 44908294 | 0.742997   | Copy gain    |
| BGC823 | chr9 | 44958293 | 45250204 | 0.742997   | Copy gain    |
| BGC823 | chr9 | 45350203 | 45815522 | 0.742997   | Copy gain    |
| BGC823 | chr9 | 45865521 | 46216431 | 0.742997   | Copy gain    |
| BGC823 | chr9 | 46266430 | 46461040 | 0.742997   | Copy gain    |
| BGC823 | chr9 | 46561039 | 47060134 | 0.742997   | Copy gain    |
| BGC823 | chr9 | 47160133 | 47317680 | 0.742997   | Copy gain    |
| BGC823 | chr9 | 65467679 | 65608200 | 0.742997   | Copy gain    |
| BGC823 | chr9 | 65608201 | 65918361 | -0.152903  | Copy neutral |
| BGC823 | chr9 | 65968360 | 66130400 | -0.152903  | Copy neutral |
| BGC823 | chr9 | 66130401 | 66192216 | 0.594197   | Copy gain    |
| BGC823 | chr9 | 66242215 | 66265500 | 0.594197   | Copy gain    |
| BGC823 | chr9 | 66265501 | 66312050 | -0.450203  | Copy loss    |
| BGC823 | chr9 | 66312051 | 66399550 | 0.0975974  | Copy neutral |
| BGC823 | chr9 | 66399551 | 66404657 | 3.0809     | Copy gain    |
| BGC823 | chr9 | 66454656 | 66486700 | 3.0809     | Copy gain    |
| BGC823 | chr9 | 66486701 | 66614196 | 1.7629     | Copy gain    |
| BGC823 | chr9 | 66664195 | 66863344 | 1.7629     | Copy gain    |
| BGC823 | chr9 | 66913343 | 67107835 | 1.7629     | Copy gain    |

|        |      |           |           |            |              |
|--------|------|-----------|-----------|------------|--------------|
| BGC823 | chr9 | 67207834  | 67340000  | 1.7629     | Copy gain    |
| BGC823 | chr9 | 67340001  | 67366297  | 0.241697   | Copy neutral |
| BGC823 | chr9 | 67516296  | 67987999  | 0.241697   | Copy neutral |
| BGC823 | chr9 | 68137998  | 68349400  | 0.241697   | Copy neutral |
| BGC823 | chr9 | 68349401  | 68393500  | 1.5737     | Copy gain    |
| BGC823 | chr9 | 68393501  | 68408200  | 2.8636     | Copy gain    |
| BGC823 | chr9 | 68408201  | 68413800  | 1.7335     | Copy gain    |
| BGC823 | chr9 | 68413801  | 68434100  | 3.8157     | Copy gain    |
| BGC823 | chr9 | 68434101  | 68505500  | 1.9176     | Copy gain    |
| BGC823 | chr9 | 68505501  | 68514182  | 0.851397   | Copy gain    |
| BGC823 | chr9 | 68664181  | 68838947  | 0.851397   | Copy gain    |
| BGC823 | chr9 | 68988946  | 69087900  | 1.8958     | Copy gain    |
| BGC823 | chr9 | 69087901  | 69278386  | 0.375997   | Copy neutral |
| BGC823 | chr9 | 69328385  | 69785800  | 0.375997   | Copy neutral |
| BGC823 | chr9 | 69785801  | 69787200  | -8.3671    | Copy loss    |
| BGC823 | chr9 | 69787201  | 69797000  | 0.532397   | Copy gain    |
| BGC823 | chr9 | 69797001  | 69858250  | 1.4882     | Copy gain    |
| BGC823 | chr9 | 69858251  | 69947150  | -0.0213026 | Copy neutral |
| BGC823 | chr9 | 69947151  | 69996150  | 1.0259     | Copy gain    |
| BGC823 | chr9 | 69996151  | 70010543  | 0.426797   | Copy neutral |
| BGC823 | chr9 | 70060542  | 70218730  | 0.426797   | Copy neutral |
| BGC823 | chr9 | 70318729  | 70506536  | 0.426797   | Copy neutral |
| BGC823 | chr9 | 70556535  | 70735469  | 0.426797   | Copy neutral |
| BGC823 | chr9 | 70835468  | 70880950  | 2.0196     | Copy gain    |
| BGC823 | chr9 | 70880951  | 70945000  | 0.0733974  | Copy neutral |
| BGC823 | chr9 | 70945001  | 71021300  | 0.759697   | Copy gain    |
| BGC823 | chr9 | 71021301  | 71601600  | 0.527997   | Copy gain    |
| BGC823 | chr9 | 71601601  | 71738100  | 0.306997   | Copy neutral |
| BGC823 | chr9 | 71738101  | 71743000  | -8.2599    | Copy loss    |
| BGC823 | chr9 | 71743001  | 91045500  | 0.537797   | Copy gain    |
| BGC823 | chr9 | 91045501  | 91140000  | -0.127103  | Copy neutral |
| BGC823 | chr9 | 91140001  | 92343417  | 0.533697   | Copy gain    |
| BGC823 | chr9 | 92443416  | 92528797  | 0.533697   | Copy gain    |
| BGC823 | chr9 | 92678796  | 93068500  | 0.533697   | Copy gain    |
| BGC823 | chr9 | 93068501  | 115026800 | -0.0277026 | Copy neutral |
| BGC823 | chr9 | 115026801 | 115075100 | -1.0041    | Copy loss    |
| BGC823 | chr9 | 115075101 | 117327700 | -0.0135026 | Copy neutral |
| BGC823 | chr9 | 117327701 | 117353600 | -0.416203  | Copy neutral |
| BGC823 | chr9 | 117353601 | 117516700 | -0.0221026 | Copy neutral |
| BGC823 | chr9 | 117516701 | 119304500 | 0.111097   | Copy neutral |
| BGC823 | chr9 | 119304501 | 121300900 | 0.0293974  | Copy neutral |
| BGC823 | chr9 | 121300901 | 122602900 | 0.947797   | Copy gain    |
| BGC823 | chr9 | 122602901 | 123316900 | 1.0348     | Copy gain    |
| BGC823 | chr9 | 123316901 | 123601800 | 0.916197   | Copy gain    |
| BGC823 | chr9 | 123601801 | 123606000 | 0.174097   | Copy neutral |
| BGC823 | chr9 | 123606001 | 124218500 | 0.969597   | Copy gain    |
| BGC823 | chr9 | 124218501 | 124305300 | 0.778397   | Copy gain    |
| BGC823 | chr9 | 124305301 | 124313700 | 0.361997   | Copy neutral |
| BGC823 | chr9 | 124313701 | 124415200 | 0.825797   | Copy gain    |
| BGC823 | chr9 | 124415201 | 124533500 | 0.941897   | Copy gain    |
| BGC823 | chr9 | 124533501 | 124616100 | 0.783797   | Copy gain    |
| BGC823 | chr9 | 124616101 | 124721800 | 0.943897   | Copy gain    |

|        |       |           |           |            |              |
|--------|-------|-----------|-----------|------------|--------------|
| BGC823 | chr9  | 124721801 | 124762400 | 0.563897   | Copy gain    |
| BGC823 | chr9  | 124762401 | 124766600 | -0.0300026 | Copy neutral |
| BGC823 | chr9  | 124766601 | 124837300 | 0.548197   | Copy gain    |
| BGC823 | chr9  | 124837301 | 124989200 | 0.904997   | Copy gain    |
| BGC823 | chr9  | 124989201 | 124991300 | -0.324003  | Copy neutral |
| BGC823 | chr9  | 124991301 | 125573700 | 1.0209     | Copy gain    |
| BGC823 | chr9  | 125573701 | 125788600 | 0.819297   | Copy gain    |
| BGC823 | chr9  | 125788601 | 125813100 | 1.0476     | Copy gain    |
| BGC823 | chr9  | 125813101 | 125820800 | 0.462097   | Copy gain    |
| BGC823 | chr9  | 125820801 | 126029400 | 1.0279     | Copy gain    |
| BGC823 | chr9  | 126029401 | 126083300 | 0.774597   | Copy gain    |
| BGC823 | chr9  | 126083301 | 126116200 | 1.0196     | Copy gain    |
| BGC823 | chr9  | 126116201 | 126175700 | 0.743297   | Copy gain    |
| BGC823 | chr9  | 126175701 | 126733600 | 1.0017     | Copy gain    |
| BGC823 | chr9  | 126733601 | 126736400 | 1.8254     | Copy gain    |
| BGC823 | chr9  | 126736401 | 126757400 | 1.0936     | Copy gain    |
| BGC823 | chr9  | 126757401 | 126773500 | 0.778997   | Copy gain    |
| BGC823 | chr9  | 126773501 | 126781900 | 0.229597   | Copy neutral |
| BGC823 | chr9  | 126781901 | 126786100 | 0.746397   | Copy gain    |
| BGC823 | chr9  | 126786101 | 127197000 | 0.862197   | Copy gain    |
| BGC823 | chr9  | 127197001 | 127276100 | 0.678297   | Copy gain    |
| BGC823 | chr9  | 127276101 | 127531600 | 0.983597   | Copy gain    |
| BGC823 | chr9  | 127531601 | 127948800 | 0.831697   | Copy gain    |
| BGC823 | chr9  | 127948801 | 128033500 | 0.619997   | Copy gain    |
| BGC823 | chr9  | 128033501 | 128099300 | 0.797997   | Copy gain    |
| BGC823 | chr9  | 128099301 | 128127300 | 1.0705     | Copy gain    |
| BGC823 | chr9  | 128127301 | 128215500 | 0.768797   | Copy gain    |
| BGC823 | chr9  | 128215501 | 128424100 | 1.0317     | Copy gain    |
| BGC823 | chr9  | 128424101 | 128473100 | 0.916497   | Copy gain    |
| BGC823 | chr9  | 128473101 | 128485000 | 0.399297   | Copy neutral |
| BGC823 | chr9  | 128485001 | 128502500 | 0.862597   | Copy gain    |
| BGC823 | chr9  | 128502501 | 128503900 | -2.5288    | Copy loss    |
| BGC823 | chr9  | 128503901 | 129241700 | 0.915497   | Copy gain    |
| BGC823 | chr9  | 129241701 | 129591000 | 0.768497   | Copy gain    |
| BGC823 | chr9  | 129591001 | 129681300 | 0.884197   | Copy gain    |
| BGC823 | chr9  | 129681301 | 130033400 | 1.0831     | Copy gain    |
| BGC823 | chr9  | 130033401 | 130034800 | -1.1584    | Copy loss    |
| BGC823 | chr9  | 130034801 | 130149600 | 1.0272     | Copy gain    |
| BGC823 | chr9  | 130149601 | 133073061 | 0.789197   | Copy gain    |
| BGC823 | chr9  | 133223060 | 137041194 | 0.789197   | Copy gain    |
| BGC823 | chr9  | 137091193 | 137397400 | 0.789197   | Copy gain    |
| BGC823 | chr9  | 137397401 | 138214300 | 0.879597   | Copy gain    |
| BGC823 | chr9  | 138214301 | 138217100 | -8.3671    | Copy loss    |
| BGC823 | chr9  | 138217101 | 139166998 | 0.663697   | Copy gain    |
| BGC823 | chr9  | 139216997 | 140253400 | 0.663697   | Copy gain    |
| BGC823 | chr9  | 140253401 | 140255500 | -8.1169    | Copy loss    |
| BGC823 | chr9  | 140255501 | 141153432 | 0.811297   | Copy gain    |
| BGC823 | chr9  | 141213431 | 141213431 | 0.811297   | Copy gain    |
| BGC823 | chr10 | 60000     | 4290300   | -0.0719026 | Copy neutral |
| BGC823 | chr10 | 4290301   | 4291700   | -7.9917    | Copy loss    |
| BGC823 | chr10 | 4291701   | 4370800   | -0.0225026 | Copy neutral |
| BGC823 | chr10 | 4370801   | 5550300   | 0.0686974  | Copy neutral |

|        |       |          |          |            |              |
|--------|-------|----------|----------|------------|--------------|
| BGC823 | chr10 | 5550301  | 5830300  | -0.0686026 | Copy neutral |
| BGC823 | chr10 | 5830301  | 5889800  | -0.295303  | Copy neutral |
| BGC823 | chr10 | 5889801  | 5894000  | -1.2657    | Copy loss    |
| BGC823 | chr10 | 5894001  | 6355300  | -0.173303  | Copy neutral |
| BGC823 | chr10 | 6355301  | 6839700  | -0.0105026 | Copy neutral |
| BGC823 | chr10 | 6839701  | 6842500  | -1.2076    | Copy loss    |
| BGC823 | chr10 | 6842501  | 7380800  | 0.00519737 | Copy neutral |
| BGC823 | chr10 | 7380801  | 8049300  | -0.119203  | Copy neutral |
| BGC823 | chr10 | 8049301  | 8163400  | -0.400303  | Copy neutral |
| BGC823 | chr10 | 8163401  | 8310400  | -0.133603  | Copy neutral |
| BGC823 | chr10 | 8310401  | 8311800  | -8.3671    | Copy loss    |
| BGC823 | chr10 | 8311801  | 8373400  | -0.100403  | Copy neutral |
| BGC823 | chr10 | 8373401  | 8559600  | -0.227603  | Copy neutral |
| BGC823 | chr10 | 8559601  | 10798900 | -0.0602026 | Copy neutral |
| BGC823 | chr10 | 10798901 | 10825500 | -1.3049    | Copy loss    |
| BGC823 | chr10 | 10825501 | 17974676 | -0.125303  | Copy neutral |
| BGC823 | chr10 | 18024675 | 18171650 | -0.125303  | Copy neutral |
| BGC823 | chr10 | 18171651 | 18215750 | -4.5738    | Copy loss    |
| BGC823 | chr10 | 18215751 | 31443300 | -0.0796026 | Copy neutral |
| BGC823 | chr10 | 31443301 | 31444700 | -8.3671    | Copy loss    |
| BGC823 | chr10 | 31444701 | 32204900 | 0.0459974  | Copy neutral |
| BGC823 | chr10 | 32204901 | 32692100 | -0.124003  | Copy neutral |
| BGC823 | chr10 | 32692101 | 32766300 | 0.0106974  | Copy neutral |
| BGC823 | chr10 | 32766301 | 32787300 | 0.355297   | Copy neutral |
| BGC823 | chr10 | 32787301 | 32805500 | -0.0902026 | Copy neutral |
| BGC823 | chr10 | 32805501 | 33231100 | 0.200597   | Copy neutral |
| BGC823 | chr10 | 33231101 | 34885900 | -0.0326026 | Copy neutral |
| BGC823 | chr10 | 34885901 | 38411100 | -0.152303  | Copy neutral |
| BGC823 | chr10 | 38411101 | 38414600 | 1.1509     | Copy gain    |
| BGC823 | chr10 | 38414601 | 38570000 | 1.5657     | Copy gain    |
| BGC823 | chr10 | 38570001 | 38688650 | 1.3683     | Copy gain    |
| BGC823 | chr10 | 38688651 | 38772300 | 0.477397   | Copy gain    |
| BGC823 | chr10 | 38772301 | 38815700 | 1.1734     | Copy gain    |
| BGC823 | chr10 | 38815701 | 38818836 | 4.801      | Copy gain    |
| BGC823 | chr10 | 38868835 | 39076800 | 0.900397   | Copy gain    |
| BGC823 | chr10 | 39076801 | 39154936 | 1.4061     | Copy gain    |
| BGC823 | chr10 | 42354935 | 42382900 | 4.7184     | Copy gain    |
| BGC823 | chr10 | 42382901 | 42397600 | 9.7495     | Copy gain    |
| BGC823 | chr10 | 42397601 | 42401100 | 6.796      | Copy gain    |
| BGC823 | chr10 | 42401101 | 42407400 | 0.777397   | Copy gain    |
| BGC823 | chr10 | 42407401 | 42409500 | 6.235      | Copy gain    |
| BGC823 | chr10 | 42409501 | 42422800 | 0.481497   | Copy gain    |
| BGC823 | chr10 | 42422801 | 42434000 | 0.259297   | Copy neutral |
| BGC823 | chr10 | 42434001 | 42441000 | 0.737697   | Copy gain    |
| BGC823 | chr10 | 42441001 | 42485100 | 0.362897   | Copy neutral |
| BGC823 | chr10 | 42485101 | 42488600 | 0.915697   | Copy gain    |
| BGC823 | chr10 | 42488601 | 42502600 | 0.330597   | Copy neutral |
| BGC823 | chr10 | 42502601 | 42522200 | 0.0778974  | Copy neutral |
| BGC823 | chr10 | 42522201 | 42526750 | 0.611297   | Copy gain    |
| BGC823 | chr10 | 42526751 | 42546688 | 6.5855     | Copy gain    |
| BGC823 | chr10 | 42596687 | 42600600 | 6.5855     | Copy gain    |
| BGC823 | chr10 | 42600601 | 42606200 | 1.7478     | Copy gain    |

|        |       |          |          |            |              |
|--------|-------|----------|----------|------------|--------------|
| BGC823 | chr10 | 42606201 | 42609000 | -1.0567    | Copy loss    |
| BGC823 | chr10 | 42609001 | 42644700 | 1.594      | Copy gain    |
| BGC823 | chr10 | 42644701 | 42646800 | -0.241003  | Copy neutral |
| BGC823 | chr10 | 42646801 | 42662900 | 2.3017     | Copy gain    |
| BGC823 | chr10 | 42662901 | 42735000 | 1.0253     | Copy gain    |
| BGC823 | chr10 | 42735001 | 42739550 | -0.0593026 | Copy neutral |
| BGC823 | chr10 | 42739551 | 42818300 | 1.1687     | Copy gain    |
| BGC823 | chr10 | 42818301 | 44730000 | 0.506897   | Copy gain    |
| BGC823 | chr10 | 44730001 | 44877700 | 0.954897   | Copy gain    |
| BGC823 | chr10 | 44877701 | 44884000 | 0.172197   | Copy neutral |
| BGC823 | chr10 | 44884001 | 45756200 | 0.938997   | Copy gain    |
| BGC823 | chr10 | 45756201 | 45841600 | 1.0963     | Copy gain    |
| BGC823 | chr10 | 45841601 | 45843700 | 0.284297   | Copy neutral |
| BGC823 | chr10 | 45843701 | 45866100 | 1.197      | Copy gain    |
| BGC823 | chr10 | 45866101 | 46426965 | 0.935697   | Copy gain    |
| BGC823 | chr10 | 46476964 | 46945150 | 0.935697   | Copy gain    |
| BGC823 | chr10 | 46945151 | 47150250 | 2.1935     | Copy gain    |
| BGC823 | chr10 | 47150251 | 47429170 | 1.0558     | Copy gain    |
| BGC823 | chr10 | 47529169 | 47792477 | 1.0558     | Copy gain    |
| BGC823 | chr10 | 47892476 | 47976600 | 1.0558     | Copy gain    |
| BGC823 | chr10 | 47976601 | 48055708 | -0.454803  | Copy loss    |
| BGC823 | chr10 | 48105707 | 49095537 | 1.0315     | Copy gain    |
| BGC823 | chr10 | 49195536 | 51137411 | 1.0315     | Copy gain    |
| BGC823 | chr10 | 51187410 | 51398846 | 1.0315     | Copy gain    |
| BGC823 | chr10 | 51448845 | 51898350 | 1.0315     | Copy gain    |
| BGC823 | chr10 | 51898351 | 51911300 | -7.7665    | Copy loss    |
| BGC823 | chr10 | 51911301 | 51935100 | -0.742903  | Copy loss    |
| BGC823 | chr10 | 51935101 | 52716300 | 1.0175     | Copy gain    |
| BGC823 | chr10 | 52716301 | 53619300 | 0.896997   | Copy gain    |
| BGC823 | chr10 | 53619301 | 53634000 | 1.0649     | Copy gain    |
| BGC823 | chr10 | 53634001 | 53755800 | 1.2811     | Copy gain    |
| BGC823 | chr10 | 53755801 | 54637100 | 1.0236     | Copy gain    |
| BGC823 | chr10 | 54637101 | 55034000 | 0.928697   | Copy gain    |
| BGC823 | chr10 | 55034001 | 55038200 | 1.2053     | Copy gain    |
| BGC823 | chr10 | 55038201 | 55082300 | 0.849597   | Copy gain    |
| BGC823 | chr10 | 55082301 | 55090000 | -0.933503  | Copy loss    |
| BGC823 | chr10 | 55090001 | 59210200 | 0.860997   | Copy gain    |
| BGC823 | chr10 | 59210201 | 59211600 | -8.3671    | Copy loss    |
| BGC823 | chr10 | 59211601 | 59476200 | 0.910597   | Copy gain    |
| BGC823 | chr10 | 59476201 | 61434100 | 1.0351     | Copy gain    |
| BGC823 | chr10 | 61434101 | 62626900 | 0.946397   | Copy gain    |
| BGC823 | chr10 | 62626901 | 62703200 | 1.0203     | Copy gain    |
| BGC823 | chr10 | 62703201 | 62706000 | 0.174997   | Copy neutral |
| BGC823 | chr10 | 62706001 | 63659400 | 1.0535     | Copy gain    |
| BGC823 | chr10 | 63659401 | 63664300 | 0.322697   | Copy neutral |
| BGC823 | chr10 | 63664301 | 64236900 | 1.036      | Copy gain    |
| BGC823 | chr10 | 64236901 | 64563800 | 1.3403     | Copy gain    |
| BGC823 | chr10 | 64563801 | 64565900 | 0.211097   | Copy neutral |
| BGC823 | chr10 | 64565901 | 64574300 | 1.2007     | Copy gain    |
| BGC823 | chr10 | 64574301 | 64579200 | 0.364197   | Copy neutral |
| BGC823 | chr10 | 64579201 | 64775200 | 1.2788     | Copy gain    |
| BGC823 | chr10 | 64775201 | 64901900 | 1.0936     | Copy gain    |

|        |       |          |          |            |              |
|--------|-------|----------|----------|------------|--------------|
| BGC823 | chr10 | 64901901 | 65452100 | 0.842497   | Copy gain    |
| BGC823 | chr10 | 65452101 | 65570400 | 1.0168     | Copy gain    |
| BGC823 | chr10 | 65570401 | 65572500 | -0.529103  | Copy loss    |
| BGC823 | chr10 | 65572501 | 66003700 | 0.995597   | Copy gain    |
| BGC823 | chr10 | 66003701 | 68971000 | 0.868897   | Copy gain    |
| BGC823 | chr10 | 68971001 | 69311900 | 0.998597   | Copy gain    |
| BGC823 | chr10 | 69311901 | 69364400 | 1.1928     | Copy gain    |
| BGC823 | chr10 | 69364401 | 69484800 | 1.0519     | Copy gain    |
| BGC823 | chr10 | 69484801 | 69488300 | 0.113597   | Copy neutral |
| BGC823 | chr10 | 69488301 | 69553400 | 1.0476     | Copy gain    |
| BGC823 | chr10 | 69553401 | 69671700 | 0.701197   | Copy gain    |
| BGC823 | chr10 | 69671701 | 70106400 | 0.971997   | Copy gain    |
| BGC823 | chr10 | 70106401 | 70261100 | 0.659897   | Copy gain    |
| BGC823 | chr10 | 70261101 | 70293300 | 0.365497   | Copy neutral |
| BGC823 | chr10 | 70293301 | 70462000 | 0.754597   | Copy gain    |
| BGC823 | chr10 | 70462001 | 70490700 | 0.315397   | Copy neutral |
| BGC823 | chr10 | 70490701 | 70606200 | 0.702297   | Copy gain    |
| BGC823 | chr10 | 70606201 | 71086400 | 0.855397   | Copy gain    |
| BGC823 | chr10 | 71086401 | 71330700 | 0.966597   | Copy gain    |
| BGC823 | chr10 | 71330701 | 71339100 | 0.409297   | Copy neutral |
| BGC823 | chr10 | 71339101 | 72119600 | 0.997397   | Copy gain    |
| BGC823 | chr10 | 72119601 | 72399600 | 0.851297   | Copy gain    |
| BGC823 | chr10 | 72399601 | 72898700 | 0.994297   | Copy gain    |
| BGC823 | chr10 | 72898701 | 72937200 | 1.2952     | Copy gain    |
| BGC823 | chr10 | 72937201 | 73609200 | 0.973897   | Copy gain    |
| BGC823 | chr10 | 73609201 | 73664500 | 0.699197   | Copy gain    |
| BGC823 | chr10 | 73664501 | 73942400 | 0.969897   | Copy gain    |
| BGC823 | chr10 | 73942401 | 74108300 | 0.718697   | Copy gain    |
| BGC823 | chr10 | 74108301 | 74359600 | 1.0053     | Copy gain    |
| BGC823 | chr10 | 74359601 | 74474400 | 0.798697   | Copy gain    |
| BGC823 | chr10 | 74474401 | 74850300 | 0.986697   | Copy gain    |
| BGC823 | chr10 | 74850301 | 74920300 | 0.720197   | Copy gain    |
| BGC823 | chr10 | 74920301 | 75365500 | 0.932597   | Copy gain    |
| BGC823 | chr10 | 75365501 | 75386500 | 0.513297   | Copy gain    |
| BGC823 | chr10 | 75386501 | 75925500 | 0.924497   | Copy gain    |
| BGC823 | chr10 | 75925501 | 75946500 | 0.556897   | Copy gain    |
| BGC823 | chr10 | 75946501 | 76547800 | 0.955397   | Copy gain    |
| BGC823 | chr10 | 76547801 | 76593300 | 0.627197   | Copy gain    |
| BGC823 | chr10 | 76593301 | 76807500 | 0.966597   | Copy gain    |
| BGC823 | chr10 | 76807501 | 77038500 | 0.853897   | Copy gain    |
| BGC823 | chr10 | 77038501 | 77155400 | 1.0295     | Copy gain    |
| BGC823 | chr10 | 77155401 | 77169400 | 0.109397   | Copy neutral |
| BGC823 | chr10 | 77169401 | 77193900 | 0.944997   | Copy gain    |
| BGC823 | chr10 | 77193901 | 77402500 | 1.067      | Copy gain    |
| BGC823 | chr10 | 77402501 | 77405300 | -0.421203  | Copy neutral |
| BGC823 | chr10 | 77405301 | 77714700 | 1.0832     | Copy gain    |
| BGC823 | chr10 | 77714701 | 88881800 | -0.0224026 | Copy neutral |
| BGC823 | chr10 | 88881801 | 91716800 | 0.0957974  | Copy neutral |
| BGC823 | chr10 | 91716801 | 92924300 | 0.00169737 | Copy neutral |
| BGC823 | chr10 | 92924301 | 93594900 | 0.116097   | Copy neutral |
| BGC823 | chr10 | 93594901 | 93945600 | -0.0792026 | Copy neutral |
| BGC823 | chr10 | 93945601 | 94531500 | -0.212203  | Copy neutral |

|        |       |           |           |            |              |
|--------|-------|-----------|-----------|------------|--------------|
| BGC823 | chr10 | 94531501  | 96248600  | -0.0299026 | Copy neutral |
| BGC823 | chr10 | 96248601  | 96345900  | 0.371797   | Copy neutral |
| BGC823 | chr10 | 96345901  | 96392800  | -0.115403  | Copy neutral |
| BGC823 | chr10 | 96392801  | 96936000  | 0.159097   | Copy neutral |
| BGC823 | chr10 | 96936001  | 98461300  | -0.0856026 | Copy neutral |
| BGC823 | chr10 | 98461301  | 98609700  | -0.319303  | Copy neutral |
| BGC823 | chr10 | 98609701  | 98990500  | -0.0604026 | Copy neutral |
| BGC823 | chr10 | 98990501  | 99202600  | -0.254403  | Copy neutral |
| BGC823 | chr10 | 99202601  | 99495200  | -0.103003  | Copy neutral |
| BGC823 | chr10 | 99495201  | 99906100  | 0.0128974  | Copy neutral |
| BGC823 | chr10 | 99906101  | 100019500 | 0.170997   | Copy neutral |
| BGC823 | chr10 | 100019501 | 100687650 | -0.0263026 | Copy neutral |
| BGC823 | chr10 | 100687651 | 100701300 | -8.0113    | Copy loss    |
| BGC823 | chr10 | 100701301 | 107894500 | -0.0881026 | Copy neutral |
| BGC823 | chr10 | 107894501 | 108462900 | 0.639097   | Copy gain    |
| BGC823 | chr10 | 108462901 | 109751600 | 0.503097   | Copy gain    |
| BGC823 | chr10 | 109751601 | 109930800 | -0.0856026 | Copy neutral |
| BGC823 | chr10 | 109930801 | 114587900 | 0.560197   | Copy gain    |
| BGC823 | chr10 | 114587901 | 125869473 | -0.0781026 | Copy neutral |
| BGC823 | chr10 | 125919472 | 127574300 | -0.0781026 | Copy neutral |
| BGC823 | chr10 | 127574301 | 127584100 | 3.1935     | Copy gain    |
| BGC823 | chr10 | 127584101 | 127608600 | 1.4715     | Copy gain    |
| BGC823 | chr10 | 127608601 | 127617000 | 0.830697   | Copy gain    |
| BGC823 | chr10 | 127617001 | 128531200 | -0.0785026 | Copy neutral |
| BGC823 | chr10 | 128531201 | 128616070 | -0.147003  | Copy neutral |
| BGC823 | chr10 | 128766069 | 131629400 | -0.147003  | Copy neutral |
| BGC823 | chr10 | 131629401 | 131772200 | -0.352303  | Copy neutral |
| BGC823 | chr10 | 131772201 | 132024200 | -0.208203  | Copy neutral |
| BGC823 | chr10 | 132024201 | 133381405 | -0.0496026 | Copy neutral |
| BGC823 | chr10 | 133431404 | 133455700 | -0.0496026 | Copy neutral |
| BGC823 | chr10 | 133455701 | 133457100 | -8.3671    | Copy loss    |
| BGC823 | chr10 | 133457101 | 133677528 | -0.0449026 | Copy neutral |
| BGC823 | chr10 | 133727527 | 133765800 | -0.0449026 | Copy neutral |
| BGC823 | chr10 | 133765801 | 133767200 | -2.3361    | Copy loss    |
| BGC823 | chr10 | 133767201 | 133976500 | -0.163303  | Copy neutral |
| BGC823 | chr10 | 133976501 | 134527400 | -0.0120026 | Copy neutral |
| BGC823 | chr10 | 134527401 | 134568000 | -0.191003  | Copy neutral |
| BGC823 | chr10 | 134568001 | 134582000 | 0.105997   | Copy neutral |
| BGC823 | chr10 | 134582001 | 134632400 | -0.269403  | Copy neutral |
| BGC823 | chr10 | 134632401 | 134638700 | 0.858897   | Copy gain    |
| BGC823 | chr10 | 134638701 | 134824200 | -0.0770026 | Copy neutral |
| BGC823 | chr10 | 134824201 | 134825600 | 1.2676     | Copy gain    |
| BGC823 | chr10 | 134825601 | 134878800 | -0.126003  | Copy neutral |
| BGC823 | chr10 | 134878801 | 134880200 | -1.7162    | Copy loss    |
| BGC823 | chr10 | 134880201 | 134890700 | -0.232203  | Copy neutral |
| BGC823 | chr10 | 134890701 | 134893500 | -1.1614    | Copy loss    |
| BGC823 | chr10 | 134893501 | 134924300 | -0.0773026 | Copy neutral |
| BGC823 | chr10 | 134924301 | 134925700 | 1.6966     | Copy gain    |
| BGC823 | chr10 | 134925701 | 134927100 | -0.826803  | Copy loss    |
| BGC823 | chr10 | 134927101 | 135034900 | -0.0556026 | Copy neutral |
| BGC823 | chr10 | 135034901 | 135043300 | -0.537203  | Copy loss    |
| BGC823 | chr10 | 135043301 | 135044700 | -8.3671    | Copy loss    |

|        |       |           |           |            |              |
|--------|-------|-----------|-----------|------------|--------------|
| BGC823 | chr10 | 135044701 | 135130100 | -0.140103  | Copy neutral |
| BGC823 | chr10 | 135130101 | 135132200 | -1.5506    | Copy loss    |
| BGC823 | chr10 | 135132201 | 135218300 | -0.222203  | Copy neutral |
| BGC823 | chr10 | 135218301 | 135442300 | 0.0465974  | Copy neutral |
| BGC823 | chr10 | 135442301 | 135499700 | 1.6107     | Copy gain    |
| BGC823 | chr10 | 135499701 | 135501800 | 5.7848     | Copy gain    |
| BGC823 | chr10 | 135501801 | 135524748 | 0.659597   | Copy gain    |
| BGC823 | chr10 | 135534747 | 135534747 | 0.659597   | Copy gain    |
| BGC823 | chr11 | 60000     | 180600    | 0.130797   | Copy neutral |
| BGC823 | chr11 | 180601    | 196000    | 1.2351     | Copy gain    |
| BGC823 | chr11 | 196001    | 400400    | -0.0971026 | Copy neutral |
| BGC823 | chr11 | 400401    | 402150    | -8.3671    | Copy loss    |
| BGC823 | chr11 | 402151    | 1162760   | -0.125003  | Copy neutral |
| BGC823 | chr11 | 1212759   | 1654800   | -0.125003  | Copy neutral |
| BGC823 | chr11 | 1654801   | 1656200   | -8.3671    | Copy loss    |
| BGC823 | chr11 | 1656201   | 1806700   | -0.101103  | Copy neutral |
| BGC823 | chr11 | 1806701   | 1842400   | -1.4033    | Copy loss    |
| BGC823 | chr11 | 1842401   | 1918000   | -0.537803  | Copy loss    |
| BGC823 | chr11 | 1918001   | 1934800   | -1.526     | Copy loss    |
| BGC823 | chr11 | 1934801   | 2160200   | -0.676603  | Copy loss    |
| BGC823 | chr11 | 2160201   | 2173500   | -1.4404    | Copy loss    |
| BGC823 | chr11 | 2173501   | 2312100   | -0.0178026 | Copy neutral |
| BGC823 | chr11 | 2312101   | 2314900   | -1.1163    | Copy loss    |
| BGC823 | chr11 | 2314901   | 2882600   | 0.0390974  | Copy neutral |
| BGC823 | chr11 | 2882601   | 2899400   | -0.279303  | Copy neutral |
| BGC823 | chr11 | 2899401   | 2958900   | 1.0562     | Copy gain    |
| BGC823 | chr11 | 2958901   | 3067400   | 1.4092     | Copy gain    |
| BGC823 | chr11 | 3067401   | 3194100   | 1.1562     | Copy gain    |
| BGC823 | chr11 | 3194101   | 3203200   | 1.7568     | Copy gain    |
| BGC823 | chr11 | 3203201   | 3237500   | 1.2666     | Copy gain    |
| BGC823 | chr11 | 3237501   | 3243800   | 0.0816974  | Copy neutral |
| BGC823 | chr11 | 3243801   | 3297000   | 1.2538     | Copy gain    |
| BGC823 | chr11 | 3297001   | 3342150   | -0.447603  | Copy neutral |
| BGC823 | chr11 | 3342151   | 3740100   | 1.2156     | Copy gain    |
| BGC823 | chr11 | 3740101   | 3830400   | 0.939897   | Copy gain    |
| BGC823 | chr11 | 3830401   | 4239550   | 1.2326     | Copy gain    |
| BGC823 | chr11 | 4239551   | 4252500   | 1.6988     | Copy gain    |
| BGC823 | chr11 | 4252501   | 4266500   | 2.5698     | Copy gain    |
| BGC823 | chr11 | 4266501   | 4315150   | 1.5804     | Copy gain    |
| BGC823 | chr11 | 4315151   | 4348050   | 2.9098     | Copy gain    |
| BGC823 | chr11 | 4348051   | 4376050   | 1.8634     | Copy gain    |
| BGC823 | chr11 | 4376051   | 4390400   | 1.4452     | Copy gain    |
| BGC823 | chr11 | 4390401   | 10960600  | 0.943797   | Copy gain    |
| BGC823 | chr11 | 10960601  | 11002600  | 1.2106     | Copy gain    |
| BGC823 | chr11 | 11002601  | 11641700  | 1.5912     | Copy gain    |
| BGC823 | chr11 | 11641701  | 11644500  | 0.483697   | Copy gain    |
| BGC823 | chr11 | 11644501  | 11998000  | 1.5933     | Copy gain    |
| BGC823 | chr11 | 11998001  | 13200600  | 1.0567     | Copy gain    |
| BGC823 | chr11 | 13200601  | 20426700  | 0.577997   | Copy gain    |
| BGC823 | chr11 | 20426701  | 22026900  | 0.936697   | Copy gain    |
| BGC823 | chr11 | 22026901  | 22416100  | 0.489997   | Copy gain    |
| BGC823 | chr11 | 22416101  | 23263100  | -0.0380026 | Copy neutral |



|        |       |          |          |            |              |
|--------|-------|----------|----------|------------|--------------|
| BGC823 | chr11 | 23263101 | 24152800 | 0.549997   | Copy gain    |
| BGC823 | chr11 | 24152801 | 24546900 | 0.0474974  | Copy neutral |
| BGC823 | chr11 | 24546901 | 25260900 | 0.528797   | Copy gain    |
| BGC823 | chr11 | 25260901 | 25446400 | 0.933797   | Copy gain    |
| BGC823 | chr11 | 25446401 | 25450600 | -1.9034    | Copy loss    |
| BGC823 | chr11 | 25450601 | 25621400 | 0.947597   | Copy gain    |
| BGC823 | chr11 | 25621401 | 27558300 | 1.5088     | Copy gain    |
| BGC823 | chr11 | 27558301 | 27720700 | 1.1149     | Copy gain    |
| BGC823 | chr11 | 27720701 | 27724200 | 0.465697   | Copy gain    |
| BGC823 | chr11 | 27724201 | 27739600 | 1.0873     | Copy gain    |
| BGC823 | chr11 | 27739601 | 27744500 | 0.324097   | Copy neutral |
| BGC823 | chr11 | 27744501 | 28539700 | 1.0944     | Copy gain    |
| BGC823 | chr11 | 28539701 | 28613900 | 0.119497   | Copy neutral |
| BGC823 | chr11 | 28613901 | 28894600 | 1.0507     | Copy gain    |
| BGC823 | chr11 | 28894601 | 28924700 | 1.3087     | Copy gain    |
| BGC823 | chr11 | 28924701 | 28961800 | 1.0304     | Copy gain    |
| BGC823 | chr11 | 28961801 | 29617700 | 1.4806     | Copy gain    |
| BGC823 | chr11 | 29617701 | 30037000 | 0.936797   | Copy gain    |
| BGC823 | chr11 | 30037001 | 30040500 | 0.0179974  | Copy neutral |
| BGC823 | chr11 | 30040501 | 30162300 | 0.931997   | Copy gain    |
| BGC823 | chr11 | 30162301 | 30299500 | -0.0619026 | Copy neutral |
| BGC823 | chr11 | 30299501 | 30340100 | 0.935497   | Copy gain    |
| BGC823 | chr11 | 30340101 | 30363200 | 0.447097   | Copy neutral |
| BGC823 | chr11 | 30363201 | 31817100 | 0.909097   | Copy gain    |
| BGC823 | chr11 | 31817101 | 31849300 | 0.285397   | Copy neutral |
| BGC823 | chr11 | 31849301 | 32389000 | 0.943397   | Copy gain    |
| BGC823 | chr11 | 32389001 | 32390400 | -5.0595    | Copy loss    |
| BGC823 | chr11 | 32390401 | 36340500 | 1.0075     | Copy gain    |
| BGC823 | chr11 | 36340501 | 36411200 | 0.510797   | Copy gain    |
| BGC823 | chr11 | 36411201 | 36437800 | 1.0176     | Copy gain    |
| BGC823 | chr11 | 36437801 | 38686900 | 0.548997   | Copy gain    |
| BGC823 | chr11 | 38686901 | 39935000 | 0.452897   | Copy gain    |
| BGC823 | chr11 | 39935001 | 39956700 | 0.0850974  | Copy neutral |
| BGC823 | chr11 | 39956701 | 42672700 | 0.488497   | Copy gain    |
| BGC823 | chr11 | 42672701 | 43327900 | 0.551097   | Copy gain    |
| BGC823 | chr11 | 43327901 | 43335600 | -0.0842026 | Copy neutral |
| BGC823 | chr11 | 43335601 | 43352400 | 0.540797   | Copy gain    |
| BGC823 | chr11 | 43352401 | 43419600 | -0.126403  | Copy neutral |
| BGC823 | chr11 | 43419601 | 43573600 | 0.553597   | Copy gain    |
| BGC823 | chr11 | 43573601 | 43712200 | 0.416897   | Copy neutral |
| BGC823 | chr11 | 43712201 | 44912700 | 0.572397   | Copy gain    |
| BGC823 | chr11 | 44912701 | 44964500 | 0.864997   | Copy gain    |
| BGC823 | chr11 | 44964501 | 44972900 | 0.343297   | Copy neutral |
| BGC823 | chr11 | 44972901 | 45009300 | 0.828197   | Copy gain    |
| BGC823 | chr11 | 45009301 | 45916500 | 1.0148     | Copy gain    |
| BGC823 | chr11 | 45916501 | 45962000 | 0.741797   | Copy gain    |
| BGC823 | chr11 | 45962001 | 46141200 | 1.0097     | Copy gain    |
| BGC823 | chr11 | 46141201 | 46144700 | -0.345203  | Copy neutral |
| BGC823 | chr11 | 46144701 | 46316200 | 1.0087     | Copy gain    |
| BGC823 | chr11 | 46316201 | 46417000 | 0.794497   | Copy gain    |
| BGC823 | chr11 | 46417001 | 46572400 | 0.989497   | Copy gain    |
| BGC823 | chr11 | 46572401 | 46760000 | 0.754697   | Copy gain    |

|        |       |          |          |           |              |
|--------|-------|----------|----------|-----------|--------------|
| BGC823 | chr11 | 46760001 | 46946900 | 0.924797  | Copy gain    |
| BGC823 | chr11 | 46946901 | 47159000 | 1.6245    | Copy gain    |
| BGC823 | chr11 | 47159001 | 47792500 | 1.3619    | Copy gain    |
| BGC823 | chr11 | 47792501 | 47964700 | 1.6762    | Copy gain    |
| BGC823 | chr11 | 47964701 | 48136200 | 1.475     | Copy gain    |
| BGC823 | chr11 | 48136201 | 48340600 | 1.6894    | Copy gain    |
| BGC823 | chr11 | 48340601 | 48388200 | 1.9647    | Copy gain    |
| BGC823 | chr11 | 48388201 | 48601000 | 1.6566    | Copy gain    |
| BGC823 | chr11 | 48601001 | 48603800 | -7.6627   | Copy loss    |
| BGC823 | chr11 | 48603801 | 49840700 | 1.4517    | Copy gain    |
| BGC823 | chr11 | 49840701 | 50173200 | 0.506697  | Copy gain    |
| BGC823 | chr11 | 50173201 | 50270500 | 0.235197  | Copy neutral |
| BGC823 | chr11 | 50270501 | 50302000 | 0.624197  | Copy gain    |
| BGC823 | chr11 | 50302001 | 50334900 | 0.208397  | Copy neutral |
| BGC823 | chr11 | 50334901 | 50381800 | 0.534097  | Copy gain    |
| BGC823 | chr11 | 50381801 | 50430800 | 0.354797  | Copy neutral |
| BGC823 | chr11 | 50430801 | 50439900 | 0.686197  | Copy gain    |
| BGC823 | chr11 | 50439901 | 50519700 | 0.367597  | Copy neutral |
| BGC823 | chr11 | 50519701 | 50521800 | 0.963297  | Copy gain    |
| BGC823 | chr11 | 50521801 | 50643600 | 0.247297  | Copy neutral |
| BGC823 | chr11 | 50643601 | 50783854 | 0.622397  | Copy gain    |
| BGC823 | chr11 | 51090853 | 51268000 | 0.360897  | Copy neutral |
| BGC823 | chr11 | 51268001 | 51286200 | 0.761697  | Copy gain    |
| BGC823 | chr11 | 51286201 | 51374400 | 0.389197  | Copy neutral |
| BGC823 | chr11 | 51374401 | 51565150 | 0.658097  | Copy gain    |
| BGC823 | chr11 | 51565151 | 51569700 | 1.2132    | Copy gain    |
| BGC823 | chr11 | 51569701 | 51578800 | 1.904     | Copy gain    |
| BGC823 | chr11 | 51578801 | 51594206 | 5.2776    | Copy gain    |
| BGC823 | chr11 | 54694205 | 54784450 | -1.5845   | Copy loss    |
| BGC823 | chr11 | 54784451 | 54900300 | 0.295397  | Copy neutral |
| BGC823 | chr11 | 54900301 | 54906600 | 0.699497  | Copy gain    |
| BGC823 | chr11 | 54906601 | 54935300 | 0.262497  | Copy neutral |
| BGC823 | chr11 | 54935301 | 54938800 | 0.691097  | Copy gain    |
| BGC823 | chr11 | 54938801 | 54945800 | 0.281897  | Copy neutral |
| BGC823 | chr11 | 54945801 | 54951400 | 0.0394974 | Copy neutral |
| BGC823 | chr11 | 54951401 | 54982900 | -0.295803 | Copy neutral |
| BGC823 | chr11 | 54982901 | 55001800 | 0.390897  | Copy neutral |
| BGC823 | chr11 | 55001801 | 55012300 | -0.778203 | Copy loss    |
| BGC823 | chr11 | 55012301 | 55365800 | 0.560597  | Copy gain    |
| BGC823 | chr11 | 55365801 | 55431600 | -0.890903 | Copy loss    |
| BGC823 | chr11 | 55431601 | 55434400 | 0.547097  | Copy gain    |
| BGC823 | chr11 | 55434401 | 55456100 | -0.684303 | Copy loss    |
| BGC823 | chr11 | 55456101 | 56373800 | 0.545697  | Copy gain    |
| BGC823 | chr11 | 56373801 | 57224300 | 0.681197  | Copy gain    |
| BGC823 | chr11 | 57224301 | 57565900 | 0.411197  | Copy neutral |
| BGC823 | chr11 | 57565901 | 58332400 | 0.619197  | Copy gain    |
| BGC823 | chr11 | 58332401 | 58349200 | 0.217797  | Copy neutral |
| BGC823 | chr11 | 58349201 | 59069500 | 0.601197  | Copy gain    |
| BGC823 | chr11 | 59069501 | 59164000 | 0.785397  | Copy gain    |
| BGC823 | chr11 | 59164001 | 59297000 | 0.629497  | Copy gain    |
| BGC823 | chr11 | 59297001 | 59342500 | 0.208697  | Copy neutral |
| BGC823 | chr11 | 59342501 | 59435600 | 0.511797  | Copy gain    |

|        |       |          |          |            |              |
|--------|-------|----------|----------|------------|--------------|
| BGC823 | chr11 | 59435601 | 59441900 | -0.0547026 | Copy neutral |
| BGC823 | chr11 | 59441901 | 59639300 | 0.571497   | Copy gain    |
| BGC823 | chr11 | 59639301 | 60700500 | 0.981197   | Copy gain    |
| BGC823 | chr11 | 60700501 | 60866400 | 0.842597   | Copy gain    |
| BGC823 | chr11 | 60866401 | 60869200 | 2.1054     | Copy gain    |
| BGC823 | chr11 | 60869201 | 60964400 | 0.843497   | Copy gain    |
| BGC823 | chr11 | 60964401 | 61018300 | 1.2252     | Copy gain    |
| BGC823 | chr11 | 61018301 | 61038600 | 0.833797   | Copy gain    |
| BGC823 | chr11 | 61038601 | 61060300 | 1.515      | Copy gain    |
| BGC823 | chr11 | 61060301 | 61064500 | 0.308197   | Copy neutral |
| BGC823 | chr11 | 61064501 | 61145700 | 0.916797   | Copy gain    |
| BGC823 | chr11 | 61145701 | 61155500 | 0.387597   | Copy neutral |
| BGC823 | chr11 | 61155501 | 61288500 | 0.863797   | Copy gain    |
| BGC823 | chr11 | 61288501 | 61299000 | 1.3225     | Copy gain    |
| BGC823 | chr11 | 61299001 | 61776400 | 0.873997   | Copy gain    |
| BGC823 | chr11 | 61776401 | 61779200 | 0.269297   | Copy neutral |
| BGC823 | chr11 | 61779201 | 61823300 | 1.298      | Copy gain    |
| BGC823 | chr11 | 61823301 | 61881400 | 0.825097   | Copy gain    |
| BGC823 | chr11 | 61881401 | 62077400 | 1.1124     | Copy gain    |
| BGC823 | chr11 | 62077401 | 62172600 | 0.864897   | Copy gain    |
| BGC823 | chr11 | 62172601 | 62285300 | 0.421597   | Copy neutral |
| BGC823 | chr11 | 62285301 | 62300000 | 0.948197   | Copy gain    |
| BGC823 | chr11 | 62300001 | 62340600 | 0.396797   | Copy neutral |
| BGC823 | chr11 | 62340601 | 62392400 | -0.119503  | Copy neutral |
| BGC823 | chr11 | 62392401 | 62395200 | 0.853397   | Copy gain    |
| BGC823 | chr11 | 62395201 | 62425300 | -0.215703  | Copy neutral |
| BGC823 | chr11 | 62425301 | 62472200 | -0.565503  | Copy loss    |
| BGC823 | chr11 | 62472201 | 62491800 | -0.196903  | Copy neutral |
| BGC823 | chr11 | 62491801 | 62510700 | 0.674197   | Copy gain    |
| BGC823 | chr11 | 62510701 | 62643000 | -0.283503  | Copy neutral |
| BGC823 | chr11 | 62643001 | 62753600 | 0.404797   | Copy neutral |
| BGC823 | chr11 | 62753601 | 63266000 | 0.759097   | Copy gain    |
| BGC823 | chr11 | 63266001 | 63401100 | 0.514897   | Copy gain    |
| BGC823 | chr11 | 63401101 | 64522500 | -0.152303  | Copy neutral |
| BGC823 | chr11 | 64522501 | 64993600 | 0.378097   | Copy neutral |
| BGC823 | chr11 | 64993601 | 65934400 | 0.772797   | Copy gain    |
| BGC823 | chr11 | 65934401 | 65939300 | -8.2599    | Copy loss    |
| BGC823 | chr11 | 65939301 | 66826200 | 0.805497   | Copy gain    |
| BGC823 | chr11 | 66826201 | 69089802 | 0.470297   | Copy gain    |
| BGC823 | chr11 | 69139801 | 69724696 | 0.470297   | Copy gain    |
| BGC823 | chr11 | 69774695 | 71360800 | 0.470297   | Copy gain    |
| BGC823 | chr11 | 71360801 | 71899100 | 0.629097   | Copy gain    |
| BGC823 | chr11 | 71899101 | 82792500 | 0.989097   | Copy gain    |
| BGC823 | chr11 | 82792501 | 82907300 | 0.407097   | Copy neutral |
| BGC823 | chr11 | 82907301 | 83213900 | 0.591997   | Copy gain    |
| BGC823 | chr11 | 83213901 | 83223700 | 1.1354     | Copy gain    |
| BGC823 | chr11 | 83223701 | 83228600 | 1.9027     | Copy gain    |
| BGC823 | chr11 | 83228601 | 83806100 | 0.942397   | Copy gain    |
| BGC823 | chr11 | 83806101 | 84968100 | 1.1965     | Copy gain    |
| BGC823 | chr11 | 84968101 | 85353800 | 1.3442     | Copy gain    |
| BGC823 | chr11 | 85353801 | 85482600 | 1.2452     | Copy gain    |
| BGC823 | chr11 | 85482601 | 85918000 | 0.985697   | Copy gain    |

|        |       |          |          |            |              |
|--------|-------|----------|----------|------------|--------------|
| BGC823 | chr11 | 85918001 | 85944600 | 1.4076     | Copy gain    |
| BGC823 | chr11 | 85944601 | 85948100 | 0.827097   | Copy gain    |
| BGC823 | chr11 | 85948101 | 85955800 | 1.3846     | Copy gain    |
| BGC823 | chr11 | 85955801 | 86153900 | 0.959397   | Copy gain    |
| BGC823 | chr11 | 86153901 | 86442300 | 1.1505     | Copy gain    |
| BGC823 | chr11 | 86442301 | 86445800 | 0.448797   | Copy neutral |
| BGC823 | chr11 | 86445801 | 86480800 | 1.137      | Copy gain    |
| BGC823 | chr11 | 86480801 | 86483600 | 0.448097   | Copy neutral |
| BGC823 | chr11 | 86483601 | 86583700 | 1.1483     | Copy gain    |
| BGC823 | chr11 | 86583701 | 86588600 | 0.981397   | Copy gain    |
| BGC823 | chr11 | 86588601 | 86591050 | 0.114297   | Copy neutral |
| BGC823 | chr11 | 86591051 | 86634100 | 1.0696     | Copy gain    |
| BGC823 | chr11 | 86634101 | 87048500 | 0.906197   | Copy gain    |
| BGC823 | chr11 | 87048501 | 87688379 | 1.022      | Copy gain    |
| BGC823 | chr11 | 87738378 | 88235000 | 1.022      | Copy gain    |
| BGC823 | chr11 | 88235001 | 88236400 | -0.580503  | Copy loss    |
| BGC823 | chr11 | 88236401 | 88475800 | 0.990797   | Copy gain    |
| BGC823 | chr11 | 88475801 | 89227600 | 1.1889     | Copy gain    |
| BGC823 | chr11 | 89227601 | 89255600 | 1.4903     | Copy gain    |
| BGC823 | chr11 | 89255601 | 89479950 | 1.2259     | Copy gain    |
| BGC823 | chr11 | 89479951 | 89497100 | 0.00179737 | Copy neutral |
| BGC823 | chr11 | 89497101 | 89696950 | 0.877497   | Copy gain    |
| BGC823 | chr11 | 89696951 | 89724950 | -0.595603  | Copy loss    |
| BGC823 | chr11 | 89724951 | 89829950 | 1.7132     | Copy gain    |
| BGC823 | chr11 | 89829951 | 90568100 | 1.2206     | Copy gain    |
| BGC823 | chr11 | 90568101 | 90570900 | -8.3671    | Copy loss    |
| BGC823 | chr11 | 90570901 | 91684600 | 1.2697     | Copy gain    |
| BGC823 | chr11 | 91684601 | 91957600 | 0.934797   | Copy gain    |
| BGC823 | chr11 | 91957601 | 91963900 | 0.125197   | Copy neutral |
| BGC823 | chr11 | 91963901 | 92731800 | 0.925297   | Copy gain    |
| BGC823 | chr11 | 92731801 | 92841700 | 1.5791     | Copy gain    |
| BGC823 | chr11 | 92841701 | 92852900 | 2.0712     | Copy gain    |
| BGC823 | chr11 | 92852901 | 93038400 | 1.6083     | Copy gain    |
| BGC823 | chr11 | 93038401 | 93055900 | 2.3407     | Copy gain    |
| BGC823 | chr11 | 93055901 | 93472400 | 1.7516     | Copy gain    |
| BGC823 | chr11 | 93472401 | 93543800 | 1.5109     | Copy gain    |
| BGC823 | chr11 | 93543801 | 93677500 | 1.7636     | Copy gain    |
| BGC823 | chr11 | 93677501 | 93688700 | 1.1426     | Copy gain    |
| BGC823 | chr11 | 93688701 | 93730700 | 1.7418     | Copy gain    |
| BGC823 | chr11 | 93730701 | 93744700 | 2.0199     | Copy gain    |
| BGC823 | chr11 | 93744701 | 93853900 | 1.33       | Copy gain    |
| BGC823 | chr11 | 93853901 | 93858800 | 0.242497   | Copy neutral |
| BGC823 | chr11 | 93858801 | 93968350 | 1.3626     | Copy gain    |
| BGC823 | chr11 | 93968351 | 93973250 | 3.7403     | Copy gain    |
| BGC823 | chr11 | 93973251 | 94070900 | 1.3162     | Copy gain    |
| BGC823 | chr11 | 94070901 | 94075800 | 0.667197   | Copy gain    |
| BGC823 | chr11 | 94075801 | 94081400 | 1.2909     | Copy gain    |
| BGC823 | chr11 | 94081401 | 94132500 | 1.5017     | Copy gain    |
| BGC823 | chr11 | 94132501 | 94275300 | 1.284      | Copy gain    |
| BGC823 | chr11 | 94275301 | 94279500 | 0.467397   | Copy gain    |
| BGC823 | chr11 | 94279501 | 94882900 | 1.349      | Copy gain    |
| BGC823 | chr11 | 94882901 | 94885700 | 0.618297   | Copy gain    |

|        |       |           |           |            |              |
|--------|-------|-----------|-----------|------------|--------------|
| BGC823 | chr11 | 94885701  | 94972500  | 1.1799     | Copy gain    |
| BGC823 | chr11 | 94972501  | 96287585  | 1.324      | Copy gain    |
| BGC823 | chr11 | 96437584  | 96658800  | 1.324      | Copy gain    |
| BGC823 | chr11 | 96658801  | 97287400  | 1.4688     | Copy gain    |
| BGC823 | chr11 | 97287401  | 98581700  | 1.3796     | Copy gain    |
| BGC823 | chr11 | 98581701  | 99008000  | 1.465      | Copy gain    |
| BGC823 | chr11 | 99008001  | 99752100  | 1.365      | Copy gain    |
| BGC823 | chr11 | 99752101  | 100000600 | 1.4485     | Copy gain    |
| BGC823 | chr11 | 100000601 | 100025100 | 1.5348     | Copy gain    |
| BGC823 | chr11 | 100025101 | 100060800 | 1.7536     | Copy gain    |
| BGC823 | chr11 | 100060801 | 100340800 | 1.5305     | Copy gain    |
| BGC823 | chr11 | 100340801 | 100360400 | 1.6304     | Copy gain    |
| BGC823 | chr11 | 100360401 | 100365300 | 2.0547     | Copy gain    |
| BGC823 | chr11 | 100365301 | 100415000 | 1.6736     | Copy gain    |
| BGC823 | chr11 | 100415001 | 100531200 | 1.5563     | Copy gain    |
| BGC823 | chr11 | 100531201 | 100622900 | 1.3872     | Copy gain    |
| BGC823 | chr11 | 100622901 | 100998100 | 1.5328     | Copy gain    |
| BGC823 | chr11 | 100998101 | 101000200 | 0.250097   | Copy neutral |
| BGC823 | chr11 | 101000201 | 101980900 | 1.5127     | Copy gain    |
| BGC823 | chr11 | 101980901 | 101982300 | 0.0339974  | Copy neutral |
| BGC823 | chr11 | 101982301 | 102204900 | 1.5702     | Copy gain    |
| BGC823 | chr11 | 102204901 | 102884600 | 0.651397   | Copy gain    |
| BGC823 | chr11 | 102884601 | 104734000 | 0.574097   | Copy gain    |
| BGC823 | chr11 | 104734001 | 105294000 | 0.661497   | Copy gain    |
| BGC823 | chr11 | 105294001 | 105298900 | -7.6686    | Copy loss    |
| BGC823 | chr11 | 105298901 | 107436000 | 0.581197   | Copy gain    |
| BGC823 | chr11 | 107436001 | 107644600 | 0.468297   | Copy gain    |
| BGC823 | chr11 | 107644601 | 107821700 | 0.219797   | Copy neutral |
| BGC823 | chr11 | 107821701 | 108547600 | 0.455197   | Copy gain    |
| BGC823 | chr11 | 108547601 | 109295900 | 0.549597   | Copy gain    |
| BGC823 | chr11 | 109295901 | 110068700 | 0.634797   | Copy gain    |
| BGC823 | chr11 | 110068701 | 110251400 | 0.514497   | Copy gain    |
| BGC823 | chr11 | 110251401 | 110762400 | 0.681497   | Copy gain    |
| BGC823 | chr11 | 110762401 | 111428800 | 0.591297   | Copy gain    |
| BGC823 | chr11 | 111428801 | 112018200 | 0.528797   | Copy gain    |
| BGC823 | chr11 | 112018201 | 112831600 | 0.640797   | Copy gain    |
| BGC823 | chr11 | 112831601 | 112835100 | -0.279003  | Copy neutral |
| BGC823 | chr11 | 112835101 | 113150100 | 0.626397   | Copy gain    |
| BGC823 | chr11 | 113150101 | 113172500 | 0.803297   | Copy gain    |
| BGC823 | chr11 | 113172501 | 113178800 | 0.392797   | Copy neutral |
| BGC823 | chr11 | 113178801 | 113238300 | 0.753597   | Copy gain    |
| BGC823 | chr11 | 113238301 | 113628200 | 0.584597   | Copy gain    |
| BGC823 | chr11 | 113628201 | 113633100 | 0.362097   | Copy neutral |
| BGC823 | chr11 | 113633101 | 129640700 | -0.0553026 | Copy neutral |
| BGC823 | chr11 | 129640701 | 130348400 | 0.531697   | Copy gain    |
| BGC823 | chr11 | 130348401 | 131373200 | 0.656597   | Copy gain    |
| BGC823 | chr11 | 131373201 | 134362900 | 0.494297   | Copy gain    |
| BGC823 | chr11 | 134362901 | 134365000 | -6.9135    | Copy loss    |
| BGC823 | chr11 | 134365001 | 134803900 | 0.570997   | Copy gain    |
| BGC823 | chr11 | 134803901 | 134805300 | -3.5442    | Copy loss    |
| BGC823 | chr11 | 134805301 | 134946517 | 0.526397   | Copy gain    |
| BGC823 | chr11 | 135006516 | 135006516 | 0.526397   | Copy gain    |

|        |       |          |          |             |              |
|--------|-------|----------|----------|-------------|--------------|
| BGC823 | chr12 | 60000    | 72800    | 1.5166      | Copy gain    |
| BGC823 | chr12 | 72801    | 94500    | 2.2996      | Copy gain    |
| BGC823 | chr12 | 94501    | 95740    | 0.349497    | Copy neutral |
| BGC823 | chr12 | 145739   | 155050   | 0.349497    | Copy neutral |
| BGC823 | chr12 | 155051   | 171500   | 1.6873      | Copy gain    |
| BGC823 | chr12 | 171501   | 7189877  | -0.0759026  | Copy neutral |
| BGC823 | chr12 | 7239876  | 7799400  | -0.0759026  | Copy neutral |
| BGC823 | chr12 | 7799401  | 8185100  | -0.453203   | Copy loss    |
| BGC823 | chr12 | 8185101  | 8339800  | -0.0257026  | Copy neutral |
| BGC823 | chr12 | 8339801  | 8371300  | 0.444997    | Copy neutral |
| BGC823 | chr12 | 8371301  | 8558900  | 0.0370974   | Copy neutral |
| BGC823 | chr12 | 8558901  | 8591100  | -7.1118     | Copy loss    |
| BGC823 | chr12 | 8591101  | 8618400  | -0.164303   | Copy neutral |
| BGC823 | chr12 | 8618401  | 8691900  | 0.129797    | Copy neutral |
| BGC823 | chr12 | 8691901  | 9016700  | -0.180303   | Copy neutral |
| BGC823 | chr12 | 9016701  | 9018100  | -5.3862     | Copy loss    |
| BGC823 | chr12 | 9018101  | 9152500  | -0.107803   | Copy neutral |
| BGC823 | chr12 | 9152501  | 9886800  | 0.102597    | Copy neutral |
| BGC823 | chr12 | 9886801  | 10329900 | -0.00690263 | Copy neutral |
| BGC823 | chr12 | 10329901 | 10372600 | -0.486403   | Copy loss    |
| BGC823 | chr12 | 10372601 | 11221700 | 0.0301974   | Copy neutral |
| BGC823 | chr12 | 11221701 | 11226600 | -1.3506     | Copy loss    |
| BGC823 | chr12 | 11226601 | 11250400 | -5.82       | Copy loss    |
| BGC823 | chr12 | 11250401 | 11361700 | -0.00940263 | Copy neutral |
| BGC823 | chr12 | 11361701 | 11576600 | 0.140497    | Copy neutral |
| BGC823 | chr12 | 11576601 | 12401200 | -0.0833026  | Copy neutral |
| BGC823 | chr12 | 12401201 | 12473300 | -0.341903   | Copy neutral |
| BGC823 | chr12 | 12473301 | 12833800 | -0.0607026  | Copy neutral |
| BGC823 | chr12 | 12833801 | 12876500 | 0.607497    | Copy gain    |
| BGC823 | chr12 | 12876501 | 12879300 | -0.480403   | Copy loss    |
| BGC823 | chr12 | 12879301 | 13176800 | 0.525397    | Copy gain    |
| BGC823 | chr12 | 13176801 | 13843200 | 0.0764974   | Copy neutral |
| BGC823 | chr12 | 13843201 | 14213500 | -0.0357026  | Copy neutral |
| BGC823 | chr12 | 14213501 | 14218400 | -0.938903   | Copy loss    |
| BGC823 | chr12 | 14218401 | 14289800 | 0.0270974   | Copy neutral |
| BGC823 | chr12 | 14289801 | 14519400 | -0.286103   | Copy neutral |
| BGC823 | chr12 | 14519401 | 14968100 | -0.0719026  | Copy neutral |
| BGC823 | chr12 | 14968101 | 16017400 | 0.0371974   | Copy neutral |
| BGC823 | chr12 | 16017401 | 19485900 | -0.0351026  | Copy neutral |
| BGC823 | chr12 | 19485901 | 19576200 | -0.423403   | Copy neutral |
| BGC823 | chr12 | 19576201 | 19819100 | -0.0588026  | Copy neutral |
| BGC823 | chr12 | 19819101 | 21439250 | 0.0714974   | Copy neutral |
| BGC823 | chr12 | 21439251 | 22372700 | -0.0504026  | Copy neutral |
| BGC823 | chr12 | 22372701 | 24714200 | 0.896797    | Copy gain    |
| BGC823 | chr12 | 24714201 | 24717000 | -0.296203   | Copy neutral |
| BGC823 | chr12 | 24717001 | 25580100 | 0.878297    | Copy gain    |
| BGC823 | chr12 | 25580101 | 29943200 | 0.989297    | Copy gain    |
| BGC823 | chr12 | 29943201 | 29947400 | 2.0402      | Copy gain    |
| BGC823 | chr12 | 29947401 | 30286200 | 1.0698      | Copy gain    |
| BGC823 | chr12 | 30286201 | 31161900 | 0.959597    | Copy gain    |
| BGC823 | chr12 | 31161901 | 31269700 | 1.1122      | Copy gain    |
| BGC823 | chr12 | 31269701 | 31276700 | 0.214897    | Copy neutral |

|        |       |          |          |             |              |
|--------|-------|----------|----------|-------------|--------------|
| BGC823 | chr12 | 31276701 | 31378200 | 1.113       | Copy gain    |
| BGC823 | chr12 | 31378201 | 31476200 | 0.923997    | Copy gain    |
| BGC823 | chr12 | 31476201 | 31605000 | 0.693197    | Copy gain    |
| BGC823 | chr12 | 31605001 | 31908800 | 0.892997    | Copy gain    |
| BGC823 | chr12 | 31908801 | 31939600 | 0.694497    | Copy gain    |
| BGC823 | chr12 | 31939601 | 31952200 | 0.125497    | Copy neutral |
| BGC823 | chr12 | 31952201 | 31954300 | -8.3671     | Copy loss    |
| BGC823 | chr12 | 31954301 | 32295900 | 0.305297    | Copy neutral |
| BGC823 | chr12 | 32295901 | 32526200 | 0.475597    | Copy gain    |
| BGC823 | chr12 | 32526201 | 32528300 | -0.835003   | Copy loss    |
| BGC823 | chr12 | 32528301 | 32538800 | 0.623897    | Copy gain    |
| BGC823 | chr12 | 32538801 | 32566100 | 0.0337974   | Copy neutral |
| BGC823 | chr12 | 32566101 | 32802700 | 0.513497    | Copy gain    |
| BGC823 | chr12 | 32802701 | 32879000 | 0.309697    | Copy neutral |
| BGC823 | chr12 | 32879001 | 34351800 | 0.566597    | Copy gain    |
| BGC823 | chr12 | 34351801 | 34486900 | 0.305397    | Copy neutral |
| BGC823 | chr12 | 34486901 | 34506500 | -0.0109026  | Copy neutral |
| BGC823 | chr12 | 34506501 | 34617450 | 0.410997    | Copy neutral |
| BGC823 | chr12 | 34617451 | 34622000 | 0.811797    | Copy gain    |
| BGC823 | chr12 | 34622001 | 34631100 | 0.420097    | Copy neutral |
| BGC823 | chr12 | 34631101 | 34635300 | 0.920597    | Copy gain    |
| BGC823 | chr12 | 34635301 | 34659800 | 0.280897    | Copy neutral |
| BGC823 | chr12 | 34659801 | 34685700 | 0.407297    | Copy neutral |
| BGC823 | chr12 | 34685701 | 34724900 | 0.221597    | Copy neutral |
| BGC823 | chr12 | 34724901 | 34830600 | 0.464097    | Copy gain    |
| BGC823 | chr12 | 34830601 | 34842500 | 1.199       | Copy gain    |
| BGC823 | chr12 | 34842501 | 34856695 | 0.0464974   | Copy neutral |
| BGC823 | chr12 | 37856694 | 46412800 | 0.929997    | Copy gain    |
| BGC823 | chr12 | 46412801 | 46660600 | 1.0956      | Copy gain    |
| BGC823 | chr12 | 46660601 | 46664100 | 0.380197    | Copy neutral |
| BGC823 | chr12 | 46664101 | 46764900 | 1.1649      | Copy gain    |
| BGC823 | chr12 | 46764901 | 46767000 | -0.00920263 | Copy neutral |
| BGC823 | chr12 | 46767001 | 47585300 | 1.1251      | Copy gain    |
| BGC823 | chr12 | 47585301 | 47800900 | 0.933997    | Copy gain    |
| BGC823 | chr12 | 47800901 | 47993400 | 1.0987      | Copy gain    |
| BGC823 | chr12 | 47993401 | 48151600 | 1.4244      | Copy gain    |
| BGC823 | chr12 | 48151601 | 48215300 | 1.1586      | Copy gain    |
| BGC823 | chr12 | 48215301 | 48447000 | 1.3738      | Copy gain    |
| BGC823 | chr12 | 48447001 | 48451900 | 0.490497    | Copy gain    |
| BGC823 | chr12 | 48451901 | 48762700 | 0.993897    | Copy gain    |
| BGC823 | chr12 | 48762701 | 48873300 | 1.1956      | Copy gain    |
| BGC823 | chr12 | 48873301 | 49035000 | 1.0406      | Copy gain    |
| BGC823 | chr12 | 49035001 | 49933800 | 0.807597    | Copy gain    |
| BGC823 | chr12 | 49933801 | 50401400 | 0.969897    | Copy gain    |
| BGC823 | chr12 | 50401401 | 51217600 | 0.828497    | Copy gain    |
| BGC823 | chr12 | 51217601 | 51391200 | 1.0195      | Copy gain    |
| BGC823 | chr12 | 51391201 | 51821000 | 0.818397    | Copy gain    |
| BGC823 | chr12 | 51821001 | 51926000 | 1.0286      | Copy gain    |
| BGC823 | chr12 | 51926001 | 51931600 | 0.423897    | Copy neutral |
| BGC823 | chr12 | 51931601 | 52202500 | 1.0379      | Copy gain    |
| BGC823 | chr12 | 52202501 | 52635100 | 0.909497    | Copy gain    |
| BGC823 | chr12 | 52635101 | 53256000 | 1.1206      | Copy gain    |

|        |       |           |           |            |              |
|--------|-------|-----------|-----------|------------|--------------|
| BGC823 | chr12 | 53256001  | 53375700  | 0.814297   | Copy gain    |
| BGC823 | chr12 | 53375701  | 53377800  | -0.509103  | Copy loss    |
| BGC823 | chr12 | 53377801  | 53740400  | 0.869997   | Copy gain    |
| BGC823 | chr12 | 53740401  | 53804800  | 0.528397   | Copy gain    |
| BGC823 | chr12 | 53804801  | 54093900  | 0.815097   | Copy gain    |
| BGC823 | chr12 | 54093901  | 54319300  | 1.0939     | Copy gain    |
| BGC823 | chr12 | 54319301  | 54476800  | 0.599497   | Copy gain    |
| BGC823 | chr12 | 54476801  | 54517400  | 1.3502     | Copy gain    |
| BGC823 | chr12 | 54517401  | 54608400  | 1.0082     | Copy gain    |
| BGC823 | chr12 | 54608401  | 54708500  | 0.891497   | Copy gain    |
| BGC823 | chr12 | 54708501  | 54730900  | 0.531097   | Copy gain    |
| BGC823 | chr12 | 54730901  | 54901000  | 0.923197   | Copy gain    |
| BGC823 | chr12 | 54901001  | 55895000  | 1.0302     | Copy gain    |
| BGC823 | chr12 | 55895001  | 55984950  | 1.2019     | Copy gain    |
| BGC823 | chr12 | 55984951  | 55989500  | 2.0277     | Copy gain    |
| BGC823 | chr12 | 55989501  | 56032200  | 1.2022     | Copy gain    |
| BGC823 | chr12 | 56032201  | 56098700  | 0.975497   | Copy gain    |
| BGC823 | chr12 | 56098701  | 56408800  | 0.821897   | Copy gain    |
| BGC823 | chr12 | 56408801  | 57068200  | 0.396397   | Copy neutral |
| BGC823 | chr12 | 57068201  | 57100400  | -0.0554026 | Copy neutral |
| BGC823 | chr12 | 57100401  | 57187200  | 0.374797   | Copy neutral |
| BGC823 | chr12 | 57187201  | 57329300  | 0.635297   | Copy gain    |
| BGC823 | chr12 | 57329301  | 57356600  | 0.868997   | Copy gain    |
| BGC823 | chr12 | 57356601  | 57359400  | 0.220097   | Copy neutral |
| BGC823 | chr12 | 57359401  | 57381100  | 0.913297   | Copy gain    |
| BGC823 | chr12 | 57381101  | 57409800  | 0.608097   | Copy gain    |
| BGC823 | chr12 | 57409801  | 57417500  | 0.208097   | Copy neutral |
| BGC823 | chr12 | 57417501  | 57465100  | 0.714997   | Copy gain    |
| BGC823 | chr12 | 57465101  | 57488200  | 0.171697   | Copy neutral |
| BGC823 | chr12 | 57488201  | 57519700  | 0.642397   | Copy gain    |
| BGC823 | chr12 | 57519701  | 57524600  | -0.0255026 | Copy neutral |
| BGC823 | chr12 | 57524601  | 57593200  | 0.620297   | Copy gain    |
| BGC823 | chr12 | 57593201  | 57773100  | 0.420097   | Copy neutral |
| BGC823 | chr12 | 57773101  | 57945300  | -0.245003  | Copy neutral |
| BGC823 | chr12 | 57945301  | 58153200  | 0.434597   | Copy neutral |
| BGC823 | chr12 | 58153201  | 64267000  | 0.576797   | Copy gain    |
| BGC823 | chr12 | 64267001  | 64380400  | -0.0932026 | Copy neutral |
| BGC823 | chr12 | 64380401  | 64631700  | 0.549897   | Copy gain    |
| BGC823 | chr12 | 64631701  | 65102800  | 0.389997   | Copy neutral |
| BGC823 | chr12 | 65102801  | 65191000  | 0.480497   | Copy gain    |
| BGC823 | chr12 | 65191001  | 66100300  | 0.622297   | Copy gain    |
| BGC823 | chr12 | 66100301  | 68949300  | 0.522497   | Copy gain    |
| BGC823 | chr12 | 68949301  | 69245400  | 0.406997   | Copy neutral |
| BGC823 | chr12 | 69245401  | 70864500  | 0.548097   | Copy gain    |
| BGC823 | chr12 | 70864501  | 71602300  | 0.628897   | Copy gain    |
| BGC823 | chr12 | 71602301  | 71604400  | -8.3671    | Copy loss    |
| BGC823 | chr12 | 71604401  | 90486200  | 0.549097   | Copy gain    |
| BGC823 | chr12 | 90486201  | 90487600  | -8.3671    | Copy loss    |
| BGC823 | chr12 | 90487601  | 104808200 | 0.552197   | Copy gain    |
| BGC823 | chr12 | 104808201 | 105009800 | 1.0464     | Copy gain    |
| BGC823 | chr12 | 105009801 | 106958600 | 0.639097   | Copy gain    |
| BGC823 | chr12 | 106958601 | 106974000 | 0.511097   | Copy gain    |



|        |       |           |           |             |              |
|--------|-------|-----------|-----------|-------------|--------------|
| BGC823 | chr12 | 106974001 | 106981700 | -0.135103   | Copy neutral |
| BGC823 | chr12 | 106981701 | 106988700 | 0.460997    | Copy gain    |
| BGC823 | chr12 | 106988701 | 108010700 | 0.570797    | Copy gain    |
| BGC823 | chr12 | 108010701 | 108299100 | 0.457797    | Copy gain    |
| BGC823 | chr12 | 108299101 | 109123700 | 0.604197    | Copy gain    |
| BGC823 | chr12 | 109123701 | 109373471 | 0.449497    | Copy neutral |
| BGC823 | chr12 | 109423470 | 121965037 | 0.449497    | Copy neutral |
| BGC823 | chr12 | 121965236 | 122530624 | 0.449497    | Copy neutral |
| BGC823 | chr12 | 122580623 | 123928081 | 0.449497    | Copy neutral |
| BGC823 | chr12 | 123928280 | 123960722 | 0.449497    | Copy neutral |
| BGC823 | chr12 | 123960821 | 128491300 | 0.449497    | Copy neutral |
| BGC823 | chr12 | 128491301 | 128569000 | 0.778597    | Copy gain    |
| BGC823 | chr12 | 128569001 | 128570400 | -4.3457     | Copy loss    |
| BGC823 | chr12 | 128570401 | 128940700 | 0.852297    | Copy gain    |
| BGC823 | chr12 | 128940701 | 129130400 | 0.418697    | Copy neutral |
| BGC823 | chr12 | 129130401 | 129133900 | 1.2986      | Copy gain    |
| BGC823 | chr12 | 129133901 | 129243800 | 0.470097    | Copy gain    |
| BGC823 | chr12 | 129243801 | 129490900 | 0.206997    | Copy neutral |
| BGC823 | chr12 | 129490901 | 129523800 | 0.406797    | Copy neutral |
| BGC823 | chr12 | 129523801 | 129870300 | 0.495897    | Copy gain    |
| BGC823 | chr12 | 129870301 | 129874500 | 1.7089      | Copy gain    |
| BGC823 | chr12 | 129874501 | 130876200 | 0.548597    | Copy gain    |
| BGC823 | chr12 | 130876201 | 130878300 | 1.9823      | Copy gain    |
| BGC823 | chr12 | 130878301 | 130904200 | 0.579797    | Copy gain    |
| BGC823 | chr12 | 130904201 | 131248600 | 0.463297    | Copy gain    |
| BGC823 | chr12 | 131248601 | 131251400 | 1.6837      | Copy gain    |
| BGC823 | chr12 | 131251401 | 131419400 | 0.382997    | Copy neutral |
| BGC823 | chr12 | 131419401 | 131631500 | 0.509597    | Copy gain    |
| BGC823 | chr12 | 131631501 | 131653200 | 0.739097    | Copy gain    |
| BGC823 | chr12 | 131653201 | 131655300 | -0.315803   | Copy neutral |
| BGC823 | chr12 | 131655301 | 131698000 | 0.780697    | Copy gain    |
| BGC823 | chr12 | 131698001 | 131783050 | 0.538097    | Copy gain    |
| BGC823 | chr12 | 131783051 | 131792500 | -2.1264     | Copy loss    |
| BGC823 | chr12 | 131792501 | 132262900 | 0.597197    | Copy gain    |
| BGC823 | chr12 | 132262901 | 132706993 | 0.356697    | Copy neutral |
| BGC823 | chr12 | 132806992 | 133841896 | 0.356697    | Copy neutral |
| BGC823 | chr12 | 133851895 | 133851895 | 0.356697    | Copy neutral |
| BGC823 | chr13 | 19020000  | 19115600  | 0.865197    | Copy gain    |
| BGC823 | chr13 | 19115601  | 19377400  | -0.00610263 | Copy neutral |
| BGC823 | chr13 | 19377401  | 19446000  | 0.218197    | Copy neutral |
| BGC823 | chr13 | 19446001  | 19448800  | 1.2732      | Copy gain    |
| BGC823 | chr13 | 19448801  | 19641300  | -0.0702026  | Copy neutral |
| BGC823 | chr13 | 19641301  | 19651800  | 0.858697    | Copy gain    |
| BGC823 | chr13 | 19651801  | 19761700  | -0.230703   | Copy neutral |
| BGC823 | chr13 | 19761701  | 19773950  | -0.915603   | Copy loss    |
| BGC823 | chr13 | 19773951  | 19805100  | -0.214303   | Copy neutral |
| BGC823 | chr13 | 19805101  | 19917800  | 0.0806974   | Copy neutral |
| BGC823 | chr13 | 19917801  | 19968900  | -0.328303   | Copy neutral |
| BGC823 | chr13 | 19968901  | 20307700  | -0.0451026  | Copy neutral |
| BGC823 | chr13 | 20307701  | 20370000  | -0.529603   | Copy loss    |
| BGC823 | chr13 | 20370001  | 20371400  | 1.1556      | Copy gain    |
| BGC823 | chr13 | 20371401  | 20513500  | -0.396803   | Copy neutral |

|        |       |          |           |            |              |
|--------|-------|----------|-----------|------------|--------------|
| BGC823 | chr13 | 20513501 | 21454300  | -0.120303  | Copy neutral |
| BGC823 | chr13 | 21454301 | 21772800  | -0.270203  | Copy neutral |
| BGC823 | chr13 | 21772801 | 22593900  | -0.0872026 | Copy neutral |
| BGC823 | chr13 | 22593901 | 22596700  | -4.3272    | Copy loss    |
| BGC823 | chr13 | 22596701 | 33175100  | -0.0963026 | Copy neutral |
| BGC823 | chr13 | 33175101 | 43325800  | -0.0127026 | Copy neutral |
| BGC823 | chr13 | 43325801 | 43522500  | 0.614997   | Copy gain    |
| BGC823 | chr13 | 43522501 | 43614900  | -0.0632026 | Copy neutral |
| BGC823 | chr13 | 43614901 | 45123400  | 0.0549974  | Copy neutral |
| BGC823 | chr13 | 45123401 | 45997700  | -0.159903  | Copy neutral |
| BGC823 | chr13 | 45997701 | 45999100  | -8.3671    | Copy loss    |
| BGC823 | chr13 | 45999101 | 46893700  | -0.0374026 | Copy neutral |
| BGC823 | chr13 | 46893701 | 46978400  | -0.284003  | Copy neutral |
| BGC823 | chr13 | 46978401 | 47037900  | 0.209097   | Copy neutral |
| BGC823 | chr13 | 47037901 | 47344500  | -0.125203  | Copy neutral |
| BGC823 | chr13 | 47344501 | 48503000  | 0.0146974  | Copy neutral |
| BGC823 | chr13 | 48503001 | 48896400  | -0.107203  | Copy neutral |
| BGC823 | chr13 | 48896401 | 49511000  | 0.105097   | Copy neutral |
| BGC823 | chr13 | 49511001 | 49848400  | 0.657797   | Copy gain    |
| BGC823 | chr13 | 49848401 | 50108800  | -0.0178026 | Copy neutral |
| BGC823 | chr13 | 50108801 | 50720600  | -0.175603  | Copy neutral |
| BGC823 | chr13 | 50720601 | 51072000  | -0.0247026 | Copy neutral |
| BGC823 | chr13 | 51072001 | 51073400  | -2.8787    | Copy loss    |
| BGC823 | chr13 | 51073401 | 52619000  | -0.0563026 | Copy neutral |
| BGC823 | chr13 | 52619001 | 52620400  | -1.9164    | Copy loss    |
| BGC823 | chr13 | 52620401 | 52774400  | -0.207003  | Copy neutral |
| BGC823 | chr13 | 52774401 | 52920700  | 0.0850974  | Copy neutral |
| BGC823 | chr13 | 52920701 | 53034800  | -0.276903  | Copy neutral |
| BGC823 | chr13 | 53034801 | 55878200  | -0.0830026 | Copy neutral |
| BGC823 | chr13 | 55878201 | 57752800  | 0.868297   | Copy gain    |
| BGC823 | chr13 | 57752801 | 57788500  | -1.1417    | Copy loss    |
| BGC823 | chr13 | 57788501 | 59795400  | 0.866397   | Copy gain    |
| BGC823 | chr13 | 59795401 | 63618800  | 0.928697   | Copy gain    |
| BGC823 | chr13 | 63618801 | 63650300  | 1.3467     | Copy gain    |
| BGC823 | chr13 | 63650301 | 64311100  | 0.951497   | Copy gain    |
| BGC823 | chr13 | 64311101 | 64316000  | 0.250697   | Copy neutral |
| BGC823 | chr13 | 64316001 | 64411200  | 1.1112     | Copy gain    |
| BGC823 | chr13 | 64411201 | 64418900  | 0.279897   | Copy neutral |
| BGC823 | chr13 | 64418901 | 66893400  | 0.959297   | Copy gain    |
| BGC823 | chr13 | 66893401 | 66899700  | -0.834003  | Copy loss    |
| BGC823 | chr13 | 66899701 | 67335800  | 0.936397   | Copy gain    |
| BGC823 | chr13 | 67335801 | 67341400  | -0.963303  | Copy loss    |
| BGC823 | chr13 | 67341401 | 69906200  | 0.906497   | Copy gain    |
| BGC823 | chr13 | 69906201 | 70018900  | 1.2194     | Copy gain    |
| BGC823 | chr13 | 70018901 | 70125300  | 0.935897   | Copy gain    |
| BGC823 | chr13 | 70125301 | 70128100  | -0.917503  | Copy loss    |
| BGC823 | chr13 | 70128101 | 72625000  | 0.853697   | Copy gain    |
| BGC823 | chr13 | 72625001 | 73540600  | 1.2953     | Copy gain    |
| BGC823 | chr13 | 73540601 | 73710700  | 1.1368     | Copy gain    |
| BGC823 | chr13 | 73710701 | 73976000  | 1.3646     | Copy gain    |
| BGC823 | chr13 | 73976001 | 86760325  | 0.935297   | Copy gain    |
| BGC823 | chr13 | 86910324 | 109790800 | 0.935297   | Copy gain    |

|        |       |           |           |             |              |
|--------|-------|-----------|-----------|-------------|--------------|
| BGC823 | chr13 | 109790801 | 110440400 | 0.649597    | Copy gain    |
| BGC823 | chr13 | 110440401 | 112353995 | 0.898697    | Copy gain    |
| BGC823 | chr13 | 112503994 | 114325994 | 0.898697    | Copy gain    |
| BGC823 | chr13 | 114425993 | 114639949 | 0.898697    | Copy gain    |
| BGC823 | chr13 | 114739948 | 114920400 | 0.898697    | Copy gain    |
| BGC823 | chr13 | 114920401 | 114921800 | -4.599      | Copy loss    |
| BGC823 | chr13 | 114921801 | 115109879 | 0.914597    | Copy gain    |
| BGC823 | chr13 | 115169878 | 115169878 | 0.914597    | Copy gain    |
| BGC823 | chr14 | 19000000  | 19050500  | 1.5123      | Copy gain    |
| BGC823 | chr14 | 19050501  | 19138700  | 0.915797    | Copy gain    |
| BGC823 | chr14 | 19138701  | 19401550  | 0.184397    | Copy neutral |
| BGC823 | chr14 | 19401551  | 19443900  | -0.354303   | Copy neutral |
| BGC823 | chr14 | 19443901  | 19448100  | 0.348897    | Copy neutral |
| BGC823 | chr14 | 19448101  | 19473300  | -1.5961     | Copy loss    |
| BGC823 | chr14 | 19473301  | 34909700  | -0.0398026  | Copy neutral |
| BGC823 | chr14 | 34909701  | 34953800  | -0.306103   | Copy neutral |
| BGC823 | chr14 | 34953801  | 35118300  | -0.485903   | Copy loss    |
| BGC823 | chr14 | 35118301  | 35615300  | -0.254503   | Copy neutral |
| BGC823 | chr14 | 35615301  | 35655200  | 0.0781974   | Copy neutral |
| BGC823 | chr14 | 35655201  | 35925400  | -0.159403   | Copy neutral |
| BGC823 | chr14 | 35925401  | 36256500  | 0.0478974   | Copy neutral |
| BGC823 | chr14 | 36256501  | 36281700  | -0.439103   | Copy neutral |
| BGC823 | chr14 | 36281701  | 36971900  | 0.0419974   | Copy neutral |
| BGC823 | chr14 | 36971901  | 36994300  | -0.390003   | Copy neutral |
| BGC823 | chr14 | 36994301  | 37769900  | 0.0303974   | Copy neutral |
| BGC823 | chr14 | 37769901  | 37771300  | -5.2507     | Copy loss    |
| BGC823 | chr14 | 37771301  | 38063900  | 0.0773974   | Copy neutral |
| BGC823 | chr14 | 38063901  | 38065300  | -4.7911     | Copy loss    |
| BGC823 | chr14 | 38065301  | 38582600  | 0.0947974   | Copy neutral |
| BGC823 | chr14 | 38582601  | 38743600  | 0.706697    | Copy gain    |
| BGC823 | chr14 | 38743601  | 39517800  | 0.111497    | Copy neutral |
| BGC823 | chr14 | 39517801  | 39770500  | -0.190303   | Copy neutral |
| BGC823 | chr14 | 39770501  | 40609800  | 0.0607974   | Copy neutral |
| BGC823 | chr14 | 40609801  | 40617500  | -8.0259     | Copy loss    |
| BGC823 | chr14 | 40617501  | 41610100  | 0.000697368 | Copy neutral |
| BGC823 | chr14 | 41610101  | 41668200  | -0.943703   | Copy loss    |
| BGC823 | chr14 | 41668201  | 42177100  | 0.00279737  | Copy neutral |
| BGC823 | chr14 | 42177101  | 42191100  | 0.539997    | Copy gain    |
| BGC823 | chr14 | 42191101  | 45346000  | 0.0308974   | Copy neutral |
| BGC823 | chr14 | 45346001  | 45759700  | -0.0968026  | Copy neutral |
| BGC823 | chr14 | 45759701  | 46748800  | 0.0766974   | Copy neutral |
| BGC823 | chr14 | 46748801  | 48670300  | -0.0606026  | Copy neutral |
| BGC823 | chr14 | 48670301  | 48749400  | 0.511097    | Copy gain    |
| BGC823 | chr14 | 48749401  | 48752900  | 0.990997    | Copy gain    |
| BGC823 | chr14 | 48752901  | 48763400  | 0.566997    | Copy gain    |
| BGC823 | chr14 | 48763401  | 63944300  | -0.0262026  | Copy neutral |
| BGC823 | chr14 | 63944301  | 64365700  | -0.232403   | Copy neutral |
| BGC823 | chr14 | 64365701  | 64768200  | -0.0577026  | Copy neutral |
| BGC823 | chr14 | 64768201  | 64885800  | -0.332003   | Copy neutral |
| BGC823 | chr14 | 64885801  | 65568300  | -0.0529026  | Copy neutral |
| BGC823 | chr14 | 65568301  | 65975700  | -0.234203   | Copy neutral |
| BGC823 | chr14 | 65975701  | 66854900  | -0.0275026  | Copy neutral |

|        |       |           |           |            |              |
|--------|-------|-----------|-----------|------------|--------------|
| BGC823 | chr14 | 66854901  | 67601800  | -0.873903  | Copy loss    |
| BGC823 | chr14 | 67601801  | 67794300  | -0.0417026 | Copy neutral |
| BGC823 | chr14 | 67794301  | 67820200  | 0.557497   | Copy gain    |
| BGC823 | chr14 | 67820201  | 68210100  | -0.108203  | Copy neutral |
| BGC823 | chr14 | 68210101  | 69190800  | 0.0512974  | Copy neutral |
| BGC823 | chr14 | 69190801  | 70241500  | -0.0647026 | Copy neutral |
| BGC823 | chr14 | 70241501  | 71634500  | 0.0200974  | Copy neutral |
| BGC823 | chr14 | 71634501  | 73348100  | -0.0785026 | Copy neutral |
| BGC823 | chr14 | 73348101  | 73996650  | -0.223403  | Copy neutral |
| BGC823 | chr14 | 73996651  | 74024650  | -1.1837    | Copy loss    |
| BGC823 | chr14 | 74024651  | 74851000  | -0.235103  | Copy neutral |
| BGC823 | chr14 | 74851001  | 75183500  | -0.0497026 | Copy neutral |
| BGC823 | chr14 | 75183501  | 75247200  | -0.293203  | Copy neutral |
| BGC823 | chr14 | 75247201  | 75331200  | 0.0281974  | Copy neutral |
| BGC823 | chr14 | 75331201  | 75777100  | -0.115103  | Copy neutral |
| BGC823 | chr14 | 75777101  | 76833400  | -0.0155026 | Copy neutral |
| BGC823 | chr14 | 76833401  | 77066500  | -0.219303  | Copy neutral |
| BGC823 | chr14 | 77066501  | 77182000  | -0.0603026 | Copy neutral |
| BGC823 | chr14 | 77182001  | 77435400  | 0.510297   | Copy gain    |
| BGC823 | chr14 | 77435401  | 77933100  | -0.0762026 | Copy neutral |
| BGC823 | chr14 | 77933101  | 78323700  | -0.256703  | Copy neutral |
| BGC823 | chr14 | 78323701  | 79777950  | -0.0535026 | Copy neutral |
| BGC823 | chr14 | 79777951  | 80270400  | -1.012     | Copy loss    |
| BGC823 | chr14 | 80270401  | 88929400  | -0.0231026 | Copy neutral |
| BGC823 | chr14 | 88929401  | 104444200 | -0.109403  | Copy neutral |
| BGC823 | chr14 | 104444201 | 107148300 | -0.0269026 | Copy neutral |
| BGC823 | chr14 | 107148301 | 107182600 | 0.893597   | Copy gain    |
| BGC823 | chr14 | 107182601 | 107289541 | -0.0104026 | Copy neutral |
| BGC823 | chr14 | 107349540 | 107349540 | -0.0104026 | Copy neutral |
| BGC823 | chr15 | 20000000  | 20106100  | 1.2462     | Copy gain    |
| BGC823 | chr15 | 20106101  | 20138300  | 2.1039     | Copy gain    |
| BGC823 | chr15 | 20138301  | 20148800  | 1.6199     | Copy gain    |
| BGC823 | chr15 | 20148801  | 20150200  | -4.4892    | Copy loss    |
| BGC823 | chr15 | 20150201  | 20248200  | 1.1112     | Copy gain    |
| BGC823 | chr15 | 20248201  | 20289150  | 2.157      | Copy gain    |
| BGC823 | chr15 | 20289151  | 20392400  | 0.926197   | Copy gain    |
| BGC823 | chr15 | 20392401  | 20444200  | 2.2703     | Copy gain    |
| BGC823 | chr15 | 20444201  | 20545700  | 2.6885     | Copy gain    |
| BGC823 | chr15 | 20545701  | 20549200  | 1.0799     | Copy gain    |
| BGC823 | chr15 | 20549201  | 20564600  | 2.526      | Copy gain    |
| BGC823 | chr15 | 20564601  | 20632150  | 2.9912     | Copy gain    |
| BGC823 | chr15 | 20632151  | 20878200  | 2.3482     | Copy gain    |
| BGC823 | chr15 | 20878201  | 20894634  | 1.137      | Copy gain    |
| BGC823 | chr15 | 20935075  | 21148750  | 1.137      | Copy gain    |
| BGC823 | chr15 | 21148751  | 21170800  | 2.1179     | Copy gain    |
| BGC823 | chr15 | 21170801  | 21398820  | 1.2451     | Copy gain    |
| BGC823 | chr15 | 21885000  | 21892150  | 1.2451     | Copy gain    |
| BGC823 | chr15 | 21892151  | 21942550  | 2.3959     | Copy gain    |
| BGC823 | chr15 | 21942551  | 21949550  | 0.738697   | Copy gain    |
| BGC823 | chr15 | 21949551  | 22093750  | 2.3176     | Copy gain    |
| BGC823 | chr15 | 22093751  | 22212115  | 1.6765     | Copy gain    |
| BGC823 | chr15 | 22262114  | 22390200  | 2.2418     | Copy gain    |

|        |       |          |          |             |              |
|--------|-------|----------|----------|-------------|--------------|
| BGC823 | chr15 | 22390201 | 22502200 | 2.4207      | Copy gain    |
| BGC823 | chr15 | 22502201 | 22513400 | 1.846       | Copy gain    |
| BGC823 | chr15 | 22513401 | 22544900 | 2.2387      | Copy gain    |
| BGC823 | chr15 | 22544901 | 22547000 | 0.780897    | Copy gain    |
| BGC823 | chr15 | 22547001 | 22596194 | 2.2337      | Copy gain    |
| BGC823 | chr15 | 22646193 | 22803200 | 0.989897    | Copy gain    |
| BGC823 | chr15 | 22803201 | 22807400 | -0.596703   | Copy loss    |
| BGC823 | chr15 | 22807401 | 22822100 | 1.0214      | Copy gain    |
| BGC823 | chr15 | 22822101 | 22834000 | 0.262797    | Copy neutral |
| BGC823 | chr15 | 22834001 | 23092300 | 0.800497    | Copy gain    |
| BGC823 | chr15 | 23092301 | 23514854 | 1.0511      | Copy gain    |
| BGC823 | chr15 | 23564853 | 23617300 | 1.0511      | Copy gain    |
| BGC823 | chr15 | 23617301 | 23619400 | -0.431503   | Copy neutral |
| BGC823 | chr15 | 23619401 | 23671900 | 0.779497    | Copy gain    |
| BGC823 | chr15 | 23671901 | 23676100 | -8.3671     | Copy loss    |
| BGC823 | chr15 | 23676101 | 24383100 | 0.912097    | Copy gain    |
| BGC823 | chr15 | 24383101 | 24439800 | 0.0535974   | Copy neutral |
| BGC823 | chr15 | 24439801 | 24509100 | 0.976097    | Copy gain    |
| BGC823 | chr15 | 24509101 | 24983000 | 0.566397    | Copy gain    |
| BGC823 | chr15 | 24983001 | 29159444 | 0.460797    | Copy gain    |
| BGC823 | chr15 | 29209443 | 30537850 | 0.460797    | Copy gain    |
| BGC823 | chr15 | 30537851 | 41766200 | 0.573497    | Copy gain    |
| BGC823 | chr15 | 41766201 | 56419300 | 0.936897    | Copy gain    |
| BGC823 | chr15 | 56419301 | 56744100 | 0.101797    | Copy neutral |
| BGC823 | chr15 | 56744101 | 62085100 | 0.960797    | Copy gain    |
| BGC823 | chr15 | 62085101 | 64588300 | -0.0660026  | Copy neutral |
| BGC823 | chr15 | 64588301 | 66927700 | -0.179203   | Copy neutral |
| BGC823 | chr15 | 66927701 | 68110700 | 0.0169974   | Copy neutral |
| BGC823 | chr15 | 68110701 | 68133800 | -0.328203   | Copy neutral |
| BGC823 | chr15 | 68133801 | 68427100 | -0.0191026  | Copy neutral |
| BGC823 | chr15 | 68427101 | 68429200 | -4.8246     | Copy loss    |
| BGC823 | chr15 | 68429201 | 68837300 | -0.0246026  | Copy neutral |
| BGC823 | chr15 | 68837301 | 69037500 | -0.145903   | Copy neutral |
| BGC823 | chr15 | 69037501 | 69052900 | -0.686403   | Copy loss    |
| BGC823 | chr15 | 69052901 | 69182400 | -0.158803   | Copy neutral |
| BGC823 | chr15 | 69182401 | 69741000 | -0.00100263 | Copy neutral |
| BGC823 | chr15 | 69741001 | 69771100 | -0.334803   | Copy neutral |
| BGC823 | chr15 | 69771101 | 70389900 | 0.0190974   | Copy neutral |
| BGC823 | chr15 | 70389901 | 70394100 | -0.913403   | Copy loss    |
| BGC823 | chr15 | 70394101 | 71020600 | 0.0414974   | Copy neutral |
| BGC823 | chr15 | 71020601 | 71134000 | -0.182603   | Copy neutral |
| BGC823 | chr15 | 71134001 | 71187900 | -0.0188026  | Copy neutral |
| BGC823 | chr15 | 71187901 | 71568700 | 0.102697    | Copy neutral |
| BGC823 | chr15 | 71568701 | 72571800 | -0.0267026  | Copy neutral |
| BGC823 | chr15 | 72571801 | 72575300 | -8.217      | Copy loss    |
| BGC823 | chr15 | 72575301 | 74429600 | -0.0697026  | Copy neutral |
| BGC823 | chr15 | 74429601 | 74810400 | 0.564697    | Copy gain    |
| BGC823 | chr15 | 74810401 | 75878600 | -0.120103   | Copy neutral |
| BGC823 | chr15 | 75878601 | 75929000 | 0.569397    | Copy gain    |
| BGC823 | chr15 | 75929001 | 75992000 | 0.893297    | Copy gain    |
| BGC823 | chr15 | 75992001 | 76669600 | 0.554297    | Copy gain    |
| BGC823 | chr15 | 76669601 | 76828500 | 0.687197    | Copy gain    |

|        |       |          |           |           |              |
|--------|-------|----------|-----------|-----------|--------------|
| BGC823 | chr15 | 76828501 | 76831300  | 2.1184    | Copy gain    |
| BGC823 | chr15 | 76831301 | 76884500  | 0.697197  | Copy gain    |
| BGC823 | chr15 | 76884501 | 76895700  | 0.193997  | Copy neutral |
| BGC823 | chr15 | 76895701 | 77187600  | 0.644897  | Copy gain    |
| BGC823 | chr15 | 77187601 | 78758400  | 0.546697  | Copy gain    |
| BGC823 | chr15 | 78758401 | 79263100  | 0.431997  | Copy neutral |
| BGC823 | chr15 | 79263101 | 79730000  | 0.629997  | Copy gain    |
| BGC823 | chr15 | 79730001 | 79731400  | -1.0685   | Copy loss    |
| BGC823 | chr15 | 79731401 | 80149300  | 0.605897  | Copy gain    |
| BGC823 | chr15 | 80149301 | 80297000  | 0.361797  | Copy neutral |
| BGC823 | chr15 | 80297001 | 80298400  | -4.5262   | Copy loss    |
| BGC823 | chr15 | 80298401 | 80362800  | 0.293497  | Copy neutral |
| BGC823 | chr15 | 80362801 | 82324200  | 0.521097  | Copy gain    |
| BGC823 | chr15 | 82324201 | 82397000  | 0.356697  | Copy neutral |
| BGC823 | chr15 | 82397001 | 82401900  | -1.7342   | Copy loss    |
| BGC823 | chr15 | 82401901 | 82829646  | 0.589997  | Copy gain    |
| BGC823 | chr15 | 82879645 | 83245400  | 0.589997  | Copy gain    |
| BGC823 | chr15 | 83245401 | 83777400  | 0.394797  | Copy neutral |
| BGC823 | chr15 | 83777401 | 83940500  | 0.565197  | Copy gain    |
| BGC823 | chr15 | 83940501 | 84182000  | 0.411097  | Copy neutral |
| BGC823 | chr15 | 84182001 | 84845950  | 0.554597  | Copy gain    |
| BGC823 | chr15 | 84845951 | 84891100  | 2.0073    | Copy gain    |
| BGC823 | chr15 | 84891101 | 84984474  | 0.662797  | Copy gain    |
| BGC823 | chr15 | 85034473 | 85142400  | 0.662797  | Copy gain    |
| BGC823 | chr15 | 85142401 | 85302000  | 0.385897  | Copy neutral |
| BGC823 | chr15 | 85302001 | 86273600  | 0.594097  | Copy gain    |
| BGC823 | chr15 | 86273601 | 86405900  | 0.402497  | Copy neutral |
| BGC823 | chr15 | 86405901 | 86608200  | 0.592597  | Copy gain    |
| BGC823 | chr15 | 86608201 | 87822700  | 0.961597  | Copy gain    |
| BGC823 | chr15 | 87822701 | 90546400  | 0.522997  | Copy gain    |
| BGC823 | chr15 | 90546401 | 91021000  | 0.851997  | Copy gain    |
| BGC823 | chr15 | 91021001 | 91413000  | 1.2318    | Copy gain    |
| BGC823 | chr15 | 91413001 | 91595000  | 0.869397  | Copy gain    |
| BGC823 | chr15 | 91595001 | 93254000  | 1.0528    | Copy gain    |
| BGC823 | chr15 | 93254001 | 93298800  | 0.866397  | Copy gain    |
| BGC823 | chr15 | 93298801 | 93303700  | 1.5377    | Copy gain    |
| BGC823 | chr15 | 93303701 | 93314200  | 0.855197  | Copy gain    |
| BGC823 | chr15 | 93314201 | 93316300  | -0.697403 | Copy loss    |
| BGC823 | chr15 | 93316301 | 93453500  | 0.818697  | Copy gain    |
| BGC823 | chr15 | 93453501 | 93571100  | 1.1031    | Copy gain    |
| BGC823 | chr15 | 93571101 | 94017700  | 0.912397  | Copy gain    |
| BGC823 | chr15 | 94017701 | 94691100  | 1.0014    | Copy gain    |
| BGC823 | chr15 | 94691101 | 94695300  | 1.6833    | Copy gain    |
| BGC823 | chr15 | 94695301 | 94786300  | 0.991497  | Copy gain    |
| BGC823 | chr15 | 94786301 | 94788400  | 2.0529    | Copy gain    |
| BGC823 | chr15 | 94788401 | 95351900  | 1.0037    | Copy gain    |
| BGC823 | chr15 | 95351901 | 96863900  | 0.919497  | Copy gain    |
| BGC823 | chr15 | 96863901 | 96912900  | 0.445497  | Copy neutral |
| BGC823 | chr15 | 96912901 | 96950700  | 0.948697  | Copy gain    |
| BGC823 | chr15 | 96950701 | 96961200  | 0.424197  | Copy neutral |
| BGC823 | chr15 | 96961201 | 97655600  | 1.0258    | Copy gain    |
| BGC823 | chr15 | 97655601 | 102521393 | 0.557997  | Copy gain    |

|        |       |           |           |            |              |
|--------|-------|-----------|-----------|------------|--------------|
| BGC823 | chr15 | 102531392 | 102531392 | 0.557997   | Copy gain    |
| BGC823 | chr16 | 60000     | 1202600   | 0.258897   | Copy neutral |
| BGC823 | chr16 | 1202601   | 1204000   | -8.3671    | Copy loss    |
| BGC823 | chr16 | 1204001   | 4867100   | 0.335097   | Copy neutral |
| BGC823 | chr16 | 4867101   | 5112800   | 0.415997   | Copy neutral |
| BGC823 | chr16 | 5112801   | 5943700   | 0.553697   | Copy gain    |
| BGC823 | chr16 | 5943701   | 6967100   | 0.433497   | Copy neutral |
| BGC823 | chr16 | 6967101   | 7105000   | 0.267197   | Copy neutral |
| BGC823 | chr16 | 7105001   | 8224300   | 0.431597   | Copy neutral |
| BGC823 | chr16 | 8224301   | 8636922   | 0.556397   | Copy gain    |
| BGC823 | chr16 | 8686921   | 8708700   | 0.556397   | Copy gain    |
| BGC823 | chr16 | 8708701   | 8754200   | 0.411897   | Copy neutral |
| BGC823 | chr16 | 8754201   | 8757000   | -0.893003  | Copy loss    |
| BGC823 | chr16 | 8757001   | 9036300   | 0.420597   | Copy neutral |
| BGC823 | chr16 | 9036301   | 9058000   | -0.0514026 | Copy neutral |
| BGC823 | chr16 | 9058001   | 9176300   | -0.506903  | Copy loss    |
| BGC823 | chr16 | 9176301   | 9188200   | 0.208697   | Copy neutral |
| BGC823 | chr16 | 9188201   | 9214100   | 0.588497   | Copy gain    |
| BGC823 | chr16 | 9214101   | 9275700   | 0.281597   | Copy neutral |
| BGC823 | chr16 | 9275701   | 10273200  | 0.577397   | Copy gain    |
| BGC823 | chr16 | 10273201  | 10413900  | 0.384097   | Copy neutral |
| BGC823 | chr16 | 10413901  | 10415300  | -4.8902    | Copy loss    |
| BGC823 | chr16 | 10415301  | 14984900  | 0.501397   | Copy gain    |
| BGC823 | chr16 | 14984901  | 15124200  | 1.4752     | Copy gain    |
| BGC823 | chr16 | 15124201  | 15250200  | 0.468997   | Copy gain    |
| BGC823 | chr16 | 15250201  | 15487500  | 0.918497   | Copy gain    |
| BGC823 | chr16 | 15487501  | 15792000  | 0.437297   | Copy neutral |
| BGC823 | chr16 | 15792001  | 16090900  | 0.878997   | Copy gain    |
| BGC823 | chr16 | 16090901  | 16329950  | 0.454997   | Copy gain    |
| BGC823 | chr16 | 16329951  | 16529100  | -0.517303  | Copy loss    |
| BGC823 | chr16 | 16529101  | 16725100  | 0.493997   | Copy gain    |
| BGC823 | chr16 | 16725101  | 16747500  | 1.3182     | Copy gain    |
| BGC823 | chr16 | 16747501  | 16759050  | -0.217203  | Copy neutral |
| BGC823 | chr16 | 16759051  | 17126900  | 0.471697   | Copy gain    |
| BGC823 | chr16 | 17126901  | 17145100  | 0.992197   | Copy gain    |
| BGC823 | chr16 | 17145101  | 18287500  | 0.449597   | Copy neutral |
| BGC823 | chr16 | 18287501  | 18296600  | -0.341503  | Copy neutral |
| BGC823 | chr16 | 18296601  | 18608100  | 0.726697   | Copy gain    |
| BGC823 | chr16 | 18608101  | 18693500  | 1.2239     | Copy gain    |
| BGC823 | chr16 | 18693501  | 18718000  | 0.786797   | Copy gain    |
| BGC823 | chr16 | 18718001  | 18737600  | -0.468403  | Copy loss    |
| BGC823 | chr16 | 18737601  | 18757200  | 0.730297   | Copy gain    |
| BGC823 | chr16 | 18757201  | 18765950  | -1.4016    | Copy loss    |
| BGC823 | chr16 | 18765951  | 18915400  | 0.503097   | Copy gain    |
| BGC823 | chr16 | 18915401  | 19081300  | 0.308697   | Copy neutral |
| BGC823 | chr16 | 19081301  | 19476100  | 0.545197   | Copy gain    |
| BGC823 | chr16 | 19476101  | 19931100  | 0.413197   | Copy neutral |
| BGC823 | chr16 | 19931101  | 20507200  | 0.556297   | Copy gain    |
| BGC823 | chr16 | 20507201  | 20539400  | -1.0966    | Copy loss    |
| BGC823 | chr16 | 20539401  | 20923000  | 0.568797   | Copy gain    |
| BGC823 | chr16 | 20923001  | 21203000  | 0.395097   | Copy neutral |
| BGC823 | chr16 | 21203001  | 21340200  | 0.529097   | Copy gain    |

|        |       |          |          |            |              |
|--------|-------|----------|----------|------------|--------------|
| BGC823 | chr16 | 21340201 | 21344400 | 1.1674     | Copy gain    |
| BGC823 | chr16 | 21344401 | 21516600 | 0.609097   | Copy gain    |
| BGC823 | chr16 | 21516601 | 21593600 | 1.3865     | Copy gain    |
| BGC823 | chr16 | 21593601 | 21740600 | 0.448197   | Copy neutral |
| BGC823 | chr16 | 21740601 | 21830200 | 0.937797   | Copy gain    |
| BGC823 | chr16 | 21830201 | 22184400 | 0.546897   | Copy gain    |
| BGC823 | chr16 | 22184401 | 22552600 | 0.384897   | Copy neutral |
| BGC823 | chr16 | 22552601 | 22711500 | 1.6366     | Copy gain    |
| BGC823 | chr16 | 22711501 | 23154600 | 0.552797   | Copy gain    |
| BGC823 | chr16 | 23154601 | 23541700 | 0.363597   | Copy neutral |
| BGC823 | chr16 | 23541701 | 23625000 | -0.259303  | Copy neutral |
| BGC823 | chr16 | 23625001 | 29817200 | 0.479297   | Copy gain    |
| BGC823 | chr16 | 29817201 | 29818600 | -8.3671    | Copy loss    |
| BGC823 | chr16 | 29818601 | 32037600 | 0.387497   | Copy neutral |
| BGC823 | chr16 | 32037601 | 32099900 | 0.787197   | Copy gain    |
| BGC823 | chr16 | 32099901 | 32112850 | 3.2115     | Copy gain    |
| BGC823 | chr16 | 32112851 | 32144000 | 1.7127     | Copy gain    |
| BGC823 | chr16 | 32144001 | 32280500 | 1.2274     | Copy gain    |
| BGC823 | chr16 | 32280501 | 32513600 | 0.879997   | Copy gain    |
| BGC823 | chr16 | 32513601 | 32531100 | 1.2453     | Copy gain    |
| BGC823 | chr16 | 32531101 | 32533900 | 0.757597   | Copy gain    |
| BGC823 | chr16 | 32533901 | 32562600 | 1.3612     | Copy gain    |
| BGC823 | chr16 | 32562601 | 32603200 | 0.244697   | Copy neutral |
| BGC823 | chr16 | 32603201 | 32634700 | 0.564897   | Copy gain    |
| BGC823 | chr16 | 32634701 | 32739700 | 0.247497   | Copy neutral |
| BGC823 | chr16 | 32739701 | 32826500 | 1.6117     | Copy gain    |
| BGC823 | chr16 | 32826501 | 32842600 | 2.2331     | Copy gain    |
| BGC823 | chr16 | 32842601 | 32852750 | 3.4978     | Copy gain    |
| BGC823 | chr16 | 32852751 | 32958450 | 0.632597   | Copy gain    |
| BGC823 | chr16 | 32958451 | 33351150 | 1.1721     | Copy gain    |
| BGC823 | chr16 | 33351151 | 33517400 | 0.486397   | Copy gain    |
| BGC823 | chr16 | 33517401 | 33525100 | 1.7027     | Copy gain    |
| BGC823 | chr16 | 33525101 | 33530700 | 0.675097   | Copy gain    |
| BGC823 | chr16 | 33530701 | 33552400 | 1.6236     | Copy gain    |
| BGC823 | chr16 | 33552401 | 33583200 | 0.533197   | Copy gain    |
| BGC823 | chr16 | 33583201 | 33586700 | 1.8383     | Copy gain    |
| BGC823 | chr16 | 33586701 | 33592300 | 1.0313     | Copy gain    |
| BGC823 | chr16 | 33592301 | 33743500 | 0.523097   | Copy gain    |
| BGC823 | chr16 | 33743501 | 33864600 | 0.836697   | Copy gain    |
| BGC823 | chr16 | 33864601 | 33922000 | 1.5528     | Copy gain    |
| BGC823 | chr16 | 33922001 | 33971000 | 2.4529     | Copy gain    |
| BGC823 | chr16 | 33971001 | 33976600 | 4.1652     | Copy gain    |
| BGC823 | chr16 | 33976601 | 33990250 | 2.5716     | Copy gain    |
| BGC823 | chr16 | 33990251 | 34023151 | 1.6148     | Copy gain    |
| BGC823 | chr16 | 34173150 | 34197100 | 1.6148     | Copy gain    |
| BGC823 | chr16 | 34197101 | 34507900 | 0.444797   | Copy neutral |
| BGC823 | chr16 | 34507901 | 34810300 | -0.0351026 | Copy neutral |
| BGC823 | chr16 | 34810301 | 34865600 | -0.338203  | Copy neutral |
| BGC823 | chr16 | 34865601 | 35285250 | 0.476397   | Copy gain    |
| BGC823 | chr16 | 46386550 | 46409300 | 9.4564     | Copy gain    |
| BGC823 | chr16 | 46409301 | 46435900 | 7.1312     | Copy gain    |
| BGC823 | chr16 | 46435901 | 46460400 | 1.7776     | Copy gain    |



|        |       |          |          |            |              |
|--------|-------|----------|----------|------------|--------------|
| BGC823 | chr16 | 46460401 | 46463200 | -0.374003  | Copy neutral |
| BGC823 | chr16 | 46463201 | 46490500 | 1.5033     | Copy gain    |
| BGC823 | chr16 | 46490501 | 46501000 | 2.246      | Copy gain    |
| BGC823 | chr16 | 46501001 | 46861500 | 0.542997   | Copy gain    |
| BGC823 | chr16 | 46861501 | 47113500 | 0.350797   | Copy neutral |
| BGC823 | chr16 | 47113501 | 48409900 | 0.569397   | Copy gain    |
| BGC823 | chr16 | 48409901 | 48509300 | 0.359997   | Copy neutral |
| BGC823 | chr16 | 48509301 | 48511400 | -8.1169    | Copy loss    |
| BGC823 | chr16 | 48511401 | 70494200 | 0.493197   | Copy gain    |
| BGC823 | chr16 | 70494201 | 70869750 | 0.860597   | Copy gain    |
| BGC823 | chr16 | 70869751 | 70977200 | 1.9633     | Copy gain    |
| BGC823 | chr16 | 70977201 | 70980000 | 1.1516     | Copy gain    |
| BGC823 | chr16 | 70980001 | 71202600 | 2.0015     | Copy gain    |
| BGC823 | chr16 | 71202601 | 71633800 | 0.956297   | Copy gain    |
| BGC823 | chr16 | 71633801 | 71841700 | 0.790897   | Copy gain    |
| BGC823 | chr16 | 71841701 | 71857100 | 0.313597   | Copy neutral |
| BGC823 | chr16 | 71857101 | 71925700 | 0.847597   | Copy gain    |
| BGC823 | chr16 | 71925701 | 71934100 | 0.0788974  | Copy neutral |
| BGC823 | chr16 | 71934101 | 72072000 | 0.868997   | Copy gain    |
| BGC823 | chr16 | 72072001 | 73091900 | 0.976597   | Copy gain    |
| BGC823 | chr16 | 73091901 | 73093300 | -4.5655    | Copy loss    |
| BGC823 | chr16 | 73093301 | 73105200 | 0.618197   | Copy gain    |
| BGC823 | chr16 | 73105201 | 73280900 | 1.0106     | Copy gain    |
| BGC823 | chr16 | 73280901 | 73282300 | 2.9167     | Copy gain    |
| BGC823 | chr16 | 73282301 | 74582200 | 0.940197   | Copy gain    |
| BGC823 | chr16 | 74582201 | 75588100 | 0.835697   | Copy gain    |
| BGC823 | chr16 | 75588101 | 75738600 | 0.559797   | Copy gain    |
| BGC823 | chr16 | 75738601 | 77754600 | 0.669197   | Copy gain    |
| BGC823 | chr16 | 77754601 | 78369900 | 0.544897   | Copy gain    |
| BGC823 | chr16 | 78369901 | 78385300 | 0.0642974  | Copy neutral |
| BGC823 | chr16 | 78385301 | 78462300 | 0.527097   | Copy gain    |
| BGC823 | chr16 | 78462301 | 78479100 | 1.2001     | Copy gain    |
| BGC823 | chr16 | 78479101 | 78598100 | 0.464397   | Copy gain    |
| BGC823 | chr16 | 78598101 | 78794100 | -0.0659026 | Copy neutral |
| BGC823 | chr16 | 78794101 | 78912400 | 0.489497   | Copy gain    |
| BGC823 | chr16 | 78912401 | 79237200 | -0.968003  | Copy loss    |
| BGC823 | chr16 | 79237201 | 79632000 | 0.596997   | Copy gain    |
| BGC823 | chr16 | 79632001 | 79636200 | -0.287503  | Copy neutral |
| BGC823 | chr16 | 79636201 | 79757300 | 0.603497   | Copy gain    |
| BGC823 | chr16 | 79757301 | 80430700 | 0.721197   | Copy gain    |
| BGC823 | chr16 | 80430701 | 80889200 | 0.826197   | Copy gain    |
| BGC823 | chr16 | 80889201 | 81037600 | 0.709497   | Copy gain    |
| BGC823 | chr16 | 81037601 | 81353300 | 0.539697   | Copy gain    |
| BGC823 | chr16 | 81353301 | 81424000 | 0.796897   | Copy gain    |
| BGC823 | chr16 | 81424001 | 81483500 | 0.440497   | Copy neutral |
| BGC823 | chr16 | 81483501 | 81743200 | 0.719397   | Copy gain    |
| BGC823 | chr16 | 81743201 | 81745300 | -0.706003  | Copy loss    |
| BGC823 | chr16 | 81745301 | 81981900 | 0.633097   | Copy gain    |
| BGC823 | chr16 | 81981901 | 82872300 | 0.760997   | Copy gain    |
| BGC823 | chr16 | 82872301 | 83960100 | 0.693197   | Copy gain    |
| BGC823 | chr16 | 83960101 | 88389384 | 0.523497   | Copy gain    |
| BGC823 | chr16 | 88439383 | 90294754 | 0.523497   | Copy gain    |

|        |       |          |          |            |              |
|--------|-------|----------|----------|------------|--------------|
| BGC823 | chr16 | 90354753 | 90354753 | 0.523497   | Copy gain    |
| BGC823 | chr17 | 1        | 296627   | -0.182403  | Copy neutral |
| BGC823 | chr17 | 396626   | 704200   | -0.182403  | Copy neutral |
| BGC823 | chr17 | 704201   | 881300   | -1.4726    | Copy loss    |
| BGC823 | chr17 | 881301   | 965300   | -0.228903  | Copy neutral |
| BGC823 | chr17 | 965301   | 968800   | 2.4401     | Copy gain    |
| BGC823 | chr17 | 968801   | 972300   | 0.159097   | Copy neutral |
| BGC823 | chr17 | 972301   | 1129100  | -0.276203  | Copy neutral |
| BGC823 | chr17 | 1129101  | 1133300  | 0.326897   | Copy neutral |
| BGC823 | chr17 | 1133301  | 1362900  | -0.442503  | Copy neutral |
| BGC823 | chr17 | 1362901  | 2545200  | -0.238503  | Copy neutral |
| BGC823 | chr17 | 2545201  | 2563400  | -1.5351    | Copy loss    |
| BGC823 | chr17 | 2563401  | 2720200  | -0.256303  | Copy neutral |
| BGC823 | chr17 | 2720201  | 2721600  | -6.0568    | Copy loss    |
| BGC823 | chr17 | 2721601  | 2754500  | -0.598003  | Copy loss    |
| BGC823 | chr17 | 2754501  | 2954000  | -0.222403  | Copy neutral |
| BGC823 | chr17 | 2954001  | 2977800  | 0.569197   | Copy gain    |
| BGC823 | chr17 | 2977801  | 3013500  | 0.259797   | Copy neutral |
| BGC823 | chr17 | 3013501  | 3372600  | 0.0503974  | Copy neutral |
| BGC823 | chr17 | 3372601  | 3523800  | -0.228803  | Copy neutral |
| BGC823 | chr17 | 3523801  | 3525200  | -4.8577    | Copy loss    |
| BGC823 | chr17 | 3525201  | 4246200  | -0.155803  | Copy neutral |
| BGC823 | chr17 | 4246201  | 4341400  | -0.536003  | Copy loss    |
| BGC823 | chr17 | 4341401  | 5021100  | -0.223203  | Copy neutral |
| BGC823 | chr17 | 5021101  | 5091100  | 0.0458974  | Copy neutral |
| BGC823 | chr17 | 5091101  | 5142900  | -0.277103  | Copy neutral |
| BGC823 | chr17 | 5142901  | 5145700  | 0.641197   | Copy gain    |
| BGC823 | chr17 | 5145701  | 5185600  | -0.522503  | Copy loss    |
| BGC823 | chr17 | 5185601  | 5279400  | -0.192003  | Copy neutral |
| BGC823 | chr17 | 5279401  | 6867700  | -0.0684026 | Copy neutral |
| BGC823 | chr17 | 6867701  | 7787500  | -0.245403  | Copy neutral |
| BGC823 | chr17 | 7787501  | 7788900  | -5.7675    | Copy loss    |
| BGC823 | chr17 | 7788901  | 14189700 | -0.142003  | Copy neutral |
| BGC823 | chr17 | 14189701 | 14191100 | -6.2815    | Copy loss    |
| BGC823 | chr17 | 14191101 | 14487900 | -0.203703  | Copy neutral |
| BGC823 | chr17 | 14487901 | 15702400 | -0.0431026 | Copy neutral |
| BGC823 | chr17 | 15702401 | 15704150 | -2.0328    | Copy loss    |
| BGC823 | chr17 | 15704151 | 15788500 | 0.137197   | Copy neutral |
| BGC823 | chr17 | 15788501 | 15904000 | -0.193903  | Copy neutral |
| BGC823 | chr17 | 15904001 | 16065000 | -0.0202026 | Copy neutral |
| BGC823 | chr17 | 16065001 | 16070600 | 0.652097   | Copy gain    |
| BGC823 | chr17 | 16070601 | 16099300 | -0.0916026 | Copy neutral |
| BGC823 | chr17 | 16099301 | 16328900 | -0.333203  | Copy neutral |
| BGC823 | chr17 | 16328901 | 16656150 | -0.0345026 | Copy neutral |
| BGC823 | chr17 | 16656151 | 16710750 | 1.1481     | Copy gain    |
| BGC823 | chr17 | 16710751 | 18418050 | -0.0847026 | Copy neutral |
| BGC823 | chr17 | 18418051 | 18429600 | -6.8248    | Copy loss    |
| BGC823 | chr17 | 18429601 | 18448150 | -3.1771    | Copy loss    |
| BGC823 | chr17 | 18448151 | 18453750 | -7.525     | Copy loss    |
| BGC823 | chr17 | 18453751 | 18464600 | -1.9361    | Copy loss    |
| BGC823 | chr17 | 18464601 | 18584650 | 0.222997   | Copy neutral |
| BGC823 | chr17 | 18584651 | 18732350 | -0.0692026 | Copy neutral |

|        |       |          |          |            |              |
|--------|-------|----------|----------|------------|--------------|
| BGC823 | chr17 | 18732351 | 18746350 | -2.1585    | Copy loss    |
| BGC823 | chr17 | 18746351 | 20228600 | -0.132903  | Copy neutral |
| BGC823 | chr17 | 20228601 | 20611500 | 0.0380974  | Copy neutral |
| BGC823 | chr17 | 20611501 | 20614300 | -7.0364    | Copy loss    |
| BGC823 | chr17 | 20614301 | 20760600 | -0.283303  | Copy neutral |
| BGC823 | chr17 | 20760601 | 20792800 | 0.437097   | Copy neutral |
| BGC823 | chr17 | 20792801 | 20941900 | -0.0814026 | Copy neutral |
| BGC823 | chr17 | 20941901 | 20965000 | -0.407503  | Copy neutral |
| BGC823 | chr17 | 20965001 | 20971300 | -1.1134    | Copy loss    |
| BGC823 | chr17 | 20971301 | 21046900 | -0.325803  | Copy neutral |
| BGC823 | chr17 | 21046901 | 21191800 | -0.145103  | Copy neutral |
| BGC823 | chr17 | 21191801 | 21205800 | 0.596797   | Copy gain    |
| BGC823 | chr17 | 21205801 | 21212800 | 1.0373     | Copy gain    |
| BGC823 | chr17 | 21212801 | 21221900 | 0.496997   | Copy gain    |
| BGC823 | chr17 | 21221901 | 21254100 | 1.3304     | Copy gain    |
| BGC823 | chr17 | 21254101 | 21303100 | -0.0394026 | Copy neutral |
| BGC823 | chr17 | 21303101 | 21353500 | 1.1771     | Copy gain    |
| BGC823 | chr17 | 21353501 | 21506100 | -0.0368026 | Copy neutral |
| BGC823 | chr17 | 21506101 | 21513800 | 0.891997   | Copy gain    |
| BGC823 | chr17 | 21513801 | 21517300 | -0.109403  | Copy neutral |
| BGC823 | chr17 | 21517301 | 21548100 | 0.919297   | Copy gain    |
| BGC823 | chr17 | 21548101 | 21566609 | 1.7833     | Copy gain    |
| BGC823 | chr17 | 21666608 | 21667800 | 1.7833     | Copy gain    |
| BGC823 | chr17 | 21667801 | 21686000 | 0.824797   | Copy gain    |
| BGC823 | chr17 | 21686001 | 21723800 | 0.0233974  | Copy neutral |
| BGC823 | chr17 | 21723801 | 21758800 | -0.617303  | Copy loss    |
| BGC823 | chr17 | 21758801 | 21829500 | -0.110603  | Copy neutral |
| BGC823 | chr17 | 21829501 | 21879200 | -0.402203  | Copy neutral |
| BGC823 | chr17 | 21879201 | 21903000 | 0.0197974  | Copy neutral |
| BGC823 | chr17 | 21903001 | 21907550 | 3.1261     | Copy gain    |
| BGC823 | chr17 | 21907551 | 21952000 | -0.105803  | Copy neutral |
| BGC823 | chr17 | 21952001 | 21953400 | -1.5319    | Copy loss    |
| BGC823 | chr17 | 21953401 | 21973700 | -0.125803  | Copy neutral |
| BGC823 | chr17 | 21973701 | 21976500 | -1.0122    | Copy loss    |
| BGC823 | chr17 | 21976501 | 22206800 | -0.0612026 | Copy neutral |
| BGC823 | chr17 | 22206801 | 22218000 | 0.463097   | Copy gain    |
| BGC823 | chr17 | 22218001 | 22244600 | -0.0925026 | Copy neutral |
| BGC823 | chr17 | 22244601 | 22262100 | 6.528      | Copy gain    |
| BGC823 | chr17 | 22262101 | 22263007 | 3.4681     | Copy gain    |
| BGC823 | chr17 | 25263006 | 25267900 | 3.4681     | Copy gain    |
| BGC823 | chr17 | 25267901 | 25307100 | 1.8827     | Copy gain    |
| BGC823 | chr17 | 25307101 | 25340350 | 0.680297   | Copy gain    |
| BGC823 | chr17 | 25340351 | 26973800 | -0.0403026 | Copy neutral |
| BGC823 | chr17 | 26973801 | 30846900 | -0.149203  | Copy neutral |
| BGC823 | chr17 | 30846901 | 30929500 | 0.428597   | Copy neutral |
| BGC823 | chr17 | 30929501 | 32872700 | -0.0528026 | Copy neutral |
| BGC823 | chr17 | 32872701 | 32874100 | -5.343     | Copy loss    |
| BGC823 | chr17 | 32874101 | 34507550 | -0.0606026 | Copy neutral |
| BGC823 | chr17 | 34507551 | 34576150 | -7.6164    | Copy loss    |
| BGC823 | chr17 | 34576151 | 34627250 | -1.7696    | Copy loss    |
| BGC823 | chr17 | 34627251 | 34675849 | -0.204103  | Copy neutral |
| BGC823 | chr17 | 34725848 | 34941200 | -0.204103  | Copy neutral |

|        |       |          |          |            |              |
|--------|-------|----------|----------|------------|--------------|
| BGC823 | chr17 | 34941201 | 35585900 | -0.0893026 | Copy neutral |
| BGC823 | chr17 | 35585901 | 35587300 | -1.5368    | Copy loss    |
| BGC823 | chr17 | 35587301 | 35647500 | -0.0134026 | Copy neutral |
| BGC823 | chr17 | 35647501 | 35756000 | -0.336003  | Copy neutral |
| BGC823 | chr17 | 35756001 | 35758800 | -8.1794    | Copy loss    |
| BGC823 | chr17 | 35758801 | 36285550 | -0.148703  | Copy neutral |
| BGC823 | chr17 | 36285551 | 36350300 | 2.4944     | Copy gain    |
| BGC823 | chr17 | 36350301 | 36401400 | 1.4479     | Copy gain    |
| BGC823 | chr17 | 36401401 | 36406300 | 2.6552     | Copy gain    |
| BGC823 | chr17 | 36406301 | 38586100 | -0.200403  | Copy neutral |
| BGC823 | chr17 | 38586101 | 39816700 | 0.0338974  | Copy neutral |
| BGC823 | chr17 | 39816701 | 41379800 | -0.197803  | Copy neutral |
| BGC823 | chr17 | 41379801 | 41382600 | 1.4893     | Copy gain    |
| BGC823 | chr17 | 41382601 | 41399400 | -0.463003  | Copy loss    |
| BGC823 | chr17 | 41399401 | 41401500 | 2.8221     | Copy gain    |
| BGC823 | chr17 | 41401501 | 41465200 | 0.0199974  | Copy neutral |
| BGC823 | chr17 | 41465201 | 41517000 | -0.282103  | Copy neutral |
| BGC823 | chr17 | 41517001 | 41518400 | -7.5681    | Copy loss    |
| BGC823 | chr17 | 41518401 | 42202300 | -0.160303  | Copy neutral |
| BGC823 | chr17 | 42202301 | 42207900 | -1.1259    | Copy loss    |
| BGC823 | chr17 | 42207901 | 42296100 | -0.190603  | Copy neutral |
| BGC823 | chr17 | 42296101 | 42297500 | -8.3671    | Copy loss    |
| BGC823 | chr17 | 42297501 | 42960400 | -0.196103  | Copy neutral |
| BGC823 | chr17 | 42960401 | 44164400 | 0.496097   | Copy gain    |
| BGC823 | chr17 | 44164401 | 44805600 | 0.901897   | Copy gain    |
| BGC823 | chr17 | 44805601 | 45212300 | 0.533597   | Copy gain    |
| BGC823 | chr17 | 45212301 | 45214400 | 2.8287     | Copy gain    |
| BGC823 | chr17 | 45214401 | 45538500 | 0.641997   | Copy gain    |
| BGC823 | chr17 | 45538501 | 45616200 | 0.271697   | Copy neutral |
| BGC823 | chr17 | 45616201 | 46154500 | 0.529997   | Copy gain    |
| BGC823 | chr17 | 46154501 | 46195100 | 0.159297   | Copy neutral |
| BGC823 | chr17 | 46195101 | 46234300 | 0.528997   | Copy gain    |
| BGC823 | chr17 | 46234301 | 46238500 | -0.211203  | Copy neutral |
| BGC823 | chr17 | 46238501 | 46594100 | 0.585297   | Copy gain    |
| BGC823 | chr17 | 46594101 | 46739700 | 0.182497   | Copy neutral |
| BGC823 | chr17 | 46739701 | 47014800 | 0.418997   | Copy neutral |
| BGC823 | chr17 | 47014801 | 47077100 | 0.178997   | Copy neutral |
| BGC823 | chr17 | 47077101 | 47407500 | 0.448497   | Copy neutral |
| BGC823 | chr17 | 47407501 | 47423600 | 0.130797   | Copy neutral |
| BGC823 | chr17 | 47423601 | 49182350 | 0.521597   | Copy gain    |
| BGC823 | chr17 | 49182351 | 49203000 | -0.142903  | Copy neutral |
| BGC823 | chr17 | 49203001 | 49352800 | 0.451597   | Copy gain    |
| BGC823 | chr17 | 49352801 | 50211700 | 0.614497   | Copy gain    |
| BGC823 | chr17 | 50211701 | 53144700 | 0.529797   | Copy gain    |
| BGC823 | chr17 | 53144701 | 53274200 | 0.685497   | Copy gain    |
| BGC823 | chr17 | 53274201 | 53341400 | 0.566097   | Copy gain    |
| BGC823 | chr17 | 53341401 | 53343500 | -0.636803  | Copy loss    |
| BGC823 | chr17 | 53343501 | 53622800 | 0.539897   | Copy gain    |
| BGC823 | chr17 | 53622801 | 54670000 | 0.651697   | Copy gain    |
| BGC823 | chr17 | 54670001 | 54675600 | -0.313603  | Copy neutral |
| BGC823 | chr17 | 54675601 | 54889800 | 0.659297   | Copy gain    |
| BGC823 | chr17 | 54889801 | 55014400 | 0.519497   | Copy gain    |

|        |       |          |          |            |              |
|--------|-------|----------|----------|------------|--------------|
| BGC823 | chr17 | 55014401 | 55091400 | -0.144003  | Copy neutral |
| BGC823 | chr17 | 55091401 | 55208300 | 0.467297   | Copy gain    |
| BGC823 | chr17 | 55208301 | 55209700 | -4.7502    | Copy loss    |
| BGC823 | chr17 | 55209701 | 56665700 | 0.528997   | Copy gain    |
| BGC823 | chr17 | 56665701 | 56915600 | 0.341897   | Copy neutral |
| BGC823 | chr17 | 56915601 | 56921200 | 0.569497   | Copy gain    |
| BGC823 | chr17 | 56921201 | 56938000 | 0.853897   | Copy gain    |
| BGC823 | chr17 | 56938001 | 56954100 | 0.523597   | Copy gain    |
| BGC823 | chr17 | 56954101 | 56957600 | -0.115503  | Copy neutral |
| BGC823 | chr17 | 56957601 | 56998900 | 0.577897   | Copy gain    |
| BGC823 | chr17 | 56998901 | 57197000 | 0.382597   | Copy neutral |
| BGC823 | chr17 | 57197001 | 57404200 | 0.208897   | Copy neutral |
| BGC823 | chr17 | 57404201 | 57864800 | 0.438097   | Copy neutral |
| BGC823 | chr17 | 57864801 | 58005500 | 0.237397   | Copy neutral |
| BGC823 | chr17 | 58005501 | 58214800 | 0.633797   | Copy gain    |
| BGC823 | chr17 | 58214801 | 58247700 | 0.249297   | Copy neutral |
| BGC823 | chr17 | 58247701 | 58412200 | 0.546497   | Copy gain    |
| BGC823 | chr17 | 58412201 | 58413600 | -8.3671    | Copy loss    |
| BGC823 | chr17 | 58413601 | 59788400 | 0.478597   | Copy gain    |
| BGC823 | chr17 | 59788401 | 60071900 | -0.150103  | Copy neutral |
| BGC823 | chr17 | 60071901 | 62410761 | 0.508297   | Copy gain    |
| BGC823 | chr17 | 62460760 | 64287300 | 0.508297   | Copy gain    |
| BGC823 | chr17 | 64287301 | 64288700 | -8.3671    | Copy loss    |
| BGC823 | chr17 | 64288701 | 64794100 | 0.559397   | Copy gain    |
| BGC823 | chr17 | 64794101 | 64795500 | 2.3074     | Copy gain    |
| BGC823 | chr17 | 64795501 | 65221800 | 0.517797   | Copy gain    |
| BGC823 | chr17 | 65221801 | 66297000 | 0.346697   | Copy neutral |
| BGC823 | chr17 | 66297001 | 69604850 | 0.575597   | Copy gain    |
| BGC823 | chr17 | 69604851 | 69606600 | -8.3671    | Copy loss    |
| BGC823 | chr17 | 69606601 | 70112700 | 0.530097   | Copy gain    |
| BGC823 | chr17 | 70112701 | 70121800 | -0.142703  | Copy neutral |
| BGC823 | chr17 | 70121801 | 70632800 | 0.538697   | Copy gain    |
| BGC823 | chr17 | 70632801 | 70813400 | -0.0785026 | Copy neutral |
| BGC823 | chr17 | 70813401 | 77546462 | 0.410497   | Copy neutral |
| BGC823 | chr17 | 77596461 | 79659300 | 0.410497   | Copy neutral |
| BGC823 | chr17 | 79659301 | 79709050 | -0.205803  | Copy neutral |
| BGC823 | chr17 | 79759049 | 81036900 | -0.205803  | Copy neutral |
| BGC823 | chr17 | 81036901 | 81039000 | -8.3671    | Copy loss    |
| BGC823 | chr17 | 81039001 | 81195210 | -0.0465026 | Copy neutral |
| BGC823 | chr18 | 10000    | 106400   | 0.753597   | Copy gain    |
| BGC823 | chr18 | 106401   | 112350   | 7.772      | Copy gain    |
| BGC823 | chr18 | 112351   | 911400   | 0.438597   | Copy neutral |
| BGC823 | chr18 | 911401   | 1737400  | 0.597197   | Copy gain    |
| BGC823 | chr18 | 1737401  | 1785000  | 0.481797   | Copy gain    |
| BGC823 | chr18 | 1785001  | 3348800  | 0.976197   | Copy gain    |
| BGC823 | chr18 | 3348801  | 3660300  | 0.838197   | Copy gain    |
| BGC823 | chr18 | 3660301  | 3782800  | 0.984197   | Copy gain    |
| BGC823 | chr18 | 3782801  | 3952900  | 1.104      | Copy gain    |
| BGC823 | chr18 | 3952901  | 5324900  | 0.963697   | Copy gain    |
| BGC823 | chr18 | 5324901  | 5326300  | -5.532     | Copy loss    |
| BGC823 | chr18 | 5326301  | 6641600  | 0.993197   | Copy gain    |
| BGC823 | chr18 | 6641601  | 6907600  | 0.635397   | Copy gain    |

|        |       |          |          |            |              |
|--------|-------|----------|----------|------------|--------------|
| BGC823 | chr18 | 6907601  | 7578900  | 0.462097   | Copy gain    |
| BGC823 | chr18 | 7578901  | 8348900  | 0.623197   | Copy gain    |
| BGC823 | chr18 | 8348901  | 8431500  | 0.971997   | Copy gain    |
| BGC823 | chr18 | 8431501  | 8560300  | 0.556997   | Copy gain    |
| BGC823 | chr18 | 8560301  | 8705200  | -0.0919026 | Copy neutral |
| BGC823 | chr18 | 8705201  | 8706600  | -8.3671    | Copy loss    |
| BGC823 | chr18 | 8706601  | 15159550 | -0.0381026 | Copy neutral |
| BGC823 | chr18 | 15159551 | 15182300 | 1.2116     | Copy gain    |
| BGC823 | chr18 | 15182301 | 15240400 | 0.570097   | Copy gain    |
| BGC823 | chr18 | 15240401 | 15293600 | 0.228297   | Copy neutral |
| BGC823 | chr18 | 15293601 | 15328600 | 0.485397   | Copy gain    |
| BGC823 | chr18 | 15328601 | 15379000 | 0.0943974  | Copy neutral |
| BGC823 | chr18 | 15379001 | 15395800 | 1.277      | Copy gain    |
| BGC823 | chr18 | 15395801 | 15402800 | 0.419397   | Copy neutral |
| BGC823 | chr18 | 15402801 | 15410899 | 1.6069     | Copy gain    |
| BGC823 | chr18 | 18510898 | 18520600 | 6.1095     | Copy gain    |
| BGC823 | chr18 | 18520601 | 18699800 | 0.0654974  | Copy neutral |
| BGC823 | chr18 | 18699801 | 18837700 | -0.134103  | Copy neutral |
| BGC823 | chr18 | 18837701 | 18926600 | 0.00839737 | Copy neutral |
| BGC823 | chr18 | 18926601 | 19367600 | -0.199103  | Copy neutral |
| BGC823 | chr18 | 19367601 | 19471900 | 0.0242974  | Copy neutral |
| BGC823 | chr18 | 19471901 | 19810700 | -0.211003  | Copy neutral |
| BGC823 | chr18 | 19810701 | 19857600 | -0.0693026 | Copy neutral |
| BGC823 | chr18 | 19857601 | 20507200 | 0.0980974  | Copy neutral |
| BGC823 | chr18 | 20507201 | 25435200 | -0.0485026 | Copy neutral |
| BGC823 | chr18 | 25435201 | 25436600 | -8.3671    | Copy loss    |
| BGC823 | chr18 | 25436601 | 27174700 | -0.0126026 | Copy neutral |
| BGC823 | chr18 | 27174701 | 27176100 | -8.3671    | Copy loss    |
| BGC823 | chr18 | 27176101 | 33160400 | -0.0527026 | Copy neutral |
| BGC823 | chr18 | 33160401 | 33161800 | -5.0052    | Copy loss    |
| BGC823 | chr18 | 33161801 | 33394900 | 0.116497   | Copy neutral |
| BGC823 | chr18 | 33394901 | 34197100 | -0.0430026 | Copy neutral |
| BGC823 | chr18 | 34197101 | 34200600 | -1.1234    | Copy loss    |
| BGC823 | chr18 | 34200601 | 34423200 | -0.0370026 | Copy neutral |
| BGC823 | chr18 | 34423201 | 35604800 | 0.0444974  | Copy neutral |
| BGC823 | chr18 | 35604801 | 38864700 | -0.0401026 | Copy neutral |
| BGC823 | chr18 | 38864701 | 38868200 | -8.3671    | Copy loss    |
| BGC823 | chr18 | 38868201 | 39351900 | -0.0709026 | Copy neutral |
| BGC823 | chr18 | 39351901 | 39362400 | -1.1791    | Copy loss    |
| BGC823 | chr18 | 39362401 | 41940500 | -0.0177026 | Copy neutral |
| BGC823 | chr18 | 41940501 | 41941900 | -8.3671    | Copy loss    |
| BGC823 | chr18 | 41941901 | 49196700 | -0.0151026 | Copy neutral |
| BGC823 | chr18 | 49196701 | 49198800 | -8.1169    | Copy loss    |
| BGC823 | chr18 | 49198801 | 52059137 | -0.0388026 | Copy neutral |
| BGC823 | chr18 | 52209136 | 64219400 | -0.0388026 | Copy neutral |
| BGC823 | chr18 | 64219401 | 64220800 | -5.1644    | Copy loss    |
| BGC823 | chr18 | 64220801 | 65390500 | 0.0471974  | Copy neutral |
| BGC823 | chr18 | 65390501 | 65395400 | -1.2329    | Copy loss    |
| BGC823 | chr18 | 65395401 | 65739100 | 0.0650974  | Copy neutral |
| BGC823 | chr18 | 65739101 | 66992800 | -0.909703  | Copy loss    |
| BGC823 | chr18 | 66992801 | 66994200 | -5.9501    | Copy loss    |
| BGC823 | chr18 | 66994201 | 71402100 | -0.938103  | Copy loss    |

|        |       |          |          |            |              |
|--------|-------|----------|----------|------------|--------------|
| BGC823 | chr18 | 71402101 | 72283354 | -1.1677    | Copy loss    |
| BGC823 | chr18 | 72333353 | 75721821 | -1.1677    | Copy loss    |
| BGC823 | chr18 | 75771820 | 76738900 | -1.1677    | Copy loss    |
| BGC823 | chr18 | 76738901 | 76740300 | -8.3671    | Copy loss    |
| BGC823 | chr18 | 76740301 | 78017249 | -1.0918    | Copy loss    |
| BGC823 | chr18 | 78077248 | 78077248 | -1.0918    | Copy loss    |
| BGC823 | chr19 | 60000    | 1196650  | -0.292703  | Copy neutral |
| BGC823 | chr19 | 1196651  | 1219400  | -8.3671    | Copy loss    |
| BGC823 | chr19 | 1219401  | 4560500  | -0.346503  | Copy neutral |
| BGC823 | chr19 | 4560501  | 4562600  | -7.6164    | Copy loss    |
| BGC823 | chr19 | 4562601  | 6649300  | -0.285403  | Copy neutral |
| BGC823 | chr19 | 6649301  | 7346005  | 0.330597   | Copy neutral |
| BGC823 | chr19 | 7396004  | 8687199  | 0.330597   | Copy neutral |
| BGC823 | chr19 | 8737198  | 9516500  | 0.330597   | Copy neutral |
| BGC823 | chr19 | 9516501  | 9561300  | -0.229103  | Copy neutral |
| BGC823 | chr19 | 9561301  | 9592800  | 0.106897   | Copy neutral |
| BGC823 | chr19 | 9592801  | 9692900  | -0.175603  | Copy neutral |
| BGC823 | chr19 | 9692901  | 9698500  | -0.885803  | Copy loss    |
| BGC823 | chr19 | 9698501  | 9786000  | -0.214803  | Copy neutral |
| BGC823 | chr19 | 9786001  | 9787400  | -2.0375    | Copy loss    |
| BGC823 | chr19 | 9787401  | 9887500  | -0.0875026 | Copy neutral |
| BGC823 | chr19 | 9887501  | 9938600  | -0.500703  | Copy loss    |
| BGC823 | chr19 | 9938601  | 10322900 | -0.245803  | Copy neutral |
| BGC823 | chr19 | 10322901 | 10614100 | -0.402003  | Copy neutral |
| BGC823 | chr19 | 10614101 | 10619700 | -1.9955    | Copy loss    |
| BGC823 | chr19 | 10619701 | 11757900 | -0.336403  | Copy neutral |
| BGC823 | chr19 | 11757901 | 12093900 | -0.143103  | Copy neutral |
| BGC823 | chr19 | 12093901 | 12425000 | -0.341703  | Copy neutral |
| BGC823 | chr19 | 12425001 | 12590200 | -0.108303  | Copy neutral |
| BGC823 | chr19 | 12590201 | 12607000 | -0.537803  | Copy loss    |
| BGC823 | chr19 | 12607001 | 12611200 | -8.1169    | Copy loss    |
| BGC823 | chr19 | 12611201 | 12671400 | -0.344503  | Copy neutral |
| BGC823 | chr19 | 12671401 | 12672800 | -6.0804    | Copy loss    |
| BGC823 | chr19 | 12672801 | 12898900 | -0.335803  | Copy neutral |
| BGC823 | chr19 | 12898901 | 16522800 | 0.754597   | Copy gain    |
| BGC823 | chr19 | 16522801 | 20523416 | 0.328297   | Copy neutral |
| BGC823 | chr19 | 20573415 | 21046900 | 0.328297   | Copy neutral |
| BGC823 | chr19 | 21046901 | 21100100 | 1.1775     | Copy gain    |
| BGC823 | chr19 | 21100101 | 21641200 | 0.359697   | Copy neutral |
| BGC823 | chr19 | 21641201 | 21660800 | -0.138203  | Copy neutral |
| BGC823 | chr19 | 21660801 | 21670600 | 0.252197   | Copy neutral |
| BGC823 | chr19 | 21670601 | 21680400 | 0.948497   | Copy gain    |
| BGC823 | chr19 | 21680401 | 22041600 | 0.316497   | Copy neutral |
| BGC823 | chr19 | 22041601 | 22056300 | 0.647597   | Copy gain    |
| BGC823 | chr19 | 22056301 | 22062600 | 1.0896     | Copy gain    |
| BGC823 | chr19 | 22062601 | 22073100 | 0.400897   | Copy neutral |
| BGC823 | chr19 | 22073101 | 22122800 | 0.766297   | Copy gain    |
| BGC823 | chr19 | 22122801 | 22190000 | 0.493797   | Copy gain    |
| BGC823 | chr19 | 22190001 | 22196300 | -0.490603  | Copy loss    |
| BGC823 | chr19 | 22196301 | 22208900 | 0.393097   | Copy neutral |
| BGC823 | chr19 | 22208901 | 22234100 | 0.778497   | Copy gain    |
| BGC823 | chr19 | 22234101 | 22239700 | -0.542603  | Copy loss    |

|        |       |          |          |            |              |
|--------|-------|----------|----------|------------|--------------|
| BGC823 | chr19 | 22239701 | 22505700 | 0.400597   | Copy neutral |
| BGC823 | chr19 | 22505701 | 22535100 | 0.828997   | Copy gain    |
| BGC823 | chr19 | 22535101 | 22559600 | 0.268797   | Copy neutral |
| BGC823 | chr19 | 22559601 | 22583400 | 0.621097   | Copy gain    |
| BGC823 | chr19 | 22583401 | 22595300 | 0.289297   | Copy neutral |
| BGC823 | chr19 | 22595301 | 22633100 | 0.0310974  | Copy neutral |
| BGC823 | chr19 | 22633101 | 22896300 | 0.369397   | Copy neutral |
| BGC823 | chr19 | 22896301 | 22925700 | 0.788797   | Copy gain    |
| BGC823 | chr19 | 22925701 | 22991500 | 0.232797   | Copy neutral |
| BGC823 | chr19 | 22991501 | 23009700 | 0.818397   | Copy gain    |
| BGC823 | chr19 | 23009701 | 23018100 | -0.178903  | Copy neutral |
| BGC823 | chr19 | 23018101 | 23095100 | 0.235997   | Copy neutral |
| BGC823 | chr19 | 23095101 | 23119600 | 0.875997   | Copy gain    |
| BGC823 | chr19 | 23119601 | 23132900 | 0.378897   | Copy neutral |
| BGC823 | chr19 | 23132901 | 23137100 | 0.882797   | Copy gain    |
| BGC823 | chr19 | 23137101 | 23140600 | 0.306497   | Copy neutral |
| BGC823 | chr19 | 23140601 | 23142700 | -1.5802    | Copy loss    |
| BGC823 | chr19 | 23142701 | 23181900 | 0.489897   | Copy gain    |
| BGC823 | chr19 | 23181901 | 23193100 | -0.0126026 | Copy neutral |
| BGC823 | chr19 | 23193101 | 23214100 | 0.737197   | Copy gain    |
| BGC823 | chr19 | 23214101 | 23227400 | 0.337297   | Copy neutral |
| BGC823 | chr19 | 23227401 | 23252600 | 0.833497   | Copy gain    |
| BGC823 | chr19 | 23252601 | 23277800 | 0.232797   | Copy neutral |
| BGC823 | chr19 | 23277801 | 23284800 | 0.941197   | Copy gain    |
| BGC823 | chr19 | 23284801 | 23373000 | 0.370297   | Copy neutral |
| BGC823 | chr19 | 23373001 | 23387000 | -0.158903  | Copy neutral |
| BGC823 | chr19 | 23387001 | 23437400 | 0.242997   | Copy neutral |
| BGC823 | chr19 | 23437401 | 23447200 | 0.824797   | Copy gain    |
| BGC823 | chr19 | 23447201 | 23474500 | 0.114897   | Copy neutral |
| BGC823 | chr19 | 23474501 | 23489900 | 0.676797   | Copy gain    |
| BGC823 | chr19 | 23489901 | 23505300 | 0.998097   | Copy gain    |
| BGC823 | chr19 | 23505301 | 23545200 | 0.571397   | Copy gain    |
| BGC823 | chr19 | 23545201 | 23583000 | 0.313997   | Copy neutral |
| BGC823 | chr19 | 23583001 | 23590000 | 0.937697   | Copy gain    |
| BGC823 | chr19 | 23590001 | 23612400 | 0.196397   | Copy neutral |
| BGC823 | chr19 | 23612401 | 23631300 | 0.623697   | Copy gain    |
| BGC823 | chr19 | 23631301 | 23647400 | 0.898897   | Copy gain    |
| BGC823 | chr19 | 23647401 | 23655800 | 0.389697   | Copy neutral |
| BGC823 | chr19 | 23655801 | 23678900 | 0.673997   | Copy gain    |
| BGC823 | chr19 | 23678901 | 23686600 | 0.474797   | Copy gain    |
| BGC823 | chr19 | 23686601 | 23695700 | 0.105397   | Copy neutral |
| BGC823 | chr19 | 23695701 | 23748900 | 0.711297   | Copy gain    |
| BGC823 | chr19 | 23748901 | 23804900 | 0.459997   | Copy gain    |
| BGC823 | chr19 | 23804901 | 23951900 | 0.240097   | Copy neutral |
| BGC823 | chr19 | 23951901 | 24191300 | 0.546397   | Copy gain    |
| BGC823 | chr19 | 24191301 | 24231200 | 0.225397   | Copy neutral |
| BGC823 | chr19 | 24231201 | 24267600 | 0.666597   | Copy gain    |
| BGC823 | chr19 | 24267601 | 24275300 | -0.333403  | Copy neutral |
| BGC823 | chr19 | 24275301 | 24362100 | 0.496797   | Copy gain    |
| BGC823 | chr19 | 24362101 | 24385200 | 0.809397   | Copy gain    |
| BGC823 | chr19 | 24385201 | 24416000 | 0.371797   | Copy neutral |
| BGC823 | chr19 | 24416001 | 24419500 | 0.902197   | Copy gain    |



|        |       |          |          |            |              |
|--------|-------|----------|----------|------------|--------------|
| BGC823 | chr19 | 24419501 | 24446800 | 0.350797   | Copy neutral |
| BGC823 | chr19 | 24446801 | 24450300 | 0.845297   | Copy gain    |
| BGC823 | chr19 | 24450301 | 24462900 | 0.269397   | Copy neutral |
| BGC823 | chr19 | 24462901 | 24466400 | 0.775897   | Copy gain    |
| BGC823 | chr19 | 24466401 | 24513300 | 0.334697   | Copy neutral |
| BGC823 | chr19 | 24513301 | 24631783 | 1.2422     | Copy gain    |
| BGC823 | chr19 | 27731782 | 27740300 | 7.1372     | Copy gain    |
| BGC823 | chr19 | 27740301 | 27828500 | 0.258197   | Copy neutral |
| BGC823 | chr19 | 27828501 | 27832000 | 2.1274     | Copy gain    |
| BGC823 | chr19 | 27832001 | 27836200 | 0.150597   | Copy neutral |
| BGC823 | chr19 | 27836201 | 27871200 | 2.3141     | Copy gain    |
| BGC823 | chr19 | 27871201 | 27873300 | -0.210803  | Copy neutral |
| BGC823 | chr19 | 27873301 | 27890100 | 2.3886     | Copy gain    |
| BGC823 | chr19 | 27890101 | 27892200 | 0.599697   | Copy gain    |
| BGC823 | chr19 | 27892201 | 27920200 | -0.0704026 | Copy neutral |
| BGC823 | chr19 | 27920201 | 27941200 | -0.345003  | Copy neutral |
| BGC823 | chr19 | 27941201 | 27957300 | -0.152103  | Copy neutral |
| BGC823 | chr19 | 27957301 | 27960100 | -7.5008    | Copy loss    |
| BGC823 | chr19 | 27960101 | 36957900 | -0.169203  | Copy neutral |
| BGC823 | chr19 | 36957901 | 36960000 | -8.3671    | Copy loss    |
| BGC823 | chr19 | 36960001 | 40042800 | -0.234303  | Copy neutral |
| BGC823 | chr19 | 40042801 | 43086400 | -0.0973026 | Copy neutral |
| BGC823 | chr19 | 43086401 | 43828400 | 0.185497   | Copy neutral |
| BGC823 | chr19 | 43828401 | 43833300 | 2.3099     | Copy gain    |
| BGC823 | chr19 | 43833301 | 43883700 | 0.120797   | Copy neutral |
| BGC823 | chr19 | 43883701 | 44230900 | -0.210103  | Copy neutral |
| BGC823 | chr19 | 44230901 | 44914800 | 0.0174974  | Copy neutral |
| BGC823 | chr19 | 44914801 | 44916200 | 2.2972     | Copy gain    |
| BGC823 | chr19 | 44916201 | 45096100 | 0.0588974  | Copy neutral |
| BGC823 | chr19 | 45096101 | 45118500 | -0.141103  | Copy neutral |
| BGC823 | chr19 | 45118501 | 45120600 | -1.1281    | Copy loss    |
| BGC823 | chr19 | 45120601 | 45146500 | -0.0307026 | Copy neutral |
| BGC823 | chr19 | 45146501 | 46540900 | -0.289503  | Copy neutral |
| BGC823 | chr19 | 46540901 | 46756500 | 0.0778974  | Copy neutral |
| BGC823 | chr19 | 46756501 | 51406600 | -0.268503  | Copy neutral |
| BGC823 | chr19 | 51406601 | 51408000 | -7.9917    | Copy loss    |
| BGC823 | chr19 | 51408001 | 51555000 | -0.274803  | Copy neutral |
| BGC823 | chr19 | 51555001 | 52133200 | -0.0984026 | Copy neutral |
| BGC823 | chr19 | 52133201 | 52148600 | -8.3314    | Copy loss    |
| BGC823 | chr19 | 52148601 | 52164700 | -0.392703  | Copy neutral |
| BGC823 | chr19 | 52164701 | 53496100 | -0.156103  | Copy neutral |
| BGC823 | chr19 | 53496101 | 53501000 | -1.3188    | Copy loss    |
| BGC823 | chr19 | 53501001 | 54064500 | -0.124203  | Copy neutral |
| BGC823 | chr19 | 54064501 | 54555200 | -0.391703  | Copy neutral |
| BGC823 | chr19 | 54555201 | 54560100 | -7.8276    | Copy loss    |
| BGC823 | chr19 | 54560101 | 55262200 | -0.186003  | Copy neutral |
| BGC823 | chr19 | 55262201 | 55269900 | -2.2521    | Copy loss    |
| BGC823 | chr19 | 55269901 | 55275500 | -0.620803  | Copy loss    |
| BGC823 | chr19 | 55275501 | 55281100 | -5.0624    | Copy loss    |
| BGC823 | chr19 | 55281101 | 55301400 | 0.678697   | Copy gain    |
| BGC823 | chr19 | 55301401 | 55336400 | 0.101897   | Copy neutral |
| BGC823 | chr19 | 55336401 | 55339900 | 0.653697   | Copy gain    |

|        |       |          |          |            |              |
|--------|-------|----------|----------|------------|--------------|
| BGC823 | chr19 | 55339901 | 55349700 | -1.799     | Copy loss    |
| BGC823 | chr19 | 55349701 | 55353200 | -7.512     | Copy loss    |
| BGC823 | chr19 | 55353201 | 55355650 | -1.6489    | Copy loss    |
| BGC823 | chr19 | 55355651 | 55360200 | 1.2786     | Copy gain    |
| BGC823 | chr19 | 55360201 | 55380500 | 0.213397   | Copy neutral |
| BGC823 | chr19 | 55380501 | 55470800 | -0.395603  | Copy neutral |
| BGC823 | chr19 | 55470801 | 55472200 | -5.9421    | Copy loss    |
| BGC823 | chr19 | 55472201 | 59118984 | -0.158303  | Copy neutral |
| BGC823 | chr19 | 59128983 | 59128983 | -0.158303  | Copy neutral |
| BGC823 | chr20 | 60000    | 212100   | 0.127397   | Copy neutral |
| BGC823 | chr20 | 212101   | 984900   | -0.106003  | Copy neutral |
| BGC823 | chr20 | 984901   | 1389500  | 0.0277974  | Copy neutral |
| BGC823 | chr20 | 1389501  | 1390900  | -6.52      | Copy loss    |
| BGC823 | chr20 | 1390901  | 1561700  | 0.117397   | Copy neutral |
| BGC823 | chr20 | 1561701  | 1593900  | -8.0611    | Copy loss    |
| BGC823 | chr20 | 1593901  | 23351300 | -0.0526026 | Copy neutral |
| BGC823 | chr20 | 23351301 | 23387000 | -1.218     | Copy loss    |
| BGC823 | chr20 | 23387001 | 24836000 | -0.0524026 | Copy neutral |
| BGC823 | chr20 | 24836001 | 24929800 | 0.615297   | Copy gain    |
| BGC823 | chr20 | 24929801 | 24943100 | 0.307597   | Copy neutral |
| BGC823 | chr20 | 24943101 | 25012400 | 0.631097   | Copy gain    |
| BGC823 | chr20 | 25012401 | 25041100 | 0.359597   | Copy neutral |
| BGC823 | chr20 | 25041101 | 25061400 | 0.627797   | Copy gain    |
| BGC823 | chr20 | 25061401 | 25066300 | -0.0132026 | Copy neutral |
| BGC823 | chr20 | 25066301 | 25174800 | 0.613797   | Copy gain    |
| BGC823 | chr20 | 25174801 | 25258100 | -0.113003  | Copy neutral |
| BGC823 | chr20 | 25258101 | 25374300 | -1.1055    | Copy loss    |
| BGC823 | chr20 | 25374301 | 25653600 | -0.137703  | Copy neutral |
| BGC823 | chr20 | 25653601 | 25669000 | 0.231197   | Copy neutral |
| BGC823 | chr20 | 25669001 | 25678100 | -0.276603  | Copy neutral |
| BGC823 | chr20 | 25678101 | 25733400 | 0.198897   | Copy neutral |
| BGC823 | chr20 | 25733401 | 25754400 | 1.1493     | Copy gain    |
| BGC823 | chr20 | 25754401 | 25832100 | 0.914897   | Copy gain    |
| BGC823 | chr20 | 25832101 | 25858000 | 0.251997   | Copy neutral |
| BGC823 | chr20 | 25858001 | 25904200 | 0.932797   | Copy gain    |
| BGC823 | chr20 | 25904201 | 25911200 | 1.7005     | Copy gain    |
| BGC823 | chr20 | 25911201 | 25946200 | 0.923297   | Copy gain    |
| BGC823 | chr20 | 25946201 | 26073600 | -0.0407026 | Copy neutral |
| BGC823 | chr20 | 26073601 | 26084800 | 1.2611     | Copy gain    |
| BGC823 | chr20 | 26084801 | 26120500 | 0.156997   | Copy neutral |
| BGC823 | chr20 | 26120501 | 26129600 | 0.776297   | Copy gain    |
| BGC823 | chr20 | 26129601 | 26141500 | 0.333497   | Copy neutral |
| BGC823 | chr20 | 26141501 | 26148500 | 0.866297   | Copy gain    |
| BGC823 | chr20 | 26148501 | 26199600 | 0.0532974  | Copy neutral |
| BGC823 | chr20 | 26199601 | 26213600 | 1.8701     | Copy gain    |
| BGC823 | chr20 | 26213601 | 26238100 | 0.182797   | Copy neutral |
| BGC823 | chr20 | 26238101 | 26255600 | 1.284      | Copy gain    |
| BGC823 | chr20 | 26255601 | 26317200 | 0.214397   | Copy neutral |
| BGC823 | chr20 | 26317201 | 26319570 | 1.7443     | Copy gain    |
| BGC823 | chr20 | 29419569 | 29490300 | 1.7443     | Copy gain    |
| BGC823 | chr20 | 29490301 | 29536150 | 0.836097   | Copy gain    |
| BGC823 | chr20 | 29536151 | 29580600 | 1.4784     | Copy gain    |

|        |       |          |          |          |              |
|--------|-------|----------|----------|----------|--------------|
| BGC823 | chr20 | 29580601 | 29638700 | 2.8284   | Copy gain    |
| BGC823 | chr20 | 29638701 | 29645000 | 1.0646   | Copy gain    |
| BGC823 | chr20 | 29645001 | 29653909 | 3.6267   | Copy gain    |
| BGC823 | chr20 | 29803908 | 29829100 | 1.723    | Copy gain    |
| BGC823 | chr20 | 29829101 | 29833300 | 3.1344   | Copy gain    |
| BGC823 | chr20 | 29833301 | 30014250 | 1.3821   | Copy gain    |
| BGC823 | chr20 | 30014251 | 30253300 | 1.1395   | Copy gain    |
| BGC823 | chr20 | 30253301 | 30272900 | 1.6611   | Copy gain    |
| BGC823 | chr20 | 30272901 | 30309300 | 1.2948   | Copy gain    |
| BGC823 | chr20 | 30309301 | 30364600 | 0.993297 | Copy gain    |
| BGC823 | chr20 | 30364601 | 30454900 | 1.3014   | Copy gain    |
| BGC823 | chr20 | 30454901 | 34897086 | 0.925197 | Copy gain    |
| BGC823 | chr20 | 34947085 | 42272300 | 0.925197 | Copy gain    |
| BGC823 | chr20 | 42272301 | 42274400 | -8.3671  | Copy loss    |
| BGC823 | chr20 | 42274401 | 42327600 | 0.540697 | Copy gain    |
| BGC823 | chr20 | 42327601 | 42935900 | 0.989797 | Copy gain    |
| BGC823 | chr20 | 42935901 | 43017800 | 0.745297 | Copy gain    |
| BGC823 | chr20 | 43017801 | 43196300 | 1.2276   | Copy gain    |
| BGC823 | chr20 | 43196301 | 43748600 | 0.996097 | Copy gain    |
| BGC823 | chr20 | 43748601 | 43843100 | 1.1887   | Copy gain    |
| BGC823 | chr20 | 43843101 | 43920100 | 1.0525   | Copy gain    |
| BGC823 | chr20 | 43920101 | 44069200 | 0.864697 | Copy gain    |
| BGC823 | chr20 | 44069201 | 44277800 | 1.0788   | Copy gain    |
| BGC823 | chr20 | 44277801 | 44359000 | 1.2037   | Copy gain    |
| BGC823 | chr20 | 44359001 | 44661400 | 0.821897 | Copy gain    |
| BGC823 | chr20 | 44661401 | 45791200 | 0.969297 | Copy gain    |
| BGC823 | chr20 | 45791201 | 46229400 | 0.800297 | Copy gain    |
| BGC823 | chr20 | 46229401 | 46522700 | 0.931997 | Copy gain    |
| BGC823 | chr20 | 46522701 | 46524800 | 3.1755   | Copy gain    |
| BGC823 | chr20 | 46524801 | 47131000 | 1.0035   | Copy gain    |
| BGC823 | chr20 | 47131001 | 47133100 | 3.4453   | Copy gain    |
| BGC823 | chr20 | 47133101 | 47637100 | 0.996897 | Copy gain    |
| BGC823 | chr20 | 47637101 | 47849900 | 0.737597 | Copy gain    |
| BGC823 | chr20 | 47849901 | 48318900 | 0.993497 | Copy gain    |
| BGC823 | chr20 | 48318901 | 48542900 | 0.860797 | Copy gain    |
| BGC823 | chr20 | 48542901 | 48698300 | 0.696897 | Copy gain    |
| BGC823 | chr20 | 48698301 | 48769700 | 0.974197 | Copy gain    |
| BGC823 | chr20 | 48769701 | 48809600 | 0.613097 | Copy gain    |
| BGC823 | chr20 | 48809601 | 49200900 | 1.0029   | Copy gain    |
| BGC823 | chr20 | 49200901 | 49407400 | 0.808297 | Copy gain    |
| BGC823 | chr20 | 49407401 | 49413700 | 0.135697 | Copy neutral |
| BGC823 | chr20 | 49413701 | 49495600 | 0.852897 | Copy gain    |
| BGC823 | chr20 | 49495601 | 49644700 | 0.913297 | Copy gain    |
| BGC823 | chr20 | 49644701 | 50026200 | 1.0329   | Copy gain    |
| BGC823 | chr20 | 50026201 | 50257200 | 0.924297 | Copy gain    |
| BGC823 | chr20 | 50257201 | 50733200 | 0.772497 | Copy gain    |
| BGC823 | chr20 | 50733201 | 51820300 | 0.990097 | Copy gain    |
| BGC823 | chr20 | 51820301 | 51999500 | 1.3291   | Copy gain    |
| BGC823 | chr20 | 51999501 | 52084900 | 1.0357   | Copy gain    |
| BGC823 | chr20 | 52084901 | 52183600 | 0.707197 | Copy gain    |
| BGC823 | chr20 | 52183601 | 52210200 | 0.939597 | Copy gain    |
| BGC823 | chr20 | 52210201 | 52211600 | -4.5381  | Copy loss    |

|        |       |          |          |            |              |
|--------|-------|----------|----------|------------|--------------|
| BGC823 | chr20 | 52211601 | 52322200 | 0.594897   | Copy gain    |
| BGC823 | chr20 | 52322201 | 52553900 | 0.878197   | Copy gain    |
| BGC823 | chr20 | 52553901 | 53084500 | 1.0335     | Copy gain    |
| BGC823 | chr20 | 53084501 | 55134100 | 0.929997   | Copy gain    |
| BGC823 | chr20 | 55134101 | 55264300 | 0.704597   | Copy gain    |
| BGC823 | chr20 | 55264301 | 60638900 | 1.2261     | Copy gain    |
| BGC823 | chr20 | 60638901 | 61091438 | 0.980897   | Copy gain    |
| BGC823 | chr20 | 61141437 | 61213370 | 0.980897   | Copy gain    |
| BGC823 | chr20 | 61263369 | 62965521 | 0.980897   | Copy gain    |
| BGC823 | chr20 | 63025520 | 63025520 | 0.980897   | Copy gain    |
| BGC823 | chr21 | 9411193  | 9414300  | 0.407197   | Copy neutral |
| BGC823 | chr21 | 9414301  | 9595549  | 1.2828     | Copy gain    |
| BGC823 | chr21 | 9645548  | 9648100  | 1.2828     | Copy gain    |
| BGC823 | chr21 | 9648101  | 9695700  | 2.4416     | Copy gain    |
| BGC823 | chr21 | 9695701  | 9701300  | 5.3163     | Copy gain    |
| BGC823 | chr21 | 9701301  | 9775438  | 2.4142     | Copy gain    |
| BGC823 | chr21 | 9825437  | 9876300  | 2.4142     | Copy gain    |
| BGC823 | chr21 | 9876301  | 9998450  | 2.047      | Copy gain    |
| BGC823 | chr21 | 9998451  | 10034921 | 2.6508     | Copy gain    |
| BGC823 | chr21 | 10084920 | 10088050 | 4.0923     | Copy gain    |
| BGC823 | chr21 | 10088051 | 10133550 | 2.4175     | Copy gain    |
| BGC823 | chr21 | 10133551 | 10144400 | 3.8971     | Copy gain    |
| BGC823 | chr21 | 10144401 | 10215977 | 2.8154     | Copy gain    |
| BGC823 | chr21 | 10365976 | 10596600 | 1.2446     | Copy gain    |
| BGC823 | chr21 | 10596601 | 10603600 | 0.357197   | Copy neutral |
| BGC823 | chr21 | 10603601 | 10647897 | 1.4027     | Copy gain    |
| BGC823 | chr21 | 10697896 | 10724700 | 3.6331     | Copy gain    |
| BGC823 | chr21 | 10724701 | 10858400 | 2.2047     | Copy gain    |
| BGC823 | chr21 | 10858401 | 10894100 | 1.4615     | Copy gain    |
| BGC823 | chr21 | 10894101 | 10989300 | 1.0848     | Copy gain    |
| BGC823 | chr21 | 10989301 | 10994200 | 0.289997   | Copy neutral |
| BGC823 | chr21 | 10994201 | 11012400 | 1.0473     | Copy gain    |
| BGC823 | chr21 | 11012401 | 11031300 | 1.7656     | Copy gain    |
| BGC823 | chr21 | 11031301 | 11053000 | 2.4144     | Copy gain    |
| BGC823 | chr21 | 11053001 | 11085200 | 2.7362     | Copy gain    |
| BGC823 | chr21 | 11085201 | 11105500 | 2.4079     | Copy gain    |
| BGC823 | chr21 | 11105501 | 11107600 | 0.989597   | Copy gain    |
| BGC823 | chr21 | 11107601 | 11130700 | 2.7999     | Copy gain    |
| BGC823 | chr21 | 11130701 | 11134900 | 1.7897     | Copy gain    |
| BGC823 | chr21 | 11134901 | 11141200 | 2.5235     | Copy gain    |
| BGC823 | chr21 | 11141201 | 11151700 | 3.2094     | Copy gain    |
| BGC823 | chr21 | 11151701 | 11168500 | 2.4226     | Copy gain    |
| BGC823 | chr21 | 11168501 | 11170600 | 1.2446     | Copy gain    |
| BGC823 | chr21 | 11170601 | 11186700 | 2.5008     | Copy gain    |
| BGC823 | chr21 | 11186701 | 11188130 | 1.469      | Copy gain    |
| BGC823 | chr21 | 14338129 | 14372400 | 1.469      | Copy gain    |
| BGC823 | chr21 | 14372401 | 14447300 | 0.660997   | Copy gain    |
| BGC823 | chr21 | 14447301 | 14534800 | -2.0936    | Copy loss    |
| BGC823 | chr21 | 14534801 | 14569100 | -0.841903  | Copy loss    |
| BGC823 | chr21 | 14569101 | 15235500 | -0.0659026 | Copy neutral |
| BGC823 | chr21 | 15235501 | 15276450 | -0.373903  | Copy neutral |
| BGC823 | chr21 | 15276451 | 15283100 | 0.585097   | Copy gain    |

|        |       |          |          |            |              |
|--------|-------|----------|----------|------------|--------------|
| BGC823 | chr21 | 15283101 | 15341900 | 0.0702974  | Copy neutral |
| BGC823 | chr21 | 15341901 | 15350300 | 0.596397   | Copy gain    |
| BGC823 | chr21 | 15350301 | 15449700 | -0.144403  | Copy neutral |
| BGC823 | chr21 | 15449701 | 15470000 | -0.693403  | Copy loss    |
| BGC823 | chr21 | 15470001 | 15955800 | -0.159403  | Copy neutral |
| BGC823 | chr21 | 15955801 | 18732700 | 0.0613974  | Copy neutral |
| BGC823 | chr21 | 18732701 | 21608300 | -0.0739026 | Copy neutral |
| BGC823 | chr21 | 21608301 | 21620200 | -8.3229    | Copy loss    |
| BGC823 | chr21 | 21620201 | 21959000 | -0.0939026 | Copy neutral |
| BGC823 | chr21 | 21959001 | 21961100 | -2.2575    | Copy loss    |
| BGC823 | chr21 | 21961101 | 22520400 | -0.115303  | Copy neutral |
| BGC823 | chr21 | 22520401 | 24982300 | -0.0176026 | Copy neutral |
| BGC823 | chr21 | 24982301 | 25321100 | -0.152903  | Copy neutral |
| BGC823 | chr21 | 25321101 | 26862500 | -0.0277026 | Copy neutral |
| BGC823 | chr21 | 26862501 | 26866000 | -1.0344    | Copy loss    |
| BGC823 | chr21 | 26866001 | 26929000 | 0.0221974  | Copy neutral |
| BGC823 | chr21 | 26929001 | 27668200 | -0.152503  | Copy neutral |
| BGC823 | chr21 | 27668201 | 32152400 | 0.0206974  | Copy neutral |
| BGC823 | chr21 | 32152401 | 32453400 | -0.102603  | Copy neutral |
| BGC823 | chr21 | 32453401 | 33038600 | -0.286503  | Copy neutral |
| BGC823 | chr21 | 33038601 | 33397000 | -0.139603  | Copy neutral |
| BGC823 | chr21 | 33397001 | 34395900 | -0.0276026 | Copy neutral |
| BGC823 | chr21 | 34395901 | 34710200 | -0.121203  | Copy neutral |
| BGC823 | chr21 | 34710201 | 35090300 | -0.222903  | Copy neutral |
| BGC823 | chr21 | 35090301 | 36072400 | -0.0441026 | Copy neutral |
| BGC823 | chr21 | 36072401 | 36073800 | -5.3846    | Copy loss    |
| BGC823 | chr21 | 36073801 | 42955560 | -0.0552026 | Copy neutral |
| BGC823 | chr21 | 43005559 | 43226829 | -0.0552026 | Copy neutral |
| BGC823 | chr21 | 43227328 | 43249343 | -0.0552026 | Copy neutral |
| BGC823 | chr21 | 43250842 | 44632665 | -0.0552026 | Copy neutral |
| BGC823 | chr21 | 44682664 | 44970800 | -0.0552026 | Copy neutral |
| BGC823 | chr21 | 44970801 | 44972900 | -8.3671    | Copy loss    |
| BGC823 | chr21 | 44972901 | 46973500 | -0.0759026 | Copy neutral |
| BGC823 | chr21 | 46973501 | 46975600 | -5.6836    | Copy loss    |
| BGC823 | chr21 | 46975601 | 47054700 | -0.0248026 | Copy neutral |
| BGC823 | chr21 | 47054701 | 47056800 | 0.837497   | Copy gain    |
| BGC823 | chr21 | 47056801 | 47062400 | -0.138903  | Copy neutral |
| BGC823 | chr21 | 47062401 | 47063800 | -8.3671    | Copy loss    |
| BGC823 | chr21 | 47063801 | 48119896 | -0.114803  | Copy neutral |
| BGC823 | chr21 | 48129895 | 48129895 | -0.114803  | Copy neutral |
| BGC823 | chr22 | 16050000 | 16100000 | 0.130597   | Copy neutral |
| BGC823 | chr22 | 16100001 | 16258550 | 0.894697   | Copy gain    |
| BGC823 | chr22 | 16258551 | 16315600 | -1.4984    | Copy loss    |
| BGC823 | chr22 | 16315601 | 16357600 | 1.3611     | Copy gain    |
| BGC823 | chr22 | 16357601 | 16697851 | 0.138097   | Copy neutral |
| BGC823 | chr22 | 16847850 | 16865800 | 1.1874     | Copy gain    |
| BGC823 | chr22 | 16865801 | 16930200 | 0.790897   | Copy gain    |
| BGC823 | chr22 | 16930201 | 16963100 | 1.1959     | Copy gain    |
| BGC823 | chr22 | 16963101 | 17021900 | 0.587497   | Copy gain    |
| BGC823 | chr22 | 17021901 | 17091200 | -0.269203  | Copy neutral |
| BGC823 | chr22 | 17091201 | 17233300 | 0.0716974  | Copy neutral |
| BGC823 | chr22 | 17233301 | 17241000 | 1.356      | Copy gain    |

|        |       |          |          |             |              |
|--------|-------|----------|----------|-------------|--------------|
| BGC823 | chr22 | 17241001 | 17351600 | -0.0247026  | Copy neutral |
| BGC823 | chr22 | 17351601 | 17392900 | 0.972997    | Copy gain    |
| BGC823 | chr22 | 17392901 | 17497900 | 0.106997    | Copy neutral |
| BGC823 | chr22 | 17497901 | 17516100 | 0.891197    | Copy gain    |
| BGC823 | chr22 | 17516101 | 17518200 | -0.0162026  | Copy neutral |
| BGC823 | chr22 | 17518201 | 18057900 | -0.306103   | Copy neutral |
| BGC823 | chr22 | 18057901 | 18060000 | -8.1169     | Copy loss    |
| BGC823 | chr22 | 18060001 | 18718700 | -0.194503   | Copy neutral |
| BGC823 | chr22 | 18718701 | 18744950 | -8.3671     | Copy loss    |
| BGC823 | chr22 | 18744951 | 20351800 | -0.0394026  | Copy neutral |
| BGC823 | chr22 | 20351801 | 20509432 | -2.7846     | Copy loss    |
| BGC823 | chr22 | 20609431 | 20659100 | -2.7846     | Copy loss    |
| BGC823 | chr22 | 20659101 | 24343900 | -0.0980026  | Copy neutral |
| BGC823 | chr22 | 24343901 | 24397800 | -1.3276     | Copy loss    |
| BGC823 | chr22 | 24397801 | 25158700 | -0.00160263 | Copy neutral |
| BGC823 | chr22 | 25158701 | 25847500 | -0.194403   | Copy neutral |
| BGC823 | chr22 | 25847501 | 26062400 | -0.0385026  | Copy neutral |
| BGC823 | chr22 | 26062401 | 26234600 | -0.198903   | Copy neutral |
| BGC823 | chr22 | 26234601 | 26891200 | -0.0573026  | Copy neutral |
| BGC823 | chr22 | 26891201 | 27140400 | -0.185103   | Copy neutral |
| BGC823 | chr22 | 27140401 | 28514500 | -0.00530263 | Copy neutral |
| BGC823 | chr22 | 28514501 | 28751800 | 0.661797    | Copy gain    |
| BGC823 | chr22 | 28751801 | 37143400 | -0.109703   | Copy neutral |
| BGC823 | chr22 | 37143401 | 37146900 | -8.3671     | Copy loss    |
| BGC823 | chr22 | 37146901 | 50364778 | -0.125103   | Copy neutral |
| BGC823 | chr22 | 50414777 | 51244567 | -0.125103   | Copy neutral |
| BGC823 | chr22 | 51304566 | 51304566 | -0.125103   | Copy neutral |
| AGS    | chr1  | 10000    | 87600    | -2.02673    | Copy loss    |
| AGS    | chr1  | 87601    | 177418   | 2.40307     | Copy gain    |
| AGS    | chr1  | 227417   | 267720   | 2.40307     | Copy gain    |
| AGS    | chr1  | 317719   | 471369   | 2.40307     | Copy gain    |
| AGS    | chr1  | 521368   | 570000   | 2.40307     | Copy gain    |
| AGS    | chr1  | 570001   | 814800   | 0.286971    | Copy neutral |
| AGS    | chr1  | 814801   | 826200   | 1.55247     | Copy gain    |
| AGS    | chr1  | 826201   | 832200   | 0.363071    | Copy neutral |
| AGS    | chr1  | 832201   | 2634221  | -0.0214295  | Copy neutral |
| AGS    | chr1  | 2684220  | 3845269  | -0.0214295  | Copy neutral |
| AGS    | chr1  | 3995268  | 13052999 | -0.0214295  | Copy neutral |
| AGS    | chr1  | 13102998 | 13219913 | -0.0214295  | Copy neutral |
| AGS    | chr1  | 13319912 | 13557163 | -0.0214295  | Copy neutral |
| AGS    | chr1  | 13607162 | 16832400 | -0.0214295  | Copy neutral |
| AGS    | chr1  | 16832401 | 16842900 | 1.48957     | Copy gain    |
| AGS    | chr1  | 16842901 | 16854000 | 0.158371    | Copy neutral |
| AGS    | chr1  | 16854001 | 16867500 | 0.691171    | Copy gain    |
| AGS    | chr1  | 16867501 | 16890600 | 1.83837     | Copy gain    |
| AGS    | chr1  | 16890601 | 16895400 | 3.61287     | Copy gain    |
| AGS    | chr1  | 16895401 | 16945200 | 1.92057     | Copy gain    |
| AGS    | chr1  | 16945201 | 16990500 | 1.38707     | Copy gain    |
| AGS    | chr1  | 16990501 | 17010000 | 0.236971    | Copy neutral |
| AGS    | chr1  | 17010001 | 17012400 | 1.15867     | Copy gain    |
| AGS    | chr1  | 17012401 | 17035200 | 0.214571    | Copy neutral |
| AGS    | chr1  | 17035201 | 17052000 | 0.467671    | Copy gain    |

|     |      |           |           |             |              |
|-----|------|-----------|-----------|-------------|--------------|
| AGS | chr1 | 17052001  | 17084400  | 1.76947     | Copy gain    |
| AGS | chr1 | 17084401  | 17125659  | 1.12107     | Copy gain    |
| AGS | chr1 | 17175658  | 17178900  | 1.12107     | Copy gain    |
| AGS | chr1 | 17178901  | 17236200  | 0.753471    | Copy gain    |
| AGS | chr1 | 17236201  | 25594800  | 0.0473705   | Copy neutral |
| AGS | chr1 | 25594801  | 25660200  | -0.714229   | Copy loss    |
| AGS | chr1 | 25660201  | 27022200  | 0.0275705   | Copy neutral |
| AGS | chr1 | 27022201  | 27023400  | -8.76023    | Copy loss    |
| AGS | chr1 | 27023401  | 29878083  | 0.0411705   | Copy neutral |
| AGS | chr1 | 30028082  | 72766800  | 0.0411705   | Copy neutral |
| AGS | chr1 | 72766801  | 72811800  | -8.77003    | Copy loss    |
| AGS | chr1 | 72811801  | 75291000  | -0.0661295  | Copy neutral |
| AGS | chr1 | 75291001  | 79150800  | 0.0182705   | Copy neutral |
| AGS | chr1 | 79150801  | 80104200  | -0.0677295  | Copy neutral |
| AGS | chr1 | 80104201  | 82257600  | -0.131929   | Copy neutral |
| AGS | chr1 | 82257601  | 83590800  | -0.0431295  | Copy neutral |
| AGS | chr1 | 83590801  | 83957400  | 0.163271    | Copy neutral |
| AGS | chr1 | 83957401  | 84076200  | -0.0811295  | Copy neutral |
| AGS | chr1 | 84076201  | 84144000  | -0.181329   | Copy neutral |
| AGS | chr1 | 84144001  | 84337800  | -0.0461295  | Copy neutral |
| AGS | chr1 | 84337801  | 85980000  | 0.0656705   | Copy neutral |
| AGS | chr1 | 85980001  | 85986000  | 1.21757     | Copy gain    |
| AGS | chr1 | 85986001  | 86002200  | 1.49787     | Copy gain    |
| AGS | chr1 | 86002201  | 86005800  | 1.18827     | Copy gain    |
| AGS | chr1 | 86005801  | 87579000  | 0.109571    | Copy neutral |
| AGS | chr1 | 87579001  | 91698600  | 0.0261705   | Copy neutral |
| AGS | chr1 | 91698601  | 91924800  | 0.153271    | Copy neutral |
| AGS | chr1 | 91924801  | 91926600  | -5.07263    | Copy loss    |
| AGS | chr1 | 91926601  | 92338200  | 0.0763705   | Copy neutral |
| AGS | chr1 | 92338201  | 92434800  | -0.142229   | Copy neutral |
| AGS | chr1 | 92434801  | 93924000  | 0.0473705   | Copy neutral |
| AGS | chr1 | 93924001  | 95292000  | 0.130271    | Copy neutral |
| AGS | chr1 | 95292001  | 95521200  | 0.0385705   | Copy neutral |
| AGS | chr1 | 95521201  | 95526000  | -0.496529   | Copy loss    |
| AGS | chr1 | 95526001  | 96070800  | 0.0552705   | Copy neutral |
| AGS | chr1 | 96070801  | 96544200  | 0.00247054  | Copy neutral |
| AGS | chr1 | 96544201  | 97482000  | -0.0457295  | Copy neutral |
| AGS | chr1 | 97482001  | 99080100  | 0.0168705   | Copy neutral |
| AGS | chr1 | 99080101  | 99681600  | -0.0413295  | Copy neutral |
| AGS | chr1 | 99681601  | 102292800 | 0.0161705   | Copy neutral |
| AGS | chr1 | 102292801 | 103863907 | -0.146529   | Copy neutral |
| AGS | chr1 | 103913906 | 108120600 | -0.146529   | Copy neutral |
| AGS | chr1 | 108120601 | 108733200 | 0.0214705   | Copy neutral |
| AGS | chr1 | 108733201 | 108737400 | -0.835529   | Copy loss    |
| AGS | chr1 | 108737401 | 109446600 | 0.0947705   | Copy neutral |
| AGS | chr1 | 109446601 | 109570800 | 0.00447054  | Copy neutral |
| AGS | chr1 | 109570801 | 109575600 | -0.613129   | Copy loss    |
| AGS | chr1 | 109575601 | 109836600 | -0.00612946 | Copy neutral |
| AGS | chr1 | 109836601 | 110187600 | 0.0979705   | Copy neutral |
| AGS | chr1 | 110187601 | 110191200 | -8.62913    | Copy loss    |
| AGS | chr1 | 110191201 | 112692000 | 0.100871    | Copy neutral |
| AGS | chr1 | 112692001 | 112704600 | -7.17163    | Copy loss    |

|     |      |           |           |            |              |
|-----|------|-----------|-----------|------------|--------------|
| AGS | chr1 | 112704601 | 112720800 | 0.0125705  | Copy neutral |
| AGS | chr1 | 112720801 | 112912200 | 0.133671   | Copy neutral |
| AGS | chr1 | 112912201 | 113611500 | 0.00747054 | Copy neutral |
| AGS | chr1 | 113611501 | 113614200 | -4.93223   | Copy loss    |
| AGS | chr1 | 113614201 | 113813400 | 0.0506705  | Copy neutral |
| AGS | chr1 | 113813401 | 114140400 | 0.151471   | Copy neutral |
| AGS | chr1 | 114140401 | 115015200 | 0.0655705  | Copy neutral |
| AGS | chr1 | 115015201 | 115215000 | -0.0448295 | Copy neutral |
| AGS | chr1 | 115215001 | 118609800 | 0.0677705  | Copy neutral |
| AGS | chr1 | 118609801 | 119649000 | -0.0219295 | Copy neutral |
| AGS | chr1 | 119649001 | 119887200 | 0.0514705  | Copy neutral |
| AGS | chr1 | 119887201 | 120531600 | 0.146171   | Copy neutral |
| AGS | chr1 | 120531601 | 120636900 | 1.40287    | Copy gain    |
| AGS | chr1 | 120636901 | 120697157 | 0.843771   | Copy gain    |
| AGS | chr1 | 120747156 | 120793200 | 0.843771   | Copy gain    |
| AGS | chr1 | 120793201 | 120936696 | 0.273971   | Copy neutral |
| AGS | chr1 | 121086695 | 121100700 | 0.273971   | Copy neutral |
| AGS | chr1 | 121100701 | 121137000 | 1.71637    | Copy gain    |
| AGS | chr1 | 121137001 | 121143000 | 0.738171   | Copy gain    |
| AGS | chr1 | 121143001 | 121289400 | 0.00477054 | Copy neutral |
| AGS | chr1 | 121289401 | 121339800 | -0.947829  | Copy loss    |
| AGS | chr1 | 121339801 | 121351200 | 0.0616705  | Copy neutral |
| AGS | chr1 | 121351201 | 121365000 | 3.99447    | Copy gain    |
| AGS | chr1 | 121365001 | 121478400 | 0.582671   | Copy gain    |
| AGS | chr1 | 121478401 | 121485435 | 5.16227    | Copy gain    |
| AGS | chr1 | 142535434 | 142539600 | 5.16227    | Copy gain    |
| AGS | chr1 | 142539601 | 142603200 | 2.06377    | Copy gain    |
| AGS | chr1 | 142603201 | 142651800 | 1.64527    | Copy gain    |
| AGS | chr1 | 142651801 | 142654800 | 2.70947    | Copy gain    |
| AGS | chr1 | 142654801 | 142731023 | 1.59307    | Copy gain    |
| AGS | chr1 | 142781022 | 142846200 | 2.66727    | Copy gain    |
| AGS | chr1 | 142846201 | 142967762 | 2.10607    | Copy gain    |
| AGS | chr1 | 143117761 | 143118900 | 2.10607    | Copy gain    |
| AGS | chr1 | 143118901 | 143278200 | 1.25277    | Copy gain    |
| AGS | chr1 | 143278201 | 143283900 | 3.86117    | Copy gain    |
| AGS | chr1 | 143283901 | 143292817 | 0.455971   | Copy gain    |
| AGS | chr1 | 143342816 | 143533200 | 1.90277    | Copy gain    |
| AGS | chr1 | 143533201 | 143541600 | 3.14077    | Copy gain    |
| AGS | chr1 | 143541601 | 143544526 | 1.41277    | Copy gain    |
| AGS | chr1 | 143644525 | 143771003 | 1.41277    | Copy gain    |
| AGS | chr1 | 143871002 | 144004800 | 1.41277    | Copy gain    |
| AGS | chr1 | 144004801 | 144019800 | 2.01107    | Copy gain    |
| AGS | chr1 | 144019801 | 144081000 | 1.35957    | Copy gain    |
| AGS | chr1 | 144081001 | 144095784 | 0.0947705  | Copy neutral |
| AGS | chr1 | 144145783 | 144224482 | 0.0947705  | Copy neutral |
| AGS | chr1 | 144274481 | 144401745 | 0.0947705  | Copy neutral |
| AGS | chr1 | 144451744 | 144525900 | 0.0947705  | Copy neutral |
| AGS | chr1 | 144525901 | 144552600 | 2.30917    | Copy gain    |
| AGS | chr1 | 144552601 | 144622414 | 1.00437    | Copy gain    |
| AGS | chr1 | 144672413 | 144691500 | 1.00437    | Copy gain    |
| AGS | chr1 | 144691501 | 144710725 | 1.34537    | Copy gain    |
| AGS | chr1 | 144810724 | 144835500 | 1.34537    | Copy gain    |



|     |      |           |           |           |              |
|-----|------|-----------|-----------|-----------|--------------|
| AGS | chr1 | 144835501 | 144863400 | 1.64407   | Copy gain    |
| AGS | chr1 | 144863401 | 144896400 | 1.38407   | Copy gain    |
| AGS | chr1 | 144896401 | 144903000 | 0.942571  | Copy gain    |
| AGS | chr1 | 144903001 | 144906600 | 0.685971  | Copy gain    |
| AGS | chr1 | 144906601 | 144965700 | 1.48757   | Copy gain    |
| AGS | chr1 | 144965701 | 145092600 | 2.17997   | Copy gain    |
| AGS | chr1 | 145092601 | 145096800 | 0.0119705 | Copy neutral |
| AGS | chr1 | 145096801 | 145109400 | 2.19017   | Copy gain    |
| AGS | chr1 | 145109401 | 145124400 | 2.60247   | Copy gain    |
| AGS | chr1 | 145124401 | 145127400 | 1.99327   | Copy gain    |
| AGS | chr1 | 145127401 | 145186800 | 1.70597   | Copy gain    |
| AGS | chr1 | 145186801 | 145295100 | 2.30197   | Copy gain    |
| AGS | chr1 | 145295101 | 145381200 | 1.61887   | Copy gain    |
| AGS | chr1 | 145381201 | 145751400 | 0.561571  | Copy gain    |
| AGS | chr1 | 145751401 | 145773900 | 1.36677   | Copy gain    |
| AGS | chr1 | 145773901 | 145833119 | 0.888571  | Copy gain    |
| AGS | chr1 | 145883118 | 145913700 | 0.888571  | Copy gain    |
| AGS | chr1 | 145913701 | 146164651 | 1.63917   | Copy gain    |
| AGS | chr1 | 146214650 | 146253300 | 0.459471  | Copy gain    |
| AGS | chr1 | 146303299 | 146472600 | 0.459471  | Copy gain    |
| AGS | chr1 | 146472601 | 146488500 | 1.42747   | Copy gain    |
| AGS | chr1 | 146488501 | 146521200 | 0.682671  | Copy gain    |
| AGS | chr1 | 146521201 | 146557200 | 0.396571  | Copy neutral |
| AGS | chr1 | 146557201 | 147700500 | 0.633471  | Copy gain    |
| AGS | chr1 | 147700501 | 147715200 | 1.70097   | Copy gain    |
| AGS | chr1 | 147715201 | 147720600 | 1.21277   | Copy gain    |
| AGS | chr1 | 147720601 | 147731400 | 1.60547   | Copy gain    |
| AGS | chr1 | 147731401 | 148026039 | 0.637771  | Copy gain    |
| AGS | chr1 | 148176038 | 148202100 | 0.637771  | Copy gain    |
| AGS | chr1 | 148202101 | 148361359 | 1.86637   | Copy gain    |
| AGS | chr1 | 148511358 | 148684148 | 1.86637   | Copy gain    |
| AGS | chr1 | 148734147 | 148954461 | 1.86637   | Copy gain    |
| AGS | chr1 | 149004460 | 149035800 | 1.86637   | Copy gain    |
| AGS | chr1 | 149035801 | 149203800 | 0.476471  | Copy gain    |
| AGS | chr1 | 149203801 | 149206200 | 1.69707   | Copy gain    |
| AGS | chr1 | 149206201 | 149220600 | 0.470371  | Copy gain    |
| AGS | chr1 | 149220601 | 149228400 | 1.39907   | Copy gain    |
| AGS | chr1 | 149228401 | 149232000 | 0.329771  | Copy neutral |
| AGS | chr1 | 149232001 | 149240400 | 1.39437   | Copy gain    |
| AGS | chr1 | 149240401 | 149249400 | 0.585971  | Copy gain    |
| AGS | chr1 | 149249401 | 149259600 | 1.16617   | Copy gain    |
| AGS | chr1 | 149259601 | 149321700 | 1.81167   | Copy gain    |
| AGS | chr1 | 149321701 | 149374500 | 1.12287   | Copy gain    |
| AGS | chr1 | 149374501 | 149459646 | 0.544671  | Copy gain    |
| AGS | chr1 | 149509645 | 151857600 | 0.544671  | Copy gain    |
| AGS | chr1 | 151857601 | 152079600 | 0.692471  | Copy gain    |
| AGS | chr1 | 152079601 | 152085600 | 0.176871  | Copy neutral |
| AGS | chr1 | 152085601 | 152380800 | 0.784171  | Copy gain    |
| AGS | chr1 | 152380801 | 152761200 | 0.677471  | Copy gain    |
| AGS | chr1 | 152761201 | 152770800 | 0.131271  | Copy neutral |
| AGS | chr1 | 152770801 | 153447600 | 0.699371  | Copy gain    |
| AGS | chr1 | 153447601 | 154956000 | 0.520971  | Copy gain    |

|     |      |           |           |            |              |
|-----|------|-----------|-----------|------------|--------------|
| AGS | chr1 | 154956001 | 155302800 | 0.420871   | Copy neutral |
| AGS | chr1 | 155302801 | 156908400 | 0.503171   | Copy gain    |
| AGS | chr1 | 156908401 | 157005000 | 0.692771   | Copy gain    |
| AGS | chr1 | 157005001 | 157006200 | -0.863229  | Copy loss    |
| AGS | chr1 | 157006201 | 157894800 | 0.645371   | Copy gain    |
| AGS | chr1 | 157894801 | 158820000 | 0.566971   | Copy gain    |
| AGS | chr1 | 158820001 | 158830200 | 0.745471   | Copy gain    |
| AGS | chr1 | 158830201 | 158867400 | 0.476371   | Copy gain    |
| AGS | chr1 | 158867401 | 158869800 | -7.61023   | Copy loss    |
| AGS | chr1 | 158869801 | 159204000 | 0.547371   | Copy gain    |
| AGS | chr1 | 159204001 | 159648600 | 0.661671   | Copy gain    |
| AGS | chr1 | 159648601 | 159649800 | -4.56533   | Copy loss    |
| AGS | chr1 | 159649801 | 159738600 | 0.678871   | Copy gain    |
| AGS | chr1 | 159738601 | 160398600 | 0.595771   | Copy gain    |
| AGS | chr1 | 160398601 | 160897800 | 0.710271   | Copy gain    |
| AGS | chr1 | 160897801 | 161401800 | 0.502571   | Copy gain    |
| AGS | chr1 | 161401801 | 161621100 | 0.728771   | Copy gain    |
| AGS | chr1 | 161621101 | 161622600 | -5.58873   | Copy loss    |
| AGS | chr1 | 161622601 | 161744400 | 0.582471   | Copy gain    |
| AGS | chr1 | 161744401 | 161860200 | 0.747871   | Copy gain    |
| AGS | chr1 | 161860201 | 161865000 | 0.411471   | Copy neutral |
| AGS | chr1 | 161865001 | 161928000 | 0.780971   | Copy gain    |
| AGS | chr1 | 161928001 | 163319400 | 0.638871   | Copy gain    |
| AGS | chr1 | 163319401 | 164453400 | 0.580871   | Copy gain    |
| AGS | chr1 | 164453401 | 166524600 | 0.522971   | Copy gain    |
| AGS | chr1 | 166524601 | 167710800 | 0.597471   | Copy gain    |
| AGS | chr1 | 167710801 | 168053400 | 0.697871   | Copy gain    |
| AGS | chr1 | 168053401 | 168210600 | 0.565371   | Copy gain    |
| AGS | chr1 | 168210601 | 170479800 | 0.717071   | Copy gain    |
| AGS | chr1 | 170479801 | 170628600 | 0.598171   | Copy gain    |
| AGS | chr1 | 170628601 | 170639400 | 0.0444705  | Copy neutral |
| AGS | chr1 | 170639401 | 171773400 | 0.595571   | Copy gain    |
| AGS | chr1 | 171773401 | 173290800 | 0.710671   | Copy gain    |
| AGS | chr1 | 173290801 | 174166200 | 0.594271   | Copy gain    |
| AGS | chr1 | 174166201 | 174191400 | 0.753171   | Copy gain    |
| AGS | chr1 | 174191401 | 174205200 | -1.06323   | Copy loss    |
| AGS | chr1 | 174205201 | 174293400 | -8.73803   | Copy loss    |
| AGS | chr1 | 174293401 | 174383400 | 0.0962705  | Copy neutral |
| AGS | chr1 | 174383401 | 174725400 | 0.650371   | Copy gain    |
| AGS | chr1 | 174725401 | 174918000 | 0.469071   | Copy gain    |
| AGS | chr1 | 174918001 | 174994800 | 0.589271   | Copy gain    |
| AGS | chr1 | 174994801 | 174996600 | -0.681629  | Copy loss    |
| AGS | chr1 | 174996601 | 175806000 | 0.595971   | Copy gain    |
| AGS | chr1 | 175806001 | 177576000 | 0.481671   | Copy gain    |
| AGS | chr1 | 177576001 | 178064400 | 0.551671   | Copy gain    |
| AGS | chr1 | 178064401 | 186825000 | 0.639071   | Copy gain    |
| AGS | chr1 | 186825001 | 190026600 | 0.533671   | Copy gain    |
| AGS | chr1 | 190026601 | 190282800 | -0.0681295 | Copy neutral |
| AGS | chr1 | 190282801 | 205922708 | 0.582771   | Copy gain    |
| AGS | chr1 | 206072707 | 206332222 | 0.582771   | Copy gain    |
| AGS | chr1 | 206482221 | 210722400 | 0.582771   | Copy gain    |
| AGS | chr1 | 210722401 | 210724800 | -8.76023   | Copy loss    |

|     |      |           |           |             |              |
|-----|------|-----------|-----------|-------------|--------------|
| AGS | chr1 | 210724801 | 210891000 | 0.538971    | Copy gain    |
| AGS | chr1 | 210891001 | 210892200 | -0.732229   | Copy loss    |
| AGS | chr1 | 210892201 | 211009800 | 0.526971    | Copy gain    |
| AGS | chr1 | 211009801 | 223747847 | 0.611871    | Copy gain    |
| AGS | chr1 | 223797846 | 234318600 | 0.611871    | Copy gain    |
| AGS | chr1 | 234318601 | 234319800 | -5.97463    | Copy loss    |
| AGS | chr1 | 234319801 | 235192212 | 0.609471    | Copy gain    |
| AGS | chr1 | 235242211 | 236440200 | 0.609471    | Copy gain    |
| AGS | chr1 | 236440201 | 240138000 | 0.531971    | Copy gain    |
| AGS | chr1 | 240138001 | 240139200 | -1.19893    | Copy loss    |
| AGS | chr1 | 240139201 | 240948600 | 0.481771    | Copy gain    |
| AGS | chr1 | 240948601 | 242047800 | 0.559171    | Copy gain    |
| AGS | chr1 | 242047801 | 243102600 | 0.424171    | Copy neutral |
| AGS | chr1 | 243102601 | 243168600 | 0.520571    | Copy gain    |
| AGS | chr1 | 243168601 | 243183000 | 0.960671    | Copy gain    |
| AGS | chr1 | 243183001 | 243187800 | 0.480271    | Copy gain    |
| AGS | chr1 | 243187801 | 243209700 | 0.966071    | Copy gain    |
| AGS | chr1 | 243209701 | 243283200 | 0.477671    | Copy gain    |
| AGS | chr1 | 243283201 | 243384000 | 0.699571    | Copy gain    |
| AGS | chr1 | 243384001 | 243691800 | 0.452371    | Copy gain    |
| AGS | chr1 | 243691801 | 244012800 | 0.593671    | Copy gain    |
| AGS | chr1 | 244012801 | 244014000 | -8.76023    | Copy loss    |
| AGS | chr1 | 244014001 | 245591400 | 0.538871    | Copy gain    |
| AGS | chr1 | 245591401 | 245674200 | 0.00527054  | Copy neutral |
| AGS | chr1 | 245674201 | 245756400 | 0.491371    | Copy gain    |
| AGS | chr1 | 245756401 | 245761800 | 0.858271    | Copy gain    |
| AGS | chr1 | 245761801 | 245789400 | 0.501371    | Copy gain    |
| AGS | chr1 | 245789401 | 245809800 | 0.737971    | Copy gain    |
| AGS | chr1 | 245809801 | 245841600 | 0.513771    | Copy gain    |
| AGS | chr1 | 245841601 | 245960400 | 0.263571    | Copy neutral |
| AGS | chr1 | 245960401 | 245992800 | -0.00372946 | Copy neutral |
| AGS | chr1 | 245992801 | 246058800 | 0.231871    | Copy neutral |
| AGS | chr1 | 246058801 | 246063000 | -0.628629   | Copy loss    |
| AGS | chr1 | 246063001 | 246076500 | -0.277329   | Copy neutral |
| AGS | chr1 | 246076501 | 246084000 | -0.640029   | Copy loss    |
| AGS | chr1 | 246084001 | 246240600 | 0.231971    | Copy neutral |
| AGS | chr1 | 246240601 | 248908211 | 0.558971    | Copy gain    |
| AGS | chr1 | 249058210 | 249240622 | 0.558971    | Copy gain    |
| AGS | chr1 | 249250621 | 249250621 | 0.558971    | Copy gain    |
| AGS | chr2 | 10000     | 1539000   | -0.0996295  | Copy neutral |
| AGS | chr2 | 1539001   | 1540200   | -8.76023    | Copy loss    |
| AGS | chr2 | 1540201   | 3529313   | -0.106429   | Copy neutral |
| AGS | chr2 | 3579312   | 5018789   | -0.106429   | Copy neutral |
| AGS | chr2 | 5118788   | 5831400   | -0.106429   | Copy neutral |
| AGS | chr2 | 5831401   | 5833800   | -4.51613    | Copy loss    |
| AGS | chr2 | 5833801   | 7039800   | -0.167729   | Copy neutral |
| AGS | chr2 | 7039801   | 13206600  | 0.0427705   | Copy neutral |
| AGS | chr2 | 13206601  | 15394800  | -0.0994295  | Copy neutral |
| AGS | chr2 | 15394801  | 16279725  | 0.0491705   | Copy neutral |
| AGS | chr2 | 16329724  | 17890800  | 0.0491705   | Copy neutral |
| AGS | chr2 | 17890801  | 18451200  | -0.0286295  | Copy neutral |
| AGS | chr2 | 18451201  | 19134000  | 0.0436705   | Copy neutral |

|     |      |          |          |            |              |
|-----|------|----------|----------|------------|--------------|
| AGS | chr2 | 19134001 | 19767600 | 0.112671   | Copy neutral |
| AGS | chr2 | 19767601 | 19770600 | -0.797529  | Copy loss    |
| AGS | chr2 | 19770601 | 21146400 | 0.117371   | Copy neutral |
| AGS | chr2 | 21146401 | 21153114 | 0.0243705  | Copy neutral |
| AGS | chr2 | 21178113 | 21574200 | 0.0243705  | Copy neutral |
| AGS | chr2 | 21574201 | 23290800 | -0.128629  | Copy neutral |
| AGS | chr2 | 23290801 | 31725000 | 0.0553705  | Copy neutral |
| AGS | chr2 | 31725001 | 31725940 | -6.45953   | Copy loss    |
| AGS | chr2 | 31726790 | 31727400 | -6.45953   | Copy loss    |
| AGS | chr2 | 31727401 | 33092198 | -0.0351295 | Copy neutral |
| AGS | chr2 | 33093197 | 33141693 | -0.0351295 | Copy neutral |
| AGS | chr2 | 33142692 | 34524000 | -0.0351295 | Copy neutral |
| AGS | chr2 | 34524001 | 34525200 | -8.36683   | Copy loss    |
| AGS | chr2 | 34525201 | 34695600 | -0.163929  | Copy neutral |
| AGS | chr2 | 34695601 | 34736400 | -1.28083   | Copy loss    |
| AGS | chr2 | 34736401 | 36287400 | -0.103729  | Copy neutral |
| AGS | chr2 | 36287401 | 48648000 | 0.0721705  | Copy neutral |
| AGS | chr2 | 48648001 | 51776400 | -0.0635295 | Copy neutral |
| AGS | chr2 | 51776401 | 51777600 | -5.23773   | Copy loss    |
| AGS | chr2 | 51777601 | 52749600 | -0.0384295 | Copy neutral |
| AGS | chr2 | 52749601 | 52785600 | -1.11253   | Copy loss    |
| AGS | chr2 | 52785601 | 54247200 | -0.0212295 | Copy neutral |
| AGS | chr2 | 54247201 | 54564600 | 0.0922705  | Copy neutral |
| AGS | chr2 | 54564601 | 54565800 | -1.14743   | Copy loss    |
| AGS | chr2 | 54565801 | 54567000 | -8.76023   | Copy loss    |
| AGS | chr2 | 54567001 | 56297400 | 0.0824705  | Copy neutral |
| AGS | chr2 | 56297401 | 56652600 | 0.0112705  | Copy neutral |
| AGS | chr2 | 56652601 | 56656200 | -0.873229  | Copy loss    |
| AGS | chr2 | 56656201 | 58011000 | 0.00697054 | Copy neutral |
| AGS | chr2 | 58011001 | 58645200 | 0.0674705  | Copy neutral |
| AGS | chr2 | 58645201 | 59245800 | 0.00247054 | Copy neutral |
| AGS | chr2 | 59245801 | 60226800 | -0.0503295 | Copy neutral |
| AGS | chr2 | 60226801 | 62149200 | 0.00957054 | Copy neutral |
| AGS | chr2 | 62149201 | 68677200 | 0.0939705  | Copy neutral |
| AGS | chr2 | 68677201 | 68679000 | -5.79263   | Copy loss    |
| AGS | chr2 | 68679001 | 76009200 | 0.0777705  | Copy neutral |
| AGS | chr2 | 76009201 | 76773600 | -0.106129  | Copy neutral |
| AGS | chr2 | 76773601 | 76775400 | -8.76023   | Copy loss    |
| AGS | chr2 | 76775401 | 84189000 | -0.0800295 | Copy neutral |
| AGS | chr2 | 84189001 | 87135000 | 0.0687705  | Copy neutral |
| AGS | chr2 | 87135001 | 87141600 | -5.17663   | Copy loss    |
| AGS | chr2 | 87141601 | 87580500 | 0.305271   | Copy neutral |
| AGS | chr2 | 87580501 | 87599400 | 1.63647    | Copy gain    |
| AGS | chr2 | 87599401 | 87640200 | -0.107529  | Copy neutral |
| AGS | chr2 | 87640201 | 87668207 | 0.255971   | Copy neutral |
| AGS | chr2 | 87718206 | 87820200 | 0.255971   | Copy neutral |
| AGS | chr2 | 87820201 | 87823500 | -0.253929  | Copy neutral |
| AGS | chr2 | 87823501 | 87825000 | -6.38303   | Copy loss    |
| AGS | chr2 | 87825001 | 87843300 | -0.534129  | Copy loss    |
| AGS | chr2 | 87843301 | 88142100 | 0.323671   | Copy neutral |
| AGS | chr2 | 88142101 | 88214100 | 0.935971   | Copy gain    |
| AGS | chr2 | 88214101 | 88259100 | 0.477771   | Copy gain    |

|     |      |           |           |             |              |
|-----|------|-----------|-----------|-------------|--------------|
| AGS | chr2 | 88259101  | 88656600  | 0.0205705   | Copy neutral |
| AGS | chr2 | 88656601  | 88836000  | -0.132129   | Copy neutral |
| AGS | chr2 | 88836001  | 89070600  | -0.00412946 | Copy neutral |
| AGS | chr2 | 89070601  | 89083800  | 1.16307     | Copy gain    |
| AGS | chr2 | 89083801  | 89100600  | 0.218571    | Copy neutral |
| AGS | chr2 | 89100601  | 89106000  | 1.39087     | Copy gain    |
| AGS | chr2 | 89106001  | 89630437  | 0.0778705   | Copy neutral |
| AGS | chr2 | 89830436  | 89865000  | 1.13177     | Copy gain    |
| AGS | chr2 | 89865001  | 89880000  | 3.00057     | Copy gain    |
| AGS | chr2 | 89880001  | 89889000  | 0.837471    | Copy gain    |
| AGS | chr2 | 89889001  | 90281100  | 0.0267705   | Copy neutral |
| AGS | chr2 | 90281101  | 90321526  | 0.833071    | Copy gain    |
| AGS | chr2 | 90371525  | 90545104  | 0.833071    | Copy gain    |
| AGS | chr2 | 91595103  | 91759200  | 0.833071    | Copy gain    |
| AGS | chr2 | 91759201  | 91764000  | 2.17797     | Copy gain    |
| AGS | chr2 | 91764001  | 91773600  | 2.74917     | Copy gain    |
| AGS | chr2 | 91773601  | 91776000  | 2.07207     | Copy gain    |
| AGS | chr2 | 91776001  | 91779000  | 1.09687     | Copy gain    |
| AGS | chr2 | 91779001  | 91822200  | 2.48547     | Copy gain    |
| AGS | chr2 | 91822201  | 91844400  | 1.59567     | Copy gain    |
| AGS | chr2 | 91844401  | 91848600  | 0.710571    | Copy gain    |
| AGS | chr2 | 91848601  | 91923300  | 1.64317     | Copy gain    |
| AGS | chr2 | 91923301  | 92289600  | 0.635671    | Copy gain    |
| AGS | chr2 | 92289601  | 92298900  | 4.78937     | Copy gain    |
| AGS | chr2 | 92298901  | 92305200  | 0.699271    | Copy gain    |
| AGS | chr2 | 92305201  | 92326172  | 6.99427     | Copy gain    |
| AGS | chr2 | 95326171  | 95326800  | 6.99427     | Copy gain    |
| AGS | chr2 | 95326801  | 96515400  | 0.112171    | Copy neutral |
| AGS | chr2 | 96515401  | 96527400  | 1.72997     | Copy gain    |
| AGS | chr2 | 96527401  | 96592800  | 0.516271    | Copy gain    |
| AGS | chr2 | 96592801  | 96625800  | 1.25097     | Copy gain    |
| AGS | chr2 | 96625801  | 96646800  | 0.554771    | Copy gain    |
| AGS | chr2 | 96646801  | 97534800  | 0.0835705   | Copy neutral |
| AGS | chr2 | 97534801  | 97536000  | -8.76023    | Copy loss    |
| AGS | chr2 | 97536001  | 97671000  | 0.0168705   | Copy neutral |
| AGS | chr2 | 97671001  | 97797900  | 0.309271    | Copy neutral |
| AGS | chr2 | 97797901  | 97847400  | 0.881071    | Copy gain    |
| AGS | chr2 | 97847401  | 97854600  | 0.179171    | Copy neutral |
| AGS | chr2 | 97854601  | 97855800  | -5.58863    | Copy loss    |
| AGS | chr2 | 97855801  | 97860000  | 0.177871    | Copy neutral |
| AGS | chr2 | 97860001  | 97870200  | 1.27877     | Copy gain    |
| AGS | chr2 | 97870201  | 97873800  | 0.447571    | Copy neutral |
| AGS | chr2 | 97873801  | 97994400  | 1.36387     | Copy gain    |
| AGS | chr2 | 97994401  | 98125800  | -0.0369295  | Copy neutral |
| AGS | chr2 | 98125801  | 98162400  | -6.59873    | Copy loss    |
| AGS | chr2 | 98162401  | 104042400 | 0.0303705   | Copy neutral |
| AGS | chr2 | 104042401 | 104043600 | -5.75733    | Copy loss    |
| AGS | chr2 | 104043601 | 105471600 | -0.107029   | Copy neutral |
| AGS | chr2 | 105471601 | 105472800 | -8.76023    | Copy loss    |
| AGS | chr2 | 105472801 | 106873200 | 0.0412705   | Copy neutral |
| AGS | chr2 | 106873201 | 106875600 | -0.842829   | Copy loss    |
| AGS | chr2 | 106875601 | 106879200 | -0.0822295  | Copy neutral |

|     |      |           |           |             |              |
|-----|------|-----------|-----------|-------------|--------------|
| AGS | chr2 | 106879201 | 106885800 | -0.920729   | Copy loss    |
| AGS | chr2 | 106885801 | 107082900 | -0.00602946 | Copy neutral |
| AGS | chr2 | 107082901 | 107084400 | -8.76023    | Copy loss    |
| AGS | chr2 | 107084401 | 110109338 | 0.0907705   | Copy neutral |
| AGS | chr2 | 110251337 | 112722000 | 0.0907705   | Copy neutral |
| AGS | chr2 | 112722001 | 112808400 | 0.687571    | Copy gain    |
| AGS | chr2 | 112808401 | 112813800 | 0.242471    | Copy neutral |
| AGS | chr2 | 112813801 | 112844400 | 0.724471    | Copy gain    |
| AGS | chr2 | 112844401 | 114168000 | 0.128971    | Copy neutral |
| AGS | chr2 | 114168001 | 114186900 | 0.884371    | Copy gain    |
| AGS | chr2 | 114186901 | 114251100 | 0.252271    | Copy neutral |
| AGS | chr2 | 114251101 | 114262800 | -0.876829   | Copy loss    |
| AGS | chr2 | 114262801 | 114321300 | 0.239471    | Copy neutral |
| AGS | chr2 | 114321301 | 114357000 | 0.887771    | Copy gain    |
| AGS | chr2 | 114357001 | 115466400 | 0.0834705   | Copy neutral |
| AGS | chr2 | 115466401 | 115627800 | -0.0155295  | Copy neutral |
| AGS | chr2 | 115627801 | 115629000 | -1.46253    | Copy loss    |
| AGS | chr2 | 115629001 | 116004000 | -0.0471295  | Copy neutral |
| AGS | chr2 | 116004001 | 116075400 | 0.531271    | Copy gain    |
| AGS | chr2 | 116075401 | 116082600 | -0.0292295  | Copy neutral |
| AGS | chr2 | 116082601 | 116091000 | 0.250071    | Copy neutral |
| AGS | chr2 | 116091001 | 118421400 | -0.0914295  | Copy neutral |
| AGS | chr2 | 118421401 | 121102800 | 0.0604705   | Copy neutral |
| AGS | chr2 | 121102801 | 121104000 | -8.76023    | Copy loss    |
| AGS | chr2 | 121104001 | 123339600 | 0.0572705   | Copy neutral |
| AGS | chr2 | 123339601 | 127256400 | -0.0806295  | Copy neutral |
| AGS | chr2 | 127256401 | 132763200 | 0.0366705   | Copy neutral |
| AGS | chr2 | 132763201 | 132768600 | 0.612671    | Copy gain    |
| AGS | chr2 | 132768601 | 132775800 | 2.08197     | Copy gain    |
| AGS | chr2 | 132775801 | 132836400 | 0.676971    | Copy gain    |
| AGS | chr2 | 132836401 | 132966000 | 0.218471    | Copy neutral |
| AGS | chr2 | 132966001 | 133001400 | 0.865971    | Copy gain    |
| AGS | chr2 | 133001401 | 133031400 | 2.05237     | Copy gain    |
| AGS | chr2 | 133031401 | 133111800 | 1.02097     | Copy gain    |
| AGS | chr2 | 133111801 | 133121400 | 1.58497     | Copy gain    |
| AGS | chr2 | 133121401 | 137103600 | 0.00797054  | Copy neutral |
| AGS | chr2 | 137103601 | 137105400 | -8.76023    | Copy loss    |
| AGS | chr2 | 137105401 | 137487600 | -0.00332946 | Copy neutral |
| AGS | chr2 | 137487601 | 138288000 | -0.100929   | Copy neutral |
| AGS | chr2 | 138288001 | 138532200 | -0.0384295  | Copy neutral |
| AGS | chr2 | 138532201 | 139928400 | 0.0314705   | Copy neutral |
| AGS | chr2 | 139928401 | 142396200 | -0.0861295  | Copy neutral |
| AGS | chr2 | 142396201 | 142397400 | -2.22603    | Copy loss    |
| AGS | chr2 | 142397401 | 142503600 | -0.0844295  | Copy neutral |
| AGS | chr2 | 142503601 | 142621200 | -1.22413    | Copy loss    |
| AGS | chr2 | 142621201 | 143305200 | -0.0977295  | Copy neutral |
| AGS | chr2 | 143305201 | 147830400 | -0.0261295  | Copy neutral |
| AGS | chr2 | 147830401 | 149690583 | 0.0726705   | Copy neutral |
| AGS | chr2 | 149790582 | 151982400 | 0.0726705   | Copy neutral |
| AGS | chr2 | 151982401 | 157686000 | -0.0208295  | Copy neutral |
| AGS | chr2 | 157686001 | 162131400 | 0.109671    | Copy neutral |
| AGS | chr2 | 162131401 | 162135000 | -0.164729   | Copy neutral |

|     |      |           |           |             |              |
|-----|------|-----------|-----------|-------------|--------------|
| AGS | chr2 | 162135001 | 162139200 | 3.86547     | Copy gain    |
| AGS | chr2 | 162139201 | 170322000 | 0.0294705   | Copy neutral |
| AGS | chr2 | 170322001 | 170324400 | -8.76023    | Copy loss    |
| AGS | chr2 | 170324401 | 187080600 | 0.0594705   | Copy neutral |
| AGS | chr2 | 187080601 | 187155600 | -0.991829   | Copy loss    |
| AGS | chr2 | 187155601 | 194689800 | 0.0518705   | Copy neutral |
| AGS | chr2 | 194689801 | 194698800 | -8.53543    | Copy loss    |
| AGS | chr2 | 194698801 | 195328200 | -0.0242295  | Copy neutral |
| AGS | chr2 | 195328201 | 195329400 | -8.76023    | Copy loss    |
| AGS | chr2 | 195329401 | 195599400 | -0.0380295  | Copy neutral |
| AGS | chr2 | 195599401 | 209630400 | 0.0384705   | Copy neutral |
| AGS | chr2 | 209630401 | 215728800 | -0.0553295  | Copy neutral |
| AGS | chr2 | 215728801 | 215730600 | -8.76023    | Copy loss    |
| AGS | chr2 | 215730601 | 234003742 | 0.0454705   | Copy neutral |
| AGS | chr2 | 234053741 | 239801979 | 0.0454705   | Copy neutral |
| AGS | chr2 | 239831978 | 240784133 | 0.0454705   | Copy neutral |
| AGS | chr2 | 240809132 | 242745000 | 0.0454705   | Copy neutral |
| AGS | chr2 | 242745001 | 242748300 | -8.76023    | Copy loss    |
| AGS | chr2 | 242748301 | 242853000 | -0.00662946 | Copy neutral |
| AGS | chr2 | 242853001 | 243035400 | -0.672829   | Copy loss    |
| AGS | chr2 | 243035401 | 243050400 | 0.181571    | Copy neutral |
| AGS | chr2 | 243050401 | 243072900 | 0.498271    | Copy gain    |
| AGS | chr2 | 243072901 | 243102477 | 0.900571    | Copy gain    |
| AGS | chr2 | 243152476 | 243189374 | 0.900571    | Copy gain    |
| AGS | chr2 | 243199373 | 243199373 | 0.900571    | Copy gain    |
| AGS | chr3 | 60000     | 613800    | -0.115829   | Copy neutral |
| AGS | chr3 | 613801    | 623700    | 0.386071    | Copy neutral |
| AGS | chr3 | 623701    | 650400    | 0.941671    | Copy gain    |
| AGS | chr3 | 650401    | 662400    | 0.608971    | Copy gain    |
| AGS | chr3 | 662401    | 4675200   | -0.121429   | Copy neutral |
| AGS | chr3 | 4675201   | 5065200   | 0.0168705   | Copy neutral |
| AGS | chr3 | 5065201   | 5178000   | -0.113729   | Copy neutral |
| AGS | chr3 | 5178001   | 5670000   | 0.0156705   | Copy neutral |
| AGS | chr3 | 5670001   | 6977400   | -0.0612295  | Copy neutral |
| AGS | chr3 | 6977401   | 8091000   | 0.00957054  | Copy neutral |
| AGS | chr3 | 8091001   | 9518400   | 0.0867705   | Copy neutral |
| AGS | chr3 | 9518401   | 10319400  | 0.00357054  | Copy neutral |
| AGS | chr3 | 10319401  | 10786200  | 0.108171    | Copy neutral |
| AGS | chr3 | 10786201  | 10787400  | -0.912229   | Copy loss    |
| AGS | chr3 | 10787401  | 11171400  | 0.112371    | Copy neutral |
| AGS | chr3 | 11171401  | 11782200  | 0.0172705   | Copy neutral |
| AGS | chr3 | 11782201  | 11784000  | -0.854629   | Copy loss    |
| AGS | chr3 | 11784001  | 11829000  | -0.0331295  | Copy neutral |
| AGS | chr3 | 11829001  | 12557400  | 0.120771    | Copy neutral |
| AGS | chr3 | 12557401  | 12843000  | -0.0329295  | Copy neutral |
| AGS | chr3 | 12843001  | 13740600  | 0.0477705   | Copy neutral |
| AGS | chr3 | 13740601  | 14824200  | 0.121971    | Copy neutral |
| AGS | chr3 | 14824201  | 15161400  | 0.0408705   | Copy neutral |
| AGS | chr3 | 15161401  | 15196800  | 0.259671    | Copy neutral |
| AGS | chr3 | 15196801  | 16158600  | 0.0563705   | Copy neutral |
| AGS | chr3 | 16158601  | 16159800  | -1.34093    | Copy loss    |
| AGS | chr3 | 16159801  | 16234800  | 0.0879705   | Copy neutral |

|     |      |          |          |              |              |
|-----|------|----------|----------|--------------|--------------|
| AGS | chr3 | 16234801 | 17088600 | -0.00182946  | Copy neutral |
| AGS | chr3 | 17088601 | 17380200 | -0.0780295   | Copy neutral |
| AGS | chr3 | 17380201 | 18755700 | 0.0193705    | Copy neutral |
| AGS | chr3 | 18755701 | 19471800 | -0.0382295   | Copy neutral |
| AGS | chr3 | 19471801 | 19920000 | 0.0468705    | Copy neutral |
| AGS | chr3 | 19920001 | 20311200 | -0.0850295   | Copy neutral |
| AGS | chr3 | 20311201 | 20317800 | -0.800529    | Copy loss    |
| AGS | chr3 | 20317801 | 20665200 | -0.0265295   | Copy neutral |
| AGS | chr3 | 20665201 | 22168200 | -0.124029    | Copy neutral |
| AGS | chr3 | 22168201 | 22279200 | -0.0562295   | Copy neutral |
| AGS | chr3 | 22279201 | 22286400 | -1.34353     | Copy loss    |
| AGS | chr3 | 22286401 | 22690800 | -0.0712295   | Copy neutral |
| AGS | chr3 | 22690801 | 24999000 | 0.0642705    | Copy neutral |
| AGS | chr3 | 24999001 | 25481400 | -0.00842946  | Copy neutral |
| AGS | chr3 | 25481401 | 25485600 | -0.593729    | Copy loss    |
| AGS | chr3 | 25485601 | 25897200 | -0.0398295   | Copy neutral |
| AGS | chr3 | 25897201 | 26451000 | -0.0941295   | Copy neutral |
| AGS | chr3 | 26451001 | 26452200 | -1.25773     | Copy loss    |
| AGS | chr3 | 26452201 | 26814600 | -0.121629    | Copy neutral |
| AGS | chr3 | 26814601 | 28557000 | -0.000529464 | Copy neutral |
| AGS | chr3 | 28557001 | 29054400 | -0.0816295   | Copy neutral |
| AGS | chr3 | 29054401 | 29803800 | -0.0107295   | Copy neutral |
| AGS | chr3 | 29803801 | 32758800 | 0.0965705    | Copy neutral |
| AGS | chr3 | 32758801 | 32833800 | -0.162629    | Copy neutral |
| AGS | chr3 | 32833801 | 33120000 | -0.850429    | Copy loss    |
| AGS | chr3 | 33120001 | 33177600 | 0.0238705    | Copy neutral |
| AGS | chr3 | 33177601 | 33402000 | 0.147671     | Copy neutral |
| AGS | chr3 | 33402001 | 34745400 | 0.0445705    | Copy neutral |
| AGS | chr3 | 34745401 | 34746600 | -8.76023     | Copy loss    |
| AGS | chr3 | 34746601 | 39760800 | 0.0404705    | Copy neutral |
| AGS | chr3 | 39760801 | 39762000 | -5.53103     | Copy loss    |
| AGS | chr3 | 39762001 | 54154200 | 0.0542705    | Copy neutral |
| AGS | chr3 | 54154201 | 56353200 | -0.0898295   | Copy neutral |
| AGS | chr3 | 56353201 | 59205600 | 0.0384705    | Copy neutral |
| AGS | chr3 | 59205601 | 59206800 | -8.76023     | Copy loss    |
| AGS | chr3 | 59206801 | 59737200 | -0.00892946  | Copy neutral |
| AGS | chr3 | 59737201 | 59893800 | -1.09123     | Copy loss    |
| AGS | chr3 | 59893801 | 59986800 | -0.101029    | Copy neutral |
| AGS | chr3 | 59986801 | 60034800 | -1.23353     | Copy loss    |
| AGS | chr3 | 60034801 | 60073200 | -8.68273     | Copy loss    |
| AGS | chr3 | 60073201 | 60109800 | -1.28413     | Copy loss    |
| AGS | chr3 | 60109801 | 60177600 | -0.150429    | Copy neutral |
| AGS | chr3 | 60177601 | 60212400 | -1.30363     | Copy loss    |
| AGS | chr3 | 60212401 | 60261600 | -8.76023     | Copy loss    |
| AGS | chr3 | 60261601 | 60266400 | -1.43683     | Copy loss    |
| AGS | chr3 | 60266401 | 60291600 | -0.140629    | Copy neutral |
| AGS | chr3 | 60291601 | 60309000 | -1.35533     | Copy loss    |
| AGS | chr3 | 60309001 | 60311400 | -8.76023     | Copy loss    |
| AGS | chr3 | 60311401 | 60327600 | -1.33743     | Copy loss    |
| AGS | chr3 | 60327601 | 60739200 | -8.68763     | Copy loss    |
| AGS | chr3 | 60739201 | 60897000 | -1.23603     | Copy loss    |
| AGS | chr3 | 60897001 | 60906600 | -0.143329    | Copy neutral |



|     |      |           |           |             |              |
|-----|------|-----------|-----------|-------------|--------------|
| AGS | chr3 | 60906601  | 60920400  | -1.05833    | Copy loss    |
| AGS | chr3 | 60920401  | 60923400  | -8.60283    | Copy loss    |
| AGS | chr3 | 60923401  | 61011000  | -1.19313    | Copy loss    |
| AGS | chr3 | 61011001  | 61073400  | -8.66633    | Copy loss    |
| AGS | chr3 | 61073401  | 61185600  | -1.24073    | Copy loss    |
| AGS | chr3 | 61185601  | 66170271  | 0.0112705   | Copy neutral |
| AGS | chr3 | 66270270  | 71802600  | 0.0112705   | Copy neutral |
| AGS | chr3 | 71802601  | 71803800  | -8.76023    | Copy loss    |
| AGS | chr3 | 71803801  | 71822400  | -0.102629   | Copy neutral |
| AGS | chr3 | 71822401  | 72123000  | 0.0602705   | Copy neutral |
| AGS | chr3 | 72123001  | 72124200  | -1.68643    | Copy loss    |
| AGS | chr3 | 72124201  | 72882000  | 0.0776705   | Copy neutral |
| AGS | chr3 | 72882001  | 73890600  | -0.00192946 | Copy neutral |
| AGS | chr3 | 73890601  | 75270600  | -0.124929   | Copy neutral |
| AGS | chr3 | 75270601  | 75276600  | 0.668771    | Copy gain    |
| AGS | chr3 | 75276601  | 75569400  | -0.0921295  | Copy neutral |
| AGS | chr3 | 75569401  | 75593400  | -3.67583    | Copy loss    |
| AGS | chr3 | 75593401  | 75606600  | -0.652529   | Copy loss    |
| AGS | chr3 | 75606601  | 75673200  | -0.0965295  | Copy neutral |
| AGS | chr3 | 75673201  | 75679200  | 0.269671    | Copy neutral |
| AGS | chr3 | 75679201  | 75692400  | 1.23877     | Copy gain    |
| AGS | chr3 | 75692401  | 75699000  | 2.22607     | Copy gain    |
| AGS | chr3 | 75699001  | 75728400  | 1.25677     | Copy gain    |
| AGS | chr3 | 75728401  | 75730200  | 1.77497     | Copy gain    |
| AGS | chr3 | 75730201  | 75739200  | 2.55697     | Copy gain    |
| AGS | chr3 | 75739201  | 75756000  | 1.92577     | Copy gain    |
| AGS | chr3 | 75756001  | 75793800  | 1.16767     | Copy gain    |
| AGS | chr3 | 75793801  | 75811200  | 0.358671    | Copy neutral |
| AGS | chr3 | 75811201  | 75823800  | -0.00962946 | Copy neutral |
| AGS | chr3 | 75823801  | 75835200  | 0.329271    | Copy neutral |
| AGS | chr3 | 75835201  | 75846000  | 1.27817     | Copy gain    |
| AGS | chr3 | 75846001  | 75853200  | 0.499671    | Copy gain    |
| AGS | chr3 | 75853201  | 75856800  | -0.310629   | Copy neutral |
| AGS | chr3 | 75856801  | 75916800  | 0.364471    | Copy neutral |
| AGS | chr3 | 75916801  | 75983400  | 0.00337054  | Copy neutral |
| AGS | chr3 | 75983401  | 75999000  | 0.893171    | Copy gain    |
| AGS | chr3 | 75999001  | 84105000  | -0.0662295  | Copy neutral |
| AGS | chr3 | 84105001  | 84107400  | -8.56353    | Copy loss    |
| AGS | chr3 | 84107401  | 84850200  | -0.0774295  | Copy neutral |
| AGS | chr3 | 84850201  | 84876000  | -1.26453    | Copy loss    |
| AGS | chr3 | 84876001  | 90504855  | -0.0656295  | Copy neutral |
| AGS | chr3 | 93504854  | 96338400  | -0.0656295  | Copy neutral |
| AGS | chr3 | 96338401  | 96340200  | -7.40643    | Copy loss    |
| AGS | chr3 | 96340201  | 97757400  | -0.0629295  | Copy neutral |
| AGS | chr3 | 97757401  | 98410200  | 0.0412705   | Copy neutral |
| AGS | chr3 | 98410201  | 98414400  | -1.09583    | Copy loss    |
| AGS | chr3 | 98414401  | 98459400  | -0.133629   | Copy neutral |
| AGS | chr3 | 98459401  | 98899200  | 0.0859705   | Copy neutral |
| AGS | chr3 | 98899201  | 98902200  | -8.76023    | Copy loss    |
| AGS | chr3 | 98902201  | 114180000 | 0.0207705   | Copy neutral |
| AGS | chr3 | 114180001 | 114247200 | -1.09093    | Copy loss    |
| AGS | chr3 | 114247201 | 114568800 | 0.00267054  | Copy neutral |

|     |      |           |           |             |              |
|-----|------|-----------|-----------|-------------|--------------|
| AGS | chr3 | 114568801 | 114591000 | -1.12493    | Copy loss    |
| AGS | chr3 | 114591001 | 115758600 | -0.0158295  | Copy neutral |
| AGS | chr3 | 115758601 | 118005600 | -0.148629   | Copy neutral |
| AGS | chr3 | 118005601 | 118574400 | -0.0481295  | Copy neutral |
| AGS | chr3 | 118574401 | 129763200 | 0.0672705   | Copy neutral |
| AGS | chr3 | 129763201 | 129799200 | -0.790129   | Copy loss    |
| AGS | chr3 | 129799201 | 130900200 | 0.0527705   | Copy neutral |
| AGS | chr3 | 130900201 | 131708400 | -0.0377295  | Copy neutral |
| AGS | chr3 | 131708401 | 131713200 | -0.912729   | Copy loss    |
| AGS | chr3 | 131713201 | 131989200 | 0.0295705   | Copy neutral |
| AGS | chr3 | 131989201 | 131994300 | -8.23103    | Copy loss    |
| AGS | chr3 | 131994301 | 132864000 | 0.0233705   | Copy neutral |
| AGS | chr3 | 132864001 | 134397000 | 0.0948705   | Copy neutral |
| AGS | chr3 | 134397001 | 134651400 | 0.0186705   | Copy neutral |
| AGS | chr3 | 134651401 | 135427200 | -0.0642295  | Copy neutral |
| AGS | chr3 | 135427201 | 135875400 | 0.0596705   | Copy neutral |
| AGS | chr3 | 135875401 | 135989400 | -0.114529   | Copy neutral |
| AGS | chr3 | 135989401 | 136021200 | 0.0962705   | Copy neutral |
| AGS | chr3 | 136021201 | 136026000 | -8.76023    | Copy loss    |
| AGS | chr3 | 136026001 | 136565400 | -0.0367295  | Copy neutral |
| AGS | chr3 | 136565401 | 136590000 | -1.12263    | Copy loss    |
| AGS | chr3 | 136590001 | 138833400 | 0.0206705   | Copy neutral |
| AGS | chr3 | 138833401 | 138834600 | -8.76023    | Copy loss    |
| AGS | chr3 | 138834601 | 143122200 | 0.0445705   | Copy neutral |
| AGS | chr3 | 143122201 | 148207200 | -0.0484295  | Copy neutral |
| AGS | chr3 | 148207201 | 162511800 | 0.0404705   | Copy neutral |
| AGS | chr3 | 162511801 | 162625200 | -1.01343    | Copy loss    |
| AGS | chr3 | 162625201 | 162640200 | 0.0856705   | Copy neutral |
| AGS | chr3 | 162640201 | 162717600 | -0.0386295  | Copy neutral |
| AGS | chr3 | 162717601 | 162724200 | -0.960129   | Copy loss    |
| AGS | chr3 | 162724201 | 162765000 | 0.0575705   | Copy neutral |
| AGS | chr3 | 162765001 | 162769200 | -1.07233    | Copy loss    |
| AGS | chr3 | 162769201 | 166845000 | -0.0674295  | Copy neutral |
| AGS | chr3 | 166845001 | 166849200 | -1.02243    | Copy loss    |
| AGS | chr3 | 166849201 | 167539800 | -0.0564295  | Copy neutral |
| AGS | chr3 | 167539801 | 168434400 | -0.00102946 | Copy neutral |
| AGS | chr3 | 168434401 | 169488000 | 0.0654705   | Copy neutral |
| AGS | chr3 | 169488001 | 169489200 | -8.76023    | Copy loss    |
| AGS | chr3 | 169489201 | 174463800 | 0.0634705   | Copy neutral |
| AGS | chr3 | 174463801 | 174715800 | -1.14803    | Copy loss    |
| AGS | chr3 | 174715801 | 175167000 | -0.0667295  | Copy neutral |
| AGS | chr3 | 175167001 | 175273200 | -1.09663    | Copy loss    |
| AGS | chr3 | 175273201 | 178966800 | 0.0100705   | Copy neutral |
| AGS | chr3 | 178966801 | 180585600 | -0.0662295  | Copy neutral |
| AGS | chr3 | 180585601 | 180694200 | -0.222129   | Copy neutral |
| AGS | chr3 | 180694201 | 180972600 | -0.0622295  | Copy neutral |
| AGS | chr3 | 180972601 | 181412400 | 0.00937054  | Copy neutral |
| AGS | chr3 | 181412401 | 181684800 | -0.116729   | Copy neutral |
| AGS | chr3 | 181684801 | 181816800 | 0.0906705   | Copy neutral |
| AGS | chr3 | 181816801 | 181818000 | -1.42543    | Copy loss    |
| AGS | chr3 | 181818001 | 182682000 | 0.0817705   | Copy neutral |
| AGS | chr3 | 182682001 | 184219800 | 0.0170705   | Copy neutral |

|     |      |           |           |             |              |
|-----|------|-----------|-----------|-------------|--------------|
| AGS | chr3 | 184219801 | 185064600 | 0.0919705   | Copy neutral |
| AGS | chr3 | 185064601 | 185747400 | 0.00667054  | Copy neutral |
| AGS | chr3 | 185747401 | 186462600 | 0.0899705   | Copy neutral |
| AGS | chr3 | 186462601 | 186743400 | -0.0124295  | Copy neutral |
| AGS | chr3 | 186743401 | 187460400 | 0.0919705   | Copy neutral |
| AGS | chr3 | 187460401 | 187465200 | -0.674929   | Copy loss    |
| AGS | chr3 | 187465201 | 187846800 | 0.125471    | Copy neutral |
| AGS | chr3 | 187846801 | 188653800 | 0.0428705   | Copy neutral |
| AGS | chr3 | 188653801 | 189363000 | 0.0921705   | Copy neutral |
| AGS | chr3 | 189363001 | 189370800 | -0.982629   | Copy loss    |
| AGS | chr3 | 189370801 | 189433800 | 0.105371    | Copy neutral |
| AGS | chr3 | 189433801 | 191941200 | 0.00657054  | Copy neutral |
| AGS | chr3 | 191941201 | 192670800 | 0.0716705   | Copy neutral |
| AGS | chr3 | 192670801 | 192874800 | 0.181571    | Copy neutral |
| AGS | chr3 | 192874801 | 192885600 | -0.846329   | Copy loss    |
| AGS | chr3 | 192885601 | 193826400 | 0.135971    | Copy neutral |
| AGS | chr3 | 193826401 | 194041962 | 0.0401705   | Copy neutral |
| AGS | chr3 | 194047251 | 194398800 | 0.0401705   | Copy neutral |
| AGS | chr3 | 194398801 | 194400000 | -8.76023    | Copy loss    |
| AGS | chr3 | 194400001 | 195221400 | 0.0625705   | Copy neutral |
| AGS | chr3 | 195221401 | 195232500 | 2.03387     | Copy gain    |
| AGS | chr3 | 195232501 | 195343800 | 0.0905705   | Copy neutral |
| AGS | chr3 | 195343801 | 195399000 | 0.445771    | Copy neutral |
| AGS | chr3 | 195399001 | 195406800 | 0.0540705   | Copy neutral |
| AGS | chr3 | 195406801 | 195436800 | 0.502471    | Copy gain    |
| AGS | chr3 | 195436801 | 195438600 | 1.40817     | Copy gain    |
| AGS | chr3 | 195438601 | 195450300 | 0.518171    | Copy gain    |
| AGS | chr3 | 195450301 | 195511800 | 0.0316705   | Copy neutral |
| AGS | chr3 | 195511801 | 195886800 | -0.772229   | Copy loss    |
| AGS | chr3 | 195886801 | 197962431 | 0.0439705   | Copy neutral |
| AGS | chr3 | 198022430 | 198022430 | 0.0439705   | Copy neutral |
| AGS | chr4 | 10000     | 22200     | -1.10023    | Copy loss    |
| AGS | chr4 | 22201     | 52800     | 2.48687     | Copy gain    |
| AGS | chr4 | 52801     | 55200     | 1.57477     | Copy gain    |
| AGS | chr4 | 55201     | 69000     | 2.53437     | Copy gain    |
| AGS | chr4 | 69001     | 1423147   | -0.00622946 | Copy neutral |
| AGS | chr4 | 1478646   | 8799204   | -0.00622946 | Copy neutral |
| AGS | chr4 | 8818203   | 9158400   | -0.00622946 | Copy neutral |
| AGS | chr4 | 9158401   | 9167400   | -5.27253    | Copy loss    |
| AGS | chr4 | 9167401   | 9197400   | -2.53173    | Copy loss    |
| AGS | chr4 | 9197401   | 9212400   | -5.89543    | Copy loss    |
| AGS | chr4 | 9212401   | 9274643   | -1.86503    | Copy loss    |
| AGS | chr4 | 9324642   | 9457200   | 0.106071    | Copy neutral |
| AGS | chr4 | 9457201   | 9481200   | -0.811629   | Copy loss    |
| AGS | chr4 | 9481201   | 10211400  | 0.0158705   | Copy neutral |
| AGS | chr4 | 10211401  | 10234200  | -8.76023    | Copy loss    |
| AGS | chr4 | 10234201  | 12715200  | 0.0424705   | Copy neutral |
| AGS | chr4 | 12715201  | 12717000  | -5.87903    | Copy loss    |
| AGS | chr4 | 12717001  | 13266000  | -0.120629   | Copy neutral |
| AGS | chr4 | 13266001  | 13452000  | -1.17073    | Copy loss    |
| AGS | chr4 | 13452001  | 15004800  | -0.0496295  | Copy neutral |
| AGS | chr4 | 15004801  | 15006000  | -8.76023    | Copy loss    |

|     |      |          |          |             |              |
|-----|------|----------|----------|-------------|--------------|
| AGS | chr4 | 15006001 | 20709600 | -0.0777295  | Copy neutral |
| AGS | chr4 | 20709601 | 27434400 | 0.000270536 | Copy neutral |
| AGS | chr4 | 27434401 | 28036800 | -0.0717295  | Copy neutral |
| AGS | chr4 | 28036801 | 29746800 | -0.115829   | Copy neutral |
| AGS | chr4 | 29746801 | 30915000 | -0.0435295  | Copy neutral |
| AGS | chr4 | 30915001 | 30991800 | 0.562671    | Copy gain    |
| AGS | chr4 | 30991801 | 31204800 | 0.00127054  | Copy neutral |
| AGS | chr4 | 31204801 | 31207800 | -0.643529   | Copy loss    |
| AGS | chr4 | 31207801 | 31440600 | 0.0203705   | Copy neutral |
| AGS | chr4 | 31440601 | 31441800 | -1.63653    | Copy loss    |
| AGS | chr4 | 31441801 | 31820918 | -0.0387295  | Copy neutral |
| AGS | chr4 | 31837417 | 32833800 | -0.0387295  | Copy neutral |
| AGS | chr4 | 32833801 | 32834639 | -8.76023    | Copy loss    |
| AGS | chr4 | 32840638 | 32841600 | -8.76023    | Copy loss    |
| AGS | chr4 | 32841601 | 40296397 | -0.0167295  | Copy neutral |
| AGS | chr4 | 40297096 | 43453200 | -0.0167295  | Copy neutral |
| AGS | chr4 | 43453201 | 43454400 | -8.76023    | Copy loss    |
| AGS | chr4 | 43454401 | 43587000 | -0.129729   | Copy neutral |
| AGS | chr4 | 43587001 | 43588200 | -1.66463    | Copy loss    |
| AGS | chr4 | 43588201 | 46203000 | -0.154129   | Copy neutral |
| AGS | chr4 | 46203001 | 46204800 | -8.76023    | Copy loss    |
| AGS | chr4 | 46204801 | 46266600 | -0.0651295  | Copy neutral |
| AGS | chr4 | 46266601 | 46267800 | -1.53943    | Copy loss    |
| AGS | chr4 | 46267801 | 46695600 | -0.0305295  | Copy neutral |
| AGS | chr4 | 46695601 | 47508000 | -0.0992295  | Copy neutral |
| AGS | chr4 | 47508001 | 48365100 | 0.0141705   | Copy neutral |
| AGS | chr4 | 48365101 | 48367200 | -4.93573    | Copy loss    |
| AGS | chr4 | 48367201 | 49093200 | 0.0614705   | Copy neutral |
| AGS | chr4 | 49093201 | 49158600 | 4.48817     | Copy gain    |
| AGS | chr4 | 49158601 | 49177200 | 2.23437     | Copy gain    |
| AGS | chr4 | 49177201 | 49258200 | 1.12187     | Copy gain    |
| AGS | chr4 | 49258201 | 49338942 | 2.70887     | Copy gain    |
| AGS | chr4 | 49488941 | 49511700 | 0.970471    | Copy gain    |
| AGS | chr4 | 49511701 | 49517400 | 4.79777     | Copy gain    |
| AGS | chr4 | 49517401 | 49524000 | 0.452971    | Copy gain    |
| AGS | chr4 | 49524001 | 49541100 | 1.62277     | Copy gain    |
| AGS | chr4 | 49541101 | 49634400 | 0.920271    | Copy gain    |
| AGS | chr4 | 49634401 | 49645200 | 3.16107     | Copy gain    |
| AGS | chr4 | 49645201 | 49660118 | 1.83947     | Copy gain    |
| AGS | chr4 | 52660117 | 52764000 | -0.125329   | Copy neutral |
| AGS | chr4 | 52764001 | 58341600 | 0.0418705   | Copy neutral |
| AGS | chr4 | 58341601 | 59739334 | -0.0688295  | Copy neutral |
| AGS | chr4 | 59789333 | 64694400 | -0.0688295  | Copy neutral |
| AGS | chr4 | 64694401 | 64714800 | -1.29913    | Copy loss    |
| AGS | chr4 | 64714801 | 68263800 | -0.0463295  | Copy neutral |
| AGS | chr4 | 68263801 | 68266800 | 5.35667     | Copy gain    |
| AGS | chr4 | 68266801 | 74226600 | -0.0129295  | Copy neutral |
| AGS | chr4 | 74226601 | 75427380 | 0.105871    | Copy neutral |
| AGS | chr4 | 75452279 | 76472400 | 0.105871    | Copy neutral |
| AGS | chr4 | 76472401 | 76881000 | -0.0286295  | Copy neutral |
| AGS | chr4 | 76881001 | 78118800 | 0.0972705   | Copy neutral |
| AGS | chr4 | 78118801 | 78480600 | 0.212071    | Copy neutral |

|     |      |           |           |            |              |
|-----|------|-----------|-----------|------------|--------------|
| AGS | chr4 | 78480601  | 78586800  | 0.104271   | Copy neutral |
| AGS | chr4 | 78586801  | 78588000  | -0.991129  | Copy loss    |
| AGS | chr4 | 78588001  | 78687600  | 0.135471   | Copy neutral |
| AGS | chr4 | 78687601  | 78810000  | -0.0291295 | Copy neutral |
| AGS | chr4 | 78810001  | 80445000  | 0.116171   | Copy neutral |
| AGS | chr4 | 80445001  | 91660800  | 0.00857054 | Copy neutral |
| AGS | chr4 | 91660801  | 91901400  | -1.23333   | Copy loss    |
| AGS | chr4 | 91901401  | 91940400  | -0.0920295 | Copy neutral |
| AGS | chr4 | 91940401  | 92023800  | -1.14963   | Copy loss    |
| AGS | chr4 | 92023801  | 94360200  | -0.0561295 | Copy neutral |
| AGS | chr4 | 94360201  | 110674200 | 0.0303705  | Copy neutral |
| AGS | chr4 | 110674201 | 110675400 | -5.21353   | Copy loss    |
| AGS | chr4 | 110675401 | 113517600 | 0.0239705  | Copy neutral |
| AGS | chr4 | 113517601 | 113746800 | -0.132929  | Copy neutral |
| AGS | chr4 | 113746801 | 115174800 | 0.0344705  | Copy neutral |
| AGS | chr4 | 115174801 | 115183800 | -1.00793   | Copy loss    |
| AGS | chr4 | 115183801 | 115642800 | 0.101971   | Copy neutral |
| AGS | chr4 | 115642801 | 116774400 | 0.00357054 | Copy neutral |
| AGS | chr4 | 116774401 | 119125200 | -0.0774295 | Copy neutral |
| AGS | chr4 | 119125201 | 119130000 | -1.13373   | Copy loss    |
| AGS | chr4 | 119130001 | 119139000 | -0.152729  | Copy neutral |
| AGS | chr4 | 119139001 | 119323200 | -0.0116295 | Copy neutral |
| AGS | chr4 | 119323201 | 119346000 | 0.100471   | Copy neutral |
| AGS | chr4 | 119346001 | 119481000 | 0.268371   | Copy neutral |
| AGS | chr4 | 119481001 | 120505200 | 0.0777705  | Copy neutral |
| AGS | chr4 | 120505201 | 122282400 | -0.0140295 | Copy neutral |
| AGS | chr4 | 122282401 | 122290200 | -1.13513   | Copy loss    |
| AGS | chr4 | 122290201 | 123106200 | 0.00567054 | Copy neutral |
| AGS | chr4 | 123106201 | 124214400 | 0.0790705  | Copy neutral |
| AGS | chr4 | 124214401 | 125369400 | 0.0294705  | Copy neutral |
| AGS | chr4 | 125369401 | 133180800 | -0.0682295 | Copy neutral |
| AGS | chr4 | 133180801 | 133182600 | -8.49793   | Copy loss    |
| AGS | chr4 | 133182601 | 149413800 | -0.0169295 | Copy neutral |
| AGS | chr4 | 149413801 | 149415300 | -8.76023   | Copy loss    |
| AGS | chr4 | 149415301 | 150561000 | -0.0562295 | Copy neutral |
| AGS | chr4 | 150561001 | 161266800 | 0.0238705  | Copy neutral |
| AGS | chr4 | 161266801 | 161878800 | -0.0423295 | Copy neutral |
| AGS | chr4 | 161878801 | 161884800 | -0.987629  | Copy loss    |
| AGS | chr4 | 161884801 | 162448500 | -0.0737295 | Copy neutral |
| AGS | chr4 | 162448501 | 162451200 | -1.28883   | Copy loss    |
| AGS | chr4 | 162451201 | 163278600 | -0.0738295 | Copy neutral |
| AGS | chr4 | 163278601 | 163281600 | -1.25043   | Copy loss    |
| AGS | chr4 | 163281601 | 165202800 | -0.0906295 | Copy neutral |
| AGS | chr4 | 165202801 | 165208200 | -1.02783   | Copy loss    |
| AGS | chr4 | 165208201 | 166002600 | -0.125229  | Copy neutral |
| AGS | chr4 | 166002601 | 166005000 | -8.76023   | Copy loss    |
| AGS | chr4 | 166005001 | 168712800 | -0.0563295 | Copy neutral |
| AGS | chr4 | 168712801 | 171154800 | 0.0509705  | Copy neutral |
| AGS | chr4 | 171154801 | 172989000 | -0.0954295 | Copy neutral |
| AGS | chr4 | 172989001 | 172992600 | -1.31093   | Copy loss    |
| AGS | chr4 | 172992601 | 173425200 | -0.0787295 | Copy neutral |
| AGS | chr4 | 173425201 | 173433000 | -8.69973   | Copy loss    |

|     |      |           |           |             |              |
|-----|------|-----------|-----------|-------------|--------------|
| AGS | chr4 | 173433001 | 174405000 | 0.00627054  | Copy neutral |
| AGS | chr4 | 174405001 | 174406200 | -8.76023    | Copy loss    |
| AGS | chr4 | 174406201 | 175624800 | 0.0102705   | Copy neutral |
| AGS | chr4 | 175624801 | 175627200 | -1.00243    | Copy loss    |
| AGS | chr4 | 175627201 | 176178900 | 0.00197054  | Copy neutral |
| AGS | chr4 | 176178901 | 182577000 | -0.126529   | Copy neutral |
| AGS | chr4 | 182577001 | 186441600 | -0.00672946 | Copy neutral |
| AGS | chr4 | 186441601 | 186444000 | -8.76023    | Copy loss    |
| AGS | chr4 | 186444001 | 190470000 | -0.0947295  | Copy neutral |
| AGS | chr4 | 190470001 | 190535400 | 1.65067     | Copy gain    |
| AGS | chr4 | 190535401 | 190538400 | -0.158129   | Copy neutral |
| AGS | chr4 | 190538401 | 190684800 | 1.59647     | Copy gain    |
| AGS | chr4 | 190684801 | 190795800 | -0.149429   | Copy neutral |
| AGS | chr4 | 190795801 | 190822200 | 1.64567     | Copy gain    |
| AGS | chr4 | 190822201 | 191023200 | 0.785871    | Copy gain    |
| AGS | chr4 | 191023201 | 191040600 | 2.17667     | Copy gain    |
| AGS | chr4 | 191040601 | 191044277 | -2.40503    | Copy loss    |
| AGS | chr4 | 191154276 | 191154276 | -2.40503    | Copy loss    |
| AGS | chr5 | 10000     | 698100    | 0.0279705   | Copy neutral |
| AGS | chr5 | 698101    | 714600    | 0.691371    | Copy gain    |
| AGS | chr5 | 714601    | 745200    | 1.16237     | Copy gain    |
| AGS | chr5 | 745201    | 753600    | 0.362071    | Copy neutral |
| AGS | chr5 | 753601    | 777600    | 0.713271    | Copy gain    |
| AGS | chr5 | 777601    | 786600    | 0.181171    | Copy neutral |
| AGS | chr5 | 786601    | 800400    | 0.957571    | Copy gain    |
| AGS | chr5 | 800401    | 815400    | 0.410471    | Copy neutral |
| AGS | chr5 | 815401    | 2751000   | -0.0351295  | Copy neutral |
| AGS | chr5 | 2751001   | 2752200   | -8.76023    | Copy loss    |
| AGS | chr5 | 2752201   | 4190400   | -0.141629   | Copy neutral |
| AGS | chr5 | 4190401   | 4191600   | -4.94293    | Copy loss    |
| AGS | chr5 | 4191601   | 4669200   | -0.149129   | Copy neutral |
| AGS | chr5 | 4669201   | 5551800   | -0.0191295  | Copy neutral |
| AGS | chr5 | 5551801   | 5682000   | -0.0868295  | Copy neutral |
| AGS | chr5 | 5682001   | 5714400   | 0.449471    | Copy neutral |
| AGS | chr5 | 5714401   | 6713400   | -0.115929   | Copy neutral |
| AGS | chr5 | 6713401   | 6714600   | -8.76023    | Copy loss    |
| AGS | chr5 | 6714601   | 17530658  | -0.0416295  | Copy neutral |
| AGS | chr5 | 17580657  | 21450000  | -0.0416295  | Copy neutral |
| AGS | chr5 | 21450001  | 21452400  | -8.56353    | Copy loss    |
| AGS | chr5 | 21452401  | 21457200  | 0.0832705   | Copy neutral |
| AGS | chr5 | 21457201  | 21478500  | -0.289229   | Copy neutral |
| AGS | chr5 | 21478501  | 21494700  | 2.27187     | Copy gain    |
| AGS | chr5 | 21494701  | 21516900  | 0.432071    | Copy neutral |
| AGS | chr5 | 21516901  | 21573000  | 0.956071    | Copy gain    |
| AGS | chr5 | 21573001  | 21710700  | -0.0349295  | Copy neutral |
| AGS | chr5 | 21710701  | 21712200  | -4.94533    | Copy loss    |
| AGS | chr5 | 21712201  | 21937800  | -0.0478295  | Copy neutral |
| AGS | chr5 | 21937801  | 22015800  | 0.177071    | Copy neutral |
| AGS | chr5 | 22015801  | 23903400  | -0.101929   | Copy neutral |
| AGS | chr5 | 23903401  | 23905200  | -8.49793    | Copy loss    |
| AGS | chr5 | 23905201  | 25167600  | -0.129529   | Copy neutral |
| AGS | chr5 | 25167601  | 25750800  | -0.0591295  | Copy neutral |

|     |      |          |          |             |              |
|-----|------|----------|----------|-------------|--------------|
| AGS | chr5 | 25750801 | 26797800 | -0.135429   | Copy neutral |
| AGS | chr5 | 26797801 | 26802000 | -1.63823    | Copy loss    |
| AGS | chr5 | 26802001 | 27519600 | -0.104729   | Copy neutral |
| AGS | chr5 | 27519601 | 27529800 | -1.37783    | Copy loss    |
| AGS | chr5 | 27529801 | 28618800 | -0.0685295  | Copy neutral |
| AGS | chr5 | 28618801 | 28620000 | -5.07623    | Copy loss    |
| AGS | chr5 | 28620001 | 29424600 | -0.0918295  | Copy neutral |
| AGS | chr5 | 29424601 | 29434200 | 0.783271    | Copy gain    |
| AGS | chr5 | 29434201 | 32229000 | -0.0591295  | Copy neutral |
| AGS | chr5 | 32229001 | 33057000 | 0.0269705   | Copy neutral |
| AGS | chr5 | 33057001 | 34067400 | -0.0367295  | Copy neutral |
| AGS | chr5 | 34067401 | 34179000 | 0.274971    | Copy neutral |
| AGS | chr5 | 34179001 | 34197600 | 1.55117     | Copy gain    |
| AGS | chr5 | 34197601 | 34410600 | 0.234971    | Copy neutral |
| AGS | chr5 | 34410601 | 36076200 | -0.00602946 | Copy neutral |
| AGS | chr5 | 36076201 | 36798000 | 0.117371    | Copy neutral |
| AGS | chr5 | 36798001 | 37012200 | 0.192171    | Copy neutral |
| AGS | chr5 | 37012201 | 37238400 | 0.0749705   | Copy neutral |
| AGS | chr5 | 37238401 | 37428600 | -0.105429   | Copy neutral |
| AGS | chr5 | 37428601 | 39858600 | 0.0915705   | Copy neutral |
| AGS | chr5 | 39858601 | 40766400 | 0.0330705   | Copy neutral |
| AGS | chr5 | 40766401 | 40912800 | -0.106629   | Copy neutral |
| AGS | chr5 | 40912801 | 41717400 | 0.0249705   | Copy neutral |
| AGS | chr5 | 41717401 | 42628800 | -0.0716295  | Copy neutral |
| AGS | chr5 | 42628801 | 42631200 | -1.02753    | Copy loss    |
| AGS | chr5 | 42631201 | 43043400 | -0.0416295  | Copy neutral |
| AGS | chr5 | 43043401 | 43044600 | -2.06363    | Copy loss    |
| AGS | chr5 | 43044601 | 43181400 | -0.0854295  | Copy neutral |
| AGS | chr5 | 43181401 | 43206600 | -0.346629   | Copy neutral |
| AGS | chr5 | 43206601 | 43254000 | -0.113829   | Copy neutral |
| AGS | chr5 | 43254001 | 44714400 | -0.00352946 | Copy neutral |
| AGS | chr5 | 44714401 | 45004800 | -0.0794295  | Copy neutral |
| AGS | chr5 | 45004801 | 45014400 | -1.32223    | Copy loss    |
| AGS | chr5 | 45014401 | 45371400 | -0.0817295  | Copy neutral |
| AGS | chr5 | 45371401 | 45372600 | -5.06763    | Copy loss    |
| AGS | chr5 | 45372601 | 46405642 | -0.0861295  | Copy neutral |
| AGS | chr5 | 49405641 | 49441200 | 4.71497     | Copy gain    |
| AGS | chr5 | 49441201 | 49941000 | -0.0375295  | Copy neutral |
| AGS | chr5 | 49941001 | 49942200 | -8.76023    | Copy loss    |
| AGS | chr5 | 49942201 | 50234400 | -0.0754295  | Copy neutral |
| AGS | chr5 | 50234401 | 50239800 | -0.927129   | Copy loss    |
| AGS | chr5 | 50239801 | 51855600 | -0.00242946 | Copy neutral |
| AGS | chr5 | 51855601 | 53157600 | 0.0840705   | Copy neutral |
| AGS | chr5 | 53157601 | 54058200 | -0.0373295  | Copy neutral |
| AGS | chr5 | 54058201 | 55300200 | 0.0456705   | Copy neutral |
| AGS | chr5 | 55300201 | 55470600 | -0.0469295  | Copy neutral |
| AGS | chr5 | 55470601 | 56332200 | 0.104671    | Copy neutral |
| AGS | chr5 | 56332201 | 56553600 | -0.0289295  | Copy neutral |
| AGS | chr5 | 56553601 | 57323400 | 0.102771    | Copy neutral |
| AGS | chr5 | 57323401 | 57333600 | -8.53163    | Copy loss    |
| AGS | chr5 | 57333601 | 58693800 | 0.0140705   | Copy neutral |
| AGS | chr5 | 58693801 | 58719000 | -1.01123    | Copy loss    |

|     |      |           |           |            |              |
|-----|------|-----------|-----------|------------|--------------|
| AGS | chr5 | 58719001  | 58723800  | -1.61773   | Copy loss    |
| AGS | chr5 | 58723801  | 58733400  | -0.926029  | Copy loss    |
| AGS | chr5 | 58733401  | 64093200  | -0.0214295 | Copy neutral |
| AGS | chr5 | 64093201  | 68332200  | 0.0657705  | Copy neutral |
| AGS | chr5 | 68332201  | 70319400  | -0.0538295 | Copy neutral |
| AGS | chr5 | 70319401  | 70381200  | -3.37113   | Copy loss    |
| AGS | chr5 | 70381201  | 79895400  | 0.0857705  | Copy neutral |
| AGS | chr5 | 79895401  | 79896600  | -5.92403   | Copy loss    |
| AGS | chr5 | 79896601  | 81761400  | 0.0593705  | Copy neutral |
| AGS | chr5 | 81761401  | 81762600  | -5.02663   | Copy loss    |
| AGS | chr5 | 81762601  | 83265600  | 0.0828705  | Copy neutral |
| AGS | chr5 | 83265601  | 83948100  | -0.0467295 | Copy neutral |
| AGS | chr5 | 83948101  | 83955000  | -8.68873   | Copy loss    |
| AGS | chr5 | 83955001  | 85554600  | -0.0813295 | Copy neutral |
| AGS | chr5 | 85554601  | 86115000  | -0.0147295 | Copy neutral |
| AGS | chr5 | 86115001  | 86117400  | -1.26513   | Copy loss    |
| AGS | chr5 | 86117401  | 87968400  | 0.0286705  | Copy neutral |
| AGS | chr5 | 87968401  | 87991800  | -0.284429  | Copy neutral |
| AGS | chr5 | 87991801  | 90499800  | 0.00957054 | Copy neutral |
| AGS | chr5 | 90499801  | 90501600  | -8.76023   | Copy loss    |
| AGS | chr5 | 90501601  | 91636129  | 0.0101705  | Copy neutral |
| AGS | chr5 | 91686128  | 106324800 | 0.0101705  | Copy neutral |
| AGS | chr5 | 106324801 | 106326000 | -8.76023   | Copy loss    |
| AGS | chr5 | 106326001 | 110686800 | 0.0135705  | Copy neutral |
| AGS | chr5 | 110686801 | 110778000 | -0.0780295 | Copy neutral |
| AGS | chr5 | 110778001 | 110779200 | -1.66383   | Copy loss    |
| AGS | chr5 | 110779201 | 111584400 | -0.0633295 | Copy neutral |
| AGS | chr5 | 111584401 | 112346400 | 0.0182705  | Copy neutral |
| AGS | chr5 | 112346401 | 113005200 | 0.0834705  | Copy neutral |
| AGS | chr5 | 113005201 | 114254400 | -0.0527295 | Copy neutral |
| AGS | chr5 | 114254401 | 114261000 | -8.00103   | Copy loss    |
| AGS | chr5 | 114261001 | 131151000 | 0.0185705  | Copy neutral |
| AGS | chr5 | 131151001 | 132249000 | 0.130071   | Copy neutral |
| AGS | chr5 | 132249001 | 132447600 | -0.0213295 | Copy neutral |
| AGS | chr5 | 132447601 | 133333200 | 0.124371   | Copy neutral |
| AGS | chr5 | 133333201 | 133950600 | 0.0555705  | Copy neutral |
| AGS | chr5 | 133950601 | 134254200 | -0.0446295 | Copy neutral |
| AGS | chr5 | 134254201 | 135088200 | 0.128371   | Copy neutral |
| AGS | chr5 | 135088201 | 135094800 | 0.794171   | Copy gain    |
| AGS | chr5 | 135094801 | 136396200 | 0.148371   | Copy neutral |
| AGS | chr5 | 136396201 | 136495800 | 0.0211705  | Copy neutral |
| AGS | chr5 | 136495801 | 136497000 | -1.29273   | Copy loss    |
| AGS | chr5 | 136497001 | 136852200 | 0.0959705  | Copy neutral |
| AGS | chr5 | 136852201 | 136854600 | -0.418429  | Copy neutral |
| AGS | chr5 | 136854601 | 136856400 | -4.86923   | Copy loss    |
| AGS | chr5 | 136856401 | 138787074 | 0.0521705  | Copy neutral |
| AGS | chr5 | 138837073 | 145120200 | 0.0521705  | Copy neutral |
| AGS | chr5 | 145120201 | 145121400 | -8.76023   | Copy loss    |
| AGS | chr5 | 145121401 | 145204800 | 0.0268705  | Copy neutral |
| AGS | chr5 | 145204801 | 145510800 | 0.128971   | Copy neutral |
| AGS | chr5 | 145510801 | 145791600 | 0.0134705  | Copy neutral |
| AGS | chr5 | 145791601 | 145800600 | -0.435029  | Copy neutral |



|     |      |           |           |             |              |
|-----|------|-----------|-----------|-------------|--------------|
| AGS | chr5 | 145800601 | 147864000 | 0.0521705   | Copy neutral |
| AGS | chr5 | 147864001 | 148801800 | 0.154571    | Copy neutral |
| AGS | chr5 | 148801801 | 149029200 | 0.0733705   | Copy neutral |
| AGS | chr5 | 149029201 | 149031000 | -8.76023    | Copy loss    |
| AGS | chr5 | 149031001 | 149793600 | 0.121871    | Copy neutral |
| AGS | chr5 | 149793601 | 149867400 | -0.0502295  | Copy neutral |
| AGS | chr5 | 149867401 | 150177600 | 0.112671    | Copy neutral |
| AGS | chr5 | 150177601 | 150181200 | -0.755029   | Copy loss    |
| AGS | chr5 | 150181201 | 150202500 | 0.156771    | Copy neutral |
| AGS | chr5 | 150202501 | 150222600 | -0.789929   | Copy loss    |
| AGS | chr5 | 150222601 | 150367200 | 0.231071    | Copy neutral |
| AGS | chr5 | 150367201 | 150582600 | 0.0917705   | Copy neutral |
| AGS | chr5 | 150582601 | 150583800 | -1.89633    | Copy loss    |
| AGS | chr5 | 150583801 | 150790200 | 0.105071    | Copy neutral |
| AGS | chr5 | 150790201 | 150792600 | -8.76023    | Copy loss    |
| AGS | chr5 | 150792601 | 151143000 | 0.0604705   | Copy neutral |
| AGS | chr5 | 151143001 | 151144200 | -1.38363    | Copy loss    |
| AGS | chr5 | 151144201 | 152076000 | 0.0634705   | Copy neutral |
| AGS | chr5 | 152076001 | 152077200 | -4.82403    | Copy loss    |
| AGS | chr5 | 152077201 | 153217200 | -0.0219295  | Copy neutral |
| AGS | chr5 | 153217201 | 153220800 | -0.721629   | Copy loss    |
| AGS | chr5 | 153220801 | 153909000 | 0.0738705   | Copy neutral |
| AGS | chr5 | 153909001 | 154275000 | -0.00682946 | Copy neutral |
| AGS | chr5 | 154275001 | 154650600 | 0.0645705   | Copy neutral |
| AGS | chr5 | 154650601 | 154923600 | -0.0147295  | Copy neutral |
| AGS | chr5 | 154923601 | 155138728 | -0.136829   | Copy neutral |
| AGS | chr5 | 155188727 | 156582000 | -0.136829   | Copy neutral |
| AGS | chr5 | 156582001 | 160581600 | 0.0177705   | Copy neutral |
| AGS | chr5 | 160581601 | 162866400 | -0.120829   | Copy neutral |
| AGS | chr5 | 162866401 | 164084400 | -0.0421295  | Copy neutral |
| AGS | chr5 | 164084401 | 166579200 | -0.161329   | Copy neutral |
| AGS | chr5 | 166579201 | 177334200 | 0.0511705   | Copy neutral |
| AGS | chr5 | 177334201 | 177348000 | -3.40143    | Copy loss    |
| AGS | chr5 | 177348001 | 180375900 | 0.00327054  | Copy neutral |
| AGS | chr5 | 180375901 | 180430200 | -8.75143    | Copy loss    |
| AGS | chr5 | 180430201 | 180905261 | 0.0253705   | Copy neutral |
| AGS | chr5 | 180915260 | 180915260 | 0.0253705   | Copy neutral |
| AGS | chr6 | 60000     | 256800    | 0.603871    | Copy gain    |
| AGS | chr6 | 256801    | 289200    | 1.33647     | Copy gain    |
| AGS | chr6 | 289201    | 382200    | 1.08057     | Copy gain    |
| AGS | chr6 | 382201    | 4776000   | 0.618871    | Copy gain    |
| AGS | chr6 | 4776001   | 4777200   | -8.76023    | Copy loss    |
| AGS | chr6 | 4777201   | 20743800  | 0.577171    | Copy gain    |
| AGS | chr6 | 20743801  | 21573600  | -0.0164295  | Copy neutral |
| AGS | chr6 | 21573601  | 21867600  | -0.134229   | Copy neutral |
| AGS | chr6 | 21867601  | 22051200  | -0.0574295  | Copy neutral |
| AGS | chr6 | 22051201  | 22054200  | -8.76023    | Copy loss    |
| AGS | chr6 | 22054201  | 24162600  | -0.101529   | Copy neutral |
| AGS | chr6 | 24162601  | 24777000  | -0.00762946 | Copy neutral |
| AGS | chr6 | 24777001  | 25892400  | 0.0556705   | Copy neutral |
| AGS | chr6 | 25892401  | 26017200  | -0.0218295  | Copy neutral |
| AGS | chr6 | 26017201  | 26361000  | -0.109729   | Copy neutral |

|     |      |          |          |            |              |
|-----|------|----------|----------|------------|--------------|
| AGS | chr6 | 26361001 | 26500200 | 0.0690705  | Copy neutral |
| AGS | chr6 | 26500201 | 26672400 | -0.0604295 | Copy neutral |
| AGS | chr6 | 26672401 | 26718600 | 1.13537    | Copy gain    |
| AGS | chr6 | 26718601 | 26746800 | -0.609429  | Copy loss    |
| AGS | chr6 | 26746801 | 26754000 | -5.35633   | Copy loss    |
| AGS | chr6 | 26754001 | 26997000 | 0.176471   | Copy neutral |
| AGS | chr6 | 26997001 | 27274800 | -0.128329  | Copy neutral |
| AGS | chr6 | 27274801 | 27490800 | 0.0104705  | Copy neutral |
| AGS | chr6 | 27490801 | 27886200 | -0.135129  | Copy neutral |
| AGS | chr6 | 27886201 | 28560600 | 0.0474705  | Copy neutral |
| AGS | chr6 | 28560601 | 28908000 | -0.0802295 | Copy neutral |
| AGS | chr6 | 28908001 | 29844000 | 0.0775705  | Copy neutral |
| AGS | chr6 | 29844001 | 29848800 | -7.50343   | Copy loss    |
| AGS | chr6 | 29848801 | 29899800 | 0.00627054 | Copy neutral |
| AGS | chr6 | 29899801 | 29901300 | -8.76023   | Copy loss    |
| AGS | chr6 | 29901301 | 29948400 | -0.0383295 | Copy neutral |
| AGS | chr6 | 29948401 | 30411000 | 0.121971   | Copy neutral |
| AGS | chr6 | 30411001 | 31236000 | 0.0159705  | Copy neutral |
| AGS | chr6 | 31236001 | 31237200 | -4.99443   | Copy loss    |
| AGS | chr6 | 31237201 | 31285800 | 0.106471   | Copy neutral |
| AGS | chr6 | 31285801 | 31292400 | -0.659829  | Copy loss    |
| AGS | chr6 | 31292401 | 31293600 | -8.76023   | Copy loss    |
| AGS | chr6 | 31293601 | 31311000 | -0.544329  | Copy loss    |
| AGS | chr6 | 31311001 | 31395600 | 0.0549705  | Copy neutral |
| AGS | chr6 | 31395601 | 31396800 | -8.76023   | Copy loss    |
| AGS | chr6 | 31396801 | 32454600 | 0.0126705  | Copy neutral |
| AGS | chr6 | 32454601 | 32486400 | -8.56783   | Copy loss    |
| AGS | chr6 | 32486401 | 32500200 | -4.36133   | Copy loss    |
| AGS | chr6 | 32500201 | 32541000 | -7.27083   | Copy loss    |
| AGS | chr6 | 32541001 | 32559600 | -1.37733   | Copy loss    |
| AGS | chr6 | 32559601 | 32567400 | -0.306729  | Copy neutral |
| AGS | chr6 | 32567401 | 32577600 | -1.01923   | Copy loss    |
| AGS | chr6 | 32577601 | 32603400 | -0.0593295 | Copy neutral |
| AGS | chr6 | 32603401 | 32613600 | -2.12733   | Copy loss    |
| AGS | chr6 | 32613601 | 32625000 | -6.50483   | Copy loss    |
| AGS | chr6 | 32625001 | 32635800 | -2.17793   | Copy loss    |
| AGS | chr6 | 32635801 | 32648400 | -0.857529  | Copy loss    |
| AGS | chr6 | 32648401 | 32778600 | -0.0308295 | Copy neutral |
| AGS | chr6 | 32778601 | 32779800 | -5.40363   | Copy loss    |
| AGS | chr6 | 32779801 | 33099600 | 0.102371   | Copy neutral |
| AGS | chr6 | 33099601 | 33583800 | -0.0354295 | Copy neutral |
| AGS | chr6 | 33583801 | 33585600 | -8.76023   | Copy loss    |
| AGS | chr6 | 33585601 | 34108800 | 0.0635705  | Copy neutral |
| AGS | chr6 | 34108801 | 34233000 | -0.0971295 | Copy neutral |
| AGS | chr6 | 34233001 | 34273200 | 0.0140705  | Copy neutral |
| AGS | chr6 | 34273201 | 34309800 | 0.160771   | Copy neutral |
| AGS | chr6 | 34309801 | 34473000 | -0.0302295 | Copy neutral |
| AGS | chr6 | 34473001 | 34617600 | 0.115771   | Copy neutral |
| AGS | chr6 | 34617601 | 34801800 | -0.0482295 | Copy neutral |
| AGS | chr6 | 34801801 | 35266800 | 0.101271   | Copy neutral |
| AGS | chr6 | 35266801 | 35626800 | 0.0156705  | Copy neutral |
| AGS | chr6 | 35626801 | 35629200 | -8.76023   | Copy loss    |

|     |      |          |          |            |              |
|-----|------|----------|----------|------------|--------------|
| AGS | chr6 | 35629201 | 48162600 | 0.0657705  | Copy neutral |
| AGS | chr6 | 48162601 | 51613200 | -0.0541295 | Copy neutral |
| AGS | chr6 | 51613201 | 52551000 | 0.0722705  | Copy neutral |
| AGS | chr6 | 52551001 | 52788000 | 0.174571   | Copy neutral |
| AGS | chr6 | 52788001 | 53928600 | 0.0587705  | Copy neutral |
| AGS | chr6 | 53928601 | 53934600 | -8.68153   | Copy loss    |
| AGS | chr6 | 53934601 | 55407600 | -0.0128295 | Copy neutral |
| AGS | chr6 | 55407601 | 55408800 | -4.91463   | Copy loss    |
| AGS | chr6 | 55408801 | 55492200 | 0.0395705  | Copy neutral |
| AGS | chr6 | 55492201 | 55493400 | -1.26493   | Copy loss    |
| AGS | chr6 | 55493401 | 55962600 | 0.0658705  | Copy neutral |
| AGS | chr6 | 55962601 | 55963800 | -5.86413   | Copy loss    |
| AGS | chr6 | 55963801 | 57201300 | 0.0574705  | Copy neutral |
| AGS | chr6 | 57201301 | 57285000 | 0.948471   | Copy gain    |
| AGS | chr6 | 57285001 | 57289200 | 0.0520705  | Copy neutral |
| AGS | chr6 | 57289201 | 57297000 | 0.931271   | Copy gain    |
| AGS | chr6 | 57297001 | 57301200 | -0.144029  | Copy neutral |
| AGS | chr6 | 57301201 | 57316200 | 0.857871   | Copy gain    |
| AGS | chr6 | 57316201 | 57322800 | 0.352171   | Copy neutral |
| AGS | chr6 | 57322801 | 57369000 | 0.842271   | Copy gain    |
| AGS | chr6 | 57369001 | 57567600 | 1.33127    | Copy gain    |
| AGS | chr6 | 57567601 | 57573600 | 0.187971   | Copy neutral |
| AGS | chr6 | 57573601 | 57583800 | 0.873871   | Copy gain    |
| AGS | chr6 | 57583801 | 57590400 | -0.119829  | Copy neutral |
| AGS | chr6 | 57590401 | 57597900 | 0.726471   | Copy gain    |
| AGS | chr6 | 57597901 | 57603600 | 0.177871   | Copy neutral |
| AGS | chr6 | 57603601 | 57608400 | 0.626771   | Copy gain    |
| AGS | chr6 | 57608401 | 58087660 | -0.0860295 | Copy neutral |
| AGS | chr6 | 58137659 | 58270200 | 0.221971   | Copy neutral |
| AGS | chr6 | 58270201 | 58773600 | -0.0155295 | Copy neutral |
| AGS | chr6 | 58773601 | 58776000 | 0.914171   | Copy gain    |
| AGS | chr6 | 58776001 | 58780167 | 9.45517    | Copy gain    |
| AGS | chr6 | 61880166 | 61915200 | 0.171371   | Copy neutral |
| AGS | chr6 | 61915201 | 62128590 | -0.106729  | Copy neutral |
| AGS | chr6 | 62178589 | 63373800 | -0.106729  | Copy neutral |
| AGS | chr6 | 63373801 | 64666800 | 0.0343705  | Copy neutral |
| AGS | chr6 | 64666801 | 64668000 | -6.32193   | Copy loss    |
| AGS | chr6 | 64668001 | 65346900 | 0.0110705  | Copy neutral |
| AGS | chr6 | 65346901 | 65349900 | -8.36683   | Copy loss    |
| AGS | chr6 | 65349901 | 66179400 | -0.0482295 | Copy neutral |
| AGS | chr6 | 66179401 | 70191000 | -0.138029  | Copy neutral |
| AGS | chr6 | 70191001 | 70192200 | -6.23343   | Copy loss    |
| AGS | chr6 | 70192201 | 70392000 | -0.101829  | Copy neutral |
| AGS | chr6 | 70392001 | 70634400 | -0.0357295 | Copy neutral |
| AGS | chr6 | 70634401 | 71277000 | 0.118071   | Copy neutral |
| AGS | chr6 | 71277001 | 71403600 | -0.0192295 | Copy neutral |
| AGS | chr6 | 71403601 | 71856000 | 0.0658705  | Copy neutral |
| AGS | chr6 | 71856001 | 73419000 | -0.0192295 | Copy neutral |
| AGS | chr6 | 73419001 | 73858800 | 0.0966705  | Copy neutral |
| AGS | chr6 | 73858801 | 74406600 | -0.0572295 | Copy neutral |
| AGS | chr6 | 74406601 | 74592000 | 0.125871   | Copy neutral |
| AGS | chr6 | 74592001 | 74602200 | -8.66763   | Copy loss    |

|     |      |           |           |              |              |
|-----|------|-----------|-----------|--------------|--------------|
| AGS | chr6 | 74602201  | 76431000  | 0.0543705    | Copy neutral |
| AGS | chr6 | 76431001  | 76521000  | -0.111429    | Copy neutral |
| AGS | chr6 | 76521001  | 77097600  | 0.0181705    | Copy neutral |
| AGS | chr6 | 77097601  | 77102100  | -7.72363     | Copy loss    |
| AGS | chr6 | 77102101  | 79631400  | -0.0554295   | Copy neutral |
| AGS | chr6 | 79631401  | 91639800  | 0.0222705    | Copy neutral |
| AGS | chr6 | 91639801  | 95680544  | -0.0552295   | Copy neutral |
| AGS | chr6 | 95830543  | 103737600 | -0.0552295   | Copy neutral |
| AGS | chr6 | 103737601 | 103762800 | -8.74153     | Copy loss    |
| AGS | chr6 | 103762801 | 120669600 | 0.0273705    | Copy neutral |
| AGS | chr6 | 120669601 | 121093200 | -0.0355295   | Copy neutral |
| AGS | chr6 | 121093201 | 121094400 | 1.56347      | Copy gain    |
| AGS | chr6 | 121094401 | 121720200 | -0.0306295   | Copy neutral |
| AGS | chr6 | 121720201 | 121821600 | -0.217829    | Copy neutral |
| AGS | chr6 | 121821601 | 123973200 | -0.0384295   | Copy neutral |
| AGS | chr6 | 123973201 | 125100600 | -0.107529    | Copy neutral |
| AGS | chr6 | 125100601 | 125303400 | -0.0247295   | Copy neutral |
| AGS | chr6 | 125303401 | 132707400 | 0.0488705    | Copy neutral |
| AGS | chr6 | 132707401 | 132712200 | -8.66193     | Copy loss    |
| AGS | chr6 | 132712201 | 152458800 | 0.0475705    | Copy neutral |
| AGS | chr6 | 152458801 | 153297600 | -0.0249295   | Copy neutral |
| AGS | chr6 | 153297601 | 154248600 | -0.116529    | Copy neutral |
| AGS | chr6 | 154248601 | 154620000 | -0.0326295   | Copy neutral |
| AGS | chr6 | 154620001 | 154621200 | -8.76023     | Copy loss    |
| AGS | chr6 | 154621201 | 157098600 | 7.05358E-05  | Copy neutral |
| AGS | chr6 | 157098601 | 157100400 | -8.76023     | Copy loss    |
| AGS | chr6 | 157100401 | 157559468 | 0.0255705    | Copy neutral |
| AGS | chr6 | 157609467 | 157641301 | 0.0255705    | Copy neutral |
| AGS | chr6 | 157691300 | 160086600 | 0.0255705    | Copy neutral |
| AGS | chr6 | 160086601 | 160088400 | -8.76023     | Copy loss    |
| AGS | chr6 | 160088401 | 160348200 | 0.00387054   | Copy neutral |
| AGS | chr6 | 160348201 | 160349400 | -5.12273     | Copy loss    |
| AGS | chr6 | 160349401 | 161308800 | -0.000129464 | Copy neutral |
| AGS | chr6 | 161308801 | 163834800 | -0.201929    | Copy neutral |
| AGS | chr6 | 163834801 | 163836000 | -8.76023     | Copy loss    |
| AGS | chr6 | 163836001 | 165753000 | -0.164129    | Copy neutral |
| AGS | chr6 | 165753001 | 167488200 | -0.0227295   | Copy neutral |
| AGS | chr6 | 167488201 | 167489400 | -8.76023     | Copy loss    |
| AGS | chr6 | 167489401 | 167942074 | 0.0653705    | Copy neutral |
| AGS | chr6 | 168042073 | 168333600 | 0.0653705    | Copy neutral |
| AGS | chr6 | 168333601 | 168376200 | 1.10797      | Copy gain    |
| AGS | chr6 | 168376201 | 168379200 | 0.361071     | Copy neutral |
| AGS | chr6 | 168379201 | 168395400 | 0.862671     | Copy gain    |
| AGS | chr6 | 168395401 | 168403200 | 0.451571     | Copy gain    |
| AGS | chr6 | 168403201 | 168407400 | 0.959071     | Copy gain    |
| AGS | chr6 | 168407401 | 168412800 | 1.35467      | Copy gain    |
| AGS | chr6 | 168412801 | 168442200 | 0.902371     | Copy gain    |
| AGS | chr6 | 168442201 | 168468000 | 0.546371     | Copy gain    |
| AGS | chr6 | 168468001 | 168478800 | 0.855071     | Copy gain    |
| AGS | chr6 | 168478801 | 168502800 | 0.568671     | Copy gain    |
| AGS | chr6 | 168502801 | 168525600 | 0.989471     | Copy gain    |
| AGS | chr6 | 168525601 | 168537600 | 0.652571     | Copy gain    |

|     |      |           |           |             |              |
|-----|------|-----------|-----------|-------------|--------------|
| AGS | chr6 | 168537601 | 168541200 | 0.985771    | Copy gain    |
| AGS | chr6 | 168541201 | 168546600 | 1.30967     | Copy gain    |
| AGS | chr6 | 168546601 | 168572400 | 0.957771    | Copy gain    |
| AGS | chr6 | 168572401 | 168578400 | 1.28777     | Copy gain    |
| AGS | chr6 | 168578401 | 168597600 | 0.826871    | Copy gain    |
| AGS | chr6 | 168597601 | 170279973 | 0.0383705   | Copy neutral |
| AGS | chr6 | 170329972 | 171001200 | 0.0383705   | Copy neutral |
| AGS | chr6 | 171001201 | 171055068 | 0.829671    | Copy gain    |
| AGS | chr6 | 171115067 | 171115067 | 0.829671    | Copy gain    |
| AGS | chr7 | 10000     | 232485    | -0.0361295  | Copy neutral |
| AGS | chr7 | 282484    | 9528000   | -0.0361295  | Copy neutral |
| AGS | chr7 | 9528001   | 9816000   | -1.23113    | Copy loss    |
| AGS | chr7 | 9816001   | 21133200  | -0.0333295  | Copy neutral |
| AGS | chr7 | 21133201  | 32320200  | 0.0611705   | Copy neutral |
| AGS | chr7 | 32320201  | 32657400  | -0.0615295  | Copy neutral |
| AGS | chr7 | 32657401  | 32775000  | 0.114271    | Copy neutral |
| AGS | chr7 | 32775001  | 32777700  | -6.70823    | Copy loss    |
| AGS | chr7 | 32777701  | 35350200  | 0.0472705   | Copy neutral |
| AGS | chr7 | 35350201  | 35351400  | -6.04223    | Copy loss    |
| AGS | chr7 | 35351401  | 35421600  | -0.0210295  | Copy neutral |
| AGS | chr7 | 35421601  | 37209000  | 0.0643705   | Copy neutral |
| AGS | chr7 | 37209001  | 38388600  | -0.0100295  | Copy neutral |
| AGS | chr7 | 38388601  | 38397600  | -0.890929   | Copy loss    |
| AGS | chr7 | 38397601  | 39127200  | -0.0701295  | Copy neutral |
| AGS | chr7 | 39127201  | 40059600  | 0.0318705   | Copy neutral |
| AGS | chr7 | 40059601  | 40287600  | -0.134029   | Copy neutral |
| AGS | chr7 | 40287601  | 40390800  | -1.19873    | Copy loss    |
| AGS | chr7 | 40390801  | 40791600  | -0.0571295  | Copy neutral |
| AGS | chr7 | 40791601  | 41356800  | -0.00182946 | Copy neutral |
| AGS | chr7 | 41356801  | 43117800  | -0.0911295  | Copy neutral |
| AGS | chr7 | 43117801  | 46754400  | 0.0527705   | Copy neutral |
| AGS | chr7 | 46754401  | 46791600  | -0.990329   | Copy loss    |
| AGS | chr7 | 46791601  | 50370632  | 0.0289705   | Copy neutral |
| AGS | chr7 | 50410631  | 55829400  | 0.0289705   | Copy neutral |
| AGS | chr7 | 55829401  | 57065400  | -0.154329   | Copy neutral |
| AGS | chr7 | 57065401  | 57068400  | -4.85283    | Copy loss    |
| AGS | chr7 | 57068401  | 57605400  | -0.200129   | Copy neutral |
| AGS | chr7 | 57605401  | 57636000  | 0.558471    | Copy gain    |
| AGS | chr7 | 57636001  | 57648600  | 0.0484705   | Copy neutral |
| AGS | chr7 | 57648601  | 57683100  | 0.518971    | Copy gain    |
| AGS | chr7 | 57683101  | 57699600  | 1.86477     | Copy gain    |
| AGS | chr7 | 57699601  | 57727200  | 0.360471    | Copy neutral |
| AGS | chr7 | 57727201  | 57748200  | 1.09347     | Copy gain    |
| AGS | chr7 | 57748201  | 57766200  | 0.308771    | Copy neutral |
| AGS | chr7 | 57766201  | 57771000  | 1.22627     | Copy gain    |
| AGS | chr7 | 57771001  | 57802200  | 0.394871    | Copy neutral |
| AGS | chr7 | 57802201  | 57883800  | -0.146429   | Copy neutral |
| AGS | chr7 | 57883801  | 57966000  | 0.558271    | Copy gain    |
| AGS | chr7 | 57966001  | 57991800  | -0.192529   | Copy neutral |
| AGS | chr7 | 57991801  | 57997800  | 1.65537     | Copy gain    |
| AGS | chr7 | 57997801  | 58053600  | 0.0228705   | Copy neutral |
| AGS | chr7 | 58053601  | 58054332  | 1.24617     | Copy gain    |

|     |      |          |          |             |              |
|-----|------|----------|----------|-------------|--------------|
| AGS | chr7 | 61054331 | 61090200 | 1.24617     | Copy gain    |
| AGS | chr7 | 61090201 | 61111800 | 0.150071    | Copy neutral |
| AGS | chr7 | 61111801 | 61205100 | -2.56303    | Copy loss    |
| AGS | chr7 | 61205101 | 61310514 | 0.139371    | Copy neutral |
| AGS | chr7 | 61360513 | 61460466 | 0.139371    | Copy neutral |
| AGS | chr7 | 61510465 | 61526400 | 0.139371    | Copy neutral |
| AGS | chr7 | 61526401 | 61677021 | 0.839671    | Copy gain    |
| AGS | chr7 | 61727020 | 61803000 | 0.839671    | Copy gain    |
| AGS | chr7 | 61803001 | 61820400 | 2.64197     | Copy gain    |
| AGS | chr7 | 61820401 | 61822200 | -0.137929   | Copy neutral |
| AGS | chr7 | 61822201 | 61834200 | 2.03617     | Copy gain    |
| AGS | chr7 | 61834201 | 61849200 | 0.771671    | Copy gain    |
| AGS | chr7 | 61849201 | 61857600 | -0.0721295  | Copy neutral |
| AGS | chr7 | 61857601 | 61917158 | 0.837971    | Copy gain    |
| AGS | chr7 | 61967157 | 61971000 | 8.87297     | Copy gain    |
| AGS | chr7 | 61971001 | 61980600 | 1.80377     | Copy gain    |
| AGS | chr7 | 61980601 | 64687200 | -0.140529   | Copy neutral |
| AGS | chr7 | 64687201 | 64689000 | -8.76023    | Copy loss    |
| AGS | chr7 | 64689001 | 64717200 | -0.0745295  | Copy neutral |
| AGS | chr7 | 64717201 | 64724100 | -0.771829   | Copy loss    |
| AGS | chr7 | 64724101 | 64953600 | 0.000270536 | Copy neutral |
| AGS | chr7 | 64953601 | 64965000 | 0.928971    | Copy gain    |
| AGS | chr7 | 64965001 | 64972500 | 0.230771    | Copy neutral |
| AGS | chr7 | 64972501 | 64976400 | -6.01013    | Copy loss    |
| AGS | chr7 | 64976401 | 67097400 | -0.0135295  | Copy neutral |
| AGS | chr7 | 67097401 | 69067200 | -0.268329   | Copy neutral |
| AGS | chr7 | 69067201 | 69592200 | -0.0459295  | Copy neutral |
| AGS | chr7 | 69592201 | 70036800 | 0.0646705   | Copy neutral |
| AGS | chr7 | 70036801 | 70421400 | -0.0729295  | Copy neutral |
| AGS | chr7 | 70421401 | 70426200 | -8.66193    | Copy loss    |
| AGS | chr7 | 70426201 | 70764600 | -0.184229   | Copy neutral |
| AGS | chr7 | 70764601 | 70789800 | -1.17943    | Copy loss    |
| AGS | chr7 | 70789801 | 72013200 | -0.191729   | Copy neutral |
| AGS | chr7 | 72013201 | 73003200 | 0.0144705   | Copy neutral |
| AGS | chr7 | 73003201 | 73004400 | -5.64173    | Copy loss    |
| AGS | chr7 | 73004401 | 74715725 | -0.0462295  | Copy neutral |
| AGS | chr7 | 74765724 | 76144800 | -0.0462295  | Copy neutral |
| AGS | chr7 | 76144801 | 76157100 | -4.30303    | Copy loss    |
| AGS | chr7 | 76157101 | 76242300 | 0.258571    | Copy neutral |
| AGS | chr7 | 76242301 | 76247100 | -1.02633    | Copy loss    |
| AGS | chr7 | 76247101 | 76261200 | -0.198529   | Copy neutral |
| AGS | chr7 | 76261201 | 76263900 | -1.10053    | Copy loss    |
| AGS | chr7 | 76263901 | 76279200 | 0.0249705   | Copy neutral |
| AGS | chr7 | 76279201 | 76573200 | 0.316671    | Copy neutral |
| AGS | chr7 | 76573201 | 76659300 | 0.0141705   | Copy neutral |
| AGS | chr7 | 76659301 | 76819200 | 0.284271    | Copy neutral |
| AGS | chr7 | 76819201 | 77109600 | 0.105871    | Copy neutral |
| AGS | chr7 | 77109601 | 91809600 | -0.0404295  | Copy neutral |
| AGS | chr7 | 91809601 | 91817700 | 0.370871    | Copy neutral |
| AGS | chr7 | 91817701 | 92416800 | 0.0598705   | Copy neutral |
| AGS | chr7 | 92416801 | 92946000 | 0.130871    | Copy neutral |
| AGS | chr7 | 92946001 | 93327000 | 0.0435705   | Copy neutral |

|     |      |           |           |             |              |
|-----|------|-----------|-----------|-------------|--------------|
| AGS | chr7 | 93327001  | 93331800  | -8.51343    | Copy loss    |
| AGS | chr7 | 93331801  | 100556044 | 0.0181705   | Copy neutral |
| AGS | chr7 | 100606043 | 104977800 | 0.0181705   | Copy neutral |
| AGS | chr7 | 104977801 | 105110400 | -1.10453    | Copy loss    |
| AGS | chr7 | 105110401 | 105372600 | -0.0696295  | Copy neutral |
| AGS | chr7 | 105372601 | 106546800 | 0.0920705   | Copy neutral |
| AGS | chr7 | 106546801 | 107042400 | -0.0311295  | Copy neutral |
| AGS | chr7 | 107042401 | 108475800 | 0.0691705   | Copy neutral |
| AGS | chr7 | 108475801 | 109437000 | -0.0932295  | Copy neutral |
| AGS | chr7 | 109437001 | 109441200 | -7.97343    | Copy loss    |
| AGS | chr7 | 109441201 | 109453800 | -8.76023    | Copy loss    |
| AGS | chr7 | 109453801 | 110182200 | -0.0601295  | Copy neutral |
| AGS | chr7 | 110182201 | 110188200 | -1.11553    | Copy loss    |
| AGS | chr7 | 110188201 | 110272800 | -0.0412295  | Copy neutral |
| AGS | chr7 | 110272801 | 110275800 | -0.557929   | Copy loss    |
| AGS | chr7 | 110275801 | 110368200 | -0.0469295  | Copy neutral |
| AGS | chr7 | 110368201 | 110455500 | -0.315229   | Copy neutral |
| AGS | chr7 | 110455501 | 110653800 | -0.125729   | Copy neutral |
| AGS | chr7 | 110653801 | 110778000 | -1.24073    | Copy loss    |
| AGS | chr7 | 110778001 | 110789400 | -0.659129   | Copy loss    |
| AGS | chr7 | 110789401 | 111008400 | -0.107729   | Copy neutral |
| AGS | chr7 | 111008401 | 111012600 | -1.16353    | Copy loss    |
| AGS | chr7 | 111012601 | 111042000 | -0.0640295  | Copy neutral |
| AGS | chr7 | 111042001 | 111043800 | -0.750429   | Copy loss    |
| AGS | chr7 | 111043801 | 111072600 | -0.0317295  | Copy neutral |
| AGS | chr7 | 111072601 | 111199200 | -1.15423    | Copy loss    |
| AGS | chr7 | 111199201 | 111851400 | -0.0716295  | Copy neutral |
| AGS | chr7 | 111851401 | 111934200 | 0.0253705   | Copy neutral |
| AGS | chr7 | 111934201 | 111940800 | 0.452571    | Copy gain    |
| AGS | chr7 | 111940801 | 112207800 | 0.0184705   | Copy neutral |
| AGS | chr7 | 112207801 | 112209600 | -0.920829   | Copy loss    |
| AGS | chr7 | 112209601 | 112425000 | 0.0572705   | Copy neutral |
| AGS | chr7 | 112425001 | 112437000 | -0.132829   | Copy neutral |
| AGS | chr7 | 112437001 | 112438200 | -8.76023    | Copy loss    |
| AGS | chr7 | 112438201 | 130154524 | -0.00392946 | Copy neutral |
| AGS | chr7 | 130254523 | 133702800 | -0.00392946 | Copy neutral |
| AGS | chr7 | 133702801 | 133734600 | -1.05943    | Copy loss    |
| AGS | chr7 | 133734601 | 133785000 | 0.00387054  | Copy neutral |
| AGS | chr7 | 133785001 | 133787400 | -0.864129   | Copy loss    |
| AGS | chr7 | 133787401 | 133788600 | -8.36683    | Copy loss    |
| AGS | chr7 | 133788601 | 133798200 | -1.02083    | Copy loss    |
| AGS | chr7 | 133798201 | 133835400 | -0.0185295  | Copy neutral |
| AGS | chr7 | 133835401 | 135138000 | 0.0858705   | Copy neutral |
| AGS | chr7 | 135138001 | 135254400 | -0.0633295  | Copy neutral |
| AGS | chr7 | 135254401 | 135256200 | -0.903229   | Copy loss    |
| AGS | chr7 | 135256201 | 135582000 | -0.00692946 | Copy neutral |
| AGS | chr7 | 135582001 | 135583200 | -2.01523    | Copy loss    |
| AGS | chr7 | 135583201 | 135816000 | -0.0100295  | Copy neutral |
| AGS | chr7 | 135816001 | 137193000 | -0.137129   | Copy neutral |
| AGS | chr7 | 137193001 | 139379378 | 0.0182705   | Copy neutral |
| AGS | chr7 | 139404377 | 142048196 | 0.0182705   | Copy neutral |
| AGS | chr7 | 142098195 | 142276198 | 0.0182705   | Copy neutral |

|     |      |           |           |             |              |
|-----|------|-----------|-----------|-------------|--------------|
| AGS | chr7 | 142326197 | 143291100 | 0.0182705   | Copy neutral |
| AGS | chr7 | 143291101 | 143310000 | -4.69473    | Copy loss    |
| AGS | chr7 | 143310001 | 143347898 | 0.00837054  | Copy neutral |
| AGS | chr7 | 143397897 | 143542800 | 0.00837054  | Copy neutral |
| AGS | chr7 | 143542801 | 143552400 | 0.938771    | Copy gain    |
| AGS | chr7 | 143552401 | 143923800 | 0.0618705   | Copy neutral |
| AGS | chr7 | 143923801 | 144015900 | -0.897829   | Copy loss    |
| AGS | chr7 | 144015901 | 144372600 | -0.0270295  | Copy neutral |
| AGS | chr7 | 144372601 | 147313800 | -0.139429   | Copy neutral |
| AGS | chr7 | 147313801 | 147696600 | -0.0310295  | Copy neutral |
| AGS | chr7 | 147696601 | 152098800 | 0.0431705   | Copy neutral |
| AGS | chr7 | 152098801 | 152113800 | 1.67267     | Copy gain    |
| AGS | chr7 | 152113801 | 152124000 | -0.00852946 | Copy neutral |
| AGS | chr7 | 152124001 | 154270635 | -0.103629   | Copy neutral |
| AGS | chr7 | 154370634 | 155250600 | -0.103629   | Copy neutral |
| AGS | chr7 | 155250601 | 155251800 | -8.76023    | Copy loss    |
| AGS | chr7 | 155251801 | 158379600 | 0.00777054  | Copy neutral |
| AGS | chr7 | 158379601 | 158380800 | -8.76023    | Copy loss    |
| AGS | chr7 | 158380801 | 158390400 | 0.0519705   | Copy neutral |
| AGS | chr7 | 158390401 | 158413800 | 0.484471    | Copy gain    |
| AGS | chr7 | 158413801 | 158679000 | -0.00902946 | Copy neutral |
| AGS | chr7 | 158679001 | 158685600 | 0.446871    | Copy neutral |
| AGS | chr7 | 158685601 | 158697600 | 0.833971    | Copy gain    |
| AGS | chr7 | 158697601 | 158707800 | 0.480971    | Copy gain    |
| AGS | chr7 | 158707801 | 158710200 | 1.89787     | Copy gain    |
| AGS | chr7 | 158710201 | 158798400 | 0.518871    | Copy gain    |
| AGS | chr7 | 158798401 | 159128664 | 0.0205705   | Copy neutral |
| AGS | chr7 | 159138663 | 159138663 | 0.0205705   | Copy neutral |
| AGS | chr8 | 10000     | 594600    | -0.903229   | Copy loss    |
| AGS | chr8 | 594601    | 599400    | -8.76023    | Copy loss    |
| AGS | chr8 | 599401    | 2354400   | -0.911829   | Copy loss    |
| AGS | chr8 | 2354401   | 3994800   | -0.257629   | Copy neutral |
| AGS | chr8 | 3994801   | 3996000   | -3.21803    | Copy loss    |
| AGS | chr8 | 3996001   | 4123200   | -0.260229   | Copy neutral |
| AGS | chr8 | 4123201   | 4124400   | -8.76023    | Copy loss    |
| AGS | chr8 | 4124401   | 6826200   | -0.140229   | Copy neutral |
| AGS | chr8 | 6826201   | 6828000   | -8.76023    | Copy loss    |
| AGS | chr8 | 6828001   | 6991800   | 0.0747705   | Copy neutral |
| AGS | chr8 | 6991801   | 6995400   | -8.13083    | Copy loss    |
| AGS | chr8 | 6995401   | 7047900   | 0.0556705   | Copy neutral |
| AGS | chr8 | 7047901   | 7060200   | -5.70713    | Copy loss    |
| AGS | chr8 | 7060201   | 7119900   | -0.803629   | Copy loss    |
| AGS | chr8 | 7119901   | 7209600   | 0.237471    | Copy neutral |
| AGS | chr8 | 7209601   | 7213200   | -0.859429   | Copy loss    |
| AGS | chr8 | 7213201   | 7228200   | -7.79523    | Copy loss    |
| AGS | chr8 | 7228201   | 7255800   | -2.16603    | Copy loss    |
| AGS | chr8 | 7255801   | 7409100   | 0.718171    | Copy gain    |
| AGS | chr8 | 7409101   | 7474650   | -0.406829   | Copy neutral |
| AGS | chr8 | 7524649   | 7647600   | -0.406829   | Copy neutral |
| AGS | chr8 | 7647601   | 7805700   | 0.950271    | Copy gain    |
| AGS | chr8 | 7805701   | 7880400   | -2.01613    | Copy loss    |
| AGS | chr8 | 7880401   | 7944000   | -0.343029   | Copy neutral |



|     |      |          |          |            |              |
|-----|------|----------|----------|------------|--------------|
| AGS | chr8 | 7944001  | 7949400  | -6.56473   | Copy loss    |
| AGS | chr8 | 7949401  | 7986600  | -2.59833   | Copy loss    |
| AGS | chr8 | 7986601  | 8066400  | 0.714871   | Copy gain    |
| AGS | chr8 | 8066401  | 8072100  | -2.02863   | Copy loss    |
| AGS | chr8 | 8072101  | 8086800  | -6.69383   | Copy loss    |
| AGS | chr8 | 8086801  | 11962500 | 0.0403705  | Copy neutral |
| AGS | chr8 | 11962501 | 12010500 | 1.19357    | Copy gain    |
| AGS | chr8 | 12010501 | 12087900 | 0.648271   | Copy gain    |
| AGS | chr8 | 12087901 | 12091855 | -0.154029  | Copy neutral |
| AGS | chr8 | 12141854 | 12170400 | -0.154029  | Copy neutral |
| AGS | chr8 | 12170401 | 12201300 | -5.42373   | Copy loss    |
| AGS | chr8 | 12201301 | 12391200 | 0.315771   | Copy neutral |
| AGS | chr8 | 12391201 | 12456600 | 1.88357    | Copy gain    |
| AGS | chr8 | 12456601 | 15937800 | -0.115629  | Copy neutral |
| AGS | chr8 | 15937801 | 15945000 | -8.76023   | Copy loss    |
| AGS | chr8 | 15945001 | 16201200 | -0.135329  | Copy neutral |
| AGS | chr8 | 16201201 | 16207200 | -8.68153   | Copy loss    |
| AGS | chr8 | 16207201 | 17740200 | 0.0305705  | Copy neutral |
| AGS | chr8 | 17740201 | 17741400 | -5.19423   | Copy loss    |
| AGS | chr8 | 17741401 | 18339000 | 0.0933705  | Copy neutral |
| AGS | chr8 | 18339001 | 19899000 | 0.0222705  | Copy neutral |
| AGS | chr8 | 19899001 | 21226800 | -0.0905295 | Copy neutral |
| AGS | chr8 | 21226801 | 24972600 | 0.0402705  | Copy neutral |
| AGS | chr8 | 24972601 | 24990600 | -8.76023   | Copy loss    |
| AGS | chr8 | 24990601 | 25066800 | -0.0550295 | Copy neutral |
| AGS | chr8 | 25066801 | 25070400 | -8.76023   | Copy loss    |
| AGS | chr8 | 25070401 | 32680200 | 0.0303705  | Copy neutral |
| AGS | chr8 | 32680201 | 32691000 | -8.76023   | Copy loss    |
| AGS | chr8 | 32691001 | 33164700 | 0.0135705  | Copy neutral |
| AGS | chr8 | 33164701 | 35105400 | -0.151829  | Copy neutral |
| AGS | chr8 | 35105401 | 35107200 | -5.34083   | Copy loss    |
| AGS | chr8 | 35107201 | 35690400 | -0.158929  | Copy neutral |
| AGS | chr8 | 35690401 | 36519600 | -0.0811295 | Copy neutral |
| AGS | chr8 | 36519601 | 36780000 | 0.0268705  | Copy neutral |
| AGS | chr8 | 36780001 | 37528800 | 0.112771   | Copy neutral |
| AGS | chr8 | 37528801 | 37931400 | -0.0155295 | Copy neutral |
| AGS | chr8 | 37931401 | 37932600 | -8.76023   | Copy loss    |
| AGS | chr8 | 37932601 | 37933800 | -2.28613   | Copy loss    |
| AGS | chr8 | 37933801 | 38419200 | -0.0123295 | Copy neutral |
| AGS | chr8 | 38419201 | 39716400 | 0.0842705  | Copy neutral |
| AGS | chr8 | 39716401 | 40774800 | -0.0123295 | Copy neutral |
| AGS | chr8 | 40774801 | 40779600 | -8.76023   | Copy loss    |
| AGS | chr8 | 40779601 | 42190800 | 0.0294705  | Copy neutral |
| AGS | chr8 | 42190801 | 42193800 | -8.76023   | Copy loss    |
| AGS | chr8 | 42193801 | 43820400 | -0.0101295 | Copy neutral |
| AGS | chr8 | 43820401 | 43838888 | 5.19857    | Copy gain    |
| AGS | chr8 | 46838887 | 46856400 | 5.19857    | Copy gain    |
| AGS | chr8 | 46856401 | 46882800 | 0.748771   | Copy gain    |
| AGS | chr8 | 46882801 | 46897800 | 0.118171   | Copy neutral |
| AGS | chr8 | 46897801 | 46899000 | 1.29197    | Copy gain    |
| AGS | chr8 | 46899001 | 47710200 | -0.0615295 | Copy neutral |
| AGS | chr8 | 47710201 | 48079800 | 0.0253705  | Copy neutral |

|     |      |           |           |             |              |
|-----|------|-----------|-----------|-------------|--------------|
| AGS | chr8 | 48079801  | 48130500  | -0.0444295  | Copy neutral |
| AGS | chr8 | 48135599  | 49061400  | -0.0444295  | Copy neutral |
| AGS | chr8 | 49061401  | 49246800  | 0.0595705   | Copy neutral |
| AGS | chr8 | 49246801  | 49250400  | 0.617671    | Copy gain    |
| AGS | chr8 | 49250401  | 49281000  | 0.106471    | Copy neutral |
| AGS | chr8 | 49281001  | 49371000  | -0.00122946 | Copy neutral |
| AGS | chr8 | 49371001  | 49373700  | 0.723271    | Copy gain    |
| AGS | chr8 | 49373701  | 49638000  | -0.0325295  | Copy neutral |
| AGS | chr8 | 49638001  | 49639800  | -0.896129   | Copy loss    |
| AGS | chr8 | 49639801  | 50091000  | -0.0199295  | Copy neutral |
| AGS | chr8 | 50091001  | 52729800  | -0.0825295  | Copy neutral |
| AGS | chr8 | 52729801  | 52733400  | 0.989371    | Copy gain    |
| AGS | chr8 | 52733401  | 52870200  | -0.0984295  | Copy neutral |
| AGS | chr8 | 52870201  | 55752600  | 0.0150705   | Copy neutral |
| AGS | chr8 | 55752601  | 56371800  | -0.0857295  | Copy neutral |
| AGS | chr8 | 56371801  | 56656800  | 0.0180705   | Copy neutral |
| AGS | chr8 | 56656801  | 57020400  | -0.0906295  | Copy neutral |
| AGS | chr8 | 57020401  | 57603000  | 0.00637054  | Copy neutral |
| AGS | chr8 | 57603001  | 63238800  | 0.0533705   | Copy neutral |
| AGS | chr8 | 63238801  | 73949400  | -0.0477295  | Copy neutral |
| AGS | chr8 | 73949401  | 73950600  | -5.00043    | Copy loss    |
| AGS | chr8 | 73950601  | 74626200  | 0.0438705   | Copy neutral |
| AGS | chr8 | 74626201  | 75363000  | -0.0293295  | Copy neutral |
| AGS | chr8 | 75363001  | 75366600  | -8.62913    | Copy loss    |
| AGS | chr8 | 75366601  | 76165800  | -0.103129   | Copy neutral |
| AGS | chr8 | 76165801  | 76362000  | -1.18223    | Copy loss    |
| AGS | chr8 | 76362001  | 86576452  | -0.0271295  | Copy neutral |
| AGS | chr8 | 86726451  | 87173400  | -0.0271295  | Copy neutral |
| AGS | chr8 | 87173401  | 87174600  | -6.19273    | Copy loss    |
| AGS | chr8 | 87174601  | 93792000  | -0.0512295  | Copy neutral |
| AGS | chr8 | 93792001  | 105067800 | 0.0421705   | Copy neutral |
| AGS | chr8 | 105067801 | 105912600 | -0.0668295  | Copy neutral |
| AGS | chr8 | 105912601 | 106545600 | 0.0160705   | Copy neutral |
| AGS | chr8 | 106545601 | 106546800 | -1.09233    | Copy loss    |
| AGS | chr8 | 106546801 | 106888800 | 0.0577705   | Copy neutral |
| AGS | chr8 | 106888801 | 106890000 | -5.42343    | Copy loss    |
| AGS | chr8 | 106890001 | 108733200 | -0.0212295  | Copy neutral |
| AGS | chr8 | 108733201 | 109480200 | -0.0870295  | Copy neutral |
| AGS | chr8 | 109480201 | 112518600 | -0.0132295  | Copy neutral |
| AGS | chr8 | 112518601 | 113844000 | -0.0939295  | Copy neutral |
| AGS | chr8 | 113844001 | 117895200 | -0.0320295  | Copy neutral |
| AGS | chr8 | 117895201 | 118675800 | 0.108171    | Copy neutral |
| AGS | chr8 | 118675801 | 118873800 | -0.126829   | Copy neutral |
| AGS | chr8 | 118873801 | 118875600 | -8.07793    | Copy loss    |
| AGS | chr8 | 118875601 | 118951800 | -0.244829   | Copy neutral |
| AGS | chr8 | 118951801 | 125313600 | 0.0747705   | Copy neutral |
| AGS | chr8 | 125313601 | 125314800 | -4.85913    | Copy loss    |
| AGS | chr8 | 125314801 | 125359800 | 0.138971    | Copy neutral |
| AGS | chr8 | 125359801 | 126519000 | 0.0364705   | Copy neutral |
| AGS | chr8 | 126519001 | 127192200 | 0.135671    | Copy neutral |
| AGS | chr8 | 127192201 | 127194600 | -8.56353    | Copy loss    |
| AGS | chr8 | 127194601 | 127941000 | 0.0650705   | Copy neutral |

|     |      |           |           |            |              |
|-----|------|-----------|-----------|------------|--------------|
| AGS | chr8 | 127941001 | 128723400 | 0.154171   | Copy neutral |
| AGS | chr8 | 128723401 | 129042600 | -0.0126295 | Copy neutral |
| AGS | chr8 | 129042601 | 129760200 | 0.111671   | Copy neutral |
| AGS | chr8 | 129760201 | 129765600 | -8.60283   | Copy loss    |
| AGS | chr8 | 129765601 | 131850600 | 0.0405705  | Copy neutral |
| AGS | chr8 | 131850601 | 131852400 | -7.16153   | Copy loss    |
| AGS | chr8 | 131852401 | 133567200 | -0.0690295 | Copy neutral |
| AGS | chr8 | 133567201 | 134981400 | 0.0300705  | Copy neutral |
| AGS | chr8 | 134981401 | 136126800 | -0.0528295 | Copy neutral |
| AGS | chr8 | 136126801 | 140071200 | -0.151229  | Copy neutral |
| AGS | chr8 | 140071201 | 142766516 | 0.00797054 | Copy neutral |
| AGS | chr8 | 142816515 | 144702000 | 0.00797054 | Copy neutral |
| AGS | chr8 | 144702001 | 144714600 | -8.41353   | Copy loss    |
| AGS | chr8 | 144714601 | 145332589 | -0.0301295 | Copy neutral |
| AGS | chr8 | 145432588 | 146301000 | -0.0301295 | Copy neutral |
| AGS | chr8 | 146301001 | 146304023 | -6.99473   | Copy loss    |
| AGS | chr8 | 146364022 | 146364022 | -6.99473   | Copy loss    |
| AGS | chr9 | 10000     | 179400    | 0.312471   | Copy neutral |
| AGS | chr9 | 179401    | 181800    | -6.03953   | Copy loss    |
| AGS | chr9 | 181801    | 7528200   | 0.0179705  | Copy neutral |
| AGS | chr9 | 7528201   | 8688000   | -0.150129  | Copy neutral |
| AGS | chr9 | 8688001   | 8953200   | -0.250629  | Copy neutral |
| AGS | chr9 | 8953201   | 9593400   | -0.160629  | Copy neutral |
| AGS | chr9 | 9593401   | 9699600   | -1.24523   | Copy loss    |
| AGS | chr9 | 9699601   | 11938800  | -0.133429  | Copy neutral |
| AGS | chr9 | 11938801  | 12484200  | -0.0337295 | Copy neutral |
| AGS | chr9 | 12484201  | 12999000  | 0.0709705  | Copy neutral |
| AGS | chr9 | 12999001  | 14685300  | -0.0101295 | Copy neutral |
| AGS | chr9 | 14685301  | 15795600  | -0.118029  | Copy neutral |
| AGS | chr9 | 15795601  | 16008000  | -0.0217295 | Copy neutral |
| AGS | chr9 | 16008001  | 16658400  | -0.143929  | Copy neutral |
| AGS | chr9 | 16658401  | 16905000  | -0.280329  | Copy neutral |
| AGS | chr9 | 16905001  | 16908600  | -1.08333   | Copy loss    |
| AGS | chr9 | 16908601  | 17084400  | -0.251829  | Copy neutral |
| AGS | chr9 | 17084401  | 17910000  | -0.150329  | Copy neutral |
| AGS | chr9 | 17910001  | 17912700  | -8.76023   | Copy loss    |
| AGS | chr9 | 17912701  | 18411600  | -0.0695295 | Copy neutral |
| AGS | chr9 | 18411601  | 19067400  | 0.0537705  | Copy neutral |
| AGS | chr9 | 19067401  | 19284000  | -0.0524295 | Copy neutral |
| AGS | chr9 | 19284001  | 21106800  | 0.0478705  | Copy neutral |
| AGS | chr9 | 21106801  | 22522200  | 0.152871   | Copy neutral |
| AGS | chr9 | 22522201  | 22563000  | 0.0498705  | Copy neutral |
| AGS | chr9 | 22563001  | 22564200  | -1.04563   | Copy loss    |
| AGS | chr9 | 22564201  | 22786200  | 0.0360705  | Copy neutral |
| AGS | chr9 | 22786201  | 23362800  | -0.104229  | Copy neutral |
| AGS | chr9 | 23362801  | 23377800  | -1.19413   | Copy loss    |
| AGS | chr9 | 23377801  | 24611400  | -0.161429  | Copy neutral |
| AGS | chr9 | 24611401  | 24622800  | -1.14963   | Copy loss    |
| AGS | chr9 | 24622801  | 26254500  | -0.118929  | Copy neutral |
| AGS | chr9 | 26254501  | 26343600  | -0.416929  | Copy neutral |
| AGS | chr9 | 26343601  | 26572200  | -0.100029  | Copy neutral |
| AGS | chr9 | 26572201  | 27990000  | -0.0367295 | Copy neutral |

|     |      |          |          |            |              |
|-----|------|----------|----------|------------|--------------|
| AGS | chr9 | 27990001 | 28883400 | -0.150629  | Copy neutral |
| AGS | chr9 | 28883401 | 28885800 | -1.59993   | Copy loss    |
| AGS | chr9 | 28885801 | 30739800 | -0.140529  | Copy neutral |
| AGS | chr9 | 30739801 | 30741000 | -2.34883   | Copy loss    |
| AGS | chr9 | 30741001 | 31291200 | -0.0903295 | Copy neutral |
| AGS | chr9 | 31291201 | 31292400 | -7.24923   | Copy loss    |
| AGS | chr9 | 31292401 | 32569800 | -0.0525295 | Copy neutral |
| AGS | chr9 | 32569801 | 36363000 | 0.0627705  | Copy neutral |
| AGS | chr9 | 36363001 | 36364200 | -5.22793   | Copy loss    |
| AGS | chr9 | 36364201 | 39211200 | 0.0471705  | Copy neutral |
| AGS | chr9 | 39211201 | 39428400 | -4.15023   | Copy loss    |
| AGS | chr9 | 39428401 | 39663687 | -0.0651295 | Copy neutral |
| AGS | chr9 | 39713686 | 39974797 | -0.0651295 | Copy neutral |
| AGS | chr9 | 40024796 | 40233030 | -0.0651295 | Copy neutral |
| AGS | chr9 | 40283029 | 40425835 | -0.0651295 | Copy neutral |
| AGS | chr9 | 40475834 | 40940342 | -0.0651295 | Copy neutral |
| AGS | chr9 | 40990341 | 41143215 | -0.0651295 | Copy neutral |
| AGS | chr9 | 41193214 | 41363400 | -0.0651295 | Copy neutral |
| AGS | chr9 | 41363401 | 41365794 | -5.89833   | Copy loss    |
| AGS | chr9 | 41415793 | 41554200 | -5.89833   | Copy loss    |
| AGS | chr9 | 41554201 | 42613956 | 0.105171   | Copy neutral |
| AGS | chr9 | 42663955 | 43213699 | 0.105171   | Copy neutral |
| AGS | chr9 | 43313698 | 43946570 | 0.105171   | Copy neutral |
| AGS | chr9 | 43996569 | 44244000 | 0.105171   | Copy neutral |
| AGS | chr9 | 44244001 | 44307000 | -7.41113   | Copy loss    |
| AGS | chr9 | 44307001 | 44598600 | 0.476771   | Copy gain    |
| AGS | chr9 | 44598601 | 44676647 | -1.09763   | Copy loss    |
| AGS | chr9 | 44726646 | 44734500 | -1.09763   | Copy loss    |
| AGS | chr9 | 44734501 | 44778000 | -0.273029  | Copy neutral |
| AGS | chr9 | 44778001 | 44792400 | -0.930729  | Copy loss    |
| AGS | chr9 | 44792401 | 44797200 | 0.252971   | Copy neutral |
| AGS | chr9 | 44797201 | 44800200 | 0.822071   | Copy gain    |
| AGS | chr9 | 44800201 | 44812200 | 0.251071   | Copy neutral |
| AGS | chr9 | 44812201 | 44870400 | -0.396029  | Copy neutral |
| AGS | chr9 | 44870401 | 44908294 | 0.165571   | Copy neutral |
| AGS | chr9 | 44958293 | 45127500 | 0.165571   | Copy neutral |
| AGS | chr9 | 45127501 | 45250204 | 1.46347    | Copy gain    |
| AGS | chr9 | 45350203 | 45392700 | 1.46347    | Copy gain    |
| AGS | chr9 | 45392701 | 45815522 | 0.302371   | Copy neutral |
| AGS | chr9 | 45865521 | 46216431 | 0.302371   | Copy neutral |
| AGS | chr9 | 46266430 | 46461040 | 0.302371   | Copy neutral |
| AGS | chr9 | 46561039 | 47060134 | 0.302371   | Copy neutral |
| AGS | chr9 | 47160133 | 47317680 | 0.302371   | Copy neutral |
| AGS | chr9 | 65467679 | 65918361 | 0.302371   | Copy neutral |
| AGS | chr9 | 65968360 | 66192216 | 0.302371   | Copy neutral |
| AGS | chr9 | 66242215 | 66399900 | 0.302371   | Copy neutral |
| AGS | chr9 | 66399901 | 66404657 | 1.70847    | Copy gain    |
| AGS | chr9 | 66454656 | 66458400 | 1.70847    | Copy gain    |
| AGS | chr9 | 66458401 | 66486600 | 2.87497    | Copy gain    |
| AGS | chr9 | 66486601 | 66539700 | 1.59967    | Copy gain    |
| AGS | chr9 | 66539701 | 66614196 | 0.578271   | Copy gain    |
| AGS | chr9 | 66664195 | 66814500 | 0.578271   | Copy gain    |

|     |      |           |           |            |              |
|-----|------|-----------|-----------|------------|--------------|
| AGS | chr9 | 66814501  | 66833400  | 1.35027    | Copy gain    |
| AGS | chr9 | 66833401  | 66834600  | 6.88227    | Copy gain    |
| AGS | chr9 | 66834601  | 66863344  | 1.32857    | Copy gain    |
| AGS | chr9 | 66913343  | 66922200  | 1.32857    | Copy gain    |
| AGS | chr9 | 66922201  | 67107835  | 0.0792705  | Copy neutral |
| AGS | chr9 | 67207834  | 67277400  | 0.0792705  | Copy neutral |
| AGS | chr9 | 67277401  | 67329300  | 1.04677    | Copy gain    |
| AGS | chr9 | 67329301  | 67339800  | 1.95947    | Copy gain    |
| AGS | chr9 | 67339801  | 67366297  | 0.200071   | Copy neutral |
| AGS | chr9 | 67516296  | 67919400  | 0.200071   | Copy neutral |
| AGS | chr9 | 67919401  | 67931400  | -2.70623   | Copy loss    |
| AGS | chr9 | 67931401  | 67987999  | 0.128371   | Copy neutral |
| AGS | chr9 | 68137998  | 68341200  | 0.128371   | Copy neutral |
| AGS | chr9 | 68341201  | 68347200  | 1.07887    | Copy gain    |
| AGS | chr9 | 68347201  | 68349600  | 0.225271   | Copy neutral |
| AGS | chr9 | 68349601  | 68354400  | 1.05217    | Copy gain    |
| AGS | chr9 | 68354401  | 68367000  | 1.77587    | Copy gain    |
| AGS | chr9 | 68367001  | 68382000  | 0.797671   | Copy gain    |
| AGS | chr9 | 68382001  | 68393400  | 1.72417    | Copy gain    |
| AGS | chr9 | 68393401  | 68408400  | 2.61437    | Copy gain    |
| AGS | chr9 | 68408401  | 68413800  | 1.14097    | Copy gain    |
| AGS | chr9 | 68413801  | 68434800  | 3.51467    | Copy gain    |
| AGS | chr9 | 68434801  | 68505600  | 1.86327    | Copy gain    |
| AGS | chr9 | 68505601  | 68514182  | 0.481471   | Copy gain    |
| AGS | chr9 | 68664181  | 68838947  | 0.481471   | Copy gain    |
| AGS | chr9 | 68988946  | 68995200  | 0.481471   | Copy gain    |
| AGS | chr9 | 68995201  | 69087900  | 1.47987    | Copy gain    |
| AGS | chr9 | 69087901  | 69278386  | 0.177871   | Copy neutral |
| AGS | chr9 | 69328385  | 69450900  | 1.06107    | Copy gain    |
| AGS | chr9 | 69450901  | 69743400  | 0.344971   | Copy neutral |
| AGS | chr9 | 69743401  | 69787200  | -8.76023   | Copy loss    |
| AGS | chr9 | 69787201  | 69858600  | 1.30457    | Copy gain    |
| AGS | chr9 | 69858601  | 69942600  | -0.0127295 | Copy neutral |
| AGS | chr9 | 69942601  | 70002900  | 1.00147    | Copy gain    |
| AGS | chr9 | 70002901  | 70010543  | 0.0802705  | Copy neutral |
| AGS | chr9 | 70060542  | 70218730  | 0.0802705  | Copy neutral |
| AGS | chr9 | 70318729  | 70506536  | 0.0802705  | Copy neutral |
| AGS | chr9 | 70556535  | 70735469  | 0.0802705  | Copy neutral |
| AGS | chr9 | 70835468  | 70881000  | 1.75607    | Copy gain    |
| AGS | chr9 | 70881001  | 70993200  | 0.167371   | Copy neutral |
| AGS | chr9 | 70993201  | 71015400  | 0.388071   | Copy neutral |
| AGS | chr9 | 71015401  | 71649000  | 0.0553705  | Copy neutral |
| AGS | chr9 | 71649001  | 71738400  | -0.133829  | Copy neutral |
| AGS | chr9 | 71738401  | 71743200  | -8.76023   | Copy loss    |
| AGS | chr9 | 71743201  | 89154600  | 0.0168705  | Copy neutral |
| AGS | chr9 | 89154601  | 89155800  | -8.76023   | Copy loss    |
| AGS | chr9 | 89155801  | 92343417  | 0.0406705  | Copy neutral |
| AGS | chr9 | 92443416  | 92528797  | 0.0406705  | Copy neutral |
| AGS | chr9 | 92678796  | 96470400  | 0.0406705  | Copy neutral |
| AGS | chr9 | 96470401  | 96471600  | -5.05623   | Copy loss    |
| AGS | chr9 | 96471601  | 101309400 | 0.0658705  | Copy neutral |
| AGS | chr9 | 101309401 | 101311200 | -8.76023   | Copy loss    |

|     |       |           |           |             |              |
|-----|-------|-----------|-----------|-------------|--------------|
| AGS | chr9  | 101311201 | 133073061 | -0.00192946 | Copy neutral |
| AGS | chr9  | 133223060 | 137041194 | -0.00192946 | Copy neutral |
| AGS | chr9  | 137091193 | 139166998 | -0.00192946 | Copy neutral |
| AGS | chr9  | 139216997 | 140253600 | -0.00192946 | Copy neutral |
| AGS | chr9  | 140253601 | 140255400 | -8.76023    | Copy loss    |
| AGS | chr9  | 140255401 | 141153432 | -0.0315295  | Copy neutral |
| AGS | chr9  | 141213431 | 141213431 | -0.0315295  | Copy neutral |
| AGS | chr10 | 60000     | 4290000   | -0.0232295  | Copy neutral |
| AGS | chr10 | 4290001   | 4291200   | -8.76023    | Copy loss    |
| AGS | chr10 | 4291201   | 4708800   | 0.0869705   | Copy neutral |
| AGS | chr10 | 4708801   | 4710000   | -8.76023    | Copy loss    |
| AGS | chr10 | 4710001   | 5596200   | 0.127971    | Copy neutral |
| AGS | chr10 | 5596201   | 7077000   | 0.0158705   | Copy neutral |
| AGS | chr10 | 7077001   | 7078200   | -8.76023    | Copy loss    |
| AGS | chr10 | 7078201   | 8035200   | -0.0722295  | Copy neutral |
| AGS | chr10 | 8035201   | 8170200   | -0.215129   | Copy neutral |
| AGS | chr10 | 8170201   | 8310600   | -0.103229   | Copy neutral |
| AGS | chr10 | 8310601   | 8311800   | -8.76023    | Copy loss    |
| AGS | chr10 | 8311801   | 17974676  | -0.0302295  | Copy neutral |
| AGS | chr10 | 18024675  | 18054300  | -0.0302295  | Copy neutral |
| AGS | chr10 | 18054301  | 18207300  | -3.28863    | Copy loss    |
| AGS | chr10 | 18207301  | 19996800  | -0.0967295  | Copy neutral |
| AGS | chr10 | 19996801  | 19998000  | -8.76023    | Copy loss    |
| AGS | chr10 | 19998001  | 20884800  | -0.153329   | Copy neutral |
| AGS | chr10 | 20884801  | 21594000  | 0.00667054  | Copy neutral |
| AGS | chr10 | 21594001  | 21614400  | -0.135529   | Copy neutral |
| AGS | chr10 | 21614401  | 21615600  | -5.73393    | Copy loss    |
| AGS | chr10 | 21615601  | 36219600  | 0.0257705   | Copy neutral |
| AGS | chr10 | 36219601  | 36220800  | -8.76023    | Copy loss    |
| AGS | chr10 | 36220801  | 36604200  | -0.132029   | Copy neutral |
| AGS | chr10 | 36604201  | 37182000  | -0.280429   | Copy neutral |
| AGS | chr10 | 37182001  | 37452600  | -0.162729   | Copy neutral |
| AGS | chr10 | 37452601  | 37458600  | 0.503671    | Copy gain    |
| AGS | chr10 | 37458601  | 37473300  | 2.82077     | Copy gain    |
| AGS | chr10 | 37473301  | 37514400  | 0.000770536 | Copy neutral |
| AGS | chr10 | 37514401  | 37760400  | -0.169429   | Copy neutral |
| AGS | chr10 | 37760401  | 37777800  | -0.478129   | Copy loss    |
| AGS | chr10 | 37777801  | 38519400  | -0.159329   | Copy neutral |
| AGS | chr10 | 38519401  | 38560800  | 0.0188705   | Copy neutral |
| AGS | chr10 | 38560801  | 38569800  | 0.688771    | Copy gain    |
| AGS | chr10 | 38569801  | 38805600  | -0.0192295  | Copy neutral |
| AGS | chr10 | 38805601  | 38815800  | 0.288871    | Copy neutral |
| AGS | chr10 | 38815801  | 38818836  | 3.40747     | Copy gain    |
| AGS | chr10 | 38868835  | 38973000  | 0.270271    | Copy neutral |
| AGS | chr10 | 38973001  | 38978400  | 0.999871    | Copy gain    |
| AGS | chr10 | 38978401  | 39039000  | 0.130271    | Copy neutral |
| AGS | chr10 | 39039001  | 39053100  | 0.623871    | Copy gain    |
| AGS | chr10 | 39053101  | 39078000  | 0.153471    | Copy neutral |
| AGS | chr10 | 39078001  | 39079800  | 1.92767     | Copy gain    |
| AGS | chr10 | 39079801  | 39107400  | 0.243071    | Copy neutral |
| AGS | chr10 | 39107401  | 39154936  | 0.805671    | Copy gain    |
| AGS | chr10 | 42354935  | 42383400  | 3.74087     | Copy gain    |

|     |       |          |          |             |              |
|-----|-------|----------|----------|-------------|--------------|
| AGS | chr10 | 42383401 | 42397200 | 9.00867     | Copy gain    |
| AGS | chr10 | 42397201 | 42400800 | 5.05657     | Copy gain    |
| AGS | chr10 | 42400801 | 42408000 | 0.454771    | Copy gain    |
| AGS | chr10 | 42408001 | 42409800 | 5.25257     | Copy gain    |
| AGS | chr10 | 42409801 | 42527400 | -0.0572295  | Copy neutral |
| AGS | chr10 | 42527401 | 42529800 | 7.81747     | Copy gain    |
| AGS | chr10 | 42529801 | 42546688 | 3.18407     | Copy gain    |
| AGS | chr10 | 42596687 | 42600600 | 9.32167     | Copy gain    |
| AGS | chr10 | 42600601 | 42605400 | 1.25307     | Copy gain    |
| AGS | chr10 | 42605401 | 42609000 | -0.348629   | Copy neutral |
| AGS | chr10 | 42609001 | 42646800 | 0.945371    | Copy gain    |
| AGS | chr10 | 42646801 | 42663000 | 1.83787     | Copy gain    |
| AGS | chr10 | 42663001 | 46426965 | -0.00702946 | Copy neutral |
| AGS | chr10 | 46476964 | 46945200 | -0.00702946 | Copy neutral |
| AGS | chr10 | 46945201 | 46952400 | 0.734271    | Copy gain    |
| AGS | chr10 | 46952401 | 47008800 | 0.788971    | Copy gain    |
| AGS | chr10 | 47008801 | 47064600 | 0.994371    | Copy gain    |
| AGS | chr10 | 47064601 | 47068800 | 1.41667     | Copy gain    |
| AGS | chr10 | 47068801 | 47081400 | 1.05127     | Copy gain    |
| AGS | chr10 | 47081401 | 47110200 | 0.835771    | Copy gain    |
| AGS | chr10 | 47110201 | 47121600 | 1.12877     | Copy gain    |
| AGS | chr10 | 47121601 | 47139000 | 0.950971    | Copy gain    |
| AGS | chr10 | 47139001 | 47150400 | 1.24367     | Copy gain    |
| AGS | chr10 | 47150401 | 47301600 | -0.153229   | Copy neutral |
| AGS | chr10 | 47301601 | 47429170 | 0.676571    | Copy gain    |
| AGS | chr10 | 47529169 | 47535600 | 0.676571    | Copy gain    |
| AGS | chr10 | 47535601 | 47748000 | 0.121571    | Copy neutral |
| AGS | chr10 | 47748001 | 47792477 | -1.49683    | Copy loss    |
| AGS | chr10 | 47892476 | 47952300 | -1.49683    | Copy loss    |
| AGS | chr10 | 47952301 | 48055708 | 0.135571    | Copy neutral |
| AGS | chr10 | 48105707 | 48213900 | -7.37543    | Copy loss    |
| AGS | chr10 | 48213901 | 48558000 | 0.115471    | Copy neutral |
| AGS | chr10 | 48558001 | 48559200 | -5.18543    | Copy loss    |
| AGS | chr10 | 48559201 | 49095537 | 0.0332705   | Copy neutral |
| AGS | chr10 | 49195536 | 49392600 | 0.0332705   | Copy neutral |
| AGS | chr10 | 49392601 | 49851600 | 0.0822705   | Copy neutral |
| AGS | chr10 | 49851601 | 51137411 | 0.0161705   | Copy neutral |
| AGS | chr10 | 51187410 | 51398846 | 0.0161705   | Copy neutral |
| AGS | chr10 | 51448845 | 51901200 | 0.0161705   | Copy neutral |
| AGS | chr10 | 51901201 | 51959100 | -4.34143    | Copy loss    |
| AGS | chr10 | 51959101 | 51990300 | -1.98413    | Copy loss    |
| AGS | chr10 | 51990301 | 52705200 | 0.0231705   | Copy neutral |
| AGS | chr10 | 52705201 | 53723400 | -0.127929   | Copy neutral |
| AGS | chr10 | 53723401 | 54783600 | -0.00302946 | Copy neutral |
| AGS | chr10 | 54783601 | 54788400 | -0.996929   | Copy loss    |
| AGS | chr10 | 54788401 | 54928800 | -0.0326295  | Copy neutral |
| AGS | chr10 | 54928801 | 54937800 | -1.21803    | Copy loss    |
| AGS | chr10 | 54937801 | 59274000 | -0.118529   | Copy neutral |
| AGS | chr10 | 59274001 | 59275200 | -0.790629   | Copy loss    |
| AGS | chr10 | 59275201 | 60001800 | -0.0276295  | Copy neutral |
| AGS | chr10 | 60001801 | 60007800 | -0.829029   | Copy loss    |
| AGS | chr10 | 60007801 | 60610800 | -0.0403295  | Copy neutral |

|     |       |           |           |             |              |
|-----|-------|-----------|-----------|-------------|--------------|
| AGS | chr10 | 60610801  | 62230800  | 0.0238705   | Copy neutral |
| AGS | chr10 | 62230801  | 64487400  | 0.102271    | Copy neutral |
| AGS | chr10 | 64487401  | 64510800  | 0.0300705   | Copy neutral |
| AGS | chr10 | 64510801  | 64512000  | -1.16813    | Copy loss    |
| AGS | chr10 | 64512001  | 64789200  | 0.0295705   | Copy neutral |
| AGS | chr10 | 64789201  | 65123400  | -0.0668295  | Copy neutral |
| AGS | chr10 | 65123401  | 65452800  | 0.0153705   | Copy neutral |
| AGS | chr10 | 65452801  | 65570400  | 0.124971    | Copy neutral |
| AGS | chr10 | 65570401  | 65571900  | -5.09743    | Copy loss    |
| AGS | chr10 | 65571901  | 77225400  | 0.0183705   | Copy neutral |
| AGS | chr10 | 77225401  | 77268600  | -0.785229   | Copy loss    |
| AGS | chr10 | 77268601  | 77299800  | 0.127071    | Copy neutral |
| AGS | chr10 | 77299801  | 77341800  | -0.907529   | Copy loss    |
| AGS | chr10 | 77341801  | 77449200  | 0.0975705   | Copy neutral |
| AGS | chr10 | 77449201  | 77841000  | -0.912629   | Copy loss    |
| AGS | chr10 | 77841001  | 78255600  | 0.104371    | Copy neutral |
| AGS | chr10 | 78255601  | 78261000  | -8.76023    | Copy loss    |
| AGS | chr10 | 78261001  | 82744800  | 0.0713705   | Copy neutral |
| AGS | chr10 | 82744801  | 85694400  | -0.147629   | Copy neutral |
| AGS | chr10 | 85694401  | 106686000 | 0.0557705   | Copy neutral |
| AGS | chr10 | 106686001 | 111094800 | -0.132329   | Copy neutral |
| AGS | chr10 | 111094801 | 117343500 | 0.0527705   | Copy neutral |
| AGS | chr10 | 117343501 | 117472200 | -0.0735295  | Copy neutral |
| AGS | chr10 | 117472201 | 118065000 | -0.155429   | Copy neutral |
| AGS | chr10 | 118065001 | 118577400 | -0.0715295  | Copy neutral |
| AGS | chr10 | 118577401 | 120789000 | 0.0471705   | Copy neutral |
| AGS | chr10 | 120789001 | 120790200 | -8.76023    | Copy loss    |
| AGS | chr10 | 120790201 | 122227200 | -0.00222946 | Copy neutral |
| AGS | chr10 | 122227201 | 122228400 | -8.76023    | Copy loss    |
| AGS | chr10 | 122228401 | 125869473 | 0.0399705   | Copy neutral |
| AGS | chr10 | 125919472 | 127574400 | 0.0399705   | Copy neutral |
| AGS | chr10 | 127574401 | 127584600 | 2.92837     | Copy gain    |
| AGS | chr10 | 127584601 | 127594800 | 1.65617     | Copy gain    |
| AGS | chr10 | 127594801 | 128616070 | -0.0907295  | Copy neutral |
| AGS | chr10 | 128766069 | 133109400 | -0.0907295  | Copy neutral |
| AGS | chr10 | 133109401 | 133110600 | -8.76023    | Copy loss    |
| AGS | chr10 | 133110601 | 133381405 | -0.0520295  | Copy neutral |
| AGS | chr10 | 133431404 | 133455600 | -0.0520295  | Copy neutral |
| AGS | chr10 | 133455601 | 133456800 | -8.76023    | Copy loss    |
| AGS | chr10 | 133456801 | 133677528 | 0.0130705   | Copy neutral |
| AGS | chr10 | 133727527 | 135524748 | 0.0130705   | Copy neutral |
| AGS | chr10 | 135534747 | 135534747 | 0.0130705   | Copy neutral |
| AGS | chr11 | 60000     | 180600    | -0.00562946 | Copy neutral |
| AGS | chr11 | 180601    | 195600    | 0.931771    | Copy gain    |
| AGS | chr11 | 195601    | 369000    | -0.0131295  | Copy neutral |
| AGS | chr11 | 369001    | 370200    | -8.76023    | Copy loss    |
| AGS | chr11 | 370201    | 1162760   | -0.0171295  | Copy neutral |
| AGS | chr11 | 1212759   | 7936200   | -0.0171295  | Copy neutral |
| AGS | chr11 | 7936201   | 20371200  | 0.0813705   | Copy neutral |
| AGS | chr11 | 20371201  | 20417400  | -0.0909295  | Copy neutral |
| AGS | chr11 | 20417401  | 20461800  | 0.0680705   | Copy neutral |
| AGS | chr11 | 20461801  | 20463600  | -0.859329   | Copy loss    |



|     |       |          |          |             |              |
|-----|-------|----------|----------|-------------|--------------|
| AGS | chr11 | 20463601 | 20535000 | 0.0694705   | Copy neutral |
| AGS | chr11 | 20535001 | 24443400 | -0.0953295  | Copy neutral |
| AGS | chr11 | 24443401 | 24451800 | -8.76023    | Copy loss    |
| AGS | chr11 | 24451801 | 29007000 | 0.00787054  | Copy neutral |
| AGS | chr11 | 29007001 | 29012400 | -8.30373    | Copy loss    |
| AGS | chr11 | 29012401 | 38752200 | 0.0268705   | Copy neutral |
| AGS | chr11 | 38752201 | 43764000 | -0.126429   | Copy neutral |
| AGS | chr11 | 43764001 | 47061000 | 0.0389705   | Copy neutral |
| AGS | chr11 | 47061001 | 47063400 | -8.76023    | Copy loss    |
| AGS | chr11 | 47063401 | 48339000 | -0.0116295  | Copy neutral |
| AGS | chr11 | 48339001 | 48367200 | 0.614371    | Copy gain    |
| AGS | chr11 | 48367201 | 48373800 | 0.158271    | Copy neutral |
| AGS | chr11 | 48373801 | 48391200 | 0.655571    | Copy gain    |
| AGS | chr11 | 48391201 | 48601200 | 0.0538705   | Copy neutral |
| AGS | chr11 | 48601201 | 48604200 | -8.56353    | Copy loss    |
| AGS | chr11 | 48604201 | 48735000 | -0.0510295  | Copy neutral |
| AGS | chr11 | 48735001 | 48736800 | -8.49793    | Copy loss    |
| AGS | chr11 | 48736801 | 48880800 | 0.0525705   | Copy neutral |
| AGS | chr11 | 48880801 | 48882000 | -4.87183    | Copy loss    |
| AGS | chr11 | 48882001 | 48962400 | 0.0573705   | Copy neutral |
| AGS | chr11 | 48962401 | 48964200 | 1.81947     | Copy gain    |
| AGS | chr11 | 48964201 | 50040600 | -0.0788295  | Copy neutral |
| AGS | chr11 | 50040601 | 50271000 | -0.217429   | Copy neutral |
| AGS | chr11 | 50271001 | 50640000 | -0.0671295  | Copy neutral |
| AGS | chr11 | 50640001 | 50641200 | -2.53443    | Copy loss    |
| AGS | chr11 | 50641201 | 50658600 | 0.00767054  | Copy neutral |
| AGS | chr11 | 50658601 | 50783854 | 0.192071    | Copy neutral |
| AGS | chr11 | 51090853 | 51119700 | 0.192071    | Copy neutral |
| AGS | chr11 | 51119701 | 51341400 | -0.130329   | Copy neutral |
| AGS | chr11 | 51341401 | 51363000 | -8.69463    | Copy loss    |
| AGS | chr11 | 51363001 | 51567000 | -0.0730295  | Copy neutral |
| AGS | chr11 | 51567001 | 51569400 | 0.789971    | Copy gain    |
| AGS | chr11 | 51569401 | 51594206 | 2.56917     | Copy gain    |
| AGS | chr11 | 54694205 | 54791400 | -5.34413    | Copy loss    |
| AGS | chr11 | 54791401 | 55012200 | -0.121229   | Copy neutral |
| AGS | chr11 | 55012201 | 55016400 | 1.19077     | Copy gain    |
| AGS | chr11 | 55016401 | 55365600 | -0.0999295  | Copy neutral |
| AGS | chr11 | 55365601 | 55431600 | -1.14213    | Copy loss    |
| AGS | chr11 | 55431601 | 55434600 | -0.109129   | Copy neutral |
| AGS | chr11 | 55434601 | 55444200 | -1.09543    | Copy loss    |
| AGS | chr11 | 55444201 | 55446000 | -0.0687295  | Copy neutral |
| AGS | chr11 | 55446001 | 55453200 | -1.29303    | Copy loss    |
| AGS | chr11 | 55453201 | 56553600 | -0.117529   | Copy neutral |
| AGS | chr11 | 56553601 | 57259200 | -0.00372946 | Copy neutral |
| AGS | chr11 | 57259201 | 57260400 | -1.95153    | Copy loss    |
| AGS | chr11 | 57260401 | 57451200 | -0.0293295  | Copy neutral |
| AGS | chr11 | 57451201 | 57566400 | -0.166229   | Copy neutral |
| AGS | chr11 | 57566401 | 63339000 | 0.0594705   | Copy neutral |
| AGS | chr11 | 63339001 | 66885600 | -0.0144295  | Copy neutral |
| AGS | chr11 | 66885601 | 66886800 | -8.76023    | Copy loss    |
| AGS | chr11 | 66886801 | 69089802 | 0.0574705   | Copy neutral |
| AGS | chr11 | 69139801 | 69724696 | 0.0574705   | Copy neutral |

|     |       |           |           |             |              |
|-----|-------|-----------|-----------|-------------|--------------|
| AGS | chr11 | 69774695  | 74952000  | 0.0574705   | Copy neutral |
| AGS | chr11 | 74952001  | 74953200  | -8.76023    | Copy loss    |
| AGS | chr11 | 74953201  | 78532200  | 0.0735705   | Copy neutral |
| AGS | chr11 | 78532201  | 80305800  | -0.0556295  | Copy neutral |
| AGS | chr11 | 80305801  | 80313000  | -0.984729   | Copy loss    |
| AGS | chr11 | 80313001  | 80986800  | -0.0119295  | Copy neutral |
| AGS | chr11 | 80986801  | 82165200  | -0.0998295  | Copy neutral |
| AGS | chr11 | 82165201  | 82374600  | -0.0364295  | Copy neutral |
| AGS | chr11 | 82374601  | 83378400  | 0.0313705   | Copy neutral |
| AGS | chr11 | 83378401  | 83743200  | -0.0531295  | Copy neutral |
| AGS | chr11 | 83743201  | 84385200  | -0.133029   | Copy neutral |
| AGS | chr11 | 84385201  | 84747600  | -0.0411295  | Copy neutral |
| AGS | chr11 | 84747601  | 85263000  | 0.0741705   | Copy neutral |
| AGS | chr11 | 85263001  | 85274400  | -0.976629   | Copy loss    |
| AGS | chr11 | 85274401  | 86634000  | 0.120271    | Copy neutral |
| AGS | chr11 | 86634001  | 87688379  | 0.000470536 | Copy neutral |
| AGS | chr11 | 87738378  | 88608000  | 0.000470536 | Copy neutral |
| AGS | chr11 | 88608001  | 89568000  | -0.103329   | Copy neutral |
| AGS | chr11 | 89568001  | 89654400  | 0.581771    | Copy gain    |
| AGS | chr11 | 89654401  | 89673600  | -0.245429   | Copy neutral |
| AGS | chr11 | 89673601  | 89707200  | -2.08763    | Copy loss    |
| AGS | chr11 | 89707201  | 90795000  | -0.106529   | Copy neutral |
| AGS | chr11 | 90795001  | 92557200  | -0.193629   | Copy neutral |
| AGS | chr11 | 92557201  | 92851800  | -0.123729   | Copy neutral |
| AGS | chr11 | 92851801  | 96287585  | 0.00207054  | Copy neutral |
| AGS | chr11 | 96437584  | 126716400 | 0.00207054  | Copy neutral |
| AGS | chr11 | 126716401 | 127302000 | -0.146229   | Copy neutral |
| AGS | chr11 | 127302001 | 127561200 | -0.393029   | Copy neutral |
| AGS | chr11 | 127561201 | 131656800 | 0.0377705   | Copy neutral |
| AGS | chr11 | 131656801 | 134946517 | -0.126829   | Copy neutral |
| AGS | chr11 | 135006516 | 135006516 | -0.126829   | Copy neutral |
| AGS | chr12 | 60000     | 95740     | 1.36057     | Copy gain    |
| AGS | chr12 | 145739    | 171600    | 1.36057     | Copy gain    |
| AGS | chr12 | 171601    | 208200    | 0.694871    | Copy gain    |
| AGS | chr12 | 208201    | 356400    | 0.499271    | Copy gain    |
| AGS | chr12 | 356401    | 457500    | 0.735771    | Copy gain    |
| AGS | chr12 | 457501    | 459600    | -0.0564295  | Copy neutral |
| AGS | chr12 | 459601    | 487200    | 0.715771    | Copy gain    |
| AGS | chr12 | 487201    | 881400    | 0.500271    | Copy gain    |
| AGS | chr12 | 881401    | 1015800   | 0.681171    | Copy gain    |
| AGS | chr12 | 1015801   | 1120800   | 0.433471    | Copy neutral |
| AGS | chr12 | 1120801   | 1246200   | 0.613771    | Copy gain    |
| AGS | chr12 | 1246201   | 1248000   | -0.332629   | Copy neutral |
| AGS | chr12 | 1248001   | 1587600   | 0.666671    | Copy gain    |
| AGS | chr12 | 1587601   | 2829000   | 0.560271    | Copy gain    |
| AGS | chr12 | 2829001   | 2830200   | -1.53613    | Copy loss    |
| AGS | chr12 | 2830201   | 2902200   | 0.596471    | Copy gain    |
| AGS | chr12 | 2902201   | 3425400   | 0.421371    | Copy neutral |
| AGS | chr12 | 3425401   | 3599400   | 0.584371    | Copy gain    |
| AGS | chr12 | 3599401   | 3603000   | -0.122329   | Copy neutral |
| AGS | chr12 | 3603001   | 4093200   | 0.562171    | Copy gain    |
| AGS | chr12 | 4093201   | 4095000   | -0.671329   | Copy loss    |

|     |       |          |          |            |              |
|-----|-------|----------|----------|------------|--------------|
| AGS | chr12 | 4095001  | 4378200  | 0.537371   | Copy gain    |
| AGS | chr12 | 4378201  | 4385400  | -0.113729  | Copy neutral |
| AGS | chr12 | 4385401  | 4448400  | 0.443671   | Copy neutral |
| AGS | chr12 | 4448401  | 4478400  | 0.696371   | Copy gain    |
| AGS | chr12 | 4478401  | 4555800  | 0.501571   | Copy gain    |
| AGS | chr12 | 4555801  | 4578000  | 0.615771   | Copy gain    |
| AGS | chr12 | 4578001  | 4670400  | 0.729071   | Copy gain    |
| AGS | chr12 | 4670401  | 5017200  | 0.590871   | Copy gain    |
| AGS | chr12 | 5017201  | 5021400  | 0.0922705  | Copy neutral |
| AGS | chr12 | 5021401  | 5221800  | 0.601371   | Copy gain    |
| AGS | chr12 | 5221801  | 5223600  | -0.720029  | Copy loss    |
| AGS | chr12 | 5223601  | 5539200  | 0.629971   | Copy gain    |
| AGS | chr12 | 5539201  | 5542800  | -0.157829  | Copy neutral |
| AGS | chr12 | 5542801  | 5718600  | 0.607471   | Copy gain    |
| AGS | chr12 | 5718601  | 5720400  | -0.478229  | Copy loss    |
| AGS | chr12 | 5720401  | 6038400  | 0.647671   | Copy gain    |
| AGS | chr12 | 6038401  | 6042000  | 1.72957    | Copy gain    |
| AGS | chr12 | 6042001  | 6159600  | 0.646871   | Copy gain    |
| AGS | chr12 | 6159601  | 7017600  | 0.477671   | Copy gain    |
| AGS | chr12 | 7017601  | 7018800  | -1.11333   | Copy loss    |
| AGS | chr12 | 7018801  | 7081200  | 0.364071   | Copy neutral |
| AGS | chr12 | 7081201  | 7189877  | 0.569871   | Copy gain    |
| AGS | chr12 | 7239876  | 7348200  | 0.569871   | Copy gain    |
| AGS | chr12 | 7348201  | 7356600  | 0.300271   | Copy neutral |
| AGS | chr12 | 7356601  | 7780200  | 0.728871   | Copy gain    |
| AGS | chr12 | 7780201  | 7791000  | 0.608471   | Copy gain    |
| AGS | chr12 | 7791001  | 8071200  | 0.381071   | Copy neutral |
| AGS | chr12 | 8071201  | 8299800  | 0.665371   | Copy gain    |
| AGS | chr12 | 8299801  | 8335200  | 0.846871   | Copy gain    |
| AGS | chr12 | 8335201  | 8337600  | -0.0420295 | Copy neutral |
| AGS | chr12 | 8337601  | 8371200  | 1.04187    | Copy gain    |
| AGS | chr12 | 8371201  | 8558400  | 0.592171   | Copy gain    |
| AGS | chr12 | 8558401  | 8567700  | -6.87953   | Copy loss    |
| AGS | chr12 | 8567701  | 8576400  | -3.27503   | Copy loss    |
| AGS | chr12 | 8576401  | 8590500  | -7.48273   | Copy loss    |
| AGS | chr12 | 8590501  | 20937600 | 0.596271   | Copy gain    |
| AGS | chr12 | 20937601 | 20968200 | -1.21063   | Copy loss    |
| AGS | chr12 | 20968201 | 31476600 | 0.605271   | Copy gain    |
| AGS | chr12 | 31476601 | 34856695 | 0.510571   | Copy gain    |
| AGS | chr12 | 37856694 | 43033200 | 0.510571   | Copy gain    |
| AGS | chr12 | 43033201 | 44206200 | 0.624271   | Copy gain    |
| AGS | chr12 | 44206201 | 44497200 | 0.525771   | Copy gain    |
| AGS | chr12 | 44497201 | 44545200 | 0.634571   | Copy gain    |
| AGS | chr12 | 44545201 | 44546400 | -4.65103   | Copy loss    |
| AGS | chr12 | 44546401 | 45903600 | 0.607071   | Copy gain    |
| AGS | chr12 | 45903601 | 45909600 | -8.68153   | Copy loss    |
| AGS | chr12 | 45909601 | 48097800 | 0.675671   | Copy gain    |
| AGS | chr12 | 48097801 | 48149400 | 0.564171   | Copy gain    |
| AGS | chr12 | 48149401 | 48216000 | 0.418671   | Copy neutral |
| AGS | chr12 | 48216001 | 48450600 | 0.586171   | Copy gain    |
| AGS | chr12 | 48450601 | 48451800 | -1.12563   | Copy loss    |
| AGS | chr12 | 48451801 | 48754800 | 0.658071   | Copy gain    |

|     |       |          |          |            |              |
|-----|-------|----------|----------|------------|--------------|
| AGS | chr12 | 48754801 | 48873600 | 0.790071   | Copy gain    |
| AGS | chr12 | 48873601 | 48892800 | 0.626571   | Copy gain    |
| AGS | chr12 | 48892801 | 48895200 | -0.0615295 | Copy neutral |
| AGS | chr12 | 48895201 | 49024200 | 0.698271   | Copy gain    |
| AGS | chr12 | 49024201 | 63341400 | 0.560571   | Copy gain    |
| AGS | chr12 | 63341401 | 71602800 | 0.658971   | Copy gain    |
| AGS | chr12 | 71602801 | 71604000 | -8.76023   | Copy loss    |
| AGS | chr12 | 71604001 | 72356400 | 0.683271   | Copy gain    |
| AGS | chr12 | 72356401 | 72358200 | -1.34173   | Copy loss    |
| AGS | chr12 | 72358201 | 72631200 | 0.645571   | Copy gain    |
| AGS | chr12 | 72631201 | 72986400 | 0.569671   | Copy gain    |
| AGS | chr12 | 72986401 | 74134200 | 0.488471   | Copy gain    |
| AGS | chr12 | 74134201 | 75114600 | 0.545371   | Copy gain    |
| AGS | chr12 | 75114601 | 75470400 | 0.613171   | Copy gain    |
| AGS | chr12 | 75470401 | 76476600 | 0.719171   | Copy gain    |
| AGS | chr12 | 76476601 | 76732800 | 0.619771   | Copy gain    |
| AGS | chr12 | 76732801 | 76942800 | 0.718771   | Copy gain    |
| AGS | chr12 | 76942801 | 78429600 | 0.621771   | Copy gain    |
| AGS | chr12 | 78429601 | 80153400 | 0.562471   | Copy gain    |
| AGS | chr12 | 80153401 | 80939400 | 0.615971   | Copy gain    |
| AGS | chr12 | 80939401 | 82786200 | 0.533571   | Copy gain    |
| AGS | chr12 | 82786201 | 83032800 | 0.577571   | Copy gain    |
| AGS | chr12 | 83032801 | 83034000 | -8.76023   | Copy loss    |
| AGS | chr12 | 83034001 | 83434800 | 0.452871   | Copy gain    |
| AGS | chr12 | 83434801 | 84495000 | 0.563671   | Copy gain    |
| AGS | chr12 | 84495001 | 84592800 | 0.492571   | Copy gain    |
| AGS | chr12 | 84592801 | 84595800 | -0.629029  | Copy loss    |
| AGS | chr12 | 84595801 | 85398600 | 0.512671   | Copy gain    |
| AGS | chr12 | 85398601 | 85585800 | 0.588171   | Copy gain    |
| AGS | chr12 | 85585801 | 85592400 | -0.363929  | Copy neutral |
| AGS | chr12 | 85592401 | 86425800 | 0.585971   | Copy gain    |
| AGS | chr12 | 86425801 | 86433000 | -1.07563   | Copy loss    |
| AGS | chr12 | 86433001 | 87249600 | 0.539171   | Copy gain    |
| AGS | chr12 | 87249601 | 87250800 | -1.36843   | Copy loss    |
| AGS | chr12 | 87250801 | 88178400 | 0.565371   | Copy gain    |
| AGS | chr12 | 88178401 | 89095200 | 0.682371   | Copy gain    |
| AGS | chr12 | 89095201 | 89097600 | -0.274529  | Copy neutral |
| AGS | chr12 | 89097601 | 89681400 | 0.712071   | Copy gain    |
| AGS | chr12 | 89681401 | 89979600 | 0.572671   | Copy gain    |
| AGS | chr12 | 89979601 | 90099600 | 0.666171   | Copy gain    |
| AGS | chr12 | 90099601 | 90104400 | 0.0570705  | Copy neutral |
| AGS | chr12 | 90104401 | 90417600 | 0.667171   | Copy gain    |
| AGS | chr12 | 90417601 | 90486000 | 0.569871   | Copy gain    |
| AGS | chr12 | 90486001 | 90487800 | -8.76023   | Copy loss    |
| AGS | chr12 | 90487801 | 90492000 | -0.933329  | Copy loss    |
| AGS | chr12 | 90492001 | 92901000 | 0.590271   | Copy gain    |
| AGS | chr12 | 92901001 | 93667200 | 0.657571   | Copy gain    |
| AGS | chr12 | 93667201 | 93780600 | 0.499771   | Copy gain    |
| AGS | chr12 | 93780601 | 93962400 | 0.633671   | Copy gain    |
| AGS | chr12 | 93962401 | 93968400 | 0.109771   | Copy neutral |
| AGS | chr12 | 93968401 | 94407000 | 0.659671   | Copy gain    |
| AGS | chr12 | 94407001 | 94408200 | -0.354029  | Copy neutral |

|     |       |           |           |           |              |
|-----|-------|-----------|-----------|-----------|--------------|
| AGS | chr12 | 94408201  | 94484400  | 0.674271  | Copy gain    |
| AGS | chr12 | 94484401  | 94681800  | 0.558571  | Copy gain    |
| AGS | chr12 | 94681801  | 94875600  | 0.681171  | Copy gain    |
| AGS | chr12 | 94875601  | 95433000  | 0.547371  | Copy gain    |
| AGS | chr12 | 95433001  | 95503800  | -1.07903  | Copy loss    |
| AGS | chr12 | 95503801  | 109373471 | 0.559371  | Copy gain    |
| AGS | chr12 | 109423470 | 118419600 | 0.559371  | Copy gain    |
| AGS | chr12 | 118419601 | 121965037 | 0.413571  | Copy neutral |
| AGS | chr12 | 121965236 | 122530624 | 0.413571  | Copy neutral |
| AGS | chr12 | 122580623 | 123928081 | 0.413571  | Copy neutral |
| AGS | chr12 | 123928280 | 123960722 | 0.413571  | Copy neutral |
| AGS | chr12 | 123960821 | 132706993 | 0.413571  | Copy neutral |
| AGS | chr12 | 132806992 | 133624200 | 0.413571  | Copy neutral |
| AGS | chr12 | 133624201 | 133704600 | 0.554471  | Copy gain    |
| AGS | chr12 | 133704601 | 133707600 | -0.105129 | Copy neutral |
| AGS | chr12 | 133707601 | 133774800 | 0.522671  | Copy gain    |
| AGS | chr12 | 133774801 | 133783800 | 0.865871  | Copy gain    |
| AGS | chr12 | 133783801 | 133799400 | 0.456171  | Copy gain    |
| AGS | chr12 | 133799401 | 133802400 | 0.165471  | Copy neutral |
| AGS | chr12 | 133802401 | 133810200 | 0.482871  | Copy gain    |
| AGS | chr12 | 133810201 | 133818000 | 0.160771  | Copy neutral |
| AGS | chr12 | 133818001 | 133841896 | 0.628771  | Copy gain    |
| AGS | chr12 | 133851895 | 133851895 | 0.628771  | Copy gain    |
| AGS | chr13 | 19020000  | 22594200  | 0.369371  | Copy neutral |
| AGS | chr13 | 22594201  | 22595400  | -5.94653  | Copy loss    |
| AGS | chr13 | 22595401  | 23894400  | 0.408371  | Copy neutral |
| AGS | chr13 | 23894401  | 24447000  | 0.509571  | Copy gain    |
| AGS | chr13 | 24447001  | 24929400  | 0.762471  | Copy gain    |
| AGS | chr13 | 24929401  | 25099800  | 0.467271  | Copy gain    |
| AGS | chr13 | 25099801  | 25178400  | 0.633071  | Copy gain    |
| AGS | chr13 | 25178401  | 25329000  | 0.346071  | Copy neutral |
| AGS | chr13 | 25329001  | 27408600  | 0.471871  | Copy gain    |
| AGS | chr13 | 27408601  | 28761000  | 0.748371  | Copy gain    |
| AGS | chr13 | 28761001  | 30132000  | 0.468771  | Copy gain    |
| AGS | chr13 | 30132001  | 30133800  | -1.26273  | Copy loss    |
| AGS | chr13 | 30133801  | 31038600  | 0.494571  | Copy gain    |
| AGS | chr13 | 31038601  | 31039800  | -8.76023  | Copy loss    |
| AGS | chr13 | 31039801  | 38071800  | 0.415771  | Copy neutral |
| AGS | chr13 | 38071801  | 38085600  | -1.19313  | Copy loss    |
| AGS | chr13 | 38085601  | 38325000  | 0.383771  | Copy neutral |
| AGS | chr13 | 38325001  | 38326800  | -0.395629 | Copy neutral |
| AGS | chr13 | 38326801  | 39057600  | 0.404071  | Copy neutral |
| AGS | chr13 | 39057601  | 39060000  | -1.28653  | Copy loss    |
| AGS | chr13 | 39060001  | 40232400  | 0.459371  | Copy gain    |
| AGS | chr13 | 40232401  | 40847400  | 0.537171  | Copy gain    |
| AGS | chr13 | 40847401  | 41225400  | 0.476671  | Copy gain    |
| AGS | chr13 | 41225401  | 41278200  | 0.271071  | Copy neutral |
| AGS | chr13 | 41278201  | 41973600  | 0.472671  | Copy gain    |
| AGS | chr13 | 41973601  | 41975400  | -8.76023  | Copy loss    |
| AGS | chr13 | 41975401  | 45997800  | 0.525771  | Copy gain    |
| AGS | chr13 | 45997801  | 45999000  | -8.76023  | Copy loss    |
| AGS | chr13 | 45999001  | 46981200  | 0.517571  | Copy gain    |

|     |       |           |           |            |              |
|-----|-------|-----------|-----------|------------|--------------|
| AGS | chr13 | 46981201  | 47037000  | 0.825671   | Copy gain    |
| AGS | chr13 | 47037001  | 48286800  | 0.496171   | Copy gain    |
| AGS | chr13 | 48286801  | 48290400  | -2.51003   | Copy loss    |
| AGS | chr13 | 48290401  | 48567600  | 0.407871   | Copy neutral |
| AGS | chr13 | 48567601  | 48597000  | -0.607829  | Copy loss    |
| AGS | chr13 | 48597001  | 48896400  | 0.405071   | Copy neutral |
| AGS | chr13 | 48896401  | 49533600  | 0.517071   | Copy gain    |
| AGS | chr13 | 49533601  | 49536600  | -1.40373   | Copy loss    |
| AGS | chr13 | 49536601  | 49783800  | 0.558971   | Copy gain    |
| AGS | chr13 | 49783801  | 49923600  | 0.434971   | Copy neutral |
| AGS | chr13 | 49923601  | 50063400  | 0.551071   | Copy gain    |
| AGS | chr13 | 50063401  | 50988000  | 0.429271   | Copy neutral |
| AGS | chr13 | 50988001  | 51069600  | 0.499971   | Copy gain    |
| AGS | chr13 | 51069601  | 51075000  | -8.76023   | Copy loss    |
| AGS | chr13 | 51075001  | 53361000  | 0.511471   | Copy gain    |
| AGS | chr13 | 53361001  | 60250200  | 0.326871   | Copy neutral |
| AGS | chr13 | 60250201  | 62217600  | 0.429571   | Copy neutral |
| AGS | chr13 | 62217601  | 63712800  | 0.705271   | Copy gain    |
| AGS | chr13 | 63712801  | 66112200  | 0.370571   | Copy neutral |
| AGS | chr13 | 66112201  | 70189200  | 0.327271   | Copy neutral |
| AGS | chr13 | 70189201  | 70210200  | 0.461871   | Copy gain    |
| AGS | chr13 | 70210201  | 70216200  | 0.193971   | Copy neutral |
| AGS | chr13 | 70216201  | 70219800  | 0.581271   | Copy gain    |
| AGS | chr13 | 70219801  | 70231200  | 0.826471   | Copy gain    |
| AGS | chr13 | 70231201  | 71430000  | 0.369771   | Copy neutral |
| AGS | chr13 | 71430001  | 72438000  | 0.434671   | Copy neutral |
| AGS | chr13 | 72438001  | 72444600  | -0.0805295 | Copy neutral |
| AGS | chr13 | 72444601  | 72843600  | 0.434671   | Copy neutral |
| AGS | chr13 | 72843601  | 72845400  | -3.26393   | Copy loss    |
| AGS | chr13 | 72845401  | 72846600  | -8.76023   | Copy loss    |
| AGS | chr13 | 72846601  | 81547200  | 0.469971   | Copy gain    |
| AGS | chr13 | 81547201  | 86760325  | 0.373771   | Copy neutral |
| AGS | chr13 | 86910324  | 91987800  | 0.373771   | Copy neutral |
| AGS | chr13 | 91987801  | 91999800  | 0.567971   | Copy gain    |
| AGS | chr13 | 91999801  | 92001000  | -8.76023   | Copy loss    |
| AGS | chr13 | 92001001  | 109338000 | 0.432671   | Copy neutral |
| AGS | chr13 | 109338001 | 109674000 | 0.781071   | Copy gain    |
| AGS | chr13 | 109674001 | 109676400 | -0.274329  | Copy neutral |
| AGS | chr13 | 109676401 | 109869000 | 0.771471   | Copy gain    |
| AGS | chr13 | 109869001 | 109871400 | -0.417829  | Copy neutral |
| AGS | chr13 | 109871401 | 110121600 | 0.745071   | Copy gain    |
| AGS | chr13 | 110121601 | 110437800 | 0.411871   | Copy neutral |
| AGS | chr13 | 110437801 | 110439600 | -8.76023   | Copy loss    |
| AGS | chr13 | 110439601 | 112353995 | 0.386071   | Copy neutral |
| AGS | chr13 | 112503994 | 114325994 | 0.386071   | Copy neutral |
| AGS | chr13 | 114425993 | 114639949 | 0.386071   | Copy neutral |
| AGS | chr13 | 114739948 | 115109879 | 0.386071   | Copy neutral |
| AGS | chr13 | 115169878 | 115169878 | 0.386071   | Copy neutral |
| AGS | chr14 | 19000000  | 19047600  | 1.82207    | Copy gain    |
| AGS | chr14 | 19047601  | 19108800  | 1.30797    | Copy gain    |
| AGS | chr14 | 19108801  | 19110600  | 0.363171   | Copy neutral |
| AGS | chr14 | 19110601  | 19111800  | 1.13677    | Copy gain    |

|     |       |          |          |           |              |
|-----|-------|----------|----------|-----------|--------------|
| AGS | chr14 | 19111801 | 19123200 | 1.55797   | Copy gain    |
| AGS | chr14 | 19123201 | 19138500 | 1.12737   | Copy gain    |
| AGS | chr14 | 19138501 | 21952800 | 0.635971  | Copy gain    |
| AGS | chr14 | 21952801 | 21954600 | -8.76023  | Copy loss    |
| AGS | chr14 | 21954601 | 22117800 | 0.479671  | Copy gain    |
| AGS | chr14 | 22117801 | 22973400 | 0.690571  | Copy gain    |
| AGS | chr14 | 22973401 | 23107200 | 0.570371  | Copy gain    |
| AGS | chr14 | 23107201 | 23110800 | -0.798529 | Copy loss    |
| AGS | chr14 | 23110801 | 23132400 | 0.559371  | Copy gain    |
| AGS | chr14 | 23132401 | 23182200 | 0.770371  | Copy gain    |
| AGS | chr14 | 23182201 | 24129600 | 0.502371  | Copy gain    |
| AGS | chr14 | 24129601 | 24502800 | 0.686271  | Copy gain    |
| AGS | chr14 | 24502801 | 24913800 | 0.463971  | Copy gain    |
| AGS | chr14 | 24913801 | 25698000 | 0.626371  | Copy gain    |
| AGS | chr14 | 25698001 | 25861800 | 0.528371  | Copy gain    |
| AGS | chr14 | 25861801 | 30709800 | 0.450371  | Copy gain    |
| AGS | chr14 | 30709801 | 37770000 | 0.593071  | Copy gain    |
| AGS | chr14 | 37770001 | 37771200 | -8.76023  | Copy loss    |
| AGS | chr14 | 37771201 | 38052000 | 0.544771  | Copy gain    |
| AGS | chr14 | 38052001 | 38070000 | 0.113871  | Copy neutral |
| AGS | chr14 | 38070001 | 39102000 | 0.550871  | Copy gain    |
| AGS | chr14 | 39102001 | 39517200 | 0.651171  | Copy gain    |
| AGS | chr14 | 39517201 | 39770400 | 0.491171  | Copy gain    |
| AGS | chr14 | 39770401 | 40419000 | 0.614271  | Copy gain    |
| AGS | chr14 | 40419001 | 44865000 | 0.472271  | Copy gain    |
| AGS | chr14 | 44865001 | 44871000 | -1.78433  | Copy loss    |
| AGS | chr14 | 44871001 | 45338400 | 0.532071  | Copy gain    |
| AGS | chr14 | 45338401 | 48316800 | 0.484571  | Copy gain    |
| AGS | chr14 | 48316801 | 49358400 | 0.525371  | Copy gain    |
| AGS | chr14 | 49358401 | 67518000 | 0.613971  | Copy gain    |
| AGS | chr14 | 67518001 | 67765200 | -1.61323  | Copy loss    |
| AGS | chr14 | 67765201 | 68103000 | 0.558671  | Copy gain    |
| AGS | chr14 | 68103001 | 68341200 | 0.603671  | Copy gain    |
| AGS | chr14 | 68341201 | 68724600 | 0.730671  | Copy gain    |
| AGS | chr14 | 68724601 | 70896000 | 0.604471  | Copy gain    |
| AGS | chr14 | 70896001 | 71106000 | 0.722071  | Copy gain    |
| AGS | chr14 | 71106001 | 71379600 | 0.576171  | Copy gain    |
| AGS | chr14 | 71379601 | 71565000 | 0.756971  | Copy gain    |
| AGS | chr14 | 71565001 | 73003800 | 0.606971  | Copy gain    |
| AGS | chr14 | 73003801 | 82499400 | 0.515571  | Copy gain    |
| AGS | chr14 | 82499401 | 82503000 | -8.76023  | Copy loss    |
| AGS | chr14 | 82503001 | 83140800 | 0.422171  | Copy neutral |
| AGS | chr14 | 83140801 | 83143200 | -0.644429 | Copy loss    |
| AGS | chr14 | 83143201 | 84061800 | 0.429471  | Copy neutral |
| AGS | chr14 | 84061801 | 87785400 | 0.526971  | Copy gain    |
| AGS | chr14 | 87785401 | 88938000 | 0.598071  | Copy gain    |
| AGS | chr14 | 88938001 | 89092800 | 0.497071  | Copy gain    |
| AGS | chr14 | 89092801 | 89257800 | 0.632971  | Copy gain    |
| AGS | chr14 | 89257801 | 89262000 | 0.302871  | Copy neutral |
| AGS | chr14 | 89262001 | 89263200 | -4.93973  | Copy loss    |
| AGS | chr14 | 89263201 | 93625200 | 0.515371  | Copy gain    |
| AGS | chr14 | 93625201 | 93626400 | -5.23023  | Copy loss    |

|     |       |           |           |             |              |
|-----|-------|-----------|-----------|-------------|--------------|
| AGS | chr14 | 93626401  | 93712800  | 0.429471    | Copy neutral |
| AGS | chr14 | 93712801  | 94171200  | 0.611871    | Copy gain    |
| AGS | chr14 | 94171201  | 94254000  | 0.424571    | Copy neutral |
| AGS | chr14 | 94254001  | 94255800  | -0.122529   | Copy neutral |
| AGS | chr14 | 94255801  | 94259400  | 0.659071    | Copy gain    |
| AGS | chr14 | 94259401  | 94275000  | 0.492771    | Copy gain    |
| AGS | chr14 | 94275001  | 94288800  | 0.666271    | Copy gain    |
| AGS | chr14 | 94288801  | 94295400  | 0.337071    | Copy neutral |
| AGS | chr14 | 94295401  | 94358400  | 0.541971    | Copy gain    |
| AGS | chr14 | 94358401  | 94370400  | 0.339571    | Copy neutral |
| AGS | chr14 | 94370401  | 94392000  | 0.551071    | Copy gain    |
| AGS | chr14 | 94392001  | 94520400  | 0.404871    | Copy neutral |
| AGS | chr14 | 94520401  | 94542600  | 0.700271    | Copy gain    |
| AGS | chr14 | 94542601  | 94610400  | 0.494371    | Copy gain    |
| AGS | chr14 | 94610401  | 94612200  | -0.744529   | Copy loss    |
| AGS | chr14 | 94612201  | 94630800  | 0.661971    | Copy gain    |
| AGS | chr14 | 94630801  | 94633200  | 0.257471    | Copy neutral |
| AGS | chr14 | 94633201  | 94639200  | 0.669171    | Copy gain    |
| AGS | chr14 | 94639201  | 94642200  | 0.126671    | Copy neutral |
| AGS | chr14 | 94642201  | 94749600  | 0.717071    | Copy gain    |
| AGS | chr14 | 94749601  | 95006400  | 0.530371    | Copy gain    |
| AGS | chr14 | 95006401  | 95361000  | 0.414271    | Copy neutral |
| AGS | chr14 | 95361001  | 97379400  | 0.540671    | Copy gain    |
| AGS | chr14 | 97379401  | 106061700 | 0.429071    | Copy neutral |
| AGS | chr14 | 106061701 | 106068000 | 0.571971    | Copy gain    |
| AGS | chr14 | 106068001 | 106119600 | 0.988471    | Copy gain    |
| AGS | chr14 | 106119601 | 106127400 | 1.71297     | Copy gain    |
| AGS | chr14 | 106127401 | 106173000 | 1.03437     | Copy gain    |
| AGS | chr14 | 106173001 | 106303200 | 0.572771    | Copy gain    |
| AGS | chr14 | 106303201 | 106334400 | 0.284171    | Copy neutral |
| AGS | chr14 | 106334401 | 106344000 | 0.710071    | Copy gain    |
| AGS | chr14 | 106344001 | 106387800 | 0.338571    | Copy neutral |
| AGS | chr14 | 106387801 | 106449000 | 0.560071    | Copy gain    |
| AGS | chr14 | 106449001 | 106450800 | -0.976029   | Copy loss    |
| AGS | chr14 | 106450801 | 106479000 | 0.481171    | Copy gain    |
| AGS | chr14 | 106479001 | 106778400 | 0.666371    | Copy gain    |
| AGS | chr14 | 106778401 | 106799400 | 0.363171    | Copy neutral |
| AGS | chr14 | 106799401 | 106815300 | -1.19253    | Copy loss    |
| AGS | chr14 | 106815301 | 106824000 | -0.168529   | Copy neutral |
| AGS | chr14 | 106824001 | 106854000 | 0.655371    | Copy gain    |
| AGS | chr14 | 106854001 | 106856400 | -0.331629   | Copy neutral |
| AGS | chr14 | 106856401 | 106877400 | 0.614171    | Copy gain    |
| AGS | chr14 | 106877401 | 106919400 | 0.286371    | Copy neutral |
| AGS | chr14 | 106919401 | 107148600 | 0.560971    | Copy gain    |
| AGS | chr14 | 107148601 | 107182800 | 1.42187     | Copy gain    |
| AGS | chr14 | 107182801 | 107289541 | 0.550171    | Copy gain    |
| AGS | chr14 | 107349540 | 107349540 | 0.550171    | Copy gain    |
| AGS | chr15 | 20000000  | 20027400  | 0.892771    | Copy gain    |
| AGS | chr15 | 20027401  | 20105400  | 0.412971    | Copy neutral |
| AGS | chr15 | 20105401  | 20148600  | 1.27307     | Copy gain    |
| AGS | chr15 | 20148601  | 20200800  | -0.00352946 | Copy neutral |
| AGS | chr15 | 20200801  | 20386200  | 0.450371    | Copy gain    |



|     |       |          |          |              |              |
|-----|-------|----------|----------|--------------|--------------|
| AGS | chr15 | 20386201 | 20528400 | 1.15127      | Copy gain    |
| AGS | chr15 | 20528401 | 20545800 | 0.587371     | Copy gain    |
| AGS | chr15 | 20545801 | 20549400 | -0.0884295   | Copy neutral |
| AGS | chr15 | 20549401 | 20564400 | 0.825971     | Copy gain    |
| AGS | chr15 | 20564401 | 20581200 | 1.56567      | Copy gain    |
| AGS | chr15 | 20581201 | 20588400 | 0.847071     | Copy gain    |
| AGS | chr15 | 20588401 | 20636100 | 1.56407      | Copy gain    |
| AGS | chr15 | 20636101 | 20840700 | -0.0351295   | Copy neutral |
| AGS | chr15 | 20840701 | 20885700 | 1.47187      | Copy gain    |
| AGS | chr15 | 20885701 | 20894634 | 0.452471     | Copy gain    |
| AGS | chr15 | 20935075 | 20949600 | 1.37337      | Copy gain    |
| AGS | chr15 | 20949601 | 20964000 | -0.306129    | Copy neutral |
| AGS | chr15 | 20964001 | 21269700 | 0.744671     | Copy gain    |
| AGS | chr15 | 21269701 | 21398820 | -0.0948295   | Copy neutral |
| AGS | chr15 | 21885000 | 21892500 | -0.0948295   | Copy neutral |
| AGS | chr15 | 21892501 | 21900000 | 0.884171     | Copy gain    |
| AGS | chr15 | 21900001 | 21903600 | 1.46657      | Copy gain    |
| AGS | chr15 | 21903601 | 21906000 | 0.715071     | Copy gain    |
| AGS | chr15 | 21906001 | 21942600 | 1.44827      | Copy gain    |
| AGS | chr15 | 21942601 | 21953400 | -0.652829    | Copy loss    |
| AGS | chr15 | 21953401 | 22069800 | 0.849571     | Copy gain    |
| AGS | chr15 | 22069801 | 22212115 | 0.241871     | Copy neutral |
| AGS | chr15 | 22262114 | 22596194 | 0.241871     | Copy neutral |
| AGS | chr15 | 22646193 | 22800600 | 0.241871     | Copy neutral |
| AGS | chr15 | 22800601 | 23119500 | -0.121729    | Copy neutral |
| AGS | chr15 | 23119501 | 23514854 | 0.0930705    | Copy neutral |
| AGS | chr15 | 23564853 | 23616000 | 0.0930705    | Copy neutral |
| AGS | chr15 | 23616001 | 23671800 | -0.101029    | Copy neutral |
| AGS | chr15 | 23671801 | 23673000 | -8.76023     | Copy loss    |
| AGS | chr15 | 23673001 | 23685600 | -0.366029    | Copy neutral |
| AGS | chr15 | 23685601 | 25035600 | -0.113429    | Copy neutral |
| AGS | chr15 | 25035601 | 25117200 | -0.303029    | Copy neutral |
| AGS | chr15 | 25117201 | 25118400 | -8.76023     | Copy loss    |
| AGS | chr15 | 25118401 | 29159444 | -0.129429    | Copy neutral |
| AGS | chr15 | 29209443 | 29901000 | -0.129429    | Copy neutral |
| AGS | chr15 | 29901001 | 30372000 | 0.00677054   | Copy neutral |
| AGS | chr15 | 30372001 | 30735900 | 0.405571     | Copy neutral |
| AGS | chr15 | 30735901 | 31073400 | 0.149971     | Copy neutral |
| AGS | chr15 | 31073401 | 31618800 | 0.0111705    | Copy neutral |
| AGS | chr15 | 31618801 | 31620000 | -8.76023     | Copy loss    |
| AGS | chr15 | 31620001 | 34717800 | 0.00617054   | Copy neutral |
| AGS | chr15 | 34717801 | 34859100 | -0.955529    | Copy loss    |
| AGS | chr15 | 34859101 | 35238000 | 0.0358705    | Copy neutral |
| AGS | chr15 | 35238001 | 35375400 | -0.175029    | Copy neutral |
| AGS | chr15 | 35375401 | 37912800 | 0.0184705    | Copy neutral |
| AGS | chr15 | 37912801 | 40654200 | 0.108871     | Copy neutral |
| AGS | chr15 | 40654201 | 40869000 | 0.0271705    | Copy neutral |
| AGS | chr15 | 40869001 | 41945400 | -0.0406295   | Copy neutral |
| AGS | chr15 | 41945401 | 44031600 | 0.0603705    | Copy neutral |
| AGS | chr15 | 44031601 | 44169000 | -0.0779295   | Copy neutral |
| AGS | chr15 | 44169001 | 44495400 | 0.0953705    | Copy neutral |
| AGS | chr15 | 44495401 | 44958000 | -0.000929464 | Copy neutral |

|     |       |           |           |            |              |
|-----|-------|-----------|-----------|------------|--------------|
| AGS | chr15 | 44958001  | 45426000  | 0.152771   | Copy neutral |
| AGS | chr15 | 45426001  | 46365000  | 0.0362705  | Copy neutral |
| AGS | chr15 | 46365001  | 46540200  | -0.0144295 | Copy neutral |
| AGS | chr15 | 46540201  | 47347200  | -0.123029  | Copy neutral |
| AGS | chr15 | 47347201  | 47404800  | 0.0492705  | Copy neutral |
| AGS | chr15 | 47404801  | 48307800  | -0.131529  | Copy neutral |
| AGS | chr15 | 48307801  | 48662400  | -0.0420295 | Copy neutral |
| AGS | chr15 | 48662401  | 53211600  | 0.0511705  | Copy neutral |
| AGS | chr15 | 53211601  | 56408400  | -0.0687295 | Copy neutral |
| AGS | chr15 | 56408401  | 72386400  | 0.0702705  | Copy neutral |
| AGS | chr15 | 72386401  | 72387600  | -8.76023   | Copy loss    |
| AGS | chr15 | 72387601  | 81835200  | 0.0593705  | Copy neutral |
| AGS | chr15 | 81835201  | 82829646  | -0.0270295 | Copy neutral |
| AGS | chr15 | 82879645  | 84984474  | -0.0270295 | Copy neutral |
| AGS | chr15 | 85034473  | 99664800  | -0.0270295 | Copy neutral |
| AGS | chr15 | 99664801  | 102482700 | 0.0730705  | Copy neutral |
| AGS | chr15 | 102482701 | 102521393 | 1.09357    | Copy gain    |
| AGS | chr15 | 102531392 | 102531392 | 1.09357    | Copy gain    |
| AGS | chr16 | 60000     | 8636922   | -0.0419295 | Copy neutral |
| AGS | chr16 | 8686921   | 22500300  | -0.0419295 | Copy neutral |
| AGS | chr16 | 22500301  | 22710600  | 1.07887    | Copy gain    |
| AGS | chr16 | 22710601  | 28863600  | -0.0514295 | Copy neutral |
| AGS | chr16 | 28863601  | 28867800  | -1.53573   | Copy loss    |
| AGS | chr16 | 28867801  | 31413000  | 0.481071   | Copy gain    |
| AGS | chr16 | 31413001  | 32051400  | 0.0438705  | Copy neutral |
| AGS | chr16 | 32051401  | 32133000  | 0.515371   | Copy gain    |
| AGS | chr16 | 32133001  | 33635100  | 0.990171   | Copy gain    |
| AGS | chr16 | 33635101  | 33915000  | 0.389271   | Copy neutral |
| AGS | chr16 | 33915001  | 33918000  | 1.22467    | Copy gain    |
| AGS | chr16 | 33918001  | 33970800  | 1.98907    | Copy gain    |
| AGS | chr16 | 33970801  | 33976800  | 3.94047    | Copy gain    |
| AGS | chr16 | 33976801  | 33981600  | 1.97767    | Copy gain    |
| AGS | chr16 | 33981601  | 33990000  | 3.08097    | Copy gain    |
| AGS | chr16 | 33990001  | 33996000  | 1.90797    | Copy gain    |
| AGS | chr16 | 33996001  | 34023151  | 1.00617    | Copy gain    |
| AGS | chr16 | 34173150  | 34197000  | 1.00617    | Copy gain    |
| AGS | chr16 | 34197001  | 34299000  | -0.227729  | Copy neutral |
| AGS | chr16 | 34299001  | 34776000  | -0.0823295 | Copy neutral |
| AGS | chr16 | 34776001  | 34782000  | -0.640329  | Copy loss    |
| AGS | chr16 | 34782001  | 35229000  | -0.0766295 | Copy neutral |
| AGS | chr16 | 35229001  | 35233200  | 1.03947    | Copy gain    |
| AGS | chr16 | 35233201  | 35238600  | 0.105771   | Copy neutral |
| AGS | chr16 | 35238601  | 35246700  | 1.11777    | Copy gain    |
| AGS | chr16 | 35246701  | 35251500  | 2.08567    | Copy gain    |
| AGS | chr16 | 35251501  | 35285100  | 0.212571   | Copy neutral |
| AGS | chr16 | 46386300  | 46408200  | 7.68967    | Copy gain    |
| AGS | chr16 | 46408201  | 46435800  | 5.14467    | Copy gain    |
| AGS | chr16 | 46435801  | 46460400  | 0.893171   | Copy gain    |
| AGS | chr16 | 46460401  | 46462800  | -0.492929  | Copy loss    |
| AGS | chr16 | 46462801  | 46500600  | 1.31707    | Copy gain    |
| AGS | chr16 | 46500601  | 53164200  | 0.00997054 | Copy neutral |
| AGS | chr16 | 53164201  | 53165400  | -8.76023   | Copy loss    |

|     |       |          |          |             |              |
|-----|-------|----------|----------|-------------|--------------|
| AGS | chr16 | 53165401 | 59206200 | 0.0259705   | Copy neutral |
| AGS | chr16 | 59206201 | 60177600 | -0.139129   | Copy neutral |
| AGS | chr16 | 60177601 | 62470200 | -0.218129   | Copy neutral |
| AGS | chr16 | 62470201 | 62544000 | -0.141829   | Copy neutral |
| AGS | chr16 | 62544001 | 62550600 | -1.31473    | Copy loss    |
| AGS | chr16 | 62550601 | 63340200 | -0.164729   | Copy neutral |
| AGS | chr16 | 63340201 | 68302200 | 0.00117054  | Copy neutral |
| AGS | chr16 | 68302201 | 68385000 | -0.842629   | Copy loss    |
| AGS | chr16 | 68385001 | 68418600 | -0.447529   | Copy neutral |
| AGS | chr16 | 68418601 | 68478600 | -0.678529   | Copy loss    |
| AGS | chr16 | 68478601 | 68483400 | -0.398329   | Copy neutral |
| AGS | chr16 | 68483401 | 68764800 | -0.816429   | Copy loss    |
| AGS | chr16 | 68764801 | 68766000 | -5.01503    | Copy loss    |
| AGS | chr16 | 68766001 | 68931000 | -0.936429   | Copy loss    |
| AGS | chr16 | 68931001 | 70155600 | -0.0176295  | Copy neutral |
| AGS | chr16 | 70155601 | 70201500 | 1.22577     | Copy gain    |
| AGS | chr16 | 70201501 | 70878900 | 0.0135705   | Copy neutral |
| AGS | chr16 | 70878901 | 70977600 | 1.25817     | Copy gain    |
| AGS | chr16 | 70977601 | 70980000 | 0.105271    | Copy neutral |
| AGS | chr16 | 70980001 | 71202600 | 1.34377     | Copy gain    |
| AGS | chr16 | 71202601 | 78166800 | 0.00217054  | Copy neutral |
| AGS | chr16 | 78166801 | 78320400 | -0.587429   | Copy loss    |
| AGS | chr16 | 78320401 | 78367800 | -0.126329   | Copy neutral |
| AGS | chr16 | 78367801 | 78553200 | -1.15483    | Copy loss    |
| AGS | chr16 | 78553201 | 78649800 | -8.71413    | Copy loss    |
| AGS | chr16 | 78649801 | 78657000 | -1.21083    | Copy loss    |
| AGS | chr16 | 78657001 | 78665400 | -8.76023    | Copy loss    |
| AGS | chr16 | 78665401 | 78677400 | -1.05553    | Copy loss    |
| AGS | chr16 | 78677401 | 78697200 | -8.71283    | Copy loss    |
| AGS | chr16 | 78697201 | 78702600 | -1.19113    | Copy loss    |
| AGS | chr16 | 78702601 | 78791400 | -8.68123    | Copy loss    |
| AGS | chr16 | 78791401 | 88389384 | -0.00802946 | Copy neutral |
| AGS | chr16 | 88439383 | 90294754 | -0.00802946 | Copy neutral |
| AGS | chr16 | 90354753 | 90354753 | -0.00802946 | Copy neutral |
| AGS | chr17 | 1        | 296627   | -0.0374295  | Copy neutral |
| AGS | chr17 | 396626   | 14190000 | -0.0374295  | Copy neutral |
| AGS | chr17 | 14190001 | 14191200 | -8.76023    | Copy loss    |
| AGS | chr17 | 14191201 | 21193800 | 0.0467705   | Copy neutral |
| AGS | chr17 | 21193801 | 21208200 | 0.504171    | Copy gain    |
| AGS | chr17 | 21208201 | 21212400 | 0.986271    | Copy gain    |
| AGS | chr17 | 21212401 | 21222600 | 0.491271    | Copy gain    |
| AGS | chr17 | 21222601 | 21254400 | 1.13947     | Copy gain    |
| AGS | chr17 | 21254401 | 21303000 | 0.0101705   | Copy neutral |
| AGS | chr17 | 21303001 | 21318000 | 1.04157     | Copy gain    |
| AGS | chr17 | 21318001 | 21322800 | 0.397871    | Copy neutral |
| AGS | chr17 | 21322801 | 21354600 | 1.05237     | Copy gain    |
| AGS | chr17 | 21354601 | 21506400 | 0.0669705   | Copy neutral |
| AGS | chr17 | 21506401 | 21513600 | 1.08567     | Copy gain    |
| AGS | chr17 | 21513601 | 21517200 | 0.0243705   | Copy neutral |
| AGS | chr17 | 21517201 | 21545400 | 1.02877     | Copy gain    |
| AGS | chr17 | 21545401 | 21566609 | 1.51587     | Copy gain    |
| AGS | chr17 | 21666608 | 21685800 | 1.51587     | Copy gain    |

|     |       |          |          |            |              |
|-----|-------|----------|----------|------------|--------------|
| AGS | chr17 | 21685801 | 21706200 | -0.128329  | Copy neutral |
| AGS | chr17 | 21706201 | 21708000 | -0.676129  | Copy loss    |
| AGS | chr17 | 21708001 | 21724800 | -0.0810295 | Copy neutral |
| AGS | chr17 | 21724801 | 21760200 | -0.409829  | Copy neutral |
| AGS | chr17 | 21760201 | 21817200 | -0.101029  | Copy neutral |
| AGS | chr17 | 21817201 | 21822600 | 0.225871   | Copy neutral |
| AGS | chr17 | 21822601 | 21829200 | 0.00437054 | Copy neutral |
| AGS | chr17 | 21829201 | 21880800 | -0.295429  | Copy neutral |
| AGS | chr17 | 21880801 | 21901800 | -0.0362295 | Copy neutral |
| AGS | chr17 | 21901801 | 21907500 | 2.33577    | Copy gain    |
| AGS | chr17 | 21907501 | 21951600 | -0.142429  | Copy neutral |
| AGS | chr17 | 21951601 | 21953400 | -0.906729  | Copy loss    |
| AGS | chr17 | 21953401 | 22207200 | -0.0870295 | Copy neutral |
| AGS | chr17 | 22207201 | 22213200 | 0.483771   | Copy gain    |
| AGS | chr17 | 22213201 | 22244400 | -0.0617295 | Copy neutral |
| AGS | chr17 | 22244401 | 22261800 | 6.27537    | Copy gain    |
| AGS | chr17 | 22261801 | 22263007 | 2.36637    | Copy gain    |
| AGS | chr17 | 25263006 | 25289400 | 2.36637    | Copy gain    |
| AGS | chr17 | 25289401 | 25296000 | 1.29097    | Copy gain    |
| AGS | chr17 | 25296001 | 25307400 | 2.39957    | Copy gain    |
| AGS | chr17 | 25307401 | 34675849 | 0.0272705  | Copy neutral |
| AGS | chr17 | 34725848 | 36277200 | 0.0272705  | Copy neutral |
| AGS | chr17 | 36277201 | 36371400 | 2.18727    | Copy gain    |
| AGS | chr17 | 36371401 | 36401400 | 1.79607    | Copy gain    |
| AGS | chr17 | 36401401 | 36406200 | 2.33817    | Copy gain    |
| AGS | chr17 | 36406201 | 42296400 | 0.0206705  | Copy neutral |
| AGS | chr17 | 42296401 | 42297600 | -8.76023   | Copy loss    |
| AGS | chr17 | 42297601 | 44164800 | 0.0168705  | Copy neutral |
| AGS | chr17 | 44164801 | 44778300 | 0.788171   | Copy gain    |
| AGS | chr17 | 44778301 | 45212400 | 0.0469705  | Copy neutral |
| AGS | chr17 | 45212401 | 45214800 | 2.36817    | Copy gain    |
| AGS | chr17 | 45214801 | 46564800 | 0.0897705  | Copy neutral |
| AGS | chr17 | 46564801 | 47499000 | -0.0353295 | Copy neutral |
| AGS | chr17 | 47499001 | 47646000 | 0.0345705  | Copy neutral |
| AGS | chr17 | 47646001 | 47647200 | -2.72553   | Copy loss    |
| AGS | chr17 | 47647201 | 50100600 | 0.0348705  | Copy neutral |
| AGS | chr17 | 50100601 | 53076600 | -0.134429  | Copy neutral |
| AGS | chr17 | 53076601 | 55687800 | 0.0308705  | Copy neutral |
| AGS | chr17 | 55687801 | 55689600 | -8.76023   | Copy loss    |
| AGS | chr17 | 55689601 | 60555600 | 0.0430705  | Copy neutral |
| AGS | chr17 | 60555601 | 60556800 | -8.76023   | Copy loss    |
| AGS | chr17 | 60556801 | 62410761 | 0.0130705  | Copy neutral |
| AGS | chr17 | 62460760 | 77546462 | 0.0130705  | Copy neutral |
| AGS | chr17 | 77596461 | 79709050 | 0.0130705  | Copy neutral |
| AGS | chr17 | 79759049 | 81037200 | 0.0130705  | Copy neutral |
| AGS | chr17 | 81037201 | 81039000 | -8.76023   | Copy loss    |
| AGS | chr17 | 81039001 | 81088800 | -0.0257295 | Copy neutral |
| AGS | chr17 | 81088801 | 81140400 | 0.111071   | Copy neutral |
| AGS | chr17 | 81140401 | 81148800 | -0.0576295 | Copy neutral |
| AGS | chr17 | 81148801 | 81195210 | 0.345771   | Copy neutral |
| AGS | chr18 | 10000    | 12600    | -0.0768295 | Copy neutral |
| AGS | chr18 | 12601    | 55200    | 0.988471   | Copy gain    |

|     |       |          |          |            |              |
|-----|-------|----------|----------|------------|--------------|
| AGS | chr18 | 55201    | 106200   | 0.460371   | Copy gain    |
| AGS | chr18 | 106201   | 111600   | 6.88647    | Copy gain    |
| AGS | chr18 | 111601   | 828000   | 0.432571   | Copy neutral |
| AGS | chr18 | 828001   | 829200   | -1.51003   | Copy loss    |
| AGS | chr18 | 829201   | 904200   | 0.378271   | Copy neutral |
| AGS | chr18 | 904201   | 910200   | -0.0331295 | Copy neutral |
| AGS | chr18 | 910201   | 1377600  | 0.476071   | Copy gain    |
| AGS | chr18 | 1377601  | 15410899 | -0.120129  | Copy neutral |
| AGS | chr18 | 18510898 | 18516600 | 4.52297    | Copy gain    |
| AGS | chr18 | 18516601 | 18520800 | 7.46227    | Copy gain    |
| AGS | chr18 | 18520801 | 21990600 | 0.0186705  | Copy neutral |
| AGS | chr18 | 21990601 | 21991800 | -5.83033   | Copy loss    |
| AGS | chr18 | 21991801 | 22492800 | -0.0577295 | Copy neutral |
| AGS | chr18 | 22492801 | 23043600 | -0.181529  | Copy neutral |
| AGS | chr18 | 23043601 | 23800200 | -1.13053   | Copy loss    |
| AGS | chr18 | 23800201 | 24600600 | -1.01723   | Copy loss    |
| AGS | chr18 | 24600601 | 25435200 | -1.13463   | Copy loss    |
| AGS | chr18 | 25435201 | 25436400 | -8.76023   | Copy loss    |
| AGS | chr18 | 25436401 | 27175200 | -1.12323   | Copy loss    |
| AGS | chr18 | 27175201 | 27176400 | -8.76023   | Copy loss    |
| AGS | chr18 | 27176401 | 27814800 | -1.14513   | Copy loss    |
| AGS | chr18 | 27814801 | 27816600 | -7.91423   | Copy loss    |
| AGS | chr18 | 27816601 | 30735600 | -1.03173   | Copy loss    |
| AGS | chr18 | 30735601 | 32262600 | -1.15763   | Copy loss    |
| AGS | chr18 | 32262601 | 33877200 | -0.966629  | Copy loss    |
| AGS | chr18 | 33877201 | 33878400 | -8.76023   | Copy loss    |
| AGS | chr18 | 33878401 | 34394400 | -0.929729  | Copy loss    |
| AGS | chr18 | 34394401 | 34785000 | -1.09363   | Copy loss    |
| AGS | chr18 | 34785001 | 34827600 | -0.964529  | Copy loss    |
| AGS | chr18 | 34827601 | 35136600 | -0.647629  | Copy loss    |
| AGS | chr18 | 35136601 | 35143800 | -1.19423   | Copy loss    |
| AGS | chr18 | 35143801 | 35161800 | -0.739929  | Copy loss    |
| AGS | chr18 | 35161801 | 38865000 | -1.11793   | Copy loss    |
| AGS | chr18 | 38865001 | 38868000 | -8.76023   | Copy loss    |
| AGS | chr18 | 38868001 | 39585600 | -1.05613   | Copy loss    |
| AGS | chr18 | 39585601 | 39586800 | -5.17773   | Copy loss    |
| AGS | chr18 | 39586801 | 40022400 | -1.13673   | Copy loss    |
| AGS | chr18 | 40022401 | 41000400 | -1.22573   | Copy loss    |
| AGS | chr18 | 41000401 | 41940600 | -1.09693   | Copy loss    |
| AGS | chr18 | 41940601 | 41941800 | -8.76023   | Copy loss    |
| AGS | chr18 | 41941801 | 43035600 | -1.07093   | Copy loss    |
| AGS | chr18 | 43035601 | 45532800 | -0.905529  | Copy loss    |
| AGS | chr18 | 45532801 | 46589400 | -0.707729  | Copy loss    |
| AGS | chr18 | 46589401 | 47074800 | -0.921029  | Copy loss    |
| AGS | chr18 | 47074801 | 47541600 | -0.773429  | Copy loss    |
| AGS | chr18 | 47541601 | 47763600 | -0.851829  | Copy loss    |
| AGS | chr18 | 47763601 | 47783400 | -1.15143   | Copy loss    |
| AGS | chr18 | 47783401 | 47789400 | -0.864329  | Copy loss    |
| AGS | chr18 | 47789401 | 47814600 | -0.579829  | Copy loss    |
| AGS | chr18 | 47814601 | 48129000 | -0.898229  | Copy loss    |
| AGS | chr18 | 48129001 | 48196200 | -0.727729  | Copy loss    |
| AGS | chr18 | 48196201 | 48217200 | -0.944129  | Copy loss    |

|     |       |          |          |            |              |
|-----|-------|----------|----------|------------|--------------|
| AGS | chr18 | 48217201 | 48264600 | -0.650029  | Copy loss    |
| AGS | chr18 | 48264601 | 48761400 | -0.946129  | Copy loss    |
| AGS | chr18 | 48761401 | 49486800 | -1.02043   | Copy loss    |
| AGS | chr18 | 49486801 | 51310200 | -1.19543   | Copy loss    |
| AGS | chr18 | 51310201 | 52059137 | -1.03373   | Copy loss    |
| AGS | chr18 | 52209136 | 54946800 | -1.03373   | Copy loss    |
| AGS | chr18 | 54946801 | 54948600 | -8.76023   | Copy loss    |
| AGS | chr18 | 54948601 | 57907200 | -0.924429  | Copy loss    |
| AGS | chr18 | 57907201 | 59397000 | -1.14393   | Copy loss    |
| AGS | chr18 | 59397001 | 59673000 | -0.994229  | Copy loss    |
| AGS | chr18 | 59673001 | 59674200 | -6.83013   | Copy loss    |
| AGS | chr18 | 59674201 | 61790400 | -0.956529  | Copy loss    |
| AGS | chr18 | 61790401 | 63766800 | -1.22383   | Copy loss    |
| AGS | chr18 | 63766801 | 63769200 | -8.76023   | Copy loss    |
| AGS | chr18 | 63769201 | 65065800 | -1.15423   | Copy loss    |
| AGS | chr18 | 65065801 | 66304800 | -1.24323   | Copy loss    |
| AGS | chr18 | 66304801 | 67560000 | -1.16533   | Copy loss    |
| AGS | chr18 | 67560001 | 68467800 | -1.01503   | Copy loss    |
| AGS | chr18 | 68467801 | 71035800 | -1.21363   | Copy loss    |
| AGS | chr18 | 71035801 | 72283354 | -0.951629  | Copy loss    |
| AGS | chr18 | 72333353 | 75721821 | -0.951629  | Copy loss    |
| AGS | chr18 | 75771820 | 78017249 | -0.951629  | Copy loss    |
| AGS | chr18 | 78077248 | 78077248 | -0.951629  | Copy loss    |
| AGS | chr19 | 60000    | 255900   | 0.525471   | Copy gain    |
| AGS | chr19 | 255901   | 7346005  | -0.110529  | Copy neutral |
| AGS | chr19 | 7396004  | 8687199  | -0.110529  | Copy neutral |
| AGS | chr19 | 8737198  | 15046800 | -0.110529  | Copy neutral |
| AGS | chr19 | 15046801 | 15049200 | -8.76023   | Copy loss    |
| AGS | chr19 | 15049201 | 19774800 | -0.0664295 | Copy neutral |
| AGS | chr19 | 19774801 | 20523416 | -0.416929  | Copy neutral |
| AGS | chr19 | 20573415 | 23140800 | -0.416929  | Copy neutral |
| AGS | chr19 | 23140801 | 23142600 | -8.11233   | Copy loss    |
| AGS | chr19 | 23142601 | 23367000 | -0.402829  | Copy neutral |
| AGS | chr19 | 23367001 | 23470200 | -0.584329  | Copy loss    |
| AGS | chr19 | 23470201 | 23802000 | -0.363729  | Copy neutral |
| AGS | chr19 | 23802001 | 23951400 | -0.534829  | Copy loss    |
| AGS | chr19 | 23951401 | 24513000 | -0.373429  | Copy neutral |
| AGS | chr19 | 24513001 | 24631783 | 0.795871   | Copy gain    |
| AGS | chr19 | 27731782 | 27740400 | 6.21737    | Copy gain    |
| AGS | chr19 | 27740401 | 27771900 | 1.03767    | Copy gain    |
| AGS | chr19 | 27771901 | 27786000 | 0.571571   | Copy gain    |
| AGS | chr19 | 27786001 | 27827400 | 0.978271   | Copy gain    |
| AGS | chr19 | 27827401 | 27832200 | 1.63757    | Copy gain    |
| AGS | chr19 | 27832201 | 27836400 | 0.957271   | Copy gain    |
| AGS | chr19 | 27836401 | 27871200 | 1.84447    | Copy gain    |
| AGS | chr19 | 27871201 | 27873600 | 1.03897    | Copy gain    |
| AGS | chr19 | 27873601 | 27890400 | 1.82247    | Copy gain    |
| AGS | chr19 | 27890401 | 27961800 | 0.859871   | Copy gain    |
| AGS | chr19 | 27961801 | 27963000 | -8.36683   | Copy loss    |
| AGS | chr19 | 27963001 | 35759400 | 0.690971   | Copy gain    |
| AGS | chr19 | 35759401 | 35760600 | -8.76023   | Copy loss    |
| AGS | chr19 | 35760601 | 42942600 | 0.711771   | Copy gain    |

|     |       |          |          |             |              |
|-----|-------|----------|----------|-------------|--------------|
| AGS | chr19 | 42942601 | 43144800 | 0.911671    | Copy gain    |
| AGS | chr19 | 43144801 | 43720200 | 1.08677     | Copy gain    |
| AGS | chr19 | 43720201 | 43721400 | -0.377629   | Copy neutral |
| AGS | chr19 | 43721401 | 43803600 | 1.13737     | Copy gain    |
| AGS | chr19 | 43803601 | 43854000 | 0.982071    | Copy gain    |
| AGS | chr19 | 43854001 | 44316600 | 0.726671    | Copy gain    |
| AGS | chr19 | 44316601 | 44914800 | 0.980371    | Copy gain    |
| AGS | chr19 | 44914801 | 44916000 | 2.57257     | Copy gain    |
| AGS | chr19 | 44916001 | 44958600 | 0.986771    | Copy gain    |
| AGS | chr19 | 44958601 | 44988000 | 1.17517     | Copy gain    |
| AGS | chr19 | 44988001 | 45117000 | 0.879971    | Copy gain    |
| AGS | chr19 | 45117001 | 51171000 | 0.622771    | Copy gain    |
| AGS | chr19 | 51171001 | 51172200 | -8.76023    | Copy loss    |
| AGS | chr19 | 51172201 | 52133100 | 0.747171    | Copy gain    |
| AGS | chr19 | 52133101 | 52149600 | -0.868929   | Copy loss    |
| AGS | chr19 | 52149601 | 59118984 | 0.705271    | Copy gain    |
| AGS | chr19 | 59128983 | 59128983 | 0.705271    | Copy gain    |
| AGS | chr20 | 60000    | 1389600  | 0.421371    | Copy neutral |
| AGS | chr20 | 1389601  | 1390800  | -8.76023    | Copy loss    |
| AGS | chr20 | 1390801  | 1557000  | 0.537871    | Copy gain    |
| AGS | chr20 | 1557001  | 1585800  | -1.26493    | Copy loss    |
| AGS | chr20 | 1585801  | 2058000  | 0.456371    | Copy gain    |
| AGS | chr20 | 2058001  | 2059200  | -1.32233    | Copy loss    |
| AGS | chr20 | 2059201  | 2673000  | 0.431171    | Copy neutral |
| AGS | chr20 | 2673001  | 2674200  | -8.76023    | Copy loss    |
| AGS | chr20 | 2674201  | 7398600  | 0.460471    | Copy gain    |
| AGS | chr20 | 7398601  | 7403400  | -8.38403    | Copy loss    |
| AGS | chr20 | 7403401  | 14920800 | 0.453471    | Copy gain    |
| AGS | chr20 | 14920801 | 14935800 | -1.66733    | Copy loss    |
| AGS | chr20 | 14935801 | 15711600 | 0.415471    | Copy neutral |
| AGS | chr20 | 15711601 | 15712800 | -4.82443    | Copy loss    |
| AGS | chr20 | 15712801 | 21286200 | 0.439571    | Copy neutral |
| AGS | chr20 | 21286201 | 21288600 | -8.56353    | Copy loss    |
| AGS | chr20 | 21288601 | 21376800 | 0.528071    | Copy gain    |
| AGS | chr20 | 21376801 | 21378000 | -8.76023    | Copy loss    |
| AGS | chr20 | 21378001 | 21484800 | 0.501071    | Copy gain    |
| AGS | chr20 | 21484801 | 21504600 | -0.00942946 | Copy neutral |
| AGS | chr20 | 21504601 | 21607200 | 0.411471    | Copy neutral |
| AGS | chr20 | 21607201 | 21646800 | 0.540571    | Copy gain    |
| AGS | chr20 | 21646801 | 21681600 | 0.395071    | Copy neutral |
| AGS | chr20 | 21681601 | 21696000 | 0.139971    | Copy neutral |
| AGS | chr20 | 21696001 | 22093200 | 0.451271    | Copy gain    |
| AGS | chr20 | 22093201 | 22556400 | 0.516671    | Copy gain    |
| AGS | chr20 | 22556401 | 22567800 | 0.0112705   | Copy neutral |
| AGS | chr20 | 22567801 | 23011200 | 0.549471    | Copy gain    |
| AGS | chr20 | 23011201 | 23152200 | 0.419271    | Copy neutral |
| AGS | chr20 | 23152201 | 23210400 | 0.589171    | Copy gain    |
| AGS | chr20 | 23210401 | 23470200 | 0.433571    | Copy neutral |
| AGS | chr20 | 23470201 | 23471400 | -0.874229   | Copy loss    |
| AGS | chr20 | 23471401 | 23520000 | 0.399271    | Copy neutral |
| AGS | chr20 | 23520001 | 23603400 | 0.517471    | Copy gain    |
| AGS | chr20 | 23603401 | 23617800 | 0.337771    | Copy neutral |

|     |       |          |          |            |              |
|-----|-------|----------|----------|------------|--------------|
| AGS | chr20 | 23617801 | 23620800 | -0.110929  | Copy neutral |
| AGS | chr20 | 23620801 | 23838000 | 0.510871   | Copy gain    |
| AGS | chr20 | 23838001 | 23841600 | -0.0236295 | Copy neutral |
| AGS | chr20 | 23841601 | 23845800 | 0.678171   | Copy gain    |
| AGS | chr20 | 23845801 | 23874600 | 0.438671   | Copy neutral |
| AGS | chr20 | 23874601 | 23889600 | 0.656971   | Copy gain    |
| AGS | chr20 | 23889601 | 24411600 | 0.428371   | Copy neutral |
| AGS | chr20 | 24411601 | 24412800 | -0.660629  | Copy loss    |
| AGS | chr20 | 24412801 | 24684600 | 0.381271   | Copy neutral |
| AGS | chr20 | 24684601 | 25185000 | 0.483571   | Copy gain    |
| AGS | chr20 | 25185001 | 25592400 | 0.365071   | Copy neutral |
| AGS | chr20 | 25592401 | 25732800 | 0.531871   | Copy gain    |
| AGS | chr20 | 25732801 | 25832400 | 1.21647    | Copy gain    |
| AGS | chr20 | 25832401 | 25838400 | 0.566571   | Copy gain    |
| AGS | chr20 | 25838401 | 25851000 | 0.254371   | Copy neutral |
| AGS | chr20 | 25851001 | 25863000 | 0.655171   | Copy gain    |
| AGS | chr20 | 25863001 | 25904400 | 1.16257    | Copy gain    |
| AGS | chr20 | 25904401 | 25911000 | 1.88807    | Copy gain    |
| AGS | chr20 | 25911001 | 25933800 | 1.18117    | Copy gain    |
| AGS | chr20 | 25933801 | 25954800 | 0.773971   | Copy gain    |
| AGS | chr20 | 25954801 | 26073600 | 0.423271   | Copy neutral |
| AGS | chr20 | 26073601 | 26086800 | 1.32967    | Copy gain    |
| AGS | chr20 | 26086801 | 26121600 | 0.642271   | Copy gain    |
| AGS | chr20 | 26121601 | 26149800 | 1.12897    | Copy gain    |
| AGS | chr20 | 26149801 | 26184900 | 0.595971   | Copy gain    |
| AGS | chr20 | 26184901 | 26191200 | 0.181671   | Copy neutral |
| AGS | chr20 | 26191201 | 26199600 | 0.577771   | Copy gain    |
| AGS | chr20 | 26199601 | 26214000 | 1.95607    | Copy gain    |
| AGS | chr20 | 26214001 | 26238000 | 0.599971   | Copy gain    |
| AGS | chr20 | 26238001 | 26255400 | 1.25517    | Copy gain    |
| AGS | chr20 | 26255401 | 26269800 | 0.742871   | Copy gain    |
| AGS | chr20 | 26269801 | 26298000 | 0.568471   | Copy gain    |
| AGS | chr20 | 26298001 | 26302200 | -6.10143   | Copy loss    |
| AGS | chr20 | 26302201 | 26310000 | 0.889771   | Copy gain    |
| AGS | chr20 | 26310001 | 26319570 | 1.33407    | Copy gain    |
| AGS | chr20 | 29419569 | 29487600 | 1.33407    | Copy gain    |
| AGS | chr20 | 29487601 | 29509200 | 0.738071   | Copy gain    |
| AGS | chr20 | 29509201 | 29535600 | 0.302971   | Copy neutral |
| AGS | chr20 | 29535601 | 29580600 | 0.808071   | Copy gain    |
| AGS | chr20 | 29580601 | 29638800 | 2.75147    | Copy gain    |
| AGS | chr20 | 29638801 | 29645400 | 0.640771   | Copy gain    |
| AGS | chr20 | 29645401 | 29653909 | 3.39077    | Copy gain    |
| AGS | chr20 | 29803908 | 29829000 | 0.796271   | Copy gain    |
| AGS | chr20 | 29829001 | 29830200 | 5.37507    | Copy gain    |
| AGS | chr20 | 29830201 | 30025200 | 0.519671   | Copy gain    |
| AGS | chr20 | 30025201 | 30058200 | 0.291971   | Copy neutral |
| AGS | chr20 | 30058201 | 30059700 | -8.76023   | Copy loss    |
| AGS | chr20 | 30059701 | 34897086 | 0.400871   | Copy neutral |
| AGS | chr20 | 34947085 | 35491200 | 0.400871   | Copy neutral |
| AGS | chr20 | 35491201 | 35492400 | -8.76023   | Copy loss    |
| AGS | chr20 | 35492401 | 35811000 | 0.358071   | Copy neutral |
| AGS | chr20 | 35811001 | 35948400 | 0.461771   | Copy gain    |



|     |       |          |          |           |              |
|-----|-------|----------|----------|-----------|--------------|
| AGS | chr20 | 35948401 | 36073200 | 0.330571  | Copy neutral |
| AGS | chr20 | 36073201 | 36079200 | 0.439871  | Copy neutral |
| AGS | chr20 | 36079201 | 36091800 | 0.662171  | Copy gain    |
| AGS | chr20 | 36091801 | 36325800 | 0.450871  | Copy gain    |
| AGS | chr20 | 36325801 | 36482400 | 0.572571  | Copy gain    |
| AGS | chr20 | 36482401 | 36574200 | 0.302271  | Copy neutral |
| AGS | chr20 | 36574201 | 36751800 | 0.511071  | Copy gain    |
| AGS | chr20 | 36751801 | 36753000 | -1.16533  | Copy loss    |
| AGS | chr20 | 36753001 | 37091100 | 0.456971  | Copy gain    |
| AGS | chr20 | 37091101 | 37093800 | -0.846829 | Copy loss    |
| AGS | chr20 | 37093801 | 37255200 | 0.550771  | Copy gain    |
| AGS | chr20 | 37255201 | 37303800 | 0.316371  | Copy neutral |
| AGS | chr20 | 37303801 | 37335600 | 0.539071  | Copy gain    |
| AGS | chr20 | 37335601 | 37377600 | 0.276971  | Copy neutral |
| AGS | chr20 | 37377601 | 38070600 | 0.397271  | Copy neutral |
| AGS | chr20 | 38070601 | 38965800 | 0.337071  | Copy neutral |
| AGS | chr20 | 38965801 | 39953400 | 0.451171  | Copy gain    |
| AGS | chr20 | 39953401 | 40026600 | 0.252071  | Copy neutral |
| AGS | chr20 | 40026601 | 40677000 | 0.453371  | Copy gain    |
| AGS | chr20 | 40677001 | 41740200 | 0.319371  | Copy neutral |
| AGS | chr20 | 41740201 | 42193800 | 0.410471  | Copy neutral |
| AGS | chr20 | 42193801 | 42271800 | 0.306971  | Copy neutral |
| AGS | chr20 | 42271801 | 42274800 | -1.16673  | Copy loss    |
| AGS | chr20 | 42274801 | 42347400 | 0.250071  | Copy neutral |
| AGS | chr20 | 42347401 | 42498600 | 0.458771  | Copy gain    |
| AGS | chr20 | 42498601 | 42504600 | 0.976971  | Copy gain    |
| AGS | chr20 | 42504601 | 42522000 | 0.649571  | Copy gain    |
| AGS | chr20 | 42522001 | 42762000 | 0.467271  | Copy gain    |
| AGS | chr20 | 42762001 | 42763200 | -5.24313  | Copy loss    |
| AGS | chr20 | 42763201 | 47896200 | 0.424371  | Copy neutral |
| AGS | chr20 | 47896201 | 48498600 | 0.579471  | Copy gain    |
| AGS | chr20 | 48498601 | 48697200 | 0.409571  | Copy neutral |
| AGS | chr20 | 48697201 | 48807000 | 0.509871  | Copy gain    |
| AGS | chr20 | 48807001 | 48808200 | -8.76023  | Copy loss    |
| AGS | chr20 | 48808201 | 58774800 | 0.540171  | Copy gain    |
| AGS | chr20 | 58774801 | 61091438 | 0.373371  | Copy neutral |
| AGS | chr20 | 61141437 | 61213370 | 0.373371  | Copy neutral |
| AGS | chr20 | 61263369 | 62461800 | 0.373371  | Copy neutral |
| AGS | chr20 | 62461801 | 62463600 | -8.76023  | Copy loss    |
| AGS | chr20 | 62463601 | 62725200 | 0.318171  | Copy neutral |
| AGS | chr20 | 62725201 | 62726400 | -8.76023  | Copy loss    |
| AGS | chr20 | 62726401 | 62756400 | 0.360571  | Copy neutral |
| AGS | chr20 | 62756401 | 62760000 | 1.24017   | Copy gain    |
| AGS | chr20 | 62760001 | 62880600 | 0.453071  | Copy gain    |
| AGS | chr20 | 62880601 | 62917200 | 0.676271  | Copy gain    |
| AGS | chr20 | 62917201 | 62937600 | -0.398129 | Copy neutral |
| AGS | chr20 | 62937601 | 62965521 | 0.760871  | Copy gain    |
| AGS | chr20 | 63025520 | 63025520 | 0.760871  | Copy gain    |
| AGS | chr21 | 9411193  | 9414000  | 0.656471  | Copy gain    |
| AGS | chr21 | 9414001  | 9437400  | 1.82777   | Copy gain    |
| AGS | chr21 | 9437401  | 9444000  | 0.580071  | Copy gain    |
| AGS | chr21 | 9444001  | 9468000  | 2.25827   | Copy gain    |

|     |       |          |          |            |              |
|-----|-------|----------|----------|------------|--------------|
| AGS | chr21 | 9468001  | 9483600  | 1.55197    | Copy gain    |
| AGS | chr21 | 9483601  | 9580800  | 0.703771   | Copy gain    |
| AGS | chr21 | 9580801  | 9595549  | 1.30477    | Copy gain    |
| AGS | chr21 | 9645548  | 9648000  | 1.30477    | Copy gain    |
| AGS | chr21 | 9648001  | 9690000  | 1.96347    | Copy gain    |
| AGS | chr21 | 9690001  | 9695400  | 1.42567    | Copy gain    |
| AGS | chr21 | 9695401  | 9700800  | 4.51587    | Copy gain    |
| AGS | chr21 | 9700801  | 9775438  | 1.67527    | Copy gain    |
| AGS | chr21 | 9825437  | 9826800  | -4.35623   | Copy loss    |
| AGS | chr21 | 9826801  | 9876600  | 2.09537    | Copy gain    |
| AGS | chr21 | 9876601  | 9882000  | 0.806071   | Copy gain    |
| AGS | chr21 | 9882001  | 9889800  | 1.95957    | Copy gain    |
| AGS | chr21 | 9889801  | 9902400  | 2.51527    | Copy gain    |
| AGS | chr21 | 9902401  | 9993900  | 1.76837    | Copy gain    |
| AGS | chr21 | 9993901  | 10034921 | 2.45597    | Copy gain    |
| AGS | chr21 | 10084920 | 10207200 | 2.45597    | Copy gain    |
| AGS | chr21 | 10207201 | 10215977 | 1.63027    | Copy gain    |
| AGS | chr21 | 10365976 | 10596600 | 1.63027    | Copy gain    |
| AGS | chr21 | 10596601 | 10603800 | 0.418971   | Copy neutral |
| AGS | chr21 | 10603801 | 10622400 | 1.68067    | Copy gain    |
| AGS | chr21 | 10622401 | 10637400 | 1.25527    | Copy gain    |
| AGS | chr21 | 10637401 | 10647897 | 1.80517    | Copy gain    |
| AGS | chr21 | 10697896 | 10725000 | 3.89707    | Copy gain    |
| AGS | chr21 | 10725001 | 10736400 | 2.71087    | Copy gain    |
| AGS | chr21 | 10736401 | 10749000 | 2.17477    | Copy gain    |
| AGS | chr21 | 10749001 | 10766400 | 3.00097    | Copy gain    |
| AGS | chr21 | 10766401 | 10819200 | 1.65847    | Copy gain    |
| AGS | chr21 | 10819201 | 10820400 | 5.39297    | Copy gain    |
| AGS | chr21 | 10820401 | 10945200 | 1.61707    | Copy gain    |
| AGS | chr21 | 10945201 | 10988700 | 0.703471   | Copy gain    |
| AGS | chr21 | 10988701 | 10995600 | 0.172571   | Copy neutral |
| AGS | chr21 | 10995601 | 11019600 | 0.787371   | Copy gain    |
| AGS | chr21 | 11019601 | 11047200 | 2.33707    | Copy gain    |
| AGS | chr21 | 11047201 | 11085000 | 2.69227    | Copy gain    |
| AGS | chr21 | 11085001 | 11096400 | 2.31277    | Copy gain    |
| AGS | chr21 | 11096401 | 11110800 | 1.85957    | Copy gain    |
| AGS | chr21 | 11110801 | 11116800 | 2.36287    | Copy gain    |
| AGS | chr21 | 11116801 | 11124000 | 2.97837    | Copy gain    |
| AGS | chr21 | 11124001 | 11127000 | 2.57597    | Copy gain    |
| AGS | chr21 | 11127001 | 11140200 | 2.16417    | Copy gain    |
| AGS | chr21 | 11140201 | 11152800 | 2.97707    | Copy gain    |
| AGS | chr21 | 11152801 | 11168400 | 1.99247    | Copy gain    |
| AGS | chr21 | 11168401 | 11170200 | 0.977171   | Copy gain    |
| AGS | chr21 | 11170201 | 11178600 | 2.12237    | Copy gain    |
| AGS | chr21 | 11178601 | 11186400 | 2.47157    | Copy gain    |
| AGS | chr21 | 11186401 | 11188130 | 0.715671   | Copy gain    |
| AGS | chr21 | 14338129 | 14368800 | 1.84897    | Copy gain    |
| AGS | chr21 | 14368801 | 14447400 | 1.08177    | Copy gain    |
| AGS | chr21 | 14447401 | 19480800 | -0.0171295 | Copy neutral |
| AGS | chr21 | 19480801 | 21958800 | -0.111429  | Copy neutral |
| AGS | chr21 | 21958801 | 21961200 | -4.14993   | Copy loss    |
| AGS | chr21 | 21961201 | 22353600 | -0.0869295 | Copy neutral |

|     |       |          |          |              |              |
|-----|-------|----------|----------|--------------|--------------|
| AGS | chr21 | 22353601 | 25093200 | -0.190429    | Copy neutral |
| AGS | chr21 | 25093201 | 25279200 | -0.350329    | Copy neutral |
| AGS | chr21 | 25279201 | 26568600 | -0.200929    | Copy neutral |
| AGS | chr21 | 26568601 | 27606000 | -0.133129    | Copy neutral |
| AGS | chr21 | 27606001 | 42955560 | -0.000229464 | Copy neutral |
| AGS | chr21 | 43005559 | 43226829 | -0.000229464 | Copy neutral |
| AGS | chr21 | 43227328 | 43249343 | -0.000229464 | Copy neutral |
| AGS | chr21 | 43250842 | 44632665 | -0.000229464 | Copy neutral |
| AGS | chr21 | 44682664 | 44846400 | -0.000229464 | Copy neutral |
| AGS | chr21 | 44846401 | 44847600 | -8.76023     | Copy loss    |
| AGS | chr21 | 44847601 | 44891400 | -0.0120295   | Copy neutral |
| AGS | chr21 | 44891401 | 44970600 | 0.0789705    | Copy neutral |
| AGS | chr21 | 44970601 | 44973000 | -0.770629    | Copy loss    |
| AGS | chr21 | 44973001 | 45055200 | 0.127671     | Copy neutral |
| AGS | chr21 | 45055201 | 45284400 | -0.0345295   | Copy neutral |
| AGS | chr21 | 45284401 | 45285600 | -8.76023     | Copy loss    |
| AGS | chr21 | 45285601 | 47062200 | 0.0167705    | Copy neutral |
| AGS | chr21 | 47062201 | 47064000 | -8.76023     | Copy loss    |
| AGS | chr21 | 47064001 | 48119896 | 0.0111705    | Copy neutral |
| AGS | chr21 | 48129895 | 48129895 | 0.0111705    | Copy neutral |
| AGS | chr22 | 16050000 | 16697851 | 0.0308705    | Copy neutral |
| AGS | chr22 | 16847850 | 20509432 | 0.0308705    | Copy neutral |
| AGS | chr22 | 20609431 | 24276600 | 0.0308705    | Copy neutral |
| AGS | chr22 | 24276601 | 24278400 | -7.31063     | Copy loss    |
| AGS | chr22 | 24278401 | 37143600 | 0.00767054   | Copy neutral |
| AGS | chr22 | 37143601 | 37147800 | -8.76023     | Copy loss    |
| AGS | chr22 | 37147801 | 40427400 | 0.0128705    | Copy neutral |
| AGS | chr22 | 40427401 | 40798800 | -0.995729    | Copy loss    |
| AGS | chr22 | 40798801 | 50364778 | -0.0184295   | Copy neutral |
| AGS | chr22 | 50414777 | 51244567 | -0.0184295   | Copy neutral |
| AGS | chr22 | 51304566 | 51304566 | -0.0184295   | Copy neutral |
